# Supplementary material for: Roquin1 inhibits the proliferation of breast cancer cells by inducing G1/S cell cycle arrest via selectively destabilizing the mRNAs of cell cycle–promoting genes
Source: J Exp Clin Cancer Res. 2020 Nov 23;39:255. doi: 10.1186/s13046-020-01766-w (PMC7686734; doi:10.1186/s13046-020-01766-w)
Supplement: Supplementary file 3 — Additional file 3: Supplemental Table 1. RNA-seq analysis of human tumor cells overexpressing Roquin1. [file 13046_2020_1766_MOESM3_ESM.xlsx]

## Sheet: Sheet1
Supplemental Table 1: RNA-seq analysis of human tumor cells overexpressing Roquin1
Genes Name	MCF7/Con	MCF7/Roquin1		Genes Name	MDA-MB-468/Con	MDA-MB-468/Roquin1	A549/Con	A549/Roquin1		Genes Name	HepG2/Con	HepG2/Roquin1
ENSG00000000003(TSPAN6)	13.3932	10.9126		ENSG00000000003(TSPAN6)	56.8601	31.0941	20.4634	11.0237		ENSG00000000457(SCYL3)	4.66792	2.89482
ENSG00000000419(DPM1)	93.9075	114.222		ENSG00000000460(C1orf112)	12.5758	18.0995	9.92096	3.35548		ENSG00000000460(C1orf112)	12.2944	16.8729
ENSG00000000457(SCYL3)	4.73882	5.02787		ENSG00000000971(CFH)	0.232435	0	15.5323	65.2708		ENSG00000000971(CFH)	13.3964	4.92968
ENSG00000000460(C1orf112)	9.21471	11.1605		ENSG00000001167(NFYA)	13.3928	17.4413	8.34758	6.6629		ENSG00000001167(NFYA)	10.2479	6.80674
ENSG00000001036(FUCA2)	63.1428	65.0073		ENSG00000001461(NIPAL3)	13.3705	9.18504	3.61852	7.5001		ENSG00000001461(NIPAL3)	10.4529	7.75909
ENSG00000001084(GCLC)	14.7757	17.4763		ENSG00000001561(ENPP4)	17.7321	6.91559	0.355517	0.150625		ENSG00000001561(ENPP4)	0	0
ENSG00000001167(NFYA)	13.0228	10.5216		ENSG00000001629(ANKIB1)	14.7016	5.84971	15.0441	11.0817		ENSG00000001617(SEMA3F)	32.8549	24.1139
ENSG00000001460(STPG1)	1.69681	1.59064		ENSG00000001630(CYP51A1)	68.6238	26.9176	42.5245	16.0708		ENSG00000001629(ANKIB1)	19.4899	7.93222
ENSG00000001461(NIPAL3)	4.10851	2.56665		ENSG00000001631(KRIT1)	9.87152	4.00518	13.5896	5.95521		ENSG00000001630(CYP51A1)	56.8946	19.106
ENSG00000001497(LAS1L)	28.8644	26.5325		ENSG00000002587(HS3ST1)	0.476798	3.39266	2.7019	5.82692		ENSG00000001631(KRIT1)	13.8553	7.14038
ENSG00000001561(ENPP4)	5.36206	4.31991		ENSG00000002822(MAD1L1)	21.3137	45.6441	9.53441	42.5496		ENSG00000002549(LAP3)	46.5095	35.4474
ENSG00000001617(SEMA3F)	31.8784	29.0657		ENSG00000003147(ICA1)	32.3142	8.22052	1.46934	1.60649		ENSG00000002587(HS3ST1)	0.376841	0.0276868
ENSG00000001629(ANKIB1)	21.1176	14.6047		ENSG00000003249(DBNDD1)	26.8674	61.9744	14.6658	29.575		ENSG00000002746(HECW1)	4.795	6.83136
ENSG00000001630(CYP51A1)	69.0695	43.4935		ENSG00000003400(CASP10)	9.89918	11.0962	2.08953	2.73747		ENSG00000002822(MAD1L1)	9.35425	38.8062
ENSG00000001631(KRIT1)	18.7913	15.8898		ENSG00000004660(CAMKK1)	0.880027	0.868068	6.0808	2.56336		ENSG00000002933(TMEM176A)	0	0
ENSG00000002016(RAD52)	4.82056	5.52418		ENSG00000004777(ARHGAP33)	4.4567	6.5883	7.11076	1.51734		ENSG00000003056(M6PR)	78.0188	188.483
ENSG00000002330(BAD)	26.8103	33.281		ENSG00000004799(PDK4)	0.155586	1.65984	13.8565	14.2184		ENSG00000003147(ICA1)	4.62898	0.960458
ENSG00000002549(LAP3)	40.0018	25.7801		ENSG00000004838(ZMYND10)	1.15755	4.43071	0.0374208	0.158874		ENSG00000003249(DBNDD1)	1.51591	4.40343
ENSG00000002586(CD99)	55.3599	63.9745		ENSG00000004848(ARX)	0.176674	0.103542	5.5537	3.19734		ENSG00000003400(CASP10)	3.14365	4.69768
ENSG00000002822(MAD1L1)	11.7568	11.9011		ENSG00000004864(SLC25A13)	14.5897	4.82836	23.4334	5.86622		ENSG00000003436(TFPI)	97.5814	20.697
ENSG00000002834(LASP1)	54.816	72.5678		ENSG00000005059(MCUB)	3.13107	5.45925	15.588	11.559		ENSG00000003989(SLC7A2)	9.9882	1.77039
ENSG00000002919(SNX11)	19.3219	17.8135		ENSG00000005189(AC004381.6)	6.04543	4.30733	4.35072	1.76719		ENSG00000004139(SARM1)	8.03087	21.5978
ENSG00000003056(M6PR)	53.1669	73.3667		ENSG00000005238(FAM214B)	3.53175	0.935835	5.43504	17.1559		ENSG00000004660(CAMKK1)	3.96592	3.73033
ENSG00000003096(KLHL13)	1.38336	1.24449		ENSG00000005249(PRKAR2B)	40.3021	9.46735	2.91403	3.86018		ENSG00000004777(ARHGAP33)	0.762532	1.67634
ENSG00000003137(CYP26B1)	0.847615	0.222828		ENSG00000005302(MSL3)	19.1526	15.733	13.4551	5.23237		ENSG00000004779(NDUFAB1)	110.461	225.285
ENSG00000003147(ICA1)	15.0444	14.2032		ENSG00000005436(GCFC2)	14.0081	8.40643	10.0516	2.90141		ENSG00000004799(PDK4)	56.1558	12.4999
ENSG00000003249(DBNDD1)	72.164	63.3439		ENSG00000005469(CROT)	2.88736	3.93808	7.4159	5.55281		ENSG00000004838(ZMYND10)	0.23818	0.597196
ENSG00000003393(ALS2)	9.48484	7.94892		ENSG00000005812(FBXL3)	25.1704	10.7998	11.1326	3.35968		ENSG00000004848(ARX)	0	0.028845
ENSG00000003402(CFLAR)	14.4971	13.4081		ENSG00000005844(ITGAL)	1.04541	0.31784	0	0.117744		ENSG00000004864(SLC25A13)	21.2028	10.7017
ENSG00000003436(TFPI)	33.1276	18.9761		ENSG00000005889(ZFX)	7.3744	6.68949	10.6923	6.9365		ENSG00000004897(CDC27)	36.9646	21.1715
ENSG00000003509(NDUFAF7)	6.66746	7.89512		ENSG00000005961(ITGA2B)	1.14451	1.75936	0.0691732	0.0839178		ENSG00000004948(CALCR)	0	0
ENSG00000003756(RBM5)	21.3249	15.9059		ENSG00000006016(CRLF1)	1.69004	9.85541	1.7554	0.351017		ENSG00000005001(PRSS22)	0.185298	0.297841
ENSG00000003987(MTMR7)	2.01869	1.09601		ENSG00000006025(OSBPL7)	2.22897	2.24507	2.57585	7.33617		ENSG00000005020(SKAP2)	7.35503	4.63999
ENSG00000003989(SLC7A2)	143.903	66.2512		ENSG00000006042(TMEM98)	0.282757	0.0909211	9.32449	2.17145		ENSG00000005059(MCUB)	7.26664	8.79118
ENSG00000004059(ARF5)	148.914	164.898		ENSG00000006118(TMEM132A)	53.4776	49.5724	49.6541	164.224		ENSG00000005187(ACSM3)	0.0615566	0.308664
ENSG00000004139(SARM1)	13.5386	13.8088		ENSG00000006283(CACNA1G)	0.034312	0.00778886	1.12855	1.35376		ENSG00000005189(AC004381.6)	5.38875	7.18413
ENSG00000004142(POLDIP2)	70.1363	76.6735		ENSG00000006459(KDM7A)	5.71048	5.19053	1.35415	7.31814		ENSG00000005238(FAM214B)	6.87004	3.3726
ENSG00000004399(PLXND1)	29.6037	23.6852		ENSG00000006468(ETV1)	6.82171	3.49176	1.74189	2.50587		ENSG00000005249(PRKAR2B)	0.147958	0.546401
ENSG00000004455(AK2)	79.3127	90.3527		ENSG00000006534(ALDH3B1)	4.76855	1.08331	92.2205	84.7671		ENSG00000005302(MSL3)	11.9138	9.9509
ENSG00000004478(FKBP4)	155.482	149.045		ENSG00000006606(CCL26)	0	0.203903	0.619873	14.0065		ENSG00000005339(CREBBP)	9.74348	17.4957
ENSG00000004487(KDM1A)	47.7303	46.1629		ENSG00000006607(FARP2)	6.35174	6.21484	7.0158	3.90892		ENSG00000005436(GCFC2)	13.319	6.35809
ENSG00000004534(RBM6)	13.3318	15.6528		ENSG00000006611(USH1C)	0	0	1.10767	6.56502		ENSG00000005469(CROT)	4.8261	3.86607
ENSG00000004660(CAMKK1)	1.87251	0.824274		ENSG00000006625(GGCT)	141.98	154.599	63.9338	16.852		ENSG00000005513(SOX8)	0	0.0286797
ENSG00000004700(RECQL)	13.9277	10.2968		ENSG00000006747(SCIN)	0.0758963	0.112653	0.443187	2.29086		ENSG00000005700(IBTK)	34.7248	11.6739
ENSG00000004766(VPS50)	8.48401	6.45764		ENSG00000006756(ARSD)	8.92342	2.74566	5.45375	3.07988		ENSG00000005812(FBXL3)	24.2342	6.55385
ENSG00000004777(ARHGAP33)	7.99979	3.15636		ENSG00000007171(NOS2)	1.64938	0.622411	0.874533	5.86526		ENSG00000005844(ITGAL)	0	0
ENSG00000004779(NDUFAB1)	184.573	232.106		ENSG00000007264(MATK)	0	0	0.177015	0.912479		ENSG00000005882(PDK2)	4.12232	2.7245
ENSG00000004848(ARX)	0.664737	0.547933		ENSG00000007306(CEACAM7)	0	0	3.33442	14.5054		ENSG00000005889(ZFX)	19.1423	8.96964
ENSG00000004864(SLC25A13)	30.1235	29.3742		ENSG00000007314(SCN4A)	0	0.017676	0.0159716	0.0990947		ENSG00000005961(ITGA2B)	0.0718673	0.366624
ENSG00000004866(ST7)-2	7.47759	6.29829		ENSG00000007402(CACNA2D2)	0.416311	0.57103	0.145859	1.18913		ENSG00000005981(ASB4)	0.0866564	0.432476
ENSG00000004897(CDC27)	30.1731	27.4959		ENSG00000007516(BAIAP3)	0.219652	0.137486	0.0609722	1.23712		ENSG00000006016(CRLF1)	1.46195	5.07536
ENSG00000004948(CALCR)	9.2493	6.14685		ENSG00000007866(TEAD3)	38.304	68.4192	2.38934	5.93328		ENSG00000006025(OSBPL7)	1.44118	4.73677
ENSG00000004961(HCCS)	17.5515	21.3287		ENSG00000007944(MYLIP)	13.9088	39.7323	4.17972	15.4184		ENSG00000006042(TMEM98)	0	0.127124
ENSG00000004975(DVL2)	15.6322	12.8369		ENSG00000007952(NOX1)	0	0.0330951	0.223759	16.3647		ENSG00000006118(TMEM132A)	8.26743	22.4809
ENSG00000005001(PRSS22)	8.91536	19.8868		ENSG00000007968(E2F2)	10.5258	19.5185	8.55573	1.03609		ENSG00000006210(CX3CL1)	0	0.187339
ENSG00000005007(UPF1)	48.2541	48.2641		ENSG00000008056(SYN1)	1.49681	4.15803	0	0.166618		ENSG00000006283(CACNA1G)	0.122192	0.207619
ENSG00000005020(SKAP2)	8.53019	4.50026		ENSG00000008086(CDKL5)	2.60364	1.9681	5.09168	6.02086		ENSG00000006459(KDM7A)	3.41105	2.39264
ENSG00000005022(SLC25A5)	812.76	798.779		ENSG00000008256(CYTH3)	13.613	12.4207	9.81058	5.76159		ENSG00000006468(ETV1)	11.0573	2.78002
ENSG00000005059(MCUB)	14.9405	11.0878		ENSG00000008282(SYPL1)	107.337	21.8451	96.364	25.219		ENSG00000006534(ALDH3B1)	45.7723	37.6555
ENSG00000005075(POLR2J)	87.3219	89.6707		ENSG00000008300(CELSR3)	0.446491	1.94398	3.19631	2.3476		ENSG00000006606(CCL26)	0	4.61225
ENSG00000005100(DHX33)	201.885	207.604		ENSG00000008405(CRY1)	7.23184	7.55823	9.4271	4.60526		ENSG00000006607(FARP2)	7.51729	3.54647
ENSG00000005108(THSD7A)	0.542885	0.375708		ENSG00000008516(MMP25)	0.169102	0.0667506	2.40405e-78	0.581209		ENSG00000006611(USH1C)	0.0518677	0.0311753
ENSG00000005156(LIG3)	6.4148	6.94012		ENSG00000008517(IL32)	0.0534307	0	2.84634	17.1938		ENSG00000006625(GGCT)	53.631	59.0123
ENSG00000005175(RPAP3)	18.743	22.2716		ENSG00000008710(PKD1)	9.32992	32.3543	17.5594	26.1893		ENSG00000006638(TBXA2R)	13.8008	35.9337
ENSG00000005189(AC004381.6)	8.37094	4.6613		ENSG00000008735(MAPK8IP2)	0.133393	31.7496	1.93894	2.89757		ENSG00000006695(COX10)	16.1424	31.9978
ENSG00000005194(CIAPIN1)	21.7364	26.779		ENSG00000009307(CSDE1)	464.676	145.158	119.838	41.1843		ENSG00000006740(ARHGAP44)	0.204276	0.118205
ENSG00000005206(SPPL2B)	13.0997	11.9016		ENSG00000009844(VTA1)	52.1319	19.5567	22.9036	14.3716		ENSG00000006747(SCIN)	0.39895	0.195789
ENSG00000005238(FAM214B)	1.90072	1.21532		ENSG00000009950(MLXIPL)	0.635568	1.00733	0.449672	3.14077		ENSG00000006756(ARSD)	0.543451	0.718115
ENSG00000005243(COPZ2)	1.46751	4.27897		ENSG00000010030(ETV7)	1.76605	3.97639	0.117609	2.2734		ENSG00000007171(NOS2)	1.42568	0.722352
ENSG00000005249(PRKAR2B)	7.71418	8.68696		ENSG00000010270(STARD3NL)	3.13405	1.34542	24.0945	20.3152		ENSG00000007237(GAS7)	0.553674	0.374844
ENSG00000005302(MSL3)	6.127	3.16373		ENSG00000010292(NCAPD2)	27.2387	14.5809	45.8569	8.91181		ENSG00000007255(TRAPPC6A)	1.94559	1.51892
ENSG00000005339(CREBBP)	16.675	18.5029		ENSG00000010310(GIPR)	1.20958	0.187012	1.67933	20.1413		ENSG00000007264(MATK)	0.260394	0
ENSG00000005436(GCFC2)	5.94971	5.94524		ENSG00000010319(SEMA3G)	0.627679	0.0839891	0	0		ENSG00000007306(CEACAM7)	0	0
ENSG00000005448(WDR54)	38.5095	34.6968		ENSG00000010438(PRSS3)	0	0.0646678	11.1529	36.4502		ENSG00000007314(SCN4A)	0.0510576	0.012298
ENSG00000005469(CROT)	12.4711	33.5789		ENSG00000010626(LRRC23)	10.6521	16.889	35.7272	93.4286		ENSG00000007392(LUC7L)	11.1678	53.5633
ENSG00000005471(ABCB4)	0.237559	0.610113		ENSG00000010704(HFE)	11.3399	1.95633	6.52745	3.16757		ENSG00000007402(CACNA2D2)	0.00746355	0.0514955
ENSG00000005483(KMT2E)	22.8958	18.934		ENSG00000010810(FYN)	0.845904	5.99252	1.93689	1.75699		ENSG00000007516(BAIAP3)	0.18348	0.688401
ENSG00000005486(RHBDD2)	51.0799	65.7252		ENSG00000011105(TSPAN9)	28.5592	6.23095	3.99169	5.49782		ENSG00000007866(TEAD3)	9.57333	19.2391
ENSG00000005700(IBTK)	20.8583	24.3433		ENSG00000011143(MKS1)	3.22128	0.287017	6.73468	2.32939		ENSG00000007944(MYLIP)	2.76031	4.30854
ENSG00000005801(ZNF195)	7.74209	12.649		ENSG00000011304(PTBP1)	155.31	112.739	162.09	57.3249		ENSG00000007952(NOX1)	0	0
ENSG00000005810(MYCBP2)	7.21252	8.03651		ENSG00000011332(DPF1)	0.965352	6.44424	1.53143	2.52896		ENSG00000007968(E2F2)	8.94374	16.8593
ENSG00000005812(FBXL3)	10.4728	6.23534		ENSG00000011405(PIK3C2A)	20.6529	8.17035	14.6213	9.69689		ENSG00000008056(SYN1)	0.0282867	0.120387
ENSG00000005882(PDK2)	5.73281	2.99842		ENSG00000011422(PLAUR)	24.2028	42.994	88.1714	353.767		ENSG00000008086(CDKL5)	4.21294	1.64358
ENSG00000005884(ITGA3)	20.1788	28.1135		ENSG00000011426(ANLN)	62.6901	18.8055	98.5253	9.41727		ENSG00000008256(CYTH3)	9.18896	4.17554
ENSG00000005889(ZFX)	7.10808	7.53073		ENSG00000011638(TMEM159)	22.7944	7.62479	5.07658	13.5119		ENSG00000008282(SYPL1)	55.6925	9.04238
ENSG00000005893(LAMP2)	91.1782	99.9424		ENSG00000011677(GABRA3)	11.1402	3.08281	0	0		ENSG00000008300(CELSR3)	4.11522	5.4083
ENSG00000005961(ITGA2B)	1.1123	0.514711		ENSG00000012048(BRCA1)	10.6372	7.74999	19.2691	2.01697		ENSG00000008311(AASS)	1.24306	0.167844
ENSG00000006007(GDE1)	37.678	36.6963		ENSG00000012124(CD22)	3.04528	8.94633	1.23208	0.704292		ENSG00000008394(MGST1)	245.38	509.423
ENSG00000006015(C19orf60)	50.9492	64.5902		ENSG00000012174(MBTPS2)	11.5075	4.28294	27.7921	15.9552		ENSG00000008405(CRY1)	13.1572	7.02052
ENSG00000006016(CRLF1)	7.16041	7.81921		ENSG00000012211(PRICKLE3)	9.01316	5.54702	8.97109	23.2771		ENSG00000008441(NFIX)	0.372672	1.51304
ENSG00000006025(OSBPL7)	7.82174	8.11121		ENSG00000012504(NR1H4)	0	0	3.57568	13.5181		ENSG00000008513(ST3GAL1)	10.0975	11.0412
ENSG00000006047(YBX2)	18.672	12.6958		ENSG00000012779(ALOX5)	1.61773	3.90989	5.12876	26.0288		ENSG00000008516(MMP25)	0.0410714	0
ENSG00000006062(MAP3K14)	1.97182	3.94903		ENSG00000012822(CALCOCO1)	21.6132	14.1718	5.88792	43.981		ENSG00000008517(IL32)	1.79249	13.064
ENSG00000006071(ABCC8)	0.466188	0.523673		ENSG00000012963(UBR7)	32.194	13.4643	39.7178	15.979		ENSG00000008710(PKD1)	16.5922	43.7312
ENSG00000006118(TMEM132A)	73.951	82.3228		ENSG00000012983(MAP4K5)	13.6883	6.29539	17.0255	6.88455		ENSG00000008735(MAPK8IP2)	0.0590369	2.68365
ENSG00000006125(AP2B1)	35.2962	30.9141		ENSG00000013588(GPRC5A)	29.5648	12.9582	101.003	134.437		ENSG00000008988(RPS20)	840.738	1164.98
ENSG00000006194(ZNF263)	17.2644	13.8119		ENSG00000013810(TACC3)	31.5932	40.9199	47.7313	8.54487		ENSG00000009307(CSDE1)	167.43	69.862
ENSG00000006282(SPATA20)	36.0291	33.1482		ENSG00000014123(UFL1)	17.6883	8.21112	9.60082	6.91889		ENSG00000009694(TENM1)	1.01002	0.531743
ENSG00000006327(TNFRSF12A)	161.713	130.938		ENSG00000014257(ACPP)	1.8113	2.26706	0	1.13771		ENSG00000009709(PAX7)	0	0
ENSG00000006432(MAP3K9)	6.82058	6.92422		ENSG00000014824(SLC30A9)	33.4602	7.42481	25.1499	9.66303		ENSG00000009724(MASP2)	0.29464	0.469079
ENSG00000006451(RALA)	34.962	38.3965		ENSG00000014919(COX15)	10.8142	3.00102	25.5284	11.2143		ENSG00000009844(VTA1)	20.49	6.69862
ENSG00000006453(BAIAP2L1)	11.269	14.7757		ENSG00000015171(ZMYND11)	33.9353	9.65603	27.5743	6.2432		ENSG00000009950(MLXIPL)	1.25888	1.29839
ENSG00000006459(KDM7A)	2.06837	1.69446		ENSG00000015520(NPC1L1)	0.0269658	0.640473	0.0387955	0.205442		ENSG00000010030(ETV7)	0.922958	0.726532
ENSG00000006530(AGK)	8.80534	12.0023		ENSG00000015532(XYLT2)	6.75285	6.98693	9.35018	31.8205		ENSG00000010270(STARD3NL)	19.7629	16.0484
ENSG00000006534(ALDH3B1)	4.24	6.28267		ENSG00000016391(CHDH)	4.82298	3.99073	5.26106	2.06547		ENSG00000010292(NCAPD2)	51.6502	21.8052
ENSG00000006576(PHTF2)	18.5943	16.3599		ENSG00000018236(CNTN1)	0.012217	0	113.708	25.9461		ENSG00000010295(IFFO1)	0.0527545	1.17083
ENSG00000006606(CCL26)	0.194987	4.60141		ENSG00000018510(AGPS)	26.4261	9.49641	20.3462	8.09377		ENSG00000010310(GIPR)	0.196973	0.295657
ENSG00000006607(FARP2)	11.9044	8.96922		ENSG00000019485(PRDM11)	1.78674	3.00121	3.91511	1.77477		ENSG00000010319(SEMA3G)	0.16811	0.100455
ENSG00000006625(GGCT)	95.5831	134.613		ENSG00000020181(ADGRA2)	0.455935	0.835296	0.292599	2.02218		ENSG00000010438(PRSS3)	0	0.679481
ENSG00000006634(DBF4)	16.0861	17.6041		ENSG00000020577(SAMD4A)	0.885358	1.93991	5.16707	6.60502		ENSG00000010626(LRRC23)	27.4272	32.6308
ENSG00000006652(IFRD1)	33.5156	55.0583		ENSG00000021300(PLEKHB1)	14.9855	11.7152	0.0361674	0.151076		ENSG00000010704(HFE)	16.8999	2.52626
ENSG00000006695(COX10)	10.9637	12.9987		ENSG00000021355(SERPINB1)	48.485	11.439	42.8695	96.5556		ENSG00000010803(SCMH1)	11.9823	4.89406
ENSG00000006704(GTF2IRD1)	10.888	10.984		ENSG00000021574(SPAST)	13.9988	8.36377	6.53849	3.17445		ENSG00000010810(FYN)	13.0923	7.08967
ENSG00000006712(PAF1)	37.0484	41.3212		ENSG00000021826(CPS1)	0.135039	0.0254752	57.133	18.9369		ENSG00000011007(ELOA)	14.25	17.7902
ENSG00000006715(VPS41)	10.9413	12.9104		ENSG00000022267(FHL1)	0.665554	1.29968	1.88682	5.80352		ENSG00000011028(MRC2)	62.7673	36.6035
ENSG00000006740(ARHGAP44)	5.0692	4.44684		ENSG00000022567(SLC45A4)	6.15224	4.24055	24.3803	3.94606		ENSG00000011052(NME1-NME2)	879.558	1428.66
ENSG00000006744(ELAC2)	36.9863	36.5467		ENSG00000023171(GRAMD1B)	2.64599	2.64273	40.4717	60.9392		ENSG00000011083(SLC6A7)	0.0485982	0.0396719
ENSG00000006747(SCIN)	6.13032	3.68889		ENSG00000023445(BIRC3)	4.31806	5.47991	23.6671	99.8168		ENSG00000011105(TSPAN9)	5.14959	1.79109
ENSG00000006756(ARSD)	10.9643	10.9497		ENSG00000023734(STRAP)	91.8525	23.0982	152.152	41.4751		ENSG00000011114(BTBD7)	4.56986	7.94495
ENSG00000006757(PNPLA4)	1.56308	3.75052		ENSG00000023839(ABCC2)	0.442633	1.45811	95.4865	43.3541		ENSG00000011143(MKS1)	5.72426	3.30192
ENSG00000006831(ADIPOR2)	82.8959	60.9979		ENSG00000023902(PLEKHO1)	2.77095	8.02579	0.831135	2.7613		ENSG00000011198(ABHD5)	14.611	11.3722
ENSG00000006837(CDKL3)	0.345791	1.11888		ENSG00000023909(GCLM)	28.5082	23.1847	71.5399	22.5839		ENSG00000011304(PTBP1)	162.322	116.43
ENSG00000007047(MARK4)	65.0543	77.5477		ENSG00000024526(DEPDC1)	18.556	5.6239	19.925	1.8795		ENSG00000011332(DPF1)	1.2488	2.80149
ENSG00000007080(CCDC124)	76.9019	81.6463		ENSG00000025039(RRAGD)	14.8123	8.74688	1.60292	2.73471		ENSG00000011347(SYT7)	0.332032	1.52536
ENSG00000007168(PAFAH1B1)	29.8212	29.6169		ENSG00000025293(PHF20)	10.2313	5.45587	9.60867	6.85941		ENSG00000011405(PIK3C2A)	16.4919	10.6537
ENSG00000007171(NOS2)	4.44627	2.81083		ENSG00000025708(TYMP)	15.6579	46.6269	73.4386	187.977		ENSG00000011422(PLAUR)	132.965	274.59
ENSG00000007202(KIAA0100)	47.1021	36.7639		ENSG00000025796(SEC63)	49.5819	17.7109	18.6964	6.18461		ENSG00000011426(ANLN)	104.659	21.4674
ENSG00000007255(TRAPPC6A)	44.2514	45.3513		ENSG00000026025(VIM)	67.9647	39.7988	802.129	404.447		ENSG00000011454(RABGAP1)-2	11.5089	11.1838
ENSG00000007264(MATK)	9.46273	7.57197		ENSG00000026103(FAS)	0.353677	0.978866	4.19435	12.9607		ENSG00000011465(DCN)	0.412426	0.312488
ENSG00000007341(ST7L)	3.07148	3.40422		ENSG00000026559(KCNG1)	10.0199	74.8617	1.08869	5.80393		ENSG00000011638(TMEM159)	15.0687	10.4349
ENSG00000007372(PAX6)	0.1007	0.219293		ENSG00000026652(AGPAT4)	0.0186356	0.102172	0.624427	10.0741		ENSG00000011677(GABRA3)	2.34017	1.50152
ENSG00000007376(RPUSD1)	34.9566	35.9792		ENSG00000026950(BTN3A1)	7.39185	4.64715	2.66496	7.11033		ENSG00000012048(BRCA1)	18.7096	15.7729
ENSG00000007384(RHBDF1)	22.0917	22.5509		ENSG00000027869(SH2D2A)	0.0307197	1.16197	0.297546	0.427243		ENSG00000012124(CD22)	0.264318	0.993934
ENSG00000007392(LUC7L)	29.0871	37.6268		ENSG00000028137(TNFRSF1B)	0.020126	0.294315	1.05351	19.8982		ENSG00000012171(SEMA3B)	106.273	133.683
ENSG00000007402(CACNA2D2)	0.374034	0.548125		ENSG00000028203(VEZT)	16.9307	10.0622	27.0434	30.0259		ENSG00000012211(PRICKLE3)	12.9133	24.6225
ENSG00000007516(BAIAP3)	2.84057	2.66977		ENSG00000028277(POU2F2)	0.375319	3.19751	0.208316	1.43055		ENSG00000012504(NR1H4)	0.0217336	0
ENSG00000007520(TSR3)	57.1465	55.6264		ENSG00000029639(TFB1M)	7.16932	10.2758	4.32434	21.3732		ENSG00000012779(ALOX5)	0.0239911	0
ENSG00000007541(PIGQ)	18.9404	19.4245		ENSG00000029993(HMGB3)	117.934	175.245	101.819	49.3005		ENSG00000012822(CALCOCO1)	17.6882	14.8338
ENSG00000007545(CRAMP1)	11.7351	10.7119		ENSG00000030110(BAK1)	23.6459	33.8226	16.8866	36.6615		ENSG00000012963(UBR7)	35.1374	21.9452
ENSG00000007866(TEAD3)	8.90734	9.585		ENSG00000030582(GRN)	78.6081	125.245	75.9521	247.443		ENSG00000012983(MAP4K5)	17.7975	6.06033
ENSG00000007923(DNAJC11)	21.8177	24.2007		ENSG00000031691(CENPQ)	9.76056	8.03259	9.36786	2.38569		ENSG00000013364(MVP)	31.6545	96.2941
ENSG00000007944(MYLIP)	10.5704	15.8194		ENSG00000031698(SARS)	186.803	460.61	46.7242	101.165		ENSG00000013374(NUB1)	30.3472	53.9767
ENSG00000007968(E2F2)	7.0141	4.72514		ENSG00000032742(IFT88)	5.52567	1.43462	6.78659	3.35836		ENSG00000013392(RWDD2A)	5.06577	6.29952
ENSG00000008018(PSMB1)	320.955	367.182		ENSG00000033050(ABCF2)	33.4822	15.4394	36.9294	10.7371		ENSG00000013441(CLK1)	65.2188	50.7834
ENSG00000008056(SYN1)	0.359505	0.354542		ENSG00000033327(GAB2)	20.1258	38.969	1.26612	1.72139		ENSG00000013503(POLR3B)	5.73754	4.60546
ENSG00000008083(JARID2)	10.0068	8.55946		ENSG00000034152(MAP2K3)	8.87593	6.19975	35.1705	19.2614		ENSG00000013523(ANGEL1)	7.02731	4.00481
ENSG00000008086(CDKL5)	0.982183	0.648548		ENSG00000035141(FAM136A)	59.8453	24.9155	47.8378	11.7227		ENSG00000013583(HEBP1)	39.6071	70.6581
ENSG00000008128(CDK11A)	25.8092	24.6499		ENSG00000035499(DEPDC1B)	7.69596	4.31987	15.04	3.02804		ENSG00000013588(GPRC5A)	180.401	31.0937
ENSG00000008130(NADK)	27.6913	19.8819		ENSG00000035664(DAPK2)	4.12517	6.41856	1.80818	10.0261		ENSG00000013619(MAMLD1)	12.5449	6.43987
ENSG00000008256(CYTH3)	2.07723	1.81804		ENSG00000035681(NSMAF)	4.38503	2.67185	15.6271	4.64757		ENSG00000013810(TACC3)	39.7242	74.5123
ENSG00000008277(ADAM22)	1.53027	1.5981		ENSG00000035928(RFC1)	20.9038	6.34064	10.6662	6.89635		ENSG00000014123(UFL1)	14.893	6.42411
ENSG00000008282(SYPL1)	131.618	68.9257		ENSG00000036549(ZZZ3)	25.6601	18.1964	10.1913	6.64584		ENSG00000014257(ACPP)	0.280318	0.0325477
ENSG00000008283(CYB561)	175.807	191.159		ENSG00000037280(FLT4)	0	0	1.53269	0.821305		ENSG00000014824(SLC30A9)	19.1517	4.05886
ENSG00000008294(SPAG9)	25.9424	23.3033		ENSG00000037474(NSUN2)	40.4215	14.2674	47.5226	12.3426		ENSG00000014919(COX15)	15.5822	5.96382
ENSG00000008300(CELSR3)	7.27359	8.31138		ENSG00000037749(MFAP3)	25.0777	16.4123	11.9147	14.6794		ENSG00000015171(ZMYND11)	8.09536	6.59952
ENSG00000008323(PLEKHG6)	1.03918	1.16712		ENSG00000037965(HOXC8)	0.73631	2.53804	0.553169	3.49779		ENSG00000015520(NPC1L1)	0.0377149	0.47373
ENSG00000008324(SS18L2)	18.4403	20.6122		ENSG00000038210(PI4K2B)	22.1846	8.8004	12.2861	4.4279		ENSG00000015532(XYLT2)	13.4445	24.4007
ENSG00000008382(MPND)	23.4201	23.2326		ENSG00000038274(MAT2B)	51.004	20.9231	34.455	21.7147		ENSG00000016391(CHDH)	0	0.0558182
ENSG00000008394(MGST1)	185.794	381.011		ENSG00000039068(CDH1)	42.0805	8.98379	24.6326	15.4179		ENSG00000017260(ATP2C1)	25.5262	10.8913
ENSG00000008405(CRY1)	13.1057	9.67129		ENSG00000040487(PQLC2)	6.0203	25.4726	9.20719	28.9976		ENSG00000017483(SLC38A5)	33.2893	41.2821
ENSG00000008441(NFIX)	2.09206	1.38381		ENSG00000040608(RTN4R)	3.76799	22.2632	6.13602	10.7669		ENSG00000018236(CNTN1)	0	0
ENSG00000008513(ST3GAL1)	12.04	40.3114		ENSG00000041982(TNC)	5.84888	2.07339	1.54172	0.571889		ENSG00000018280(SLC11A1)	0.12901	0.0641293
ENSG00000008516(MMP25)	0.651288	0.422484		ENSG00000042088(TDP1)	11.5278	9.28361	10.3868	4.40913		ENSG00000018510(AGPS)	68.0235	15.2382
ENSG00000008710(PKD1)	25.3968	22.794		ENSG00000042493(CAPG)	99.4639	152.66	30.0586	86.1251		ENSG00000019186(CYP24A1)	0.763446	0
ENSG00000008735(MAPK8IP2)	4.15657	12.1334		ENSG00000043143(JADE2)	13.9958	21.8767	20.1291	15.2213		ENSG00000019485(PRDM11)	2.52044	6.03687
ENSG00000008838(MED24)	16.0539	13.5991		ENSG00000043355(ZIC2)	5.45622	15.5053	6.41317	9.56082		ENSG00000019505(SYT13)	0	0.140852
ENSG00000008853(RHOBTB2)	4.52623	3.1914		ENSG00000043591(ADRB1)	0.352037	2.53294	0.192478	1.93951		ENSG00000019549(SNAI2)	22.2681	5.97113
ENSG00000008869(HEATR5B)	8.77953	9.17041		ENSG00000046604(DSG2)	14.8834	5.61795	47.7458	20.5637		ENSG00000019582(CD74)	0.0243073	0.265212
ENSG00000008952(SEC62)	35.3436	41.2876		ENSG00000047346(FAM214A)	9.27087	5.55998	13.7521	21.0112		ENSG00000020129(NCDN)	7.74216	9.64377
ENSG00000008988(RPS20)	908.414	1275.9		ENSG00000047457(CP)	41.1263	5.82692	22.8841	141.034		ENSG00000020181(ADGRA2)	0.519798	0.775122
ENSG00000009307(CSDE1)	954.993	868.55		ENSG00000047597(XK)	0.074409	0.323342	0.894172	0.722773		ENSG00000020577(SAMD4A)	9.38199	5.97805
ENSG00000009335(UBE3C)	39.6773	38.0309		ENSG00000048052(HDAC9)	1.54997	7.23935	0.742548	3.59565		ENSG00000021300(PLEKHB1)	0.024023	0.0779958
ENSG00000009413(REV3L)	10.3302	9.16098		ENSG00000048140(TSPAN17)	49.5084	21.1044	25.0659	8.31677		ENSG00000021355(SERPINB1)	57.5439	20.4104
ENSG00000009724(MASP2)	0.344658	0.4516		ENSG00000048342(CC2D2A)	0.195121	0.171154	2.36915	2.77377		ENSG00000021574(SPAST)	5.91369	4.14679
ENSG00000009780(FAM76A)	5.13419	4.16687		ENSG00000048392(RRM2B)	10.3771	4.15617	15.7295	26.2638		ENSG00000021826(CPS1)	340.901	46.8024
ENSG00000009830(POMT2)	14.5003	10.1308		ENSG00000048828(FAM120A)	31.8191	10.6787	75.0219	21.244		ENSG00000022267(FHL1)	6.75144	3.89975
ENSG00000009844(VTA1)	36.1838	33.3967		ENSG00000049130(KITLG)	33.8954	17.625	19.0776	10.9323		ENSG00000022567(SLC45A4)	3.55134	1.62706
ENSG00000009950(MLXIPL)	2.61287	1.85712		ENSG00000049246(PER3)	11.2548	5.90139	1.70189	0.142065		ENSG00000022976(ZNF839)	7.11405	4.98721
ENSG00000009954(BAZ1B)	38.7036	32.7017		ENSG00000049249(TNFRSF9)	0	0.0569764	0.539185	2.20776		ENSG00000023171(GRAMD1B)	162.048	63.8751
ENSG00000010017(RANBP9)	45.7967	33.1664		ENSG00000049449(RCN1)	168.388	43.811	113.83	18.653		ENSG00000023287(RB1CC1)	19.5624	6.36206
ENSG00000010072(SPRTN)	8.33927	7.81985		ENSG00000049541(RFC2)	33.0858	104.21	33.5794	30.8344		ENSG00000023608(SNAPC1)	20.4355	7.62341
ENSG00000010165(METTL13)	21.9614	26.7212		ENSG00000049656(CLPTM1L)	102.681	37.1506	85.1465	27.0529		ENSG00000023734(STRAP)	138.188	42.4153
ENSG00000010219(DYRK4)	0.850453	1.08402		ENSG00000050130(JKAMP)	53.8105	15.8425	49.8414	20.1244		ENSG00000023839(ABCC2)	51.7309	41.2364
ENSG00000010244(ZNF207)	62.307	54.0597		ENSG00000050344(NFE2L3)	8.88378	15.3895	5.40872	14.53		ENSG00000023902(PLEKHO1)	1.04504	3.50207
ENSG00000010256(UQCRC1)	73.1806	84.6421		ENSG00000050405(LIMA1)	18.1795	11.7153	4.80652	19.2447		ENSG00000023909(GCLM)	65.8383	107.686
ENSG00000010270(STARD3NL)	13.5165	7.37502		ENSG00000050730(TNIP3)	0	0	0.291498	0.595039		ENSG00000024422(EHD2)	33.4622	70.3871
ENSG00000010278(CD9)	278.569	268.541		ENSG00000050820(BCAR1)	16.8692	61.6036	37.756	40.8179		ENSG00000024526(DEPDC1)	23.8347	6.43733
ENSG00000010292(NCAPD2)	34.866	22.496		ENSG00000051180(RAD51)	10.4162	14.9546	7.73778	1.5964		ENSG00000024862(CCDC28A)	5.63209	1.52643
ENSG00000010310(GIPR)	0.0725819	0.623188		ENSG00000051341(POLQ)	4.97333	6.74114	6.65643	1.3765		ENSG00000025039(RRAGD)	0.116024	0.306178
ENSG00000010318(PHF7)	1.83903	1.27278		ENSG00000051382(PIK3CB)	21.6226	9.87825	18.532	11.576		ENSG00000025293(PHF20)	15.06	6.79517
ENSG00000010322(NISCH)	8.76148	8.15423		ENSG00000051825(MPHOSPH9)	6.90387	4.57948	12.726	7.09058		ENSG00000025434(NR1H3)	9.50447	22.8318
ENSG00000010361(FUZ)	7.81629	7.63927		ENSG00000052344(PRSS8)	40.7889	81.7294	0	0.618188		ENSG00000025708(TYMP)	30.1911	126.042
ENSG00000010379(SLC6A13)	7.1981	6.116		ENSG00000053108(FSTL4)	1.28017	3.18561	1.44655	3.56466		ENSG00000025796(SEC63)	26.3056	11.4238
ENSG00000010404(IDS)	37.5679	34.1641		ENSG00000053372(MRTO4)	16.0373	51.7199	35.5479	22.4079		ENSG00000026025(VIM)	784.643	866.117
ENSG00000010539(ZNF200)	5.35254	4.4597		ENSG00000053524(MCF2L2)	0.435658	0.702272	1.46565	2.05629		ENSG00000026103(FAS)	6.95355	10.3609
ENSG00000010626(LRRC23)	15.6698	16.6786		ENSG00000053747(LAMA3)	0.335742	3.78334	3.13839	6.27482		ENSG00000026508(CD44)	167.37	145.781
ENSG00000010671(BTK)	15.8353	19.94		ENSG00000054116(TRAPPC3)	62.4174	20.9984	45.771	19.3944		ENSG00000026559(KCNG1)	0.146911	0.0384244
ENSG00000010704(HFE)	0.715697	0.454589		ENSG00000054179(ENTPD2)	2.12092	4.45021	0.172817	1.82492		ENSG00000026652(AGPAT4)	0.0500947	0.177789
ENSG00000010803(SCMH1)	4.23213	3.77664		ENSG00000054219(LY75)	13.4971	4.2313	0.687042	0.737742		ENSG00000026751(SLAMF7)	0	0.467819
ENSG00000010810(FYN)	1.56177	0.441187		ENSG00000054598(FOXC1)	17.4729	9.05468	23.5564	20.9233		ENSG00000026950(BTN3A1)	12.1805	13.1982
ENSG00000010818(HIVEP2)	2.96555	2.77595		ENSG00000054793(ATP9A)	13.8247	5.56332	10.3985	3.77746		ENSG00000027075(PRKCH)	15.0936	7.71653
ENSG00000011007(ELOA)	24.7414	24.689		ENSG00000054967(RELT)	6.37811	27.1494	7.49547	14.7065		ENSG00000027697(IFNGR1)	19.9844	11.9422
ENSG00000011009(LYPLA2)	39.2427	55.4106		ENSG00000054983(GALC)	0	0	10.9802	4.96148		ENSG00000027869(SH2D2A)	23.4182	45.6715
ENSG00000011021(CLCN6)	5.17313	4.09223		ENSG00000055147(FAM114A2)	8.72273	3.59156	10.0957	2.03243		ENSG00000028137(TNFRSF1B)	0.0692771	0
ENSG00000011028(MRC2)	1.90597	2.65868		ENSG00000055813(CCDC85A)	0	0	0.968793	2.13115		ENSG00000028203(VEZT)	29.2275	13.832
ENSG00000011052(NME1-NME2)	1659.03	2037.11		ENSG00000056487(PHF21B)	0	0	0.485497	1.4364		ENSG00000028277(POU2F2)	0.0142206	0.456591
ENSG00000011105(TSPAN9)	7.47152	4.61473		ENSG00000056586(RC3H2)	14.1254	6.02589	14.4271	5.7488		ENSG00000029534(ANK1)	0.0164801	0.0280799
ENSG00000011114(BTBD7)	16.0507	14.3543		ENSG00000056736(IL17RB)	11.6053	15.1726	2.68985	2.43289		ENSG00000029639(TFB1M)	11.8752	10.629
ENSG00000011132(APBA3)	4.92603	5.91753		ENSG00000056972(TRAF3IP2)	21.8442	30.71	5.27564	23.4531		ENSG00000029993(HMGB3)	27.0899	49.257
ENSG00000011143(MKS1)	13.2752	11.4242		ENSG00000056998(GYG2)	13.1456	1.34749	3.26955	2.32351		ENSG00000030110(BAK1)	17.0845	29.9888
ENSG00000011198(ABHD5)	9.55066	10.8323		ENSG00000057149(SERPINB3)	0.0643389	0.120071	16.5657	263.717		ENSG00000030582(GRN)	176.818	440.738
ENSG00000011201(ANOS1)	2.89688	4.37047		ENSG00000057252(SOAT1)	13.132	6.50445	13.7257	8.83599		ENSG00000031003(FAM13B)	5.37884	12.0981
ENSG00000011243(AKAP8L)	23.2544	17.681		ENSG00000057657(PRDM1)	3.24262	1.98847	0.269376	5.77117		ENSG00000031081(ARHGAP31)	0.115645	0.217905
ENSG00000011258(MBTD1)	11.9193	10.8958		ENSG00000057704(TMCC3)	0	0.0259936	0.121917	2.18254		ENSG00000031691(CENPQ)	20.6839	14.5484
ENSG00000011260(UTP18)	62.7559	67.4888		ENSG00000058056(USP13)	3.19636	1.48221	4.62822	1.44253		ENSG00000031698(SARS)	88.6929	148.154
ENSG00000011275(RNF216)	11.4391	12.1086		ENSG00000058063(ATP11B)	11.6706	9.44745	7.43844	6.16555		ENSG00000032742(IFT88)	3.0478	1.742
ENSG00000011295(TTC19)	27.2297	35.0713		ENSG00000058091(CDK14)	2.69581	3.45634	1.17763	1.16317		ENSG00000033030(ZCCHC8)	18.4914	25.3182
ENSG00000011304(PTBP1)	161.55	115.162		ENSG00000058668(ATP2B4)	12.8279	3.51806	10.7521	15.937		ENSG00000033050(ABCF2)	29.898	18.0131
ENSG00000011332(DPF1)	3.72432	1.92911		ENSG00000058804(NDC1)	28.0358	11.3871	32.1974	4.74867		ENSG00000033170(FUT8)	5.16799	4.48958
ENSG00000011347(SYT7)	15.2888	11.313		ENSG00000059145(UNKL)	4.27245	5.73237	23.3482	5.18363		ENSG00000033327(GAB2)	5.99454	6.36142
ENSG00000011376(LARS2)	13.4683	12.4541		ENSG00000059588(TARBP1)	15.875	6.36578	14.8441	7.44408		ENSG00000033867(SLC4A7)	18.0151	6.92268
ENSG00000011405(PIK3C2A)	11.7922	8.59735		ENSG00000059769(DNAJC25)	34.9209	14.2652	100.273	33.3992		ENSG00000034152(MAP2K3)	30.8605	12.6128
ENSG00000011422(PLAUR)	1.26508	1.6664		ENSG00000059804(SLC2A3)	0.940607	0.399401	31.631	118.016		ENSG00000034677(RNF19A)	29.5874	11.8145
ENSG00000011426(ANLN)	38.965	20.4286		ENSG00000060140(STYK1)	1.87327	2.77137	0.15577	1.45685		ENSG00000035141(FAM136A)	33.4781	30.7554
ENSG00000011451(WIZ)	20.5528	18.6229		ENSG00000060237(WNK1)	28.2472	22.77	26.5403	17.3639		ENSG00000035499(DEPDC1B)	5.21556	4.01162
ENSG00000011454(RABGAP1)-2	22.1235	14.1992		ENSG00000060339(CCAR1)	45.2256	22.2832	37.3375	13.577		ENSG00000035664(DAPK2)	2.50913	2.56096
ENSG00000011478(QPCTL)	9.13047	5.18617		ENSG00000060566(CREB3L3)	0	0	0	1.24144		ENSG00000035681(NSMAF)	8.76632	5.49587
ENSG00000011485(PPP5C)	34.5765	33.5839		ENSG00000060749(QSER1)	59.7672	33.3495	17.16	7.26046		ENSG00000035928(RFC1)	18.1224	10.7223
ENSG00000011523(CEP68)	4.66539	3.23288		ENSG00000060982(BCAT1)	0	0	0.535402	0.0551901		ENSG00000036549(ZZZ3)	19.7204	7.69502
ENSG00000011566(MAP4K3)	16.374	14.2903		ENSG00000061656(SPAG4)	0.380663	1.76558	1.37628	14.0407		ENSG00000036672(USP2)	2.70853	1.36478
ENSG00000011638(TMEM159)	15.8957	8.41679		ENSG00000061938(TNK2)	4.31481	10.9832	6.44672	7.26249		ENSG00000037280(FLT4)	0.107483	0
ENSG00000012048(BRCA1)	13.9469	8.72074		ENSG00000062282(DGAT2)	8.85986	7.43523	0.792192	5.81573		ENSG00000037474(NSUN2)	69.0237	25.7069
ENSG00000012061(ERCC1)	25.102	24.1885		ENSG00000062370(ZNF112)	8.13072	9.28821	1.65564	2.84761		ENSG00000037749(MFAP3)	17.6587	9.84413
ENSG00000012124(CD22)	0.95721	0.604659		ENSG00000062716(VMP1)	36.7294	7.7052	57.3635	56.9114		ENSG00000037965(HOXC8)	11.6893	39.0053
ENSG00000012171(SEMA3B)	20.3834	25.0811		ENSG00000062725(APPBP2)	7.11387	4.44987	8.17938	6.71302		ENSG00000038210(PI4K2B)	29.7017	8.74994
ENSG00000012174(MBTPS2)	12.5671	12.9922		ENSG00000063180(CA11)	12.5817	13.4565	1.35219	12.0417		ENSG00000038274(MAT2B)	45.4521	12.5054
ENSG00000012211(PRICKLE3)	10.124	11.2888		ENSG00000063587(ZNF275)	0.538037	0.226504	4.97953	3.77591		ENSG00000038295(TLL1)	15.7957	4.34116
ENSG00000012232(EXTL3)	4.12342	4.47449		ENSG00000063601(MTMR1)	23.9107	10.6823	11.3875	4.54929		ENSG00000038427(VCAN)	0.0289822	0.108705
ENSG00000012660(ELOVL5)	54.1204	52.0858		ENSG00000063660(GPC1)	8.44521	30.8005	75.0143	76.0607		ENSG00000039068(CDH1)	0.0361282	0.158579
ENSG00000012822(CALCOCO1)	4.515	4.54012		ENSG00000063761(ADCK1)	5.26629	3.11402	9.87489	1.30439		ENSG00000039139(DNAH5)	0.284915	0.406529
ENSG00000012963(UBR7)	84.2437	52.4253		ENSG00000064042(LIMCH1)	31.1264	12.759	59.8037	45.9183		ENSG00000039650(PNKP)	39.2783	52.3423
ENSG00000012983(MAP4K5)	16.0638	9.07032		ENSG00000064115(TM7SF3)	30.7983	7.78412	44.5761	19.2762		ENSG00000040275(SPDL1)	32.8477	15.4809
ENSG00000013016(EHD3)	2.46749	2.79032		ENSG00000064199(SPA17)	4.92709	1.95225	14.991	8.09193		ENSG00000040487(PQLC2)	11.1944	74.8112
ENSG00000013275(PSMC4)	101.153	129.67		ENSG00000064300(NGFR)	0.0866712	0.925626	0.0774239	2.57994		ENSG00000040608(RTN4R)	5.05963	28.7098
ENSG00000013288(MAN2B2)	6.00889	5.97148		ENSG00000064651(SLC12A2)	71.9208	17.8989	73.5825	17.1979		ENSG00000040933(INPP4A)	7.24252	5.04597
ENSG00000013306(SLC25A39)	226.167	251.666		ENSG00000064666(CNN2)	85.6626	93.9336	60.1085	71.4771		ENSG00000041353(RAB27B)	12.5826	8.22155
ENSG00000013364(MVP)	6.2483	8.67394		ENSG00000064726(BTBD1)	21.9744	7.53056	58.7594	29.963		ENSG00000041880(PARP3)	6.01308	9.638
ENSG00000013374(NUB1)	16.5232	13.494		ENSG00000064763(FAR2)	1.75637	3.31393	0.431729	0.530578		ENSG00000041982(TNC)	4.13	5.38937
ENSG00000013375(PGM3)	13.3004	12.4847		ENSG00000065029(ZNF76)	21.0005	13.3789	4.31121	2.36946		ENSG00000042088(TDP1)	13.0083	6.51586
ENSG00000013392(RWDD2A)	4.17369	2.62646		ENSG00000065243(PKN2)	25.0434	14.2656	13.0125	10.1103		ENSG00000042493(CAPG)	142.158	293.279
ENSG00000013441(CLK1)	40.6102	48.3979		ENSG00000065320(NTN1)	6.38811	12.8531	1.20902	2.98274		ENSG00000043143(JADE2)	21.9042	42.4967
ENSG00000013503(POLR3B)	5.24022	6.25945		ENSG00000065325(GLP2R)	0	0	6.88449	3.95871		ENSG00000043355(ZIC2)	10.7561	7.83454
ENSG00000013523(ANGEL1)	18.2106	12.2733		ENSG00000065328(MCM10)	5.81213	11.5105	16.4744	2.04975		ENSG00000043591(ADRB1)	0.603795	0.842483
ENSG00000013561(RNF14)	26.3194	24.0659		ENSG00000065357(DGKA)	4.15697	3.4906	7.89721	21.2506		ENSG00000044574(HSPA5)	335.664	384.954
ENSG00000013563(DNASE1L1)	23.0268	28.616		ENSG00000065534(MYLK)	0.816995	2.90821	9.68824	2.73713		ENSG00000046604(DSG2)	56.1264	16.8478
ENSG00000013573(DDX11)	20.866	17.8114		ENSG00000065559(MAP2K4)	13.1876	3.41188	18.0307	9.81192		ENSG00000046774(MAGEC2)	0	0
ENSG00000013583(HEBP1)	56.4886	37.4103		ENSG00000065978(YBX1)	443.66	487.695	284.621	87.3918		ENSG00000047346(FAM214A)	6.49351	6.88173
ENSG00000013588(GPRC5A)	38.0066	37.5407		ENSG00000066027(PPP2R5A)	36.5741	12.7881	17.5631	11.2773		ENSG00000047457(CP)	1.17621	0.681265
ENSG00000013619(MAMLD1)	3.33307	3.27719		ENSG00000066084(DIP2B)	12.0118	5.19342	12.7225	8.01551		ENSG00000047597(XK)	15.4052	4.35741
ENSG00000013810(TACC3)	37.8417	23.6761		ENSG00000066279(ASPM)	18.2902	8.36759	26.9747	3.12928		ENSG00000047617(ANO2)	5.18135	1.72515
ENSG00000014123(UFL1)	12.6123	13.9676		ENSG00000066557(LRRC40)	18.9997	5.68084	12.7333	3.95618		ENSG00000047621(C12orf4)	7.95852	11.0365
ENSG00000014138(POLA2)	34.512	30.2621		ENSG00000066583(ISOC1)	19.9836	70.3842	15.4645	31.4994		ENSG00000047644(WWC3)	9.06891	4.45402
ENSG00000014164(ZC3H3)	13.5435	11.8468		ENSG00000066629(EML1)	0.0764756	0.0658204	10.7526	2.7696		ENSG00000047932(GOPC)	27.608	8.98809
ENSG00000014216(CAPN1)	98.5975	121.135		ENSG00000066654(THUMPD1)	8.14915	5.26867	17.2475	9.23288		ENSG00000048052(HDAC9)	1.44392	1.07764
ENSG00000014257(ACPP)	0.344058	0.879806		ENSG00000066735(KIF26A)	0.0113223	1.11462	2.55277	2.20376		ENSG00000048140(TSPAN17)	16.7164	9.84543
ENSG00000014641(MDH1)	104.536	122.822		ENSG00000066739(ATG2B)	3.24534	1.19883	4.48925	2.74199		ENSG00000048342(CC2D2A)	3.6783	6.51471
ENSG00000014824(SLC30A9)	25.769	21.8302		ENSG00000066777(ARFGEF1)	10.072	2.43963	11.4519	6.249		ENSG00000048392(RRM2B)	4.34016	7.52248
ENSG00000014914(MTMR11)	163.175	170.606		ENSG00000066855(MTFR1)	21.2413	10.3257	27.8029	9.57198		ENSG00000048740(CELF2)	0	0
ENSG00000014919(COX15)	17.8078	14.8016		ENSG00000066926(FECH)	11.923	1.44831	21.887	4.83703		ENSG00000048828(FAM120A)	47.8566	16.1416
ENSG00000015133(CCDC88C)	9.02506	7.24808		ENSG00000067066(SP100)	8.56754	9.59218	10.8509	35.5008		ENSG00000049089(COL9A2)	0.908878	4.02473
ENSG00000015153(YAF2)	20.1227	13.6327		ENSG00000067082(KLF6)	10.31	32.5191	20.6333	63.4713		ENSG00000049130(KITLG)	17.2703	12.7355
ENSG00000015171(ZMYND11)	47.1722	32.9941		ENSG00000067113(PLPP1)	4.1892	0.913309	19.3406	21.0387		ENSG00000049167(ERCC8)	5.0712	2.08447
ENSG00000015285(WAS)	1.00904	1.66692		ENSG00000067167(TRAM1)	113.855	30.956	179.025	83.6152		ENSG00000049239(H6PD)	7.68536	3.67371
ENSG00000015475(BID)	39.592	53.0293		ENSG00000067191(CACNB1)	2.70191	3.49159	1.42603	3.11173		ENSG00000049246(PER3)	0.498224	0.746078
ENSG00000015479(MATR3)	97.1426	104.191		ENSG00000067208(EVI5)	3.58338	1.75894	4.19329	2.31332		ENSG00000049247(UTS2)	0.21865	0.0774465
ENSG00000015520(NPC1L1)	0.352586	0.039496		ENSG00000067221(STOML1)	2.44493	2.00397	7.34818	20.7079		ENSG00000049249(TNFRSF9)	0.0525099	1.11665
ENSG00000015532(XYLT2)	16.3349	18.7498		ENSG00000067533(RRP15)	16.5603	11.4792	22.133	6.81724		ENSG00000049283(EPN3)	0	0
ENSG00000015676(NUDCD3)	7.37357	6.17951		ENSG00000067560(RHOA)	230.354	58.9336	311.585	111.03		ENSG00000049323(LTBP1)	1.92993	1.02476
ENSG00000016391(CHDH)	4.69053	3.24486		ENSG00000067646(ZFY)	0	0	4.58937	1.94815		ENSG00000049449(RCN1)	91.0419	24.1117
ENSG00000016864(GLT8D1)	10.0501	8.81517		ENSG00000067704(IARS2)	60.8032	17.9531	101.923	32.8466		ENSG00000049541(RFC2)	41.3499	113.786
ENSG00000017260(ATP2C1)	20.2283	15.0926		ENSG00000067715(SYT1)	0.0302933	0.0130035	9.95154	15.6687		ENSG00000049656(CLPTM1L)	114.171	48.4047
ENSG00000017797(RALBP1)	24.2453	23.8928		ENSG00000067798(NAV3)	0	0	5.40397	7.51097		ENSG00000050130(JKAMP)	32.5578	10.174
ENSG00000018189(RUFY3)	5.60888	5.18978		ENSG00000067840(PDZD4)	1.3586	5.68144	2.1169	3.45897		ENSG00000050165(DKK3)	0.0521076	0.520857
ENSG00000018280(SLC11A1)	0.307046	0.556693		ENSG00000068001(HYAL2)	18.655	16.7745	16.626	24.405		ENSG00000050344(NFE2L3)	1.52379	6.40411
ENSG00000018408(WWTR1)	9.34028	3.8796		ENSG00000068078(FGFR3)	1.84477	1.6478	2.57718	0.851367		ENSG00000050405(LIMA1)	75.7675	52.1923
ENSG00000018610(CXorf56)	15.8352	12.8752		ENSG00000068079(IFI35)	7.73781	9.30682	13.9452	59.5369		ENSG00000050628(PTGER3)	0	0.0427621
ENSG00000018699(TTC27)	13.0144	10.9772		ENSG00000068366(ACSL4)	13.226	4.94761	36.5859	42.3335		ENSG00000050730(TNIP3)	0.0190333	0.230785
ENSG00000019144(PHLDB1)	4.48652	3.38268		ENSG00000068489(PRR11)	17.7697	5.16168	30.438	20.6273		ENSG00000050820(BCAR1)	18.2163	63.3043
ENSG00000019186(CYP24A1)	0.648679	0.34966		ENSG00000068831(RASGRP2)	0.344624	0.415453	3.62356	12.5814		ENSG00000051180(RAD51)	13.8613	21.1432
ENSG00000019485(PRDM11)	2.04704	1.41142		ENSG00000068885(IFT80)	16.6573	3.2963	12.6175	6.77881		ENSG00000051341(POLQ)	5.65428	8.04516
ENSG00000019505(SYT13)	0.56714	0.456139		ENSG00000068971(PPP2R5B)	9.18148	14.2377	4.71557	14.6787		ENSG00000051382(PIK3CB)	13.5587	6.40234
ENSG00000019995(ZRANB1)	12.8752	10.6631		ENSG00000068976(PYGM)	0.114763	0.87547	0.0619798	0.427789		ENSG00000051523(CYBA)	265.851	377.444
ENSG00000020129(NCDN)	18.7036	20.415		ENSG00000069122(ADGRF5)	0.136091	0.595275	0	0		ENSG00000051825(MPHOSPH9)	7.64807	4.54635
ENSG00000020181(ADGRA2)	0.201823	0.156796		ENSG00000069188(SDK2)	0.090653	0.0272035	0.175723	2.1005		ENSG00000052344(PRSS8)	4.63697	9.16416
ENSG00000020256(ZFP64)	9.3292	9.27517		ENSG00000069275(NUCKS1)	93.2284	72.4143	131.627	31.8009		ENSG00000052749(RRP12)	13.9834	34.3704
ENSG00000020426(MNAT1)	91.4383	103.661		ENSG00000069482(GAL)	0.721943	5.89074	4.57703	3.79314		ENSG00000052802(MSMO1)	28.5782	10.5564
ENSG00000020577(SAMD4A)	2.74735	1.48654		ENSG00000069493(CLEC2D)	2.23122	1.43225	0.671019	1.22278		ENSG00000053108(FSTL4)	5.5184	5.0571
ENSG00000020922(MRE11)	10.3429	4.86959		ENSG00000069667(RORA)	0.151594	0.820558	0.149205	2.08805		ENSG00000053254(FOXN3)	13.4293	8.62182
ENSG00000021300(PLEKHB1)	4.93462	5.8602		ENSG00000069696(DRD4)	0.0871983	0.0931108	1.32984	2.70554		ENSG00000053372(MRTO4)	23.9474	60.4762
ENSG00000021355(SERPINB1)	12.1711	14.7127		ENSG00000069702(TGFBR3)	0.958452	1.39784	5.7822	5.58853		ENSG00000053524(MCF2L2)	2.61826	1.37984
ENSG00000021574(SPAST)	9.23198	5.93306		ENSG00000069712(KIAA1107)	1.80975	0.389332	1.03147	1.12635		ENSG00000053747(LAMA3)	3.37411	7.86895
ENSG00000021645(NRXN3)	0.799535	1.43842		ENSG00000069812(HES2)	1.13202	0.340932	0.0457082	2.98824		ENSG00000053918(KCNQ1)	1.1605	4.72409
ENSG00000021762(OSBPL5)	3.143	2.09921		ENSG00000069869(NEDD4)	9.92194	4.06811	26.5127	19.1469		ENSG00000054116(TRAPPC3)	44.3838	34.6493
ENSG00000021776(AQR)	15.6285	13.8886		ENSG00000070081(NUCB2)	16.6682	47.2656	45.7275	75.9751		ENSG00000054118(THRAP3)	32.8686	34.2282
ENSG00000022267(FHL1)	10.6766	6.38148		ENSG00000070087(PFN2)	51.5907	10.5671	124.982	58.377		ENSG00000054148(PHPT1)	54.5939	105.627
ENSG00000022277(RTFDC1)	87.5487	92.3132		ENSG00000070367(EXOC5)	36.8364	14.4473	23.8882	13.1632		ENSG00000054179(ENTPD2)	0.538531	1.23202
ENSG00000022567(SLC45A4)	3.67539	2.65254		ENSG00000070371(CLTCL1)	2.75875	2.0106	4.42157	2.75412		ENSG00000054219(LY75)	0.327527	0.305647
ENSG00000022840(RNF10)	50.268	41.2134		ENSG00000070404(FSTL3)	1.65442	4.43885	156.696	118.276		ENSG00000054598(FOXC1)	20.6075	10.0777
ENSG00000022976(ZNF839)	11.284	10.6975		ENSG00000070444(MNT)	4.35602	12.519	6.15487	9.36647		ENSG00000054793(ATP9A)	10.8461	2.20119
ENSG00000023041(ZDHHC6)	19.3922	15.697		ENSG00000070495(JMJD6)	14.5254	61.6646	27.2653	84.249		ENSG00000054967(RELT)	6.56357	15.6777
ENSG00000023191(RNH1)	69.3279	79.7872		ENSG00000070526(ST6GALNAC1)	0	0	4.43166	0.491712		ENSG00000054983(GALC)	0	0
ENSG00000023228(NDUFS1)	47.4936	47.8118		ENSG00000070540(WIPI1)	18.3385	10.5605	10.1696	9.14982		ENSG00000055044(NOP58)	52.1356	120.065
ENSG00000023287(RB1CC1)	11.4882	7.87635		ENSG00000070601(FRMPD1)	0.186926	0.403662	0	0.048744		ENSG00000055118(KCNH2)	0.0401358	0.0616346
ENSG00000023318(ERP44)	28.4787	40.5003		ENSG00000070614(NDST1)-2	36.9022	19.9927	21.8408	13.0519		ENSG00000055147(FAM114A2)	4.82004	1.75267
ENSG00000023330(ALAS1)	11.5321	16.5254		ENSG00000070669(ASNS)	55.6102	37.9304	25.9932	11.2611		ENSG00000055332(EIF2AK2)	26.6273	25.0305
ENSG00000023445(BIRC3)	9.45881	11.1676		ENSG00000070778(PTPN21)	3.15404	3.07255	3.82754	2.99919		ENSG00000055732(MCOLN3)	1.23179	3.94257
ENSG00000023516(AKAP11)	15.2618	13.2831		ENSG00000070814(TCOF1)	15.5551	45.8975	22.645	14.4221		ENSG00000055813(CCDC85A)	0.188886	0.415043
ENSG00000023572(GLRX2)	36.6846	43.1018		ENSG00000070831(CDC42)	91.3155	39.0369	95.9128	45.4398		ENSG00000055955(ITIH4)	4.81807	12.5889
ENSG00000023608(SNAPC1)	8.97458	5.97016		ENSG00000070915(SLC12A3)	0.334013	0	0	0		ENSG00000056291(NPFFR2)	5.42661	15.958
ENSG00000023697(DERA)	13.976	18.6032		ENSG00000070950(RAD18)	5.06051	12.4941	11.9942	7.40038		ENSG00000056487(PHF21B)	0	0
ENSG00000023734(STRAP)	92.3929	67.4472		ENSG00000070961(ATP2B1)	9.35966	6.25508	62.0372	28.8976		ENSG00000056558(TRAF1)	0.270542	15.3196
ENSG00000023839(ABCC2)	11.2808	17.8241		ENSG00000071073(MGAT4A)	23.9679	9.87467	1.49809	1.15509		ENSG00000056586(RC3H2)	12.6025	5.98727
ENSG00000023892(DEF6)	2.83002	3.52212		ENSG00000071205(ARHGAP10)	3.43829	15.3255	3.58265	8.28096		ENSG00000056736(IL17RB)	0.26908	0.535864
ENSG00000023902(PLEKHO1)	1.84539	3.87997		ENSG00000071243(ING3)	6.27262	6.6452	3.81069	1.34901		ENSG00000056972(TRAF3IP2)	16.2109	19.0322
ENSG00000023909(GCLM)	35.1537	45.401		ENSG00000071537(SEL1L)	10.4286	6.67457	44.1795	12.712		ENSG00000056998(GYG2)	0	0
ENSG00000024048(UBR2)	10.3877	10.3946		ENSG00000071539(TRIP13)	19.7126	29.3932	25.5966	2.73592		ENSG00000057019(DCBLD2)	15.5635	8.17247
ENSG00000024422(EHD2)	2.36523	3.05804		ENSG00000071575(TRIB2)	39.754	47.6239	5.15691	21.1599		ENSG00000057149(SERPINB3)	0.490286	0.145295
ENSG00000024526(DEPDC1)	13.1331	11.4171		ENSG00000072041(SLC6A15)	0	0	0.652262	0.783937		ENSG00000057252(SOAT1)	46.9291	17.3649
ENSG00000024862(CCDC28A)	4.48863	3.54854		ENSG00000072163(LIMS2)	0.540956	2.14663	0.180872	0.49898		ENSG00000057294(PKP2)	13.5273	7.26594
ENSG00000025039(RRAGD)	2.67984	2.47659		ENSG00000072274(TFRC)	89.4852	28.3302	147.049	27.3796		ENSG00000057657(PRDM1)	10.449	4.55842
ENSG00000025156(HSF2)	4.99048	3.47019		ENSG00000072310(SREBF1)	43.8904	31.0559	79.2449	90.1043		ENSG00000057704(TMCC3)	0.0316583	0.208206
ENSG00000025293(PHF20)	6.5183	4.24556		ENSG00000072364(AFF4)	30.4343	18.226	19.4194	19.4254		ENSG00000058056(USP13)	6.99719	4.30117
ENSG00000025423(HSD17B6)	1.57458	1.89256		ENSG00000072415(MPP5)	14.9256	7.41155	14.6811	8.20375		ENSG00000058063(ATP11B)	12.6074	9.01695
ENSG00000025434(NR1H3)	4.63046	6.68966		ENSG00000072422(RHOBTB1)	2.2629	2.27861	13.1504	7.27926		ENSG00000058085(LAMC2)	0.344058	0.602977
ENSG00000025708(TYMP)	14.4489	20.9201		ENSG00000072501(SMC1A)	42.7269	26.0353	38.7337	7.1498		ENSG00000058091(CDK14)	10.0638	4.72043
ENSG00000025770(NCAPH2)	19.5833	14.86		ENSG00000072571(HMMR)	38.3286	6.94697	26.9106	1.69126		ENSG00000058404(CAMK2B)	0.127954	0
ENSG00000025772(TOMM34)	16.378	14.9207		ENSG00000072682(P4HA2)	6.74939	16.4695	18.4219	67.4477		ENSG00000058453(CROCC)	2.44247	3.2145
ENSG00000025796(SEC63)	18.9925	18.2143		ENSG00000072849(DERL2)	13.4684	9.88959	33.7231	13.2859		ENSG00000058668(ATP2B4)	15.7443	5.62399
ENSG00000025800(KPNA6)	16.9729	15.9901		ENSG00000073050(XRCC1)	30.9307	49.3648	25.1408	29.0001		ENSG00000058804(NDC1)	33.6588	9.65332
ENSG00000026103(FAS)	0.901614	4.93441		ENSG00000073111(MCM2)	24.7575	43.1988	32.4226	4.48291		ENSG00000058866(DGKG)	0	0
ENSG00000026297(RNASET2)	44.7306	53.727		ENSG00000073150(PANX2)	0.445281	1.95389	3.47497	4.30084		ENSG00000059145(UNKL)	6.13191	13.7374
ENSG00000026508(CD44)	13.0545	12.0309		ENSG00000073331(ALPK1)	5.53247	2.65783	2.95822	5.78756		ENSG00000059378(PARP12)	19.2169	8.7417
ENSG00000026559(KCNG1)	3.38404	4.0577		ENSG00000073464(CLCN4)	1.20533	0.726479	2.05597	1.37038		ENSG00000059588(TARBP1)	19.8257	6.06264
ENSG00000027001(MIPEP)	8.39355	8.69918		ENSG00000073605(GSDMB)	3.31114	2.44785	1.44866	4.18268		ENSG00000059728(MXD1)	35.66	25.2596
ENSG00000027075(PRKCH)	41.0614	31.5505		ENSG00000073712(FERMT2)	9.54091	2.9759	28.499	16.909		ENSG00000059758(CDK17)	31.9948	8.48721
ENSG00000027697(IFNGR1)	8.47882	18.8381		ENSG00000073737(DHRS9)	0	0.0897369	2.63743	22.9815		ENSG00000059769(DNAJC25)	47.3251	19.0572
ENSG00000027847(B4GALT7)	18.5205	16.5101		ENSG00000073756(PTGS2)	0.0466878	0.0587172	83.6208	162.315		ENSG00000059804(SLC2A3)	58.3169	15.4485
ENSG00000028116(VRK2)	7.48517	5.93787		ENSG00000073792(IGF2BP2)	10.047	15.1947	2.75013	8.63087		ENSG00000060138(YBX3)	145.636	195.867
ENSG00000028203(VEZT)	23.4651	25.5059		ENSG00000073849(ST6GAL1)	23.0801	6.84022	1.72049	1.68928		ENSG00000060140(STYK1)	0.800242	2.50588
ENSG00000028310(BRD9)	14.4165	13.8385		ENSG00000073910(FRY)	1.71417	2.80577	0.00600115	0.300421		ENSG00000060237(WNK1)	71.1704	31.9244
ENSG00000028528(SNX1)	42.1067	42.4917		ENSG00000073969(NSF)	19.9812	7.57325	17.0625	7.10962		ENSG00000060339(CCAR1)	24.7356	16.5024
ENSG00000028839(TBPL1)	11.4338	11.8684		ENSG00000074181(NOTCH3)	68.4805	20.2176	13.0645	4.65313		ENSG00000060566(CREB3L3)	0	0.244041
ENSG00000029153(ARNTL2)	4.9422	4.43122		ENSG00000074201(CLNS1A)	57.8602	15.5016	67.8558	21.6691		ENSG00000060656(PTPRU)	0.462103	1.71892
ENSG00000029363(BCLAF1)	54.9474	57.505		ENSG00000074266(EED)	13.8341	24.0281	16.9986	10.9		ENSG00000060749(QSER1)	13.0902	8.09871
ENSG00000029364(SLC39A9)	29.5365	26.9074		ENSG00000074370(ATP2A3)	3.77649	5.63661	1.43145	3.08908		ENSG00000060982(BCAT1)	35.6438	9.33327
ENSG00000029534(ANK1)	0.19044	0.412119		ENSG00000074410(CA12)	0.921333	1.14189	249.037	617.215		ENSG00000061656(SPAG4)	7.31423	3.87245
ENSG00000029639(TFB1M)	3.45717	4.20709		ENSG00000074416(MGLL)	4.74403	10.0157	41.2378	25.6301		ENSG00000061938(TNK2)	11.1599	15.9205
ENSG00000029725(RABEP1)	29.1075	25.5387		ENSG00000074527(NTN4)	49.9223	15.4323	19.2951	13.4436		ENSG00000062282(DGAT2)	0.660407	2.33278
ENSG00000029993(HMGB3)	122.131	112.936		ENSG00000074621(SLC24A1)	1.31321	0.585173	1.39778	1.41803		ENSG00000062716(VMP1)	73.0638	20.64
ENSG00000030066(NUP160)	31.242	28.8978		ENSG00000074695(LMAN1)	28.0691	5.94388	60.4308	16.9085		ENSG00000062725(APPBP2)	10.5792	4.5655
ENSG00000030110(BAK1)	36.5162	39.0393		ENSG00000075043(KCNQ2)	0.00575287	0	0.0597524	0.283682		ENSG00000063180(CA11)	1.30469	2.58504
ENSG00000030419(IKZF2)	2.49917	1.95183		ENSG00000075089(ACTR6)	51.8035	13.9558	18.272	11.0907		ENSG00000063587(ZNF275)	1.34838	1.2106
ENSG00000030582(GRN)	136.671	133.903		ENSG00000075142(SRI)	147.362	67.1718	35.2594	26.083		ENSG00000063601(MTMR1)	9.06943	5.22862
ENSG00000031003(FAM13B)	8.89056	9.39976		ENSG00000075188(NUP37)	26.0275	23.7729	41.7471	44.8883		ENSG00000063660(GPC1)	26.4782	113.738
ENSG00000031081(ARHGAP31)	0.0960094	0.135897		ENSG00000075213(SEMA3A)	0.854818	0.928289	20.7239	25.8782		ENSG00000063761(ADCK1)	4.82483	4.03515
ENSG00000031691(CENPQ)	7.77533	5.29642		ENSG00000075218(GTSE1)	21.3806	13.7519	19.0897	0.486004		ENSG00000064042(LIMCH1)	69.5496	18.1453
ENSG00000031698(SARS)	95.8732	160.315		ENSG00000075223(SEMA3C)	11.9279	3.76503	39.9072	11.2062		ENSG00000064115(TM7SF3)	53.8004	36.9509
ENSG00000031823(RANBP3)	10.7104	11.192		ENSG00000075239(ACAT1)	39.1478	12.6992	52.267	32.1164		ENSG00000064195(DLX3)	0.261178	0.149595
ENSG00000032219(ARID4A)	12.0655	12.6826		ENSG00000075461(CACNG4)	0	0	3.66992	1.58262		ENSG00000064199(SPA17)	4.83784	1.69086
ENSG00000032389(TSSC1)	24.2143	23.1564		ENSG00000075568(TMEM131)	14.011	8.94588	10.3045	5.21091		ENSG00000064205(WISP2)	198.954	178.317
ENSG00000032444(PNPLA6)	10.5205	18.6878		ENSG00000075618(FSCN1)	0.490863	3.51248	110.942	208.436		ENSG00000064300(NGFR)	0.0470783	0.107685
ENSG00000032742(IFT88)	4.47878	4.00241		ENSG00000075702(WDR62)	9.08441	13.9194	16.9427	2.67465		ENSG00000064309(CDON)	7.64843	2.59984
ENSG00000033011(ALG1)	15.8211	27.645		ENSG00000075945(KIFAP3)	7.22253	6.3706	7.47809	20.9494		ENSG00000064393(HIPK2)	2.98667	3.61494
ENSG00000033030(ZCCHC8)	12.9615	16.4721		ENSG00000076003(MCM6)	72.0231	65.5054	41.5204	11.4632		ENSG00000064601(CTSA)	63.7241	226.6
ENSG00000033050(ABCF2)	32.7795	25.4778		ENSG00000076053(RBM7)	38.6486	15.5059	14.2779	11.3871		ENSG00000064651(SLC12A2)	4.38799	2.99991
ENSG00000033100(CHPF2)	14.8882	15.5431		ENSG00000076067(RBMS2)	6.87942	2.99771	11.1056	6.7095		ENSG00000064666(CNN2)	31.8003	77.9991
ENSG00000033170(FUT8)	53.618	52.0337		ENSG00000076242(MLH1)	12.3443	7.66798	27.0845	5.88175		ENSG00000064726(BTBD1)	37.033	23.5538
ENSG00000033178(UBA6)	13.3155	12.3379		ENSG00000076248(UNG)	27.5506	11.0147	44.3127	12.3846		ENSG00000064763(FAR2)	0.636887	0.765426
ENSG00000033327(GAB2)	4.64922	5.27826		ENSG00000076344(RGS11)	0	0.0236919	0.323829	3.20366		ENSG00000064787(BCAS1)	0.0139784	0.0471739
ENSG00000033627(ATP6V0A1)	12.908	24.2994		ENSG00000076356(PLXNA2)	2.63249	13.6163	8.84026	10.7372		ENSG00000064886(CHI3L2)	0	0.216302
ENSG00000033800(PIAS1)	9.50249	9.69524		ENSG00000076382(SPAG5)	19.3527	16.501	34.3698	17.0736		ENSG00000065029(ZNF76)	7.78354	7.71272
ENSG00000033867(SLC4A7)	11.4404	14.0173		ENSG00000076513(ANKRD13A)	22.8227	6.80563	7.56317	6.16719		ENSG00000065054(SLC9A3R2)	44.3219	71.2327
ENSG00000034053(APBA2)	1.13669	0.812076		ENSG00000076641(PAG1)	0.615287	1.51102	0.121076	1.3543		ENSG00000065243(PKN2)	26.9121	13.0313
ENSG00000034152(MAP2K3)	17.2948	15.5443		ENSG00000076716(GPC4)	7.97055	2.90085	0.01537	0.592176		ENSG00000065308(TRAM2)	16.7647	13.4068
ENSG00000034510(TMSB10)	1666.92	1417.69		ENSG00000076770(MBNL3)	10.7576	4.07945	0.0392228	0.154142		ENSG00000065320(NTN1)	0.0314777	0.206713
ENSG00000034533(ASTE1)	3.92545	3.17286		ENSG00000076864(RAP1GAP)	3.58929	3.51085	15.4004	4.81758		ENSG00000065325(GLP2R)	78.4216	7.9401
ENSG00000034677(RNF19A)	14.4574	24.0039		ENSG00000077147(TM9SF3)	41.3592	13.938	87.0762	34.8921		ENSG00000065328(MCM10)	13.5993	28.9914
ENSG00000034693(PEX3)	9.34913	8.26563		ENSG00000077150(NFKB2)	10.1752	9.69644	31.8572	115.882		ENSG00000065357(DGKA)	9.83119	22.4847
ENSG00000034713(GABARAPL2)	79.0009	88.1689		ENSG00000077152(UBE2T)	43.5619	55.4637	72.1827	48.6488		ENSG00000065457(ADAT1)	12.0468	10.1133
ENSG00000035115(SH3YL1)	26.2975	44.2678		ENSG00000077238(IL4R)	7.35853	8.68326	20.1774	23.6831		ENSG00000065534(MYLK)	0.946182	0.503174
ENSG00000035141(FAM136A)	64.2797	62.2077		ENSG00000077380(DYNC1I2)	47.1763	16.9516	33.2425	20.8161		ENSG00000065559(MAP2K4)	8.04079	3.23156
ENSG00000035403(VCL)	14.1098	15.1398		ENSG00000077420(APBB1IP)	0	0	0.721176	1.05331		ENSG00000065613(SLK)	24.9768	13.5479
ENSG00000035499(DEPDC1B)	25.0748	16.7381		ENSG00000077454(LRCH4)	23.0111	17.6588	11.8063	9.58719		ENSG00000065618(COL17A1)	0.150777	1.46939
ENSG00000035664(DAPK2)	1.94649	4.90572		ENSG00000077463(SIRT6)	6.76468	12.1003	11.3797	44.7024		ENSG00000065809(FAM107B)	41.6569	12.778
ENSG00000035681(NSMAF)	13.7293	10.1679		ENSG00000077684(JADE1)	5.96365	7.93749	23.42	11.026		ENSG00000065923(SLC9A7)	4.89495	5.40805
ENSG00000035687(ADSS)	28.3509	29.046		ENSG00000077713(SLC25A43)	14.6875	4.68369	13.6428	7.88382		ENSG00000065978(YBX1)	491.288	420.965
ENSG00000035862(TIMP2)	8.5221	5.76589		ENSG00000078081(LAMP3)	0.507867	1.78418	0.208521	5.57845		ENSG00000065989(PDE4A)	0.66522	1.25462
ENSG00000035928(RFC1)	17.6839	10.4677		ENSG00000078098(FAP)	5.08825	1.36467	0	0		ENSG00000066027(PPP2R5A)	26.4485	8.41015
ENSG00000036054(TBC1D23)	55.3212	52.0157		ENSG00000078177(N4BP2)	2.57982	2.54123	3.22037	1.71399		ENSG00000066084(DIP2B)	79.9574	29.3829
ENSG00000036257(CUL3)	29.868	37.0126		ENSG00000078668(VDAC3)	97.5138	61.239	212.042	64.307		ENSG00000066248(NGEF)	5.21645	5.59988
ENSG00000036549(ZZZ3)	14.9635	10.5104		ENSG00000078804(TP53INP2)	22.8854	17.8546	3.95373	9.25756		ENSG00000066279(ASPM)	29.7153	15.8205
ENSG00000036672(USP2)	1.36415	1.12877		ENSG00000078900(TP73)	2.22133	8.54815	0.0734388	0.144693		ENSG00000066382(MPPED2)	0	0
ENSG00000036828(CASR)	0.440255	0.671653		ENSG00000078967(UBE2D4)	6.343	3.4925	4.29605	1.46328		ENSG00000066422(ZBTB11)	14.4521	9.67809
ENSG00000037042(TUBG2)	73.2233	79.6305		ENSG00000079150(FKBP7)	1.76977	2.85515	2.091	4.78864		ENSG00000066468(FGFR2)	0	0.0315812
ENSG00000037241(RPL26L1)	68.0694	79.498		ENSG00000079156(OSBPL6)	1.71351	2.56971	1.31447	1.5274		ENSG00000066557(LRRC40)	15.5465	4.21567
ENSG00000037474(NSUN2)	47.9067	34.927		ENSG00000079215(SLC1A3)	54.8263	6.65573	0.154521	0.0739206		ENSG00000066583(ISOC1)	18.5245	46.0119
ENSG00000037637(FBXO42)	15.5794	12.8685		ENSG00000079257(LXN)	49.0806	26.9652	5.29692	35.1503		ENSG00000066629(EML1)	3.49555	4.58448
ENSG00000037749(MFAP3)	15.0228	6.15155		ENSG00000079308(TNS1)	11.6613	8.95092	1.17085	7.20882		ENSG00000066654(THUMPD1)	12.9257	9.01943
ENSG00000037757(MRI1)	114.094	137.463		ENSG00000079335(CDC14A)	6.08914	3.49016	2.69257	0.779939		ENSG00000066735(KIF26A)	9.0263	32.559
ENSG00000037897(METTL1)	15.1333	21.7732		ENSG00000079337(RAPGEF3)	6.0553	2.94019	0.271609	0.97073		ENSG00000066739(ATG2B)	3.78318	2.02032
ENSG00000037965(HOXC8)	10.2315	11.7926		ENSG00000079385(CEACAM1)	9.71587	8.44389	13.9254	69.4476		ENSG00000066777(ARFGEF1)	9.2956	3.60165
ENSG00000038002(AGA)	6.54365	8.65687		ENSG00000079387(SENP1)	10.495	7.82642	11.4534	3.63513		ENSG00000066855(MTFR1)	25.228	8.10007
ENSG00000038210(PI4K2B)	14.0931	10.6587		ENSG00000079435(LIPE)	2.23945	8.15752	3.98639	7.2622		ENSG00000066926(FECH)	11.5705	2.50011
ENSG00000038219(BOD1L1)	5.69755	3.5987		ENSG00000079462(PAFAH1B3)	80.8247	187.388	75.1146	88.59		ENSG00000067048(DDX3Y)	0	0
ENSG00000038274(MAT2B)	24.2418	16.3522		ENSG00000079616(KIF22)	31.3585	36.6179	52.4192	15.5555		ENSG00000067066(SP100)	32.7057	47.875
ENSG00000038358(EDC4)	25.9981	20.4034		ENSG00000079691(CARMIL1)	22.0585	7.48193	10.0107	5.7304		ENSG00000067082(KLF6)	24.8736	20.9507
ENSG00000038382(TRIO)	16.2951	18.8885		ENSG00000079785(DDX1)	93.7863	30.6748	56.5067	26.3666		ENSG00000067113(PLPP1)	9.42007	2.69719
ENSG00000038532(CLEC16A)	6.99319	6.56505		ENSG00000079819(EPB41L2)	26.5359	10.4642	20.2636	12.2197		ENSG00000067167(TRAM1)	138.295	45.7257
ENSG00000039068(CDH1)	193.542	156.53		ENSG00000079931(MOXD1)	0	0.0455023	0.912778	1.88929		ENSG00000067191(CACNB1)	1.86642	3.99505
ENSG00000039123(SKIV2L2)	24.3122	25.1559		ENSG00000079999(KEAP1)	43.5589	46.882	34.855	9.49061		ENSG00000067208(EVI5)	4.31473	1.38476
ENSG00000039139(DNAH5)	0.570926	0.236408		ENSG00000080031(PTPRH)	0.114817	0.954853	1.72594	9.89612		ENSG00000067221(STOML1)	3.25002	6.23812
ENSG00000039319(ZFYVE16)	12.4458	8.42708		ENSG00000080298(RFX3)	1.51876	0.429735	1.45889	1.86791		ENSG00000067533(RRP15)	19.4121	11.4206
ENSG00000039523(FAM65A)	17.0277	16.8113		ENSG00000080371(RAB21)	2.52502	1.84096	6.23198	3.44954		ENSG00000067560(RHOA)	193.307	48.1926
ENSG00000039560(RAI14)	3.75913	4.87362		ENSG00000080493(SLC4A4)	0.0819264	0.550355	3.68492	2.34182		ENSG00000067646(ZFY)	0	0
ENSG00000039650(PNKP)	33.5186	29.261		ENSG00000080546(SESN1)	7.01543	7.54035	2.98395	9.75456		ENSG00000067704(IARS2)	85.1556	26.5378
ENSG00000040199(PHLPP2)	8.03804	6.88026		ENSG00000080802(CNOT4)	10.971	17.5923	6.13229	15.5002		ENSG00000067715(SYT1)	0.684824	0.57811
ENSG00000040275(SPDL1)	17.5586	15.8014		ENSG00000080819(CPOX)	15.5332	6.69885	25.9777	11.0986		ENSG00000067798(NAV3)	1.27837	1.99731
ENSG00000040341(STAU2)	17.1958	17.8354		ENSG00000080823(MOK)	14.2144	8.94637	9.22386	4.21468		ENSG00000067840(PDZD4)	0.424883	1.26247
ENSG00000040487(PQLC2)	9.48282	15.267		ENSG00000080839(RBL1)	6.04221	3.68192	14.6435	3.3238		ENSG00000067900(ROCK1)	21.5521	5.24161
ENSG00000040531(CTNS)	8.17939	7.37997		ENSG00000080986(NDC80)	56.6299	37.0338	8.9538	1.84352		ENSG00000068001(HYAL2)	24.9146	23.524
ENSG00000040608(RTN4R)	5.3548	3.8295		ENSG00000081014(AP4E1)	6.19951	2.56887	11.0591	6.25588		ENSG00000068078(FGFR3)	0.942723	3.79306
ENSG00000040633(PHF23)	21.2396	25.8297		ENSG00000081177(EXD2)	8.13057	6.35233	7.11914	4.45377		ENSG00000068079(IFI35)	55.3531	100.771
ENSG00000040933(INPP4A)	9.16161	7.27445		ENSG00000081181(ARG2)	13.2703	46.7832	0.0367898	4.42588		ENSG00000068097(HEATR6)	10.5039	7.07652
ENSG00000041353(RAB27B)	6.75825	5.99021		ENSG00000081377(CDC14B)	5.42654	2.39492	6.51736	5.05046		ENSG00000068366(ACSL4)	69.0749	9.0026
ENSG00000041357(PSMA4)	396.121	438.764		ENSG00000081665(ZNF506)	20.6009	17.8705	0.114133	0.628645		ENSG00000068489(PRR11)	34.499	29.7654
ENSG00000041515(MYO16)	2.17426	1.32233		ENSG00000081760(AACS)	19.2926	7.93084	21.3507	9.05382		ENSG00000068654(POLR1A)	6.51113	9.71544
ENSG00000041802(LSG1)	23.086	28.8604		ENSG00000081803(CADPS2)	13.3218	3.61821	0.32782	0.271017		ENSG00000068831(RASGRP2)	0	0.54088
ENSG00000041880(PARP3)	1.17815	1.39988		ENSG00000081923(ATP8B1)	6.87234	1.99628	5.81647	4.59645		ENSG00000068885(IFT80)	6.23516	7.5297
ENSG00000041988(THAP3)	6.93931	6.02005		ENSG00000082153(BZW1)	158.453	32.408	151.521	68.9809		ENSG00000068971(PPP2R5B)	6.35262	11.8288
ENSG00000042062(FAM65C)	1.01426	0.533565		ENSG00000082212(ME2)	33.4935	9.68725	32.0501	7.39048		ENSG00000069020(MAST4)	1.12669	2.52061
ENSG00000042088(TDP1)	22.1783	19.4999		ENSG00000082438(COBLL1)	6.91303	11.8205	5.82143	2.06565		ENSG00000069122(ADGRF5)	0.00827131	0
ENSG00000042286(AIFM2)	67.0097	66.4556		ENSG00000082482(KCNK2)	12.3174	3.31332	0	0.0548879		ENSG00000069188(SDK2)	0.0168153	0.0457593
ENSG00000042317(SPATA7)	4.98441	7.57366		ENSG00000082512(TRAF5)	3.48278	1.04303	4.77422	5.27884		ENSG00000069275(NUCKS1)	132.742	56.4614
ENSG00000042429(MED17)	13.9992	14.3607		ENSG00000082898(XPO1)	82.8818	45.7283	98.4012	38.5804		ENSG00000069424(KCNAB2)	13.2156	51.576
ENSG00000042445(RETSAT)	11.1249	13.5274		ENSG00000083099(LYRM2)	22.3307	12.4343	12.9973	3.79018		ENSG00000069431(ABCC9)	0.383388	0.536563
ENSG00000042493(CAPG)	9.49719	9.70138		ENSG00000083290(ULK2)	4.85674	8.08615	10.0368	7.88084		ENSG00000069482(GAL)	104.497	116.472
ENSG00000042753(AP2S1)	159.696	117.094		ENSG00000083454(P2RX5)	1.73042	7.31108	5.12184	8.18975		ENSG00000069493(CLEC2D)	5.6988	3.34166
ENSG00000043039(BARX2)	3.54749	2.90935		ENSG00000083544(TDRD3)	8.43131	4.39619	5.7646	3.623		ENSG00000069535(MAOB)	8.33068	5.24315
ENSG00000043093(DCUN1D1)	16.891	10.7313		ENSG00000083720(OXCT1)	39.3367	17.7005	2.50736	0.420806		ENSG00000069667(RORA)	0.205247	0.650012
ENSG00000043143(JADE2)	23.9382	14.8135		ENSG00000083799(CYLD)	12.6081	3.58718	5.88028	8.26089		ENSG00000069696(DRD4)	0.622408	1.03464
ENSG00000043355(ZIC2)	4.83409	3.19498		ENSG00000083817(ZNF416)	2.99973	5.10083	0.957794	5.08097		ENSG00000069702(TGFBR3)	9.86896	3.86753
ENSG00000043514(TRIT1)	7.60242	5.45178		ENSG00000084073(ZMPSTE24)	90.4306	41.1839	51.2157	15.6172		ENSG00000069712(KIAA1107)	1.05006	0.432886
ENSG00000044090(CUL7)	44.2889	44.7719		ENSG00000084090(STARD7)	70.7114	30.7625	63.2104	17.6905		ENSG00000069812(HES2)	0.247683	2.38966
ENSG00000044115(CTNNA1)	142.281	140.682		ENSG00000084093(REST)	8.88576	5.50393	6.65418	4.63634		ENSG00000069869(NEDD4)	29.7773	8.2225
ENSG00000044446(PHKA2)	6.79856	5.96746		ENSG00000084234(APLP2)	228.583	56.6859	89.2741	46.249		ENSG00000070010(UFD1L)	33.466	109.254
ENSG00000044524(EPHA3)	1.20944	2.22181		ENSG00000084636(COL16A1)	1.18037	5.79297	4.86162	7.07292		ENSG00000070018(LRP6)	13.6026	5.76242
ENSG00000044574(HSPA5)	145.067	188.749		ENSG00000084674(APOB)	0	0	0	0		ENSG00000070081(NUCB2)	47.6342	74.5842
ENSG00000046604(DSG2)	15.2619	12.2374		ENSG00000084710(EFR3B)	0.2664	0.887367	2.05269	2.2716		ENSG00000070087(PFN2)	98.7316	31.8761
ENSG00000046647(GEMIN8)	5.45613	6.69322		ENSG00000084731(KIF3C)	6.29991	27.8244	4.60101	8.17556		ENSG00000070190(DAPP1)	0.863779	0.703668
ENSG00000046651(OFD1)	7.37566	7.82257		ENSG00000084764(MAPRE3)	7.7703	6.41213	3.16194	9.94667		ENSG00000070214(SLC44A1)	21.2347	6.40947
ENSG00000046653(GPM6B)	0.555559	0.287803		ENSG00000084774(CAD)	22.3753	8.79096	16.7321	3.90636		ENSG00000070367(EXOC5)	22.3617	8.02471
ENSG00000047056(WDR37)	49.5153	46.9823		ENSG00000085063(CD59)	623.367	253.497	248.969	184.42		ENSG00000070371(CLTCL1)	8.61405	3.94063
ENSG00000047188(YTHDC2)	8.60787	7.68326		ENSG00000085117(CD82)	156.404	141.63	3.3829	11.5285		ENSG00000070404(FSTL3)	188.777	106.673
ENSG00000047230(CTPS2)	10.953	10.1273		ENSG00000085365(SCAMP1)	18.8844	4.95906	16.6171	18.1404		ENSG00000070444(MNT)	7.19181	12.8561
ENSG00000047249(ATP6V1H)	22.0421	26.5447		ENSG00000085415(SEH1L)	63.9948	69.5528	25.1386	8.48729		ENSG00000070495(JMJD6)	16.1393	79.9949
ENSG00000047315(POLR2B)	37.2579	41.4082		ENSG00000085465(OVGP1)	2.75105	12.6028	0.0352049	1.07332		ENSG00000070526(ST6GALNAC1)	0	0.0307672
ENSG00000047346(FAM214A)	20.8454	22.4604		ENSG00000085552(IGSF9)	7.00449	20.4391	0.3003	0.605304		ENSG00000070540(WIPI1)	8.77261	2.78623
ENSG00000047365(ARAP2)	1.19123	1.36176		ENSG00000085563(ABCB1)	0.17561	0.505087	0.235322	0.639728		ENSG00000070601(FRMPD1)	0	0
ENSG00000047410(TPR)	21.7595	20.0412		ENSG00000085662(AKR1B1)	37.7285	83.8058	1208.66	1530.13		ENSG00000070614(NDST1)-2	9.47169	7.38204
ENSG00000047457(CP)	0.512219	0.843968		ENSG00000085719(CPNE3)	24.404	6.75576	32.991	12.3038		ENSG00000070669(ASNS)	66.7019	37.1067
ENSG00000047578(KIAA0556)	6.84425	8.25248		ENSG00000085741(WNT11)	0.0316294	0.28624	1.09624	8.03486		ENSG00000070759(TESK2)	1.04668	0.857528
ENSG00000047579(DTNBP1)	12.8121	11.4556		ENSG00000085840(ORC1)	8.42318	29.3886	10.3955	4.33519		ENSG00000070778(PTPN21)	3.70951	3.95477
ENSG00000047597(XK)	0.92109	0.758791		ENSG00000085982(USP40)	5.81288	1.54345	12.6449	11.2837		ENSG00000070814(TCOF1)	26.5855	63.3934
ENSG00000047621(C12orf4)	3.4562	2.91908		ENSG00000085999(RAD54L)	13.7797	12.0704	4.92111	0.875781		ENSG00000070831(CDC42)	96.6946	48.739
ENSG00000047634(SCML1)	10.2349	10.5118		ENSG00000086062(B4GALT1)	41.0303	23.4632	198.295	92.6188		ENSG00000070882(OSBPL3)	9.72011	17.447
ENSG00000047644(WWC3)	13.3846	7.5586		ENSG00000086065(CHMP5)	31.1032	6.12098	54.402	36.0292		ENSG00000070915(SLC12A3)	5.77961	0.334059
ENSG00000047662(FAM184B)	6.96634	4.31488		ENSG00000086200(IPO11)	9.03303	1.6908	12.6841	4.56042		ENSG00000070950(RAD18)	9.18418	14.7185
ENSG00000047849(MAP4)	28.662	29.7166		ENSG00000086300(SNX10)	9.51411	11.0171	5.52754	5.17744		ENSG00000070961(ATP2B1)	58.9332	13.5386
ENSG00000047932(GOPC)	10.8902	9.53145		ENSG00000086475(SEPHS1)	46.4276	53.5786	40.9818	13.6355		ENSG00000071054(MAP4K4)	39.6976	35.0006
ENSG00000048028(USP28)	4.10555	2.94589		ENSG00000086506(HBQ1)	0	0	2.29031	19.3263		ENSG00000071073(MGAT4A)	0.774915	0.0652818
ENSG00000048052(HDAC9)	0.38761	0.344947		ENSG00000086548(CEACAM6)	4.5411	4.96917	556.355	1623.73		ENSG00000071205(ARHGAP10)	8.7638	19.9134
ENSG00000048140(TSPAN17)	34.6292	28.829		ENSG00000086598(TMED2)	118.7	40.9486	210.514	66.4548		ENSG00000071243(ING3)	9.34021	8.95848
ENSG00000048162(NOP16)	44.8683	52.9296		ENSG00000086730(LAT2)	0.462055	0.799523	0.998546	1.46764		ENSG00000071282(LMCD1)	0	0.113559
ENSG00000048342(CC2D2A)	1.49472	2.22913		ENSG00000087053(MTMR2)	23.0993	10.2602	19.4009	8.45115		ENSG00000071462(WBSCR22)	76.2089	121.811
ENSG00000048392(RRM2B)	25.2976	20.3842		ENSG00000087074(PPP1R15A)	9.08307	48.9432	18.4336	36.1016		ENSG00000071537(SEL1L)	14.0615	8.83775
ENSG00000048405(ZNF800)	10.0657	10.5711		ENSG00000087076(HSD17B14)	0.121257	0.493588	0.978548	4.38787		ENSG00000071539(TRIP13)	48.4855	36.6326
ENSG00000048471(SNX29)	2.4065	2.52004		ENSG00000087085(ACHE)	0	0.091415	0.234441	3.12219		ENSG00000071575(TRIB2)	0.0713753	0.0787734
ENSG00000048544(MRPS10)	21.5478	22.8183		ENSG00000087111(PIGS)	22.0275	4.06602	26.1005	9.01459		ENSG00000071794(HLTF)	28.5975	9.99321
ENSG00000048649(RSF1)	17.7418	20.5226		ENSG00000087116(ADAMTS2)	0.00731123	0.0895602	0.11992	0.292202		ENSG00000072041(SLC6A15)	17.1848	4.5351
ENSG00000048707(VPS13D)	7.8063	6.88332		ENSG00000087253(LPCAT2)	34.3562	11.8732	4.17631	3.68343		ENSG00000072121(ZFYVE26)	7.24226	15.213
ENSG00000048828(FAM120A)	85.022	56.164		ENSG00000087258(GNAO1)	13.2768	36.2975	0	0.237073		ENSG00000072163(LIMS2)	4.98737	22.1053
ENSG00000048991(R3HDM1)	17.9991	21.5316		ENSG00000087266(SH3BP2)	15.5625	40.3724	2.42252	6.9099		ENSG00000072274(TFRC)	111.686	46.5029
ENSG00000049089(COL9A2)	2.72207	2.86396		ENSG00000087338(GMCL1)	19.3911	6.56245	12.1753	11.331		ENSG00000072310(SREBF1)	49.6227	38.0014
ENSG00000049130(KITLG)	65.1682	44.3662		ENSG00000087494(PTHLH)	0.228547	2.2627	6.87753	18.3614		ENSG00000072364(AFF4)	28.6479	13.8153
ENSG00000049167(ERCC8)	9.54716	7.75715		ENSG00000087586(AURKA)	45.1248	29.8498	87.5902	22.4141		ENSG00000072415(MPP5)	20.2602	7.65791
ENSG00000049239(H6PD)	5.02866	3.76503		ENSG00000087903(RFX2)	1.11032	6.57656	1.42106	3.15539		ENSG00000072422(RHOBTB1)	4.4605	1.22175
ENSG00000049245(VAMP3)	38.7392	30.0155		ENSG00000088002(SULT2B1)	34.3149	27.3638	3.16968	26.3323		ENSG00000072501(SMC1A)	51.7709	36.5028
ENSG00000049246(PER3)	4.00527	1.41882		ENSG00000088035(ALG6)	27.9048	12.0283	13.2582	6.1944		ENSG00000072571(HMMR)	17.8687	2.98123
ENSG00000049247(UTS2)	1.48437	0.478139		ENSG00000088205(DDX18)	27.0014	21.5258	33.8203	16.4049		ENSG00000072682(P4HA2)	27.4038	56.2087
ENSG00000049283(EPN3)	26.1441	24.4336		ENSG00000088280(ASAP3)	10.6096	5.57574	1.16531	3.38877		ENSG00000072840(EVC)	2.04162	2.76467
ENSG00000049323(LTBP1)	11.2901	8.48092		ENSG00000088325(TPX2)	47.5709	29.167	64.0932	8.99508		ENSG00000072849(DERL2)	26.798	24.3605
ENSG00000049449(RCN1)	5.01909	2.26876		ENSG00000088356(PDRG1)	10.4173	38.4798	17.9206	18.5658		ENSG00000072858(SIDT1)	0.0595362	0.237232
ENSG00000049541(RFC2)	36.2575	39.7332		ENSG00000088538(DOCK3)	3.23369	6.72847	2.10985	3.1936		ENSG00000072954(TMEM38A)	4.16914	6.37541
ENSG00000049618(ARID1B)	7.79155	7.60674		ENSG00000088543(C3orf18)	0.519394	0.661068	1.83229	2.27999		ENSG00000073008(PVR)	40.3572	63.7247
ENSG00000049656(CLPTM1L)	64.2007	54.1793		ENSG00000088756(ARHGAP28)	5.391	1.19005	0.0145819	0.0123698		ENSG00000073050(XRCC1)	26.2931	46.1235
ENSG00000049759(NEDD4L)	10.7597	9.79851		ENSG00000088766(CRLS1)	19.3544	8.22218	90.4461	45.4145		ENSG00000073111(MCM2)	60.9821	66.091
ENSG00000049768(FOXP3)	0.41346	0.366658		ENSG00000088826(SMOX)	14.1236	43.3167	224.233	232.776		ENSG00000073146(MOV10L1)	0.173443	0.614148
ENSG00000049769(PPP1R3F)	4.64635	6.08574		ENSG00000088836(SLC4A11)	99.8583	19.9796	2.31215	4.42705		ENSG00000073150(PANX2)	3.582	10.6278
ENSG00000049860(HEXB)	74.7013	99.7953		ENSG00000088899(LZTS3)	15.2612	16.1386	1.99567	8.4657		ENSG00000073282(TP63)	0.130172	0.176882
ENSG00000049883(PTCD2)	6.64556	5.35514		ENSG00000088930(XRN2)	55.7958	14.5806	65.3702	17.2873		ENSG00000073331(ALPK1)	2.19722	1.17334
ENSG00000050030(KIAA2022)	0.419446	0.41971		ENSG00000088970(KIZ)	2.55682	2.82541	3.04646	10.5227		ENSG00000073350(LLGL2)	20.7353	38.5509
ENSG00000050130(JKAMP)	33.5049	43.6067		ENSG00000089060(SLC8B1)	7.57307	13.4019	6.14585	22.8773		ENSG00000073464(CLCN4)	0.626966	0.832732
ENSG00000050327(ARHGEF5)	9.95741	8.96641		ENSG00000089063(TMEM230)	93.7624	16.8828	140.95	41.8875		ENSG00000073605(GSDMB)	9.83892	13.5131
ENSG00000050344(NFE2L3)	5.58272	6.78561		ENSG00000089091(DZANK1)	1.22591	0.294468	1.16526	1.16499		ENSG00000073711(PPP2R3A)	1.78695	1.07974
ENSG00000050405(LIMA1)	6.80766	10.4064		ENSG00000089116(LHX5)	0	0	0	0.222159		ENSG00000073712(FERMT2)	71.6446	21.0752
ENSG00000050426(LETMD1)	28.086	34.6321		ENSG00000089123(TASP1)	5.4326	3.96435	6.94862	4.93501		ENSG00000073737(DHRS9)	0	0
ENSG00000050438(SLC4A8)	3.02811	4.51909		ENSG00000089127(OAS1)	14.0853	10.9055	49.4041	348.789		ENSG00000073756(PTGS2)	67.5458	12.7671
ENSG00000050628(PTGER3)	0.701011	0.563171		ENSG00000089163(SIRT4)	0.759182	1.09993	0.808425	8.24639		ENSG00000073792(IGF2BP2)	3.57399	4.86689
ENSG00000050748(MAPK9)	48.6239	39.4051		ENSG00000089195(TRMT6)	16.6981	32.5922	19.1405	21.3278		ENSG00000073849(ST6GAL1)	0.0724022	0.0856409
ENSG00000050767(COL23A1)	0.45329	0.384945		ENSG00000089199(CHGB)	0	0.336579	0.494568	3.9331		ENSG00000073910(FRY)	5.53341	5.64612
ENSG00000050820(BCAR1)	53.6031	53.0123		ENSG00000089248(ERP29)	67.2273	211.683	52.4136	84.1176		ENSG00000073921(PICALM)	138.937	39.5454
ENSG00000051009(FAM160A2)	5.12981	5.13508		ENSG00000089327(FXYD5)	137.627	209.837	103.903	271.68		ENSG00000073969(NSF)	15.7416	7.96947
ENSG00000051108(HERPUD1)	11.9863	8.64843		ENSG00000089685(BIRC5)	59.0058	20.6723	77.0997	3.27128		ENSG00000074181(NOTCH3)	0.0811199	0.21115
ENSG00000051128(HOMER3)	20.4327	19.1747		ENSG00000089820(ARHGAP4)	1.37586	2.40473	1.22752	1.57426		ENSG00000074201(CLNS1A)	68.2534	20.5856
ENSG00000051180(RAD51)	14.7158	12.8903		ENSG00000089847(ANKRD24)	0	0.0302681	0.103744	2.00431		ENSG00000074266(EED)	22.9606	46.749
ENSG00000051341(POLQ)	7.94835	5.84407		ENSG00000089902(RCOR1)	15.8849	10.233	21.9075	18.3941		ENSG00000074276(CDHR2)	0.020534	0.0169848
ENSG00000051382(PIK3CB)	28.0595	17.4668		ENSG00000090020(SLC9A1)	7.68654	16.8216	8.5167	19.4183		ENSG00000074317(SNCB)	0	0
ENSG00000051523(CYBA)	526.189	726.336		ENSG00000090060(PAPOLA)	46.4453	11.3202	63.522	28.4856		ENSG00000074370(ATP2A3)	0.78634	0.304096
ENSG00000051596(THOC3)	119.356	134.317		ENSG00000090061(CCNK)	15.4712	6.38696	18.3196	19.6972		ENSG00000074410(CA12)	0.181614	0.240205
ENSG00000051620(HEBP2)	26.1911	30.4422		ENSG00000090238(YPEL3)	23.2114	24.1301	1.10661	21.0021		ENSG00000074416(MGLL)	28.8578	33.9323
ENSG00000051825(MPHOSPH9)	13.7797	9.26594		ENSG00000090263(MRPS33)	28.9286	6.09182	37.4468	11.7652		ENSG00000074527(NTN4)	21.6792	3.52819
ENSG00000052126(PLEKHA5)	4.12717	3.56382		ENSG00000090339(ICAM1)	17.0573	49.0675	1.94019	33.6961		ENSG00000074590(NUAK1)	6.51709	2.12617
ENSG00000052344(PRSS8)	50.5609	84.4289		ENSG00000090376(IRAK3)	0.318449	0.32744	0.204104	0.437651		ENSG00000074621(SLC24A1)	1.04393	0.310434
ENSG00000052723(SIKE1)	47.9707	56.2113		ENSG00000090554(FLT3LG)	3.93161	5.34157	1.80834	13.162		ENSG00000074657(ZNF532)	9.28823	5.89323
ENSG00000052749(RRP12)	13.5875	14.8381		ENSG00000090621(PABPC4)	123.258	40.8731	47.88	12.054		ENSG00000074695(LMAN1)	111.608	15.7481
ENSG00000052795(FNIP2)	2.69282	2.6707		ENSG00000090661(CERS4)	46.3658	49.7345	0.267508	2.75589		ENSG00000074842(MYDGF)	248.428	369.266
ENSG00000052802(MSMO1)	38.6692	21.5964		ENSG00000090776(EFNB1)	3.57245	5.18113	3.95015	15.7706		ENSG00000074964(ARHGEF10L)	3.41816	7.15395
ENSG00000052841(TTC17)	10.6339	18.5071		ENSG00000090889(KIF4A)	19.6065	10.7006	21.3803	1.3667		ENSG00000075043(KCNQ2)	0.017589	0.395341
ENSG00000053108(FSTL4)	2.93326	3.08632		ENSG00000090971(NAT14)	6.51803	19.5107	30.6834	67.8646		ENSG00000075089(ACTR6)	16.1243	5.47622
ENSG00000053254(FOXN3)	7.97562	2.64915		ENSG00000090975(PITPNM2)	1.86676	5.56118	6.20073	9.80913		ENSG00000075142(SRI)	56.2289	28.9104
ENSG00000053371(AKR7A2)	50.6613	40.2355		ENSG00000091039(OSBPL8)	16.5554	11.0975	31.9928	14.6962		ENSG00000075188(NUP37)	56.7895	37.2015
ENSG00000053372(MRTO4)	32.4197	38.4977		ENSG00000091106(NLRC4)	0.0670715	0.0801031	0.0188499	0.0578613		ENSG00000075213(SEMA3A)	0	0
ENSG00000053501(USE1)	8.25682	6.36605		ENSG00000091127(PUS7)	9.8587	7.34481	11.3019	3.88562		ENSG00000075218(GTSE1)	15.9218	9.25369
ENSG00000053702(NRIP2)	0.545565	0.50759		ENSG00000091129(NRCAM)	0	0	34.2612	19.1209		ENSG00000075223(SEMA3C)	35.3804	3.76422
ENSG00000053747(LAMA3)	1.77097	2.15845		ENSG00000091140(DLD)	60.7054	6.43169	105.923	25.6		ENSG00000075239(ACAT1)	66.3829	19.7642
ENSG00000053770(AP5M1)	19.5495	19.3426		ENSG00000091157(WDR7)	4.5987	2.54169	3.69759	2.0986		ENSG00000075461(CACNG4)	0	0
ENSG00000053900(ANAPC4)	9.17371	8.48939		ENSG00000091317(CMTM6)	49.4244	5.18001	35.7713	7.76006		ENSG00000075568(TMEM131)	10.0866	4.97641
ENSG00000054116(TRAPPC3)	45.4331	30.6751		ENSG00000091436(MAP3K20)	23.3447	9.75607	23.9668	10.1567		ENSG00000075618(FSCN1)	186.033	532.501
ENSG00000054118(THRAP3)	45.6618	42.0765		ENSG00000091513(TF)	15.2108	5.0407	0	0.345123		ENSG00000075651(PLD1)-2	5.89076	3.69715
ENSG00000054148(PHPT1)	112.444	158.388		ENSG00000091592(NLRP1)	0.271265	0.0325894	0	0.571137		ENSG00000075651(PLD1)-3	0.543059	0.264379
ENSG00000054179(ENTPD2)	7.43872	9.9073		ENSG00000091622(PITPNM3)	6.38568	3.12257	3.31314	1.79289		ENSG00000075702(WDR62)	7.77049	21.1129
ENSG00000054219(LY75)	0.689409	0.704153		ENSG00000091651(ORC6)	14.7903	41.7621	24.5269	7.38564		ENSG00000075711(DLG1)	15.0133	15.2965
ENSG00000054267(ARID4B)	24.4779	32.5787		ENSG00000091844(RGS17)	0.263314	0.118234	3.75071	7.60873		ENSG00000075945(KIFAP3)	14.5203	13.195
ENSG00000054277(OPN3)	12.2838	12.8876		ENSG00000092036(HAUS4)	32.7689	33.7638	73.0487	43.6137		ENSG00000076003(MCM6)	55.5598	42.623
ENSG00000054282(SDCCAG8)	3.95391	4.09115		ENSG00000092068(SLC7A8)	0.995974	0.56436	0.151414	0.435509		ENSG00000076053(RBM7)	29.7586	7.01968
ENSG00000054392(HHAT)	1.16606	1.16999		ENSG00000092140(G2E3)	8.79535	4.389	16.3212	7.05395		ENSG00000076067(RBMS2)	11.2779	5.6832
ENSG00000054523(KIF1B)	13.2923	12.1552		ENSG00000092421(SEMA6A)	0.254519	0.206213	0.34054	1.56378		ENSG00000076201(PTPN23)	12.1511	31.2669
ENSG00000054598(FOXC1)	5.54175	3.5701		ENSG00000092470(WDR76)	14.4649	18.1123	15.2878	3.92636		ENSG00000076242(MLH1)	15.2112	9.26362
ENSG00000054611(TBC1D22A)	6.49639	8.25699		ENSG00000092529(CAPN3)	1.04364	0.179067	0.0229851	0.102674		ENSG00000076248(UNG)	39.9346	17.2799
ENSG00000054654(SYNE2)	18.2917	14.8471		ENSG00000092621(PHGDH)	243.068	474.579	8.69121	3.94351		ENSG00000076344(RGS11)	0.0186293	0
ENSG00000054690(PLEKHH1)	11.7647	10.6754		ENSG00000092853(CLSPN)	7.6397	26.3351	9.22483	1.98861		ENSG00000076356(PLXNA2)	2.99086	18.6904
ENSG00000054793(ATP9A)	42.136	25.7676		ENSG00000092929(UNC13D)	16.1147	35.9711	18.6356	11.5672		ENSG00000076382(SPAG5)	34.1358	38.4691
ENSG00000054965(FAM168A)	120.113	110.534		ENSG00000092964(DPYSL2)	23.2667	8.70724	40.7605	18.5234		ENSG00000076513(ANKRD13A)	10.4455	4.44892
ENSG00000054967(RELT)	6.61925	7.45912		ENSG00000092969(TGFB2)	31.2228	8.5255	13.1132	9.33509		ENSG00000076555(ACACB)	1.73929	3.65715
ENSG00000054983(GALC)	18.3649	14.8336		ENSG00000093009(CDC45)	23.0439	27.416	17.7343	2.929		ENSG00000076641(PAG1)	0.304246	1.9692
ENSG00000055044(NOP58)	59.2452	66.1994		ENSG00000093134(VNN3)	0.248276	9.96035	0	1.03145		ENSG00000076716(GPC4)	0	0
ENSG00000055070(SZRD1)	67.538	69.3664		ENSG00000093183(SEC22C)	11.5054	7.13455	20.1282	6.97363		ENSG00000076770(MBNL3)	23.3593	5.12841
ENSG00000055118(KCNH2)	1.08811	0.732899		ENSG00000094631(HDAC6)	25.0762	15.5581	13.5083	15.7007		ENSG00000076826(CAMSAP3)	1.1293	3.58747
ENSG00000055130(CUL1)	25.0091	23.8388		ENSG00000094755(GABRP)	6.80494	0.0812103	0	0		ENSG00000076864(RAP1GAP)	4.9575	3.32328
ENSG00000055147(FAM114A2)	6.69628	4.72481		ENSG00000094804(CDC6)	15.7844	21.0385	29.4209	5.40074		ENSG00000077044(DGKD)	35.4989	15.5542
ENSG00000055163(CYFIP2)	7.10565	7.78153		ENSG00000094841(UPRT)	5.83922	1.66671	5.21023	3.40841		ENSG00000077092(RARB)	0.0385876	0.208448
ENSG00000055208(TAB2)	20.7992	19.2321		ENSG00000094880(CDC23)	20.5987	12.5661	28.56	13.8357		ENSG00000077097(TOP2B)	30.8065	11.476
ENSG00000055211(GINM1)	25.3998	34.3953		ENSG00000094916(CBX5)	38.7086	28.9217	30.3587	12.8567		ENSG00000077147(TM9SF3)	59.6464	18.4285
ENSG00000055332(EIF2AK2)	28.1109	15.4735		ENSG00000094963(FMO2)	1.03859	0.0766912	0	0		ENSG00000077150(NFKB2)	60.44	179.938
ENSG00000055483(USP36)	21.7408	20.2459		ENSG00000095066(HOOK2)	36.3016	29.3903	5.27282	7.36254		ENSG00000077152(UBE2T)	78.017	90.2841
ENSG00000055609(KMT2C)	13.7541	17.0739		ENSG00000095209(TMEM38B)	12.0808	10.6877	18.3686	6.70622		ENSG00000077238(IL4R)	14.0647	26.6676
ENSG00000055732(MCOLN3)	1.79819	1.71593		ENSG00000095261(PSMD5)	23.5795	10.1883	30.7494	10.0635		ENSG00000077264(PAK3)	0.00681977	0.0129945
ENSG00000055813(CCDC85A)	0.96124	0.888344		ENSG00000095303(PTGS1)	3.52933	0.169523	0.099142	0.325826		ENSG00000077380(DYNC1I2)	43.1641	27.4098
ENSG00000055917(PUM2)	46.8238	31.8892		ENSG00000095319(NUP188)	16.8746	14.6489	25.4935	7.85227		ENSG00000077420(APBB1IP)	0.52038	0.764282
ENSG00000055950(MRPL43)	48.4819	53.2894		ENSG00000095370(SH2D3C)	0.105952	0.074582	0	2.47429		ENSG00000077454(LRCH4)	9.38857	10.974
ENSG00000055955(ITIH4)	5.32045	4.02384		ENSG00000095383(TBC1D2)	6.90224	15.6814	21.3239	36.8706		ENSG00000077463(SIRT6)	19.986	55.3429
ENSG00000056050(HPF1)	10.9192	7.6725		ENSG00000095397(WHRN)	2.88969	4.45033	0.616833	4.11098		ENSG00000077684(JADE1)	21.3318	12.9422
ENSG00000056097(ZFR)	40.9942	39.9815		ENSG00000095539(SEMA4G)	0.879807	0.125223	15.7031	29.2538		ENSG00000077713(SLC25A43)	8.91803	4.30173
ENSG00000056277(ZNF280C)	3.21352	3.67078		ENSG00000095637(SORBS1)	17.2661	12.2091	0.326998	1.4061		ENSG00000078018(MAP2)	1.8094	1.9638
ENSG00000056487(PHF21B)	0.489343	0.595315		ENSG00000095713(CRTAC1)	0.0222885	0.0241023	0.0471606	0.640842		ENSG00000078053(AMPH)	0	0
ENSG00000056558(TRAF1)	0.251549	0.227844		ENSG00000095739(BAMBI)	9.8221	31.6405	29.5849	89.2116		ENSG00000078081(LAMP3)	2.17757	0.710323
ENSG00000056586(RC3H2)	17.373	7.84819		ENSG00000095752(IL11)	0.699852	2.02758	9.19101	1.04495		ENSG00000078098(FAP)	11.2237	9.99459
ENSG00000056736(IL17RB)	3.45603	2.71973		ENSG00000096006(CRISP3)	5.48861	1.04853	0.567148	1.81429		ENSG00000078177(N4BP2)	1.92914	2.1549
ENSG00000056972(TRAF3IP2)	15.3628	15.627		ENSG00000096070(BRPF3)	20.4577	25.9858	4.04325	1.15392		ENSG00000078237(TIGAR)	9.83849	11.423
ENSG00000056998(GYG2)	1.2628	0.870963		ENSG00000096401(CDC5L)	32.0916	13.781	13.8153	6.99806		ENSG00000078401(EDN1)	5.12221	4.70214
ENSG00000057019(DCBLD2)	6.28307	4.82952		ENSG00000096433(ITPR3)	33.6227	107.761	33.1365	34.8574		ENSG00000078596(ITM2A)	0	0
ENSG00000057252(SOAT1)	5.3322	4.30255		ENSG00000096696(DSP)	112.926	39.297	31.5438	20.5389		ENSG00000078668(VDAC3)	79.4914	60.3569
ENSG00000057294(PKP2)	6.38799	6.45163		ENSG00000096968(JAK2)	3.25987	2.15353	7.64282	5.82843		ENSG00000078804(TP53INP2)	1.89858	3.14578
ENSG00000057593(F7)	0.273259	0.666188		ENSG00000097021(ACOT7)	23.741	75.0555	50.2322	122.672		ENSG00000078898(BPIFB2)	0	0
ENSG00000057608(GDI2)	158.435	168.447		ENSG00000097096(SYDE2)	5.16247	3.62797	1.31053	1.06277		ENSG00000078900(TP73)	0.0729924	1.07574
ENSG00000057663(ATG5)	19.7956	22.9333		ENSG00000099139(PCSK5)	0	0	0.190356	0.45487		ENSG00000078967(UBE2D4)	8.4345	6.6196
ENSG00000057704(TMCC3)	0.50837	0.467199		ENSG00000099194(SCD)	483.807	150.769	170.671	125.425		ENSG00000079112(CDH17)	0.0213351	0.0669399
ENSG00000057757(PITHD1)	30.4856	41.0173		ENSG00000099219(ERMP1)	28.5804	5.82945	34.9324	17.4263		ENSG00000079150(FKBP7)	5.14687	5.87895
ENSG00000057935(MTA3)	25.0942	29.229		ENSG00000099256(PRTFDC1)	0	0.239314	17.3941	5.85394		ENSG00000079156(OSBPL6)	5.13636	8.53982
ENSG00000058056(USP13)	7.61916	4.1345		ENSG00000099260(PALMD)	14.6644	36.6311	0.710331	2.81832		ENSG00000079215(SLC1A3)	25.1637	12.6195
ENSG00000058063(ATP11B)	6.76526	5.30872		ENSG00000099308(MAST3)	3.51658	3.21787	1.12302	2.37983		ENSG00000079257(LXN)	68.1717	21.535
ENSG00000058085(LAMC2)	0.992759	1.10846		ENSG00000099330(OCEL1)	10.0831	13.5066	6.48592	23.3983		ENSG00000079263(SP140)	0.0758163	3.20323
ENSG00000058262(SEC61A1)	109.609	128.983		ENSG00000099365(STX1B)	0.0522949	0.0114554	0.578867	0.895334		ENSG00000079308(TNS1)	21.5438	14.1218
ENSG00000058272(PPP1R12A)	25.8959	24.2018		ENSG00000099617(EFNA2)	0.234332	1.74531	2.16681	1.68969		ENSG00000079335(CDC14A)	2.49556	0.949338
ENSG00000058404(CAMK2B)	2.15183	2.43346		ENSG00000099785(MARCH2)	13.146	3.63392	8.27643	9.63763		ENSG00000079337(RAPGEF3)	1.58752	2.80452
ENSG00000058453(CROCC)	3.29351	2.38034		ENSG00000099810(MTAP)	24.3247	21.6671	7.31133	15.5453		ENSG00000079385(CEACAM1)	1.31233	10.6689
ENSG00000058600(POLR3E)	15.5914	19.1809		ENSG00000099812(MISP)	0	0.19586	65.4484	41.1633		ENSG00000079387(SENP1)	14.7014	7.7149
ENSG00000058668(ATP2B4)	5.08787	3.47507		ENSG00000099814(CEP170B)	10.5826	28.8153	20.1526	15.33		ENSG00000079435(LIPE)	0.265694	0.23623
ENSG00000058673(ZC3H11A)	51.8797	43.1502		ENSG00000099840(IZUMO4)	0.54051	1.65213	0	2.57951		ENSG00000079459(FDFT1)	98.7714	150.991
ENSG00000058729(RIOK2)	11.3453	14.018		ENSG00000099889(ARVCF)	10.5488	10.4555	0.643477	2.86289		ENSG00000079462(PAFAH1B3)	19.9056	60.0292
ENSG00000058799(YIPF1)	10.1589	12.123		ENSG00000099956(SMARCB1)	56.6108	18.2925	29.0243	3.41201		ENSG00000079616(KIF22)	35.9394	54.7125
ENSG00000058804(NDC1)	19.0593	17.3812		ENSG00000099968(BCL2L13)	24.0354	8.93091	16.2109	12.4986		ENSG00000079691(CARMIL1)	14.3727	3.82412
ENSG00000059122(FLYWCH1)	16.5984	20.3487		ENSG00000099992(TBC1D10A)	15.7769	20.7683	11.5121	35.8434		ENSG00000079739(PGM1)	64.5934	59.3069
ENSG00000059145(UNKL)	14.7986	17.6802		ENSG00000100023(PPIL2)	13.7968	22.7438	10.7896	12.4354		ENSG00000079785(DDX1)	87.8564	56.5517
ENSG00000059378(PARP12)	12.0183	5.12211		ENSG00000100030(MAPK1)	38.1603	15.4653	26.5327	14.2969		ENSG00000079819(EPB41L2)	18.6881	20.5615
ENSG00000059573(ALDH18A1)	28.8283	30.4605		ENSG00000100031(GGT1)	10.1679	3.71301	51.4902	132.265		ENSG00000079931(MOXD1)	0.352178	0.209761
ENSG00000059588(TARBP1)	7.48548	5.93974		ENSG00000100056(DGCR14)	5.9857	25.7613	2.79959	12.0804		ENSG00000079999(KEAP1)	22.8963	28.2261
ENSG00000059691(GATB)	6.41143	6.15847		ENSG00000100092(SH3BP1)	14.4122	18.8752	0.495805	2.67444		ENSG00000080031(PTPRH)	0.302024	0
ENSG00000059728(MXD1)	39.7489	29.1586		ENSG00000100100(PIK3IP1)	8.1645	1.90676	0.0540992	2.47949		ENSG00000080200(CRYBG3)	2.98513	3.94476
ENSG00000059758(CDK17)	8.67099	7.88255		ENSG00000100116(GCAT)	32.2995	33.5644	5.92433	4.98861		ENSG00000080298(RFX3)	0.860669	0.180545
ENSG00000059769(DNAJC25)	45.5183	37.1382		ENSG00000100150(DEPDC5)	5.14752	13.0805	3.22071	4.52876		ENSG00000080371(RAB21)	5.83185	5.34729
ENSG00000059915(PSD)	0.948301	1.45855		ENSG00000100162(CENPM)	34.3448	54.7058	27.4202	3.15846		ENSG00000080493(SLC4A4)	0.0222335	0.100371
ENSG00000060069(CTDP1)	5.2588	5.3932		ENSG00000100167(SEPT3)	13.3598	33.5312	0.54122	1.27232		ENSG00000080546(SESN1)	4.08175	5.87901
ENSG00000060138(YBX3)	69.8961	82.1644		ENSG00000100170(SLC5A1)	3.20257	3.0184	0	0.0466976		ENSG00000080573(COL5A3)	0.123675	0.776977
ENSG00000060140(STYK1)	1.00448	1.16363		ENSG00000100216(TOMM22)	63.9847	31.0416	60.139	19.4815		ENSG00000080802(CNOT4)	8.59413	18.5848
ENSG00000060237(WNK1)	28.6288	20.0095		ENSG00000100219(XBP1)	127.173	34.2015	84.1826	59.9797		ENSG00000080819(CPOX)	8.61868	3.10126
ENSG00000060339(CCAR1)	28.4161	30.2249		ENSG00000100234(TIMP3)	8.22083	4.13399	0.436061	0.0349283		ENSG00000080823(MOK)	4.39137	7.19986
ENSG00000060491(OGFR)	58.0926	42.5102		ENSG00000100258(LMF2)	34.9023	94.9887	40.5261	47.4321		ENSG00000080839(RBL1)	7.242	4.61162
ENSG00000060642(PIGV)	9.0084	8.57798		ENSG00000100263(RHBDD3)	14.4423	41.5073	17.9668	19.7404		ENSG00000080986(NDC80)	28.5747	14.0766
ENSG00000060656(PTPRU)	8.95763	10.861		ENSG00000100281(HMGXB4)	14.6652	14.8441	8.63419	9.30666		ENSG00000081014(AP4E1)	10.1183	3.22868
ENSG00000060688(SNRNP40)	35.2226	27.7463		ENSG00000100284(TOM1)	17.74	31.2393	9.52655	35.0587		ENSG00000081019(RSBN1)	4.44567	1.94326
ENSG00000060749(QSER1)	11.3833	5.98592		ENSG00000100290(BIK)	7.81977	12.2645	0.544078	4.27393		ENSG00000081041(CXCL2)	21.3873	5.40719
ENSG00000060762(MPC1)	19.682	22.6664		ENSG00000100292(HMOX1)	12.1177	42.4313	20.7556	81.0669		ENSG00000081177(EXD2)	7.40803	3.44822
ENSG00000060971(ACAA1)	34.7931	35.8637		ENSG00000100299(ARSA)	10.8011	13.4226	13.2028	37.4196		ENSG00000081181(ARG2)	5.50524	9.67953
ENSG00000061273(HDAC7)	14.0865	11.4324		ENSG00000100302(RASD2)	7.44828	4.70712	0.501088	2.27856		ENSG00000081277(PKP1)	0.0937819	0.0310757
ENSG00000061455(PRDM6)	1.60185	1.13061		ENSG00000100307(CBX7)	3.6476	1.82162	0.98997	4.69924		ENSG00000081377(CDC14B)	4.89776	2.46476
ENSG00000061656(SPAG4)	2.20985	3.74819		ENSG00000100311(PDGFB)	12.541	7.49462	1.34543	4.02174		ENSG00000081479(LRP2)	0.113385	0.0789416
ENSG00000061676(NCKAP1)	52.3721	48.501		ENSG00000100336(APOL4)	1.86201	1.74209	0.752908	3.54063		ENSG00000081665(ZNF506)	0.180909	0.368332
ENSG00000061794(MRPS35)	47.0269	55.452		ENSG00000100342(APOL1)	4.32633	8.24889	46.3519	168.773		ENSG00000081760(AACS)	12.0873	9.10164
ENSG00000061936(SFSWAP)	15.5177	15.7138		ENSG00000100344(PNPLA3)	7.62985	8.2289	0.0970613	0.197337		ENSG00000081803(CADPS2)	0	0
ENSG00000061938(TNK2)	13.8997	10.3239		ENSG00000100346(CACNA1I)	0.0539978	0.0627515	0.0269178	0.693859		ENSG00000081923(ATP8B1)	0.947155	0.553959
ENSG00000061987(MON2)	18.2285	17.4945		ENSG00000100351(GRAP2)	1.57448	0.350718	0	0.0156294		ENSG00000082146(STRADB)	7.8961	8.70734
ENSG00000062038(CDH3)	17.3714	22.0528		ENSG00000100417(PMM1)	21.6513	64.779	22.9626	45.8724		ENSG00000082153(BZW1)	404.806	64.5771
ENSG00000062194(GPBP1)	33.3831	35.1712		ENSG00000100422(CERK)	15.3136	9.92208	15.6371	9.43406		ENSG00000082175(PGR)	0	0.0139977
ENSG00000062282(DGAT2)	9.23238	7.31428		ENSG00000100478(AP4S1)	2.051	0.768447	4.98685	0.571547		ENSG00000082212(ME2)	27.192	7.7703
ENSG00000062370(ZNF112)	1.24798	0.968876		ENSG00000100479(POLE2)	8.76239	6.65185	14.295	2.14455		ENSG00000082482(KCNK2)	0	0
ENSG00000062485(CS)	222.106	233.294		ENSG00000100504(PYGL)	3.87458	0.874006	21.1583	49.6988		ENSG00000082497(SERTAD4)	10.4151	6.02895
ENSG00000062582(MRPS24)	112.771	143.131		ENSG00000100505(TRIM9)	0.161313	0.365729	1.93521	3.03234		ENSG00000082512(TRAF5)	22.3709	12.4144
ENSG00000062598(ELMO2)	10.9166	10.456		ENSG00000100522(GNPNAT1)	35.3857	21.5014	42.0334	13.1328		ENSG00000082641(NFE2L1)	56.3951	136.416
ENSG00000062650(WAPL)	17.2862	13.927		ENSG00000100526(CDKN3)	62.6755	56.4073	59.3263	22.5447		ENSG00000082781(ITGB5)	75.0313	47.1338
ENSG00000062716(VMP1)	135.236	134.261		ENSG00000100528(CNIH1)	58.4429	13.2959	154.671	43.1752		ENSG00000082898(XPO1)	106.537	40.3111
ENSG00000062725(APPBP2)	176.047	131.458		ENSG00000100558(PLEK2)	2.63638	3.8474	7.42993	4.25788		ENSG00000083099(LYRM2)	11.8888	10.7153
ENSG00000062822(POLD1)	25.2164	20.5567		ENSG00000100578(KIAA0586)	9.51132	5.70085	8.06343	3.59553		ENSG00000083290(ULK2)	2.5797	0.520795
ENSG00000063046(EIF4B)	290.307	270.254		ENSG00000100592(DAAM1)	18.359	14.6886	3.8946	5.49263		ENSG00000083454(P2RX5)	15.5204	29.6845
ENSG00000063127(SLC6A16)	0.329604	0.550406		ENSG00000100612(DHRS7)	12.4467	30.2893	53.5338	194.441		ENSG00000083520(DIS3)	16.8506	9.32897
ENSG00000063169(GLTSCR1)	13.8332	10.5651		ENSG00000100626(GALNT16)	0.144532	3.85184	0.137325	0.601932		ENSG00000083544(TDRD3)	7.78785	2.88311
ENSG00000063176(SPHK2)	8.51955	12.3314		ENSG00000100628(ASB2)	0.465222	0.787447	0	0.127938		ENSG00000083720(OXCT1)	43.4968	31.191
ENSG00000063177(RPL18)	1117.78	1352.3		ENSG00000100629(CEP128)	7.35634	2.65779	3.89051	0.906845		ENSG00000083799(CYLD)	9.93195	10.8704
ENSG00000063180(CA11)	0.259295	0.814139		ENSG00000100644(HIF1A)	50.7891	14.7035	143.26	87.2939		ENSG00000083817(ZNF416)	2.39617	5.71494
ENSG00000063241(ISOC2)	71.6728	85.6999		ENSG00000100647(SUSD6)	10.7249	6.34906	5.01322	9.27495		ENSG00000083845(RPS5)	784.426	1307.6
ENSG00000063244(U2AF2)	173.642	143.596		ENSG00000100664(EIF5)	106.136	53.8502	157.704	57.7695		ENSG00000083857(FAT1)	4.91249	3.34972
ENSG00000063245(EPN1)	65.0022	69.0606		ENSG00000100665(SERPINA4)	0.0507036	0.107226	0.0855567	1.80598		ENSG00000084073(ZMPSTE24)	39.2349	19.8861
ENSG00000063322(MED29)	17.8755	17.2323		ENSG00000100739(BDKRB1)	0.450064	0.267671	11.1175	48.2678		ENSG00000084090(STARD7)	47.0755	30.2357
ENSG00000063438(AHRR)	90.7297	83.2483		ENSG00000100744(GSKIP)	12.5321	3.13974	24.3297	10.2721		ENSG00000084093(REST)	10.3392	4.5067
ENSG00000063587(ZNF275)	4.83678	5.01745		ENSG00000100749(VRK1)	13.087	7.90924	17.707	3.92839		ENSG00000084110(HAL)	0.0473843	0
ENSG00000063601(MTMR1)	15.3149	15.8415		ENSG00000100764(PSMC1)	31.2937	17.0693	79.8514	22.2086		ENSG00000084112(SSH1)	6.13962	4.2686
ENSG00000063660(GPC1)	23.3719	19.9057		ENSG00000100852(ARHGAP5)	35.917	22.4628	32.7505	33.2047		ENSG00000084207(GSTP1)	267.942	452.276
ENSG00000063761(ADCK1)	5.62045	5.70894		ENSG00000100867(DHRS2)	1.33644	4.94602	1.45355	16.5675		ENSG00000084234(APLP2)	93.4307	41.9959
ENSG00000063854(HAGH)	30.2116	28.0693		ENSG00000100889(PCK2)	28.3311	39.0263	14.6045	27.8855		ENSG00000084444(FAM234B)	4.08418	6.16772
ENSG00000063978(RNF4)	21.3038	17.9051		ENSG00000100897(DCAF11)	48.55	15.5628	17.6372	5.8357		ENSG00000084628(NKAIN1)	0.213121	0.202495
ENSG00000064012(CASP8)	6.67321	8.72236		ENSG00000100906(NFKBIA)	17.1014	25.1608	65.466	254.084		ENSG00000084636(COL16A1)	1.52251	4.59945
ENSG00000064042(LIMCH1)	3.70321	7.22811		ENSG00000100916(BRMS1L)	5.85264	6.37997	6.51274	4.10962		ENSG00000084674(APOB)	0.0192773	0
ENSG00000064102(INTS13)	20.5469	16.7157		ENSG00000100918(REC8)	1.56919	0.468306	1.11684	3.71867		ENSG00000084710(EFR3B)	1.18234	1.73076
ENSG00000064115(TM7SF3)	72.0905	51.6064		ENSG00000100949(RABGGTA)	19.6038	22.5376	10.5974	11.8547		ENSG00000084731(KIF3C)	2.06211	8.6861
ENSG00000064195(DLX3)	7.23115	3.16119		ENSG00000100968(NFATC4)	4.17699	1.74168	0.138692	0.909343		ENSG00000084764(MAPRE3)	4.35397	10.9188
ENSG00000064199(SPA17)	5.22464	3.16417		ENSG00000101000(PROCR)	0.20374	0.390701	35.2379	96.2041		ENSG00000084774(CAD)	28.0932	12.1197
ENSG00000064205(WISP2)	64.5213	62.1425		ENSG00000101003(GINS1)	11.8076	9.41133	42.1598	8.03317		ENSG00000085063(CD59)	346.475	237.449
ENSG00000064270(ATP2C2)	13.0357	13.5727		ENSG00000101017(CD40)	0	0	0.618906	5.02831		ENSG00000085117(CD82)	8.89365	11.246
ENSG00000064300(NGFR)	0.337336	0.491828		ENSG00000101049(SGK2)	1.69439	0.202853	8.93869	2.59439		ENSG00000085276(MECOM)	2.35928	4.46617
ENSG00000064309(CDON)	4.41549	0.923207		ENSG00000101057(MYBL2)	46.5911	179.012	57.9503	12.6085		ENSG00000085365(SCAMP1)	19.0508	3.12269
ENSG00000064313(TAF2)	33.9721	25.8463		ENSG00000101096(NFATC2)	2.99318	2.88092	0.480093	0.474127		ENSG00000085415(SEH1L)	29.4676	23.8512
ENSG00000064393(HIPK2)	4.16127	3.25544		ENSG00000101158(NELFCD)	30.6117	16.5809	28.3271	7.57349		ENSG00000085449(WDFY1)	12.0867	6.13417
ENSG00000064419(TNPO3)	34.4256	33.2017		ENSG00000101187(SLCO4A1)	7.17687	8.28663	11.5378	36.9662		ENSG00000085465(OVGP1)	0.209308	0.871804
ENSG00000064489(BORCS8-MEF2B)	16.0594	18.1752		ENSG00000101230(ISM1)	0.0508229	0.178553	0.355735	0.778806		ENSG00000085514(PILRA)	15.2367	23.1295
ENSG00000064490(RFXANK)	29.4403	42.7247		ENSG00000101276(SLC52A3)	14.888	12.8544	0.928312	9.24287		ENSG00000085552(IGSF9)	0.0168624	0.0474766
ENSG00000064545(TMEM161A)	18.1769	27.2882		ENSG00000101307(SIRPB1)	0.106569	0.989771	0.167156	0.750428		ENSG00000085563(ABCB1)	2.82821	4.72578
ENSG00000064547(LPAR2)	32.2648	36.7741		ENSG00000101311(FERMT1)	1.08946	0.434934	7.51568	7.31137		ENSG00000085662(AKR1B1)	459.222	857.932
ENSG00000064601(CTSA)	68.3638	91.4781		ENSG00000101331(CCM2L)	0.488412	0.715437	0	0		ENSG00000085719(CPNE3)	20.7421	4.6005
ENSG00000064607(SUGP2)	21.117	19.2702		ENSG00000101335(MYL9)	0	0.0138953	0	0.0208688		ENSG00000085741(WNT11)	0.251334	1.78662
ENSG00000064651(SLC12A2)	50.6863	63.9239		ENSG00000101346(POFUT1)	15.3963	6.07382	35.9229	8.63137		ENSG00000085788(DDHD2)	21.3659	15.9868
ENSG00000064652(SNX24)	34.4503	31.8824		ENSG00000101347(SAMHD1)	7.97548	4.27215	6.46278	12.3142		ENSG00000085840(ORC1)	14.8475	39.5472
ENSG00000064655(EYA2)	1.81088	1.52305		ENSG00000101367(MAPRE1)	72.4689	35.4615	110.142	29.7588		ENSG00000085978(ATG16L1)	10.3644	13.3448
ENSG00000064666(CNN2)	20.826	20.1454		ENSG00000101412(E2F1)	22.4941	49.3735	34.9426	10.7895		ENSG00000085982(USP40)	6.50104	2.09447
ENSG00000064687(ABCA7)	2.7456	4.87486		ENSG00000101447(FAM83D)	58.8564	33.9952	43.8882	4.39234		ENSG00000085999(RAD54L)	13.0677	9.86738
ENSG00000064703(DDX20)	10.2317	9.34004		ENSG00000101460(MAP1LC3A)	0	0	2.01682	21.6833		ENSG00000086062(B4GALT1)	217.835	42.1984
ENSG00000064726(BTBD1)	42.5682	39.2359		ENSG00000101493(ZNF516)	2.58789	3.47652	0.611935	3.21376		ENSG00000086065(CHMP5)	81.1594	13.8516
ENSG00000064763(FAR2)	1.16459	1.92719		ENSG00000101558(VAPA)	119.749	18.5851	50.3523	11.2274		ENSG00000086200(IPO11)	8.01706	3.36492
ENSG00000064787(BCAS1)	8.49976	11.4747		ENSG00000101596(SMCHD1)	34.1352	31.559	10.6587	6.24959		ENSG00000086288(NME8)	31.3777	28.6682
ENSG00000064932(SBNO2)	23.0002	22.8074		ENSG00000101639(CEP192)	23.0817	32.487	5.41463	4.25502		ENSG00000086300(SNX10)	6.57529	10.9713
ENSG00000064933(PMS1)	9.32217	9.56198		ENSG00000101670(LIPG)	23.6498	23.5142	0.610808	1.65218		ENSG00000086475(SEPHS1)	25.2844	29.9931
ENSG00000064961(HMG20B)	86.322	74.0532		ENSG00000101843(PSMD10)	56.9433	13.5779	69.0745	29.5997		ENSG00000086506(HBQ1)	0	0
ENSG00000064995(TAF11)	30.1116	23.6931		ENSG00000101846(STS)	20.6398	7.16645	6.71776	6.42673		ENSG00000086544(ITPKC)	3.00917	5.6879
ENSG00000064999(ANKS1A)	10.9466	9.71121		ENSG00000101856(PGRMC1)	136.553	22.8602	90.5322	32.9466		ENSG00000086548(CEACAM6)	0.0348125	0
ENSG00000065000(AP3D1)	32.1354	30.776		ENSG00000101868(POLA1)	17.9134	10.6809	16.4352	3.67197		ENSG00000086598(TMED2)	130.011	47.9573
ENSG00000065029(ZNF76)	10.385	10.1066		ENSG00000101871(MID1)	17.6464	12.7449	51.6227	33.5004		ENSG00000086696(HSD17B2)	0	0
ENSG00000065054(SLC9A3R2)	47.9426	49.6824		ENSG00000101888(NXT2)	16.2267	5.0719	13.5399	5.07306		ENSG00000086717(PPEF1)	2.58073	0.392693
ENSG00000065057(NTHL1)	17.2451	18.1521		ENSG00000101945(SUV39H1)	6.2002	10.7454	15.7408	2.55661		ENSG00000086730(LAT2)	0.730755	0.330458
ENSG00000065060(UHRF1BP1)	6.31121	5.6914		ENSG00000101955(SRPX)	0.0271321	0.218198	3.14355	5.87757		ENSG00000087008(ACOX3)	4.2733	7.97868
ENSG00000065135(GNAI3)	17.9655	16.034		ENSG00000101966(XIAP)	11.2904	5.65866	18.8989	10.5096		ENSG00000087053(MTMR2)	34.9995	18.4773
ENSG00000065150(IPO5)	31.0852	37.2881		ENSG00000101972(STAG2)	105.028	27.2281	74.9549	32.9194		ENSG00000087074(PPP1R15A)	31.3295	66.8436
ENSG00000065154(OAT)	29.9251	42.5592		ENSG00000101986(ABCD1)	10.8448	21.1368	2.54385	8.98029		ENSG00000087076(HSD17B14)	0	1.39677
ENSG00000065183(WDR3)	16.9761	15.7777		ENSG00000102003(SYP)	0.488791	9.23452	0.627707	2.75716		ENSG00000087085(ACHE)	0.0454364	0.431208
ENSG00000065243(PKN2)	12.4969	8.68649		ENSG00000102007(PLP2)	127.549	465.9	302.398	389.093		ENSG00000087086(FTL)	1431.1	3915.86
ENSG00000065268(WDR18)	25.5303	31.2287		ENSG00000102024(PLS3)	208.145	96.9837	210.335	49.5269		ENSG00000087087(SRRT)	26.8743	86.1176
ENSG00000065308(TRAM2)	9.08904	7.42904		ENSG00000102038(SMARCA1)	5.6172	2.11767	13.9218	21.0039		ENSG00000087111(PIGS)	29.7529	8.28889
ENSG00000065320(NTN1)	1.8515	1.54037		ENSG00000102048(ASB9)	0.677464	0.167511	7.2658	0.523001		ENSG00000087116(ADAMTS2)	0.219938	0.0626359
ENSG00000065328(MCM10)	11.3911	9.01042		ENSG00000102053(ZC3H12B)	0.330831	0.252977	0.298689	0.276884		ENSG00000087128(TMPRSS11E)	0	0
ENSG00000065357(DGKA)	1.4906	3.71851		ENSG00000102057(KCND1)	0.411228	0.746508	0.300881	2.46156		ENSG00000087253(LPCAT2)	5.79165	5.67685
ENSG00000065361(ERBB3)	223.361	217.74		ENSG00000102158(MAGT1)	37.2734	14.803	77.2443	26.4355		ENSG00000087258(GNAO1)	0.961978	2.09183
ENSG00000065413(ANKRD44)	1.78223	0.997839		ENSG00000102174(PHEX)	4.547	0.648163	1.04736	0.331169		ENSG00000087266(SH3BP2)	19.4765	26.8752
ENSG00000065427(KARS)	123.161	142.036		ENSG00000102218(RP2)	9.79931	6.96355	14.2273	12.088		ENSG00000087494(PTHLH)	0.146216	0.136688
ENSG00000065457(ADAT1)	22.4226	16.9721		ENSG00000102221(JADE3)	10.8205	11.0311	7.66185	4.41266		ENSG00000087586(AURKA)	73.0047	32.0552
ENSG00000065485(PDIA5)	11.4202	12.4761		ENSG00000102226(USP11)	14.7128	41.6643	21.5639	41.0904		ENSG00000087903(RFX2)	4.77987	6.84785
ENSG00000065491(TBC1D22B)	9.02785	6.69501		ENSG00000102243(VGLL1)	207.39	239.045	0	0		ENSG00000087995(METTL2A)	9.41701	5.60998
ENSG00000065518(NDUFB4)	135.193	192.092		ENSG00000102287(GABRE)	0.32585	0.254086	36.584	106.071		ENSG00000088002(SULT2B1)	0.0797421	0.511014
ENSG00000065526(SPEN)	13.8886	12.0982		ENSG00000102312(PORCN)	11.4029	7.68167	18.3375	27.3541		ENSG00000088035(ALG6)	6.29168	5.42143
ENSG00000065534(MYLK)	0.550822	0.56231		ENSG00000102349(KLF8)	12.5377	15.7818	0.0916062	0.86828		ENSG00000088038(CNOT3)	17.337	11.8362
ENSG00000065548(ZC3H15)	43.3887	58.5451		ENSG00000102359(SRPX2)	1.02129	0.963455	0.80485	1.37932		ENSG00000088205(DDX18)	27.6147	20.2262
ENSG00000065559(MAP2K4)	10.8338	7.18473		ENSG00000102384(CENPI)	11.6255	9.68746	15.7447	2.90658		ENSG00000088280(ASAP3)	0.800979	0.987704
ENSG00000065600(TMEM206)	3.20051	3.77167		ENSG00000102385(DRP2)	0.155179	0.0314024	0.453545	0.166213		ENSG00000088305(DNMT3B)	1.35725	1.08954
ENSG00000065613(SLK)	11.4014	10.768		ENSG00000102452(NALCN)	2.74305	2.90906	6.8181	1.40564		ENSG00000088325(TPX2)	57.2984	37.6537
ENSG00000065615(CYB5R4)	10.3211	9.11202		ENSG00000102471(NDFIP2)	46.8073	19.9529	16.3514	10.7427		ENSG00000088356(PDRG1)	11.0708	32.463
ENSG00000065621(GSTO2)	13.0709	20.5294		ENSG00000102547(CAB39L)	7.78138	2.73562	1.8389	1.30823		ENSG00000088386(SLC15A1)	0	0
ENSG00000065665(SEC61A2)	5.16257	4.21244		ENSG00000102580(DNAJC3)	18.0072	10.8171	31.1452	10.0833		ENSG00000088538(DOCK3)	0.0684483	0.181289
ENSG00000065717(TLE2)	8.36814	11.8068		ENSG00000102738(MRPS31)	9.19081	15.2798	7.65698	23.9398		ENSG00000088543(C3orf18)	2.26706	1.56912
ENSG00000065802(ASB1)	5.74596	6.97588		ENSG00000102743(SLC25A15)	7.10096	3.16096	11.703	2.97242		ENSG00000088756(ARHGAP28)	1.31735	0.143818
ENSG00000065809(FAM107B)	9.87077	8.2054		ENSG00000102753(KPNA3)	18.5446	6.75421	20.0307	4.78489		ENSG00000088766(CRLS1)	51.0575	11.7567
ENSG00000065833(ME1)	28.3365	36.942		ENSG00000102760(RGCC)	10.5906	7.00999	0.30871	8.75824		ENSG00000088826(SMOX)	45.0355	29.2187
ENSG00000065882(TBC1D1)	10.2534	14.1813		ENSG00000102780(DGKH)	6.08223	17.6252	1.87204	4.87431		ENSG00000088836(SLC4A11)	0.690929	0.744535
ENSG00000065883(CDK13)	13.3318	13.2941		ENSG00000102781(KATNAL1)	2.42671	4.84622	5.14286	4.12497		ENSG00000088854(C20orf194)	1.91828	3.28727
ENSG00000065911(MTHFD2)	77.0015	84.755		ENSG00000102837(OLFM4)	14.5452	2.18107	0	0		ENSG00000088899(LZTS3)	2.6317	6.21868
ENSG00000065923(SLC9A7)	11.2678	12.9515		ENSG00000102879(CORO1A)	7.34039	13.3117	0.929453	6.23667		ENSG00000088930(XRN2)	47.7537	14.1409
ENSG00000065970(FOXJ2)	7.80849	5.08353		ENSG00000102886(GDPD3)	1.88886	3.18945	0.0585003	0.591631		ENSG00000088970(KIZ)	10.5213	5.01974
ENSG00000065978(YBX1)	464.707	545.82		ENSG00000102893(PHKB)	49.7065	12.6796	32.4483	13.2992		ENSG00000088992(TESC)	6.92601	5.78757
ENSG00000065989(PDE4A)	0.455519	0.433948		ENSG00000102935(ZNF423)	0	0	0.0316519	0.680232		ENSG00000089057(SLC23A2)	4.87297	7.65612
ENSG00000066027(PPP2R5A)	25.9032	19.4147		ENSG00000102962(CCL22)	10.4212	3.17274	4.03778	5.43691		ENSG00000089060(SLC8B1)	18.2986	42.9055
ENSG00000066044(ELAVL1)	47.5112	48.4273		ENSG00000102967(DHODH)	2.53189	5.32146	7.9301	5.16482		ENSG00000089063(TMEM230)	43.0743	7.6841
ENSG00000066084(DIP2B)	41.5119	38.2024		ENSG00000102974(CTCF)	14.3773	11.5814	20.6925	8.34057		ENSG00000089091(DZANK1)	0.568746	0.468537
ENSG00000066117(SMARCD1)	33.8771	34.9743		ENSG00000102981(PARD6A)	6.65587	21.2903	3.10908	2.23921		ENSG00000089116(LHX5)	0	0.0411577
ENSG00000066135(KDM4A)	16.4662	19.7344		ENSG00000103034(NDRG4)	0.451911	2.02033	1.43787	6.09508		ENSG00000089123(TASP1)	5.33842	3.59768
ENSG00000066136(NFYC)	20.2304	19.1184		ENSG00000103044(HAS3)	0.506028	3.53058	18.5955	19.9802		ENSG00000089127(OAS1)	152.203	78.7819
ENSG00000066248(NGEF)	1.09055	1.50676		ENSG00000103089(FA2H)	17.3166	38.1238	54.2854	137.795		ENSG00000089163(SIRT4)	1.37264	3.98211
ENSG00000066279(ASPM)	14.5911	8.60637		ENSG00000103150(MLYCD)	6.74468	10.6201	43.6366	4.84706		ENSG00000089195(TRMT6)	14.2717	30.5813
ENSG00000066322(ELOVL1)	74.4971	90.2228		ENSG00000103187(COTL1)	60.5836	95.4559	236.739	40.998		ENSG00000089199(CHGB)	0	0
ENSG00000066379(ZNRD1)	22.1631	18.4208		ENSG00000103227(LMF1)	1.42741	5.56248	8.4472	41.9839		ENSG00000089248(ERP29)	93.7136	196.65
ENSG00000066382(MPPED2)	1.22274	1.02456		ENSG00000103257(SLC7A5)	71.1221	153.857	515.539	66.9834		ENSG00000089327(FXYD5)	127.677	205.194
ENSG00000066422(ZBTB11)	18.0445	13.3383		ENSG00000103269(RHBDL1)	0.352919	1.05782	0.38138	1.92516		ENSG00000089335(ZNF302)	0.146734	0
ENSG00000066427(ATXN3)	33.2428	30.9565		ENSG00000103313(MEFV)	0.102253	0	0.0448857	0.877991		ENSG00000089685(BIRC5)	44.0088	18.8575
ENSG00000066455(GOLGA5)	23.1568	30.4759		ENSG00000103316(CRYM)	0.162715	0.257904	0.525293	4.41077		ENSG00000089818(NECAP1)	22.6677	18.3425
ENSG00000066468(FGFR2)	3.35911	2.00459		ENSG00000103363(ELOB)	87.3546	143.348	278.011	514.028		ENSG00000089820(ARHGAP4)	0.346584	0.451576
ENSG00000066557(LRRC40)	8.86597	6.08545		ENSG00000103479(RBL2)	32.8315	10.7862	12.4821	7.98102		ENSG00000089847(ANKRD24)	0.0553027	0.523069
ENSG00000066583(ISOC1)	116.829	107.741		ENSG00000103485(QPRT)	74.5628	73.4197	0	0.0268074		ENSG00000089902(RCOR1)	23.899	12.8081
ENSG00000066629(EML1)	7.30586	3.93041		ENSG00000103490(PYCARD)	5.78977	3.90818	2.18314	8.16088		ENSG00000090020(SLC9A1)	7.38237	20.7616
ENSG00000066651(TRMT11)	5.86445	7.89348		ENSG00000103494(RPGRIP1L)	8.13013	5.05522	6.09156	2.58327		ENSG00000090060(PAPOLA)	49.6097	19.3102
ENSG00000066654(THUMPD1)	16.243	10.4279		ENSG00000103522(IL21R)	0	0	0	0.0670587		ENSG00000090061(CCNK)	18.518	7.27827
ENSG00000066697(MSANTD3)	10.5209	15.2164		ENSG00000103534(TMC5)	3.47684	0.734213	4.78349	6.94763		ENSG00000090238(YPEL3)	13.1874	12.2352
ENSG00000066735(KIF26A)	8.14097	3.48644		ENSG00000103540(CCP110)	8.3749	9.78035	7.76748	4.97408		ENSG00000090263(MRPS33)	9.40125	5.0386
ENSG00000066739(ATG2B)	8.13945	4.34996		ENSG00000103546(SLC6A2)	1.69491	8.08533	0	0		ENSG00000090339(ICAM1)	3.0237	10.358
ENSG00000066777(ARFGEF1)	17.7848	15.309		ENSG00000103569(AQP9)	0	0.0201965	0	0.70531		ENSG00000090376(IRAK3)	0.0281173	0.0288225
ENSG00000066827(ZFAT)	2.60783	2.15035		ENSG00000103647(CORO2B)	0	0.0284902	0.411185	0.313226		ENSG00000090539(CHRD)	0.0898091	0.0694769
ENSG00000066855(MTFR1)	29.4435	28.7754		ENSG00000103723(AP3B2)	0.566785	4.37724	0.161954	0.626972		ENSG00000090554(FLT3LG)	1.36675	2.84108
ENSG00000066926(FECH)	16.7581	12.5002		ENSG00000103742(IGDCC4)	0.0562725	0.0477798	3.44903	2.4578		ENSG00000090621(PABPC4)	74.6726	30.2321
ENSG00000066933(MYO9A)	5.91722	4.89002		ENSG00000103855(CD276)	12.3772	20.7316	31.7487	66.5273		ENSG00000090661(CERS4)	0.178209	0.0566305
ENSG00000067057(PFKP)	85.2894	97.7122		ENSG00000103888(CEMIP)	0.206699	0.0134155	3.86002	143.798		ENSG00000090776(EFNB1)	1.87324	7.69865
ENSG00000067064(IDI1)	83.8415	50.3583		ENSG00000103966(EHD4)	4.68758	3.29618	5.06123	7.04282		ENSG00000090861(AARS)	120.274	181.187
ENSG00000067066(SP100)	9.45848	3.18756		ENSG00000103978(TMEM87A)	31.6616	12.8458	24.5373	10.8994		ENSG00000090889(KIF4A)	13.9619	11.3969
ENSG00000067082(KLF6)	13.6398	7.72905		ENSG00000104043(ATP8B4)	0.125451	0.36437	2.25116	5.45468		ENSG00000090971(NAT14)	13.2017	30.9616
ENSG00000067113(PLPP1)	5.43797	4.05308		ENSG00000104059(FAM189A1)	0	0	0.76584	2.04304		ENSG00000090975(PITPNM2)	4.37061	6.10995
ENSG00000067141(NEO1)	12.8952	8.66374		ENSG00000104067(TJP1)	14.6704	8.12026	46.3529	26.8148		ENSG00000091039(OSBPL8)	27.7415	9.2745
ENSG00000067167(TRAM1)	76.0042	67.7359		ENSG00000104081(BMF)	8.463	9.70885	0.155382	4.49139		ENSG00000091127(PUS7)	16.3952	8.06255
ENSG00000067177(PHKA1)	7.47546	8.728		ENSG00000104140(RHOV)	13.5442	28.3695	51.6738	146.364		ENSG00000091129(NRCAM)	1.06672	0.403243
ENSG00000067182(TNFRSF1A)	50.4626	72.5218		ENSG00000104147(OIP5)	13.792	2.92761	19.8099	1.18757		ENSG00000091136(LAMB1)	44.8148	40.4133
ENSG00000067191(CACNB1)	1.13549	1.59355		ENSG00000104154(SLC30A4)	3.83841	3.92173	1.21485	2.66383		ENSG00000091140(DLD)	47.0037	11.1614
ENSG00000067208(EVI5)	1.54932	1.36968		ENSG00000104213(PDGFRL)	0.174944	0.0857591	5.90495	33.0756		ENSG00000091157(WDR7)	3.04295	2.39083
ENSG00000067221(STOML1)	4.42944	5.8826		ENSG00000104219(ZDHHC2)	0.0231067	0	12.0325	3.8675		ENSG00000091317(CMTM6)	20.2881	7.5327
ENSG00000067225(PKM)	697.807	940.946		ENSG00000104267(CA2)	0	0.176657	26.2129	16.0895		ENSG00000091409(ITGA6)	20.6316	9.08107
ENSG00000067248(DHX29)	15.8461	16.4716		ENSG00000104312(RIPK2)	9.09867	22.6532	9.50351	32.6189		ENSG00000091436(MAP3K20)	30.7699	9.13554
ENSG00000067365(METTL22)	9.64725	9.28916		ENSG00000104321(TRPA1)	0	0	5.42814	1.77322		ENSG00000091513(TF)	0.0512226	0
ENSG00000067369(TP53BP1)	9.29499	9.31001		ENSG00000104327(CALB1)	0	0	0.792808	17.4669		ENSG00000091592(NLRP1)	0.13305	0.324509
ENSG00000067533(RRP15)	24.8477	15.4071		ENSG00000104331(IMPAD1)	18.1924	7.16873	53.9773	23.6414		ENSG00000091622(PITPNM3)	1.45641	3.02446
ENSG00000067560(RHOA)	163.792	89.1911		ENSG00000104332(SFRP1)	60.0181	21.2903	11.1124	4.04669		ENSG00000091651(ORC6)	24.1325	53.7949
ENSG00000067596(DHX8)	10.231	8.49875		ENSG00000104368(PLAT)	0.20957	0.145135	0.531181	13.3583		ENSG00000091656(ZFHX4)	0.029206	0.00668103
ENSG00000067606(PRKCZ)	15.9419	15.0171		ENSG00000104381(GDAP1)	0.79018	2.35992	5.11575	1.77947		ENSG00000091844(RGS17)	1.49556	1.15725
ENSG00000067704(IARS2)	49.8548	44.894		ENSG00000104412(EMC2)	25.1197	9.22819	29.8937	16.2034		ENSG00000092036(HAUS4)	72.4199	60.9512
ENSG00000067715(SYT1)	9.8075	15.3517		ENSG00000104419(NDRG1)	137.144	28.1596	10.3259	376.897		ENSG00000092068(SLC7A8)	0.989097	0.925586
ENSG00000067829(IDH3G)	63.2275	84.3059		ENSG00000104472(CHRAC1)	21.6393	30.0147	27.5601	17.2749		ENSG00000092094(OSGEP)	8.1668	31.94
ENSG00000067836(ROGDI)	19.6589	24.754		ENSG00000104490(NCALD)	5.09282	0.979546	8.03558	4.40231		ENSG00000092140(G2E3)	13.4929	3.70269
ENSG00000067840(PDZD4)	6.32571	4.68212		ENSG00000104524(PYCRL)	2.84108	2.10788	19.2583	11.0542		ENSG00000092295(TGM1)	2.60361	4.41205
ENSG00000067900(ROCK1)	19.5098	10.8098		ENSG00000104537(ANXA13)	0.0294191	0	10.9721	36.5912		ENSG00000092345(DAZL)	0	0
ENSG00000067955(CBFB)	23.0999	24.4589		ENSG00000104549(SQLE)	69.5285	73.4248	35.6257	26.1648		ENSG00000092421(SEMA6A)	0.0394517	0.353074
ENSG00000067992(PDK3)	17.4666	17.8628		ENSG00000104626(ERI1)	10.4164	9.4018	14.5945	11.6376		ENSG00000092439(TRPM7)	14.9328	19.2541
ENSG00000068001(HYAL2)	12.4086	12.3645		ENSG00000104635(SLC39A14)	11.0232	6.44446	38.3023	17.3238		ENSG00000092445(TYRO3)	9.88804	10.5813
ENSG00000068024(HDAC4)	16.2879	6.30872		ENSG00000104689(TNFRSF10A)	4.29997	17.7061	17.0702	32.9761		ENSG00000092470(WDR76)	22.4596	21.6764
ENSG00000068028(RASSF1)	7.20267	5.64577		ENSG00000104695(PPP2CB)	38.0407	11.4147	51.7344	24.9265		ENSG00000092529(CAPN3)	0.529899	0.366409
ENSG00000068078(FGFR3)	7.64854	2.52759		ENSG00000104722(NEFM)	0	0	0.0378923	0.65625		ENSG00000092607(TBX15)	0	0
ENSG00000068079(IFI35)	12.3296	8.63331		ENSG00000104738(MCM4)	47.1229	105.217	76.3672	20.8886		ENSG00000092621(PHGDH)	91.1531	124.277
ENSG00000068097(HEATR6)	78.0169	48.1559		ENSG00000104756(KCTD9)	22.3941	12.9737	29.4637	17.4622		ENSG00000092841(MYL6)	731.296	1732.82
ENSG00000068120(COASY)	30.6241	41.3613		ENSG00000104763(ASAH1)	61.9471	31.0497	55.8892	60.6761		ENSG00000092853(CLSPN)	15.3564	54.6257
ENSG00000068137(PLEKHH3)	18.6123	21.8337		ENSG00000104765(BNIP3L)	31.6988	19.7776	13.0305	58.5445		ENSG00000092929(UNC13D)	15.4348	44.7215
ENSG00000068305(MEF2A)	10.4661	9.23963		ENSG00000104783(KCNN4)	130.293	111.764	40.7456	133.206		ENSG00000092964(DPYSL2)	22.783	8.96135
ENSG00000068308(OTUD5)	14.6758	15.1289		ENSG00000104825(NFKBIB)	40.4605	123.593	38.5103	77.2126		ENSG00000092969(TGFB2)	2.4418	0.415024
ENSG00000068323(TFE3)	12.2065	16.6463		ENSG00000104833(TUBB4A)	0.161581	0.198259	3.38534	18.712		ENSG00000093000(NUP50)	31.7103	39.1524
ENSG00000068354(TBC1D25)	3.43487	4.64087		ENSG00000104870(FCGRT)	0	0.140758	9.90176	35.131		ENSG00000093009(CDC45)	19.8311	22.4959
ENSG00000068366(ACSL4)	0.557271	0.0569619		ENSG00000104872(PIH1D1)	72.3374	26.599	41.3334	41.1825		ENSG00000093010(COMT)	65.0967	84.5396
ENSG00000068383(INPP5A)	16.3007	14.9077		ENSG00000104881(PPP1R13L)	44.5485	46.0475	7.26827	49.6011		ENSG00000093134(VNN3)	0	0
ENSG00000068394(GPKOW)	15.8561	14.6037		ENSG00000104884(ERCC2)	15.4289	3.84164	9.00912	4.91381		ENSG00000093183(SEC22C)	20.0605	13.3764
ENSG00000068400(GRIPAP1)	15.826	21.7218		ENSG00000104888(SLC17A7)	0.194005	0.43943	0.0727884	0.972479		ENSG00000094631(HDAC6)	21.6184	13.7019
ENSG00000068438(FTSJ1)	16.59	17.91		ENSG00000104889(RNASEH2A)	67.118	109.826	42.5449	21.1521		ENSG00000094755(GABRP)	0	0
ENSG00000068489(PRR11)	85.5954	67.2412		ENSG00000104892(KLC3)	9.75037	22.7389	0.344872	1.00364		ENSG00000094841(UPRT)	6.92884	3.98556
ENSG00000068615(REEP1)	2.85247	1.78339		ENSG00000104907(TRMT1)	15.7003	50.5625	16.6211	27.6193		ENSG00000094880(CDC23)	25.2043	22.7772
ENSG00000068650(ATP11A)	7.76634	4.39489		ENSG00000104946(TBC1D17)	20.1355	29.1578	6.77804	24.5934		ENSG00000094916(CBX5)	38.5983	44.5297
ENSG00000068654(POLR1A)	13.8652	12.9476		ENSG00000104953(TLE6)	14.1791	7.29719	2.6581	6.97161		ENSG00000094963(FMO2)	0	0
ENSG00000068697(LAPTM4A)	161.199	170.324		ENSG00000104969(SGTA)	40.3758	128.812	45.4621	66.3633		ENSG00000095015(MAP3K1)	2.46118	1.39196
ENSG00000068724(TTC7A)	10.2441	10.5221		ENSG00000105011(ASF1B)	40.3673	31.5249	33.2555	2.66903		ENSG00000095203(EPB41L4B)	3.54877	3.51709
ENSG00000068745(IP6K2)	28.0885	35.2283		ENSG00000105048(TNNT1)	20.6159	33.6922	19.6083	89.3151		ENSG00000095209(TMEM38B)	20.3576	12.2306
ENSG00000068781(STON1-GTF2A1L)	9.60905	7.63029		ENSG00000105088(OLFM2)	31.3484	65.8564	0.048537	2.11129		ENSG00000095261(PSMD5)	33.7828	13.0802
ENSG00000068784(SRBD1)	7.6046	8.04734		ENSG00000105137(SYDE1)	7.77083	5.53808	7.61536	4.27677		ENSG00000095303(PTGS1)	3.61173	1.78627
ENSG00000068796(KIF2A)	19.5029	21.2125		ENSG00000105141(CASP14)	822.391	147.892	0	0		ENSG00000095319(NUP188)	38.9269	48.7764
ENSG00000068831(RASGRP2)	0.571887	0.619776		ENSG00000105143(SLC1A6)	188.513	24.4279	0	0		ENSG00000095321(CRAT)	8.87997	9.34227
ENSG00000068878(PSME4)	29.7693	31.2467		ENSG00000105185(PDCD5)	121.654	343.851	256.339	455.767		ENSG00000095370(SH2D3C)	0.156276	0.619976
ENSG00000068885(IFT80)	9.37913	7.85608		ENSG00000105204(DYRK1B)	8.5354	12.3203	6.35864	21.8924		ENSG00000095383(TBC1D2)	29.144	60.7759
ENSG00000068903(SIRT2)	12.5285	14.2081		ENSG00000105219(CNTD2)	0.215678	7.16241	2.141	1.57793		ENSG00000095397(WHRN)	18.8826	24.3447
ENSG00000068912(ERLEC1)	23.1703	22.5381		ENSG00000105223(PLD3)	101.123	199.754	108.857	407.469		ENSG00000095539(SEMA4G)	0.151594	0.354031
ENSG00000068971(PPP2R5B)	3.12031	4.29732		ENSG00000105227(PRX)	2.50809	2.82757	1.2217	2.73926		ENSG00000095585(BLNK)	0	0
ENSG00000069011(PITX1)	7.63709	10.8066		ENSG00000105246(EBI3)	0	0	3.88755	24.3271		ENSG00000095596(CYP26A1)	0.0261488	0
ENSG00000069020(MAST4)	12.0472	10.2765		ENSG00000105287(PRKD2)	19.049	55.9165	16.9927	52.0484		ENSG00000095637(SORBS1)	0.0241816	0.197599
ENSG00000069188(SDK2)	0.378143	0.520729		ENSG00000105290(APLP1)	6.09607	10.4316	13.465	34.8982		ENSG00000095713(CRTAC1)	0	0
ENSG00000069248(NUP133)	17.4447	14.2217		ENSG00000105321(CCDC9)	20.2356	70.7887	20.5098	48.9312		ENSG00000095739(BAMBI)	13.653	29.5516
ENSG00000069275(NUCKS1)	239.043	182.852		ENSG00000105327(BBC3)	1.67587	16.3956	10.3817	120.816		ENSG00000095752(IL11)	41.0253	2.04069
ENSG00000069329(VPS35)	19.1185	20.9832		ENSG00000105329(TGFB1)	12.4161	17.6889	17.9306	69.7764		ENSG00000096006(CRISP3)	0.0819615	0.0605109
ENSG00000069345(DNAJA2)	26.9806	33.0932		ENSG00000105357(MYH14)	30.9954	46.2429	2.06249	3.17285		ENSG00000096063(SRPK1)	38.5995	19.4873
ENSG00000069399(BCL3)	27.4434	48.9743		ENSG00000105376(ICAM5)	2.80104	0.502617	0.106871	1.51663		ENSG00000096070(BRPF3)	6.16656	9.78707
ENSG00000069424(KCNAB2)	3.86846	8.16633		ENSG00000105409(ATP1A3)	0.067077	0.647705	0.572917	0.492267		ENSG00000096401(CDC5L)	17.791	11.1524
ENSG00000069431(ABCC9)	1.16234	2.09889		ENSG00000105429(MEGF8)	9.34183	16.5431	25.6865	31.9321		ENSG00000096433(ITPR3)	33.7671	69.7195
ENSG00000069482(GAL)	38.1241	62.7812		ENSG00000105486(LIG1)	19.3295	21.0863	22.1597	5.3851		ENSG00000096696(DSP)	42.3235	24.9369
ENSG00000069493(CLEC2D)	6.56221	7.47916		ENSG00000105523(FAM83E)	8.07216	6.5325	0.504597	1.87505		ENSG00000096968(JAK2)	3.02264	3.02168
ENSG00000069509(FUNDC1)	11.7383	20.1688		ENSG00000105550(FGF21)	0.152159	1.0434	0	0		ENSG00000097021(ACOT7)	31.8946	73.6545
ENSG00000069535(MAOB)	0.493054	1.0441		ENSG00000105552(BCAT2)	23.0509	17.4132	55.1055	96.3816		ENSG00000097096(SYDE2)	4.09392	1.34689
ENSG00000069696(DRD4)	0.350174	0.367061		ENSG00000105556(MIER2)	2.35408	8.88244	3.1561	7.94286		ENSG00000099139(PCSK5)	0.00823616	0
ENSG00000069702(TGFBR3)	0.470506	0.483948		ENSG00000105559(PLEKHA4)	22.5192	15.7049	5.39301	8.4443		ENSG00000099194(SCD)	304.982	109.353
ENSG00000069712(KIAA1107)	0.620096	0.417332		ENSG00000105605(CACNG7)	0	0	0.305306	1.98047		ENSG00000099219(ERMP1)	24.6354	9.4119
ENSG00000069764(PLA2G10)	0.691023	2.10163		ENSG00000105607(GCDH)	25.6682	22.9707	12.9846	6.67003		ENSG00000099250(NRP1)	8.39577	12.4142
ENSG00000069812(HES2)	0.797784	2.69704		ENSG00000105612(DNASE2)	93.1535	253.845	13.7241	44.5285		ENSG00000099256(PRTFDC1)	0.512508	0.230443
ENSG00000069849(ATP1B3)	45.4493	67.9493		ENSG00000105613(MAST1)	6.35385	18.0262	0.28677	1.93196		ENSG00000099260(PALMD)	7.47217	2.70475
ENSG00000069869(NEDD4)	8.06919	8.22234		ENSG00000105617(LENG1)	5.75471	12.4178	6.50957	9.1827		ENSG00000099308(MAST3)	2.76271	3.61759
ENSG00000069943(PIGB)	4.97413	5.21819		ENSG00000105639(JAK3)	1.07625	0.322291	0.2944	2.69036		ENSG00000099330(OCEL1)	20.7896	23.972
ENSG00000069956(MAPK6)	45.2959	58.0481		ENSG00000105647(PIK3R2)	19.9341	16.9262	10.213	7.62264		ENSG00000099337(KCNK6)	0.439652	1.50196
ENSG00000069966(GNB5)	16.7862	11.7766		ENSG00000105649(RAB3A)	1.89255	0.474852	0.790499	2.11474		ENSG00000099338(CATSPERG)	0.0396691	0.114944
ENSG00000069974(RAB27A)	15.1569	15.8145		ENSG00000105656(ELL)	7.21023	10.2412	3.37998	7.96387		ENSG00000099617(EFNA2)	0.552044	0.726251
ENSG00000069998(HDHD5)	29.4926	28.6594		ENSG00000105662(CRTC1)	11.5253	21.2479	2.96256	2.85198		ENSG00000099625(CBARP)	2.55409	5.29421
ENSG00000070010(UFD1L)	86.8695	98.839		ENSG00000105676(ARMC6)	19.2104	34.2998	19.2233	8.81145		ENSG00000099785(MARCH2)	8.08654	3.57238
ENSG00000070018(LRP6)	4.79164	4.40499		ENSG00000105696(TMEM59L)	0.0414476	0.418715	1.82739	0.68697		ENSG00000099810(MTAP)	30.998	23.4921
ENSG00000070047(PHRF1)	10.2201	9.10758		ENSG00000105699(LSR)	96.131	263.958	23.4135	99.3981		ENSG00000099812(MISP)	47.1069	46.6075
ENSG00000070061(IKBKAP)	20.4104	17.0327		ENSG00000105784(RUNDC3B)	1.70312	0.388847	0.124446	0.0444751		ENSG00000099814(CEP170B)	14.0199	33.7188
ENSG00000070081(NUCB2)	32.1771	40.7979		ENSG00000105808(RASA4)	31.2373	32.8617	14.4783	17.5446		ENSG00000099822(HCN2)	14.7721	20.721
ENSG00000070087(PFN2)	148.895	145		ENSG00000105810(CDK6)	5.98937	4.89193	21.0779	11.4682		ENSG00000099834(CDHR5)	0.0566032	0.160185
ENSG00000070159(PTPN3)	11.1131	8.5858		ENSG00000105821(DNAJC2)	21.7902	69.5129	22.3717	28.2753		ENSG00000099840(IZUMO4)	0.196739	1.19913
ENSG00000070182(SPTB)	0.25984	0.351407		ENSG00000105825(TFPI2)	0.0517076	0.603402	649.03	196.897		ENSG00000099849(RASSF7)	10.1398	31.2822
ENSG00000070214(SLC44A1)	25.5733	20.7742		ENSG00000105852(PON3)	0.501295	0.352187	30.7366	52.812		ENSG00000099860(GADD45B)	19.1469	9.10681
ENSG00000070269(TMEM260)	5.81572	6.29591		ENSG00000105855(ITGB8)	13.2166	11.9183	4.42569	7.29582		ENSG00000099864(PALM)	14.8386	10.2168
ENSG00000070366(SMG6)	9.06924	9.3771		ENSG00000105875(WDR91)	10.5563	4.2004	2.18818	2.6506		ENSG00000099866(MADCAM1)	0.188005	0.388316
ENSG00000070367(EXOC5)	28.969	23.9219		ENSG00000105877(DNAH11)	3.01207	1.47448	0.0657455	0.421224		ENSG00000099875(MKNK2)	32.1124	36.9739
ENSG00000070371(CLTCL1)	1.04804	0.712742		ENSG00000105887(MTPN)	66.1854	12.9755	79.6445	31.6518		ENSG00000099889(ARVCF)	0.830241	3.08355
ENSG00000070404(FSTL3)	18.9119	11.9368		ENSG00000105929(ATP6V0A4)	74.9806	39.4937	0.243937	0.219553		ENSG00000099937(SERPIND1)	0.0217827	0
ENSG00000070413(DGCR2)	28.664	22.6449		ENSG00000105939(ZC3HAV1)	23.8278	23.4431	52.1852	63.7458		ENSG00000099954(CECR2)	0.084665	0.0835999
ENSG00000070423(RNF126)	22.2907	26.1364		ENSG00000105963(ADAP1)	5.12109	14.1133	4.70479	9.46193		ENSG00000099956(SMARCB1)	26.6837	9.98532
ENSG00000070444(MNT)	4.97315	7.66185		ENSG00000105968(H2AFV)	140.449	207.514	145.687	107.093		ENSG00000099958(DERL3)	0.067834	0
ENSG00000070476(ZXDC)	13.9332	10.8065		ENSG00000105971(CAV2)	36.1803	8.8174	60.4016	37.9322		ENSG00000099968(BCL2L13)	27.4618	10.1554
ENSG00000070495(JMJD6)	16.7823	21.429		ENSG00000105974(CAV1)	11.8553	11.8681	144.378	48.9718		ENSG00000099977(DDT)	91.2031	152.34
ENSG00000070501(POLB)	10.285	8.18023		ENSG00000105976(MET)	15.953	4.58821	47.3877	22.7098		ENSG00000099985(OSM)	0	0
ENSG00000070540(WIPI1)	12.7221	6.98852		ENSG00000105997(HOXA3)	4.16527	1.12089	11.2468	5.51841		ENSG00000099992(TBC1D10A)	4.46741	12.349
ENSG00000070610(GBA2)	12.7167	16.0162		ENSG00000106009(BRAT1)	21.0889	68.4493	27.0786	30.9773		ENSG00000100023(PPIL2)	8.83037	27.2409
ENSG00000070614(NDST1)-2	13.332	10.7125		ENSG00000106069(CHN2)	3.67955	1.23425	0.835956	1.23626		ENSG00000100028(SNRPD3)	64.19	177.408
ENSG00000070669(ASNS)	51.4061	84.809		ENSG00000106070(GRB10)	15.4067	30.3639	36.3534	104.693		ENSG00000100030(MAPK1)	28.496	14.6503
ENSG00000070718(AP3M2)	7.15263	6.1065		ENSG00000106080(FKBP14)	14.2163	12.4418	17.0795	13.7888		ENSG00000100031(GGT1)	1.93119	16.2477
ENSG00000070731(ST6GALNAC2)	24.1546	23.901		ENSG00000106123(EPHB6)	5.98663	22.6012	0.251679	1.44228		ENSG00000100036(SLC35E4)	4.07031	5.27808
ENSG00000070756(PABPC1)	1514.04	1813.92		ENSG00000106211(HSPB1)	299.035	745.675	330.29	1225.68		ENSG00000100055(CYTH4)	0	1.01471
ENSG00000070759(TESK2)	3.44249	3.33323		ENSG00000106258(CYP3A5)	0.237674	0.305889	3.16664	14.0642		ENSG00000100056(DGCR14)	4.99438	29.6295
ENSG00000070761(CFAP20)	15.6246	15.5978		ENSG00000106261(ZKSCAN1)	22.1422	7.36761	8.60291	9.01621		ENSG00000100092(SH3BP1)	0.172189	0.200206
ENSG00000070770(CSNK2A2)	13.8928	11.7054		ENSG00000106263(EIF3B)	134.211	67.5273	151.891	48.1743		ENSG00000100100(PIK3IP1)	0.037375	0.274696
ENSG00000070778(PTPN21)	5.09454	2.45249		ENSG00000106268(NUDT1)	31.6146	38.4763	64.212	28.1076		ENSG00000100116(GCAT)	13.2281	22.0969
ENSG00000070785(EIF2B3)	14.1018	15.8626		ENSG00000106330(MOSPD3)	20.9203	19.5998	4.59307	17.5497		ENSG00000100147(CCDC134)	3.82322	9.20585
ENSG00000070814(TCOF1)	22.5251	20.5463		ENSG00000106351(AGFG2)	7.84293	4.25595	4.35669	13.5472		ENSG00000100150(DEPDC5)	2.00337	10.1419
ENSG00000070831(CDC42)	126.664	109.17		ENSG00000106355(LSM5)	32.84	20.7186	49.3576	18.5943		ENSG00000100162(CENPM)	24.1779	41.4832
ENSG00000070950(RAD18)	11.0043	11.2159		ENSG00000106366(SERPINE1)	0.158647	0.486247	47.2125	263.116		ENSG00000100167(SEPT3)	0.241549	2.01522
ENSG00000070961(ATP2B1)	30.4725	23.5598		ENSG00000106399(RPA3)	30.5923	12.8406	22.3484	8.09144		ENSG00000100170(SLC5A1)	0.0324742	0
ENSG00000071051(NCK2)	13.0939	17.107		ENSG00000106404(CLDN15)	1.87233	10.981	6.87481	8.51662		ENSG00000100209(HSCB)	14.9047	37.313
ENSG00000071054(MAP4K4)	14.8847	13.5225		ENSG00000106460(TMEM106B)	43.0677	6.95987	68.8114	25.4193		ENSG00000100216(TOMM22)	54.0041	44.6837
ENSG00000071073(MGAT4A)	17.8253	11.4096		ENSG00000106484(MEST)	20.2626	8.73951	21.7982	10.9371		ENSG00000100219(XBP1)	153.226	64.9961
ENSG00000071082(RPL31)	954.826	1177.76		ENSG00000106537(TSPAN13)	128.427	30.6723	50.3569	20.07		ENSG00000100234(TIMP3)	33.9644	26.8596
ENSG00000071127(WDR1)	81.2889	95.7165		ENSG00000106560(GIMAP2)	0.0983915	0.118744	0.144991	4.93964		ENSG00000100258(LMF2)	41.8658	118.725
ENSG00000071189(SNX13)	11.3015	8.17229		ENSG00000106571(GLI3)	3.61286	6.88595	0.0559594	0.0534053		ENSG00000100263(RHBDD3)	12.0222	30.7072
ENSG00000071205(ARHGAP10)	9.05533	10.5509		ENSG00000106628(POLD2)	102.556	37.7984	81.9432	31.4012		ENSG00000100276(RASL10A)	0.17084	1.06832
ENSG00000071243(ING3)	5.42601	6.50001		ENSG00000106635(BCL7B)	24.4832	28.4649	32.0493	9.82267		ENSG00000100281(HMGXB4)	16.9161	10.8982
ENSG00000071246(VASH1)	2.87932	1.65083		ENSG00000106665(CLIP2)	4.40601	14.7148	4.97352	22.5763		ENSG00000100284(TOM1)	16.8054	49.3669
ENSG00000071282(LMCD1)	14.4707	8.36605		ENSG00000106686(SPATA6L)	1.69204	2.62182	1.6029	4.444		ENSG00000100290(BIK)	1.76106	5.30807
ENSG00000071462(WBSCR22)	98.8128	118.09		ENSG00000106688(SLC1A1)	4.94203	5.06842	1.52375	7.92022		ENSG00000100292(HMOX1)	7.54356	108.668
ENSG00000071537(SEL1L)	25.1736	15.9374		ENSG00000106689(LHX2)	1.75472	13.1721	4.42476	3.49726		ENSG00000100302(RASD2)	0.692943	0.858792
ENSG00000071539(TRIP13)	28.67	24.3887		ENSG00000106692(FKTN)	4.216	1.4814	7.23146	3.55778		ENSG00000100307(CBX7)	2.92581	2.64539
ENSG00000071553(ATP6AP1)	171.277	223.307		ENSG00000106723(SPIN1)	23.5152	9.5546	26.2405	9.85505		ENSG00000100311(PDGFB)	4.91953	3.07024
ENSG00000071564(TCF3)	54.9724	43.5775		ENSG00000106733(NMRK1)	13.1603	5.16436	3.40364	13.1062		ENSG00000100336(APOL4)	27.217	164.306
ENSG00000071575(TRIB2)	4.75183	10.6336		ENSG00000106780(MEGF9)	6.65053	4.81854	20.5162	15.0162		ENSG00000100342(APOL1)	14.5292	47.17
ENSG00000071626(DAZAP1)	80.7097	63.0403		ENSG00000106789(CORO2A)	5.22147	5.19853	3.4209	15.1105		ENSG00000100344(PNPLA3)	2.99245	3.23065
ENSG00000071655(MBD3)	64.2012	77.3877		ENSG00000106799(TGFBR1)	8.44827	3.1044	13.0181	8.58095		ENSG00000100346(CACNA1I)	0.0179191	0.0288388
ENSG00000071794(HLTF)	26.6579	23.7688		ENSG00000106803(SEC61B)	103.292	40.1315	250.453	119.646		ENSG00000100351(GRAP2)	0	0
ENSG00000071859(FAM50A)	47.976	66.4471		ENSG00000106868(SUSD1)	0.582307	1.02486	7.21822	3.21833		ENSG00000100368(CSF2RB)	0.0630073	0.0443215
ENSG00000071889(FAM3A)	33.2918	40.2882		ENSG00000106976(DNM1)	3.91721	3.50216	40.8241	55.9024		ENSG00000100379(KCTD17)	0.482176	3.14
ENSG00000071894(CPSF1)	43.0483	40.0624		ENSG00000107099(DOCK8)	1.8569	0.532118	0.0187134	0.0939917		ENSG00000100395(L3MBTL2)	9.05573	17.0327
ENSG00000071994(PDCD2)	55.6456	61.4112		ENSG00000107105(ELAVL2)	1.63713	8.60374	0.31912	0		ENSG00000100416(TRMU)	12.6556	32.5414
ENSG00000072042(RDH11)	142.159	210.486		ENSG00000107159(CA9)	20.7001	7.82295	1.17338	48.6231		ENSG00000100417(PMM1)	17.294	39.015
ENSG00000072062(PRKACA)	66.8346	72.9736		ENSG00000107164(FUBP3)	28.8519	8.34274	39.1289	14.0584		ENSG00000100422(CERK)	5.72926	5.53393
ENSG00000072071(ADGRL1)	10.4693	14.6691		ENSG00000107187(LHX3)	0	0.151728	0	0.0364906		ENSG00000100473(COCH)	0.0307501	0
ENSG00000072110(ACTN1)	79.2129	75.761		ENSG00000107404(DVL1)	11.5233	37.102	26.0714	38.0749		ENSG00000100478(AP4S1)	4.01556	1.10855
ENSG00000072121(ZFYVE26)	8.32468	8.38003		ENSG00000107518(ATRNL1)	0.264649	0.705815	1.91831	3.47726		ENSG00000100479(POLE2)	4.74908	7.4151
ENSG00000072133(RPS6KA6)	1.845	1.49455		ENSG00000107551(RASSF4)	0.413671	0.546308	0.102464	3.26799		ENSG00000100504(PYGL)	60.3908	40.4678
ENSG00000072134(EPN2)	13.8128	11.0426		ENSG00000107560(RAB11FIP2)	3.59699	4.85788	9.90247	4.74929		ENSG00000100505(TRIM9)	0.0639532	0.187455
ENSG00000072135(PTPN18)	19.4887	33.2612		ENSG00000107581(EIF3A)	55.8362	25.3274	87.9772	35.6645		ENSG00000100522(GNPNAT1)	39.1086	15.769
ENSG00000072195(SPEG)	2.19209	2.6904		ENSG00000107614(TRDMT1)	3.38369	1.94778	5.76804	1.17215		ENSG00000100526(CDKN3)	65.8456	65.3923
ENSG00000072201(LNX1)	3.24736	3.74556		ENSG00000107651(SEC23IP)	13.88	8.46672	24.9738	17.0784		ENSG00000100528(CNIH1)	116.815	26.0932
ENSG00000072210(ALDH3A2)	24.456	23.4036		ENSG00000107669(ATE1)	6.84704	3.8799	17.3788	7.39362		ENSG00000100554(ATP6V1D)	28.1754	34.0074
ENSG00000072274(TFRC)	138.661	48.2583		ENSG00000107731(UNC5B)	5.9369	11.251	0.499581	2.11746		ENSG00000100558(PLEK2)	14.6071	9.02669
ENSG00000072310(SREBF1)	78.1989	96.3181		ENSG00000107738(VSIR)	13.3816	11.3279	2.43479	5.28197		ENSG00000100578(KIAA0586)	7.87194	5.69172
ENSG00000072364(AFF4)	21.9952	18.6861		ENSG00000107742(SPOCK2)	4.33362	1.97527	0.0699077	0.227987		ENSG00000100583(SAMD15)	0.192597	0.264689
ENSG00000072401(UBE2D1)	8.10436	6.65996		ENSG00000107789(MINPP1)	14.5252	6.48569	31.7986	19.1627		ENSG00000100592(DAAM1)	7.71923	3.34812
ENSG00000072415(MPP5)	18.8014	13.6349		ENSG00000107796(ACTA2)	0.0680789	0.107238	0.973517	16.4765		ENSG00000100593(ISM2)	0.047766	0
ENSG00000072422(RHOBTB1)	1.61572	1.00525		ENSG00000107798(LIPA)	52.941	8.16409	24.001	15.2753		ENSG00000100599(RIN3)	1.01235	1.79965
ENSG00000072501(SMC1A)	30.7837	20.8248		ENSG00000107815(TWNK)	4.29744	12.6872	13.7866	16.812		ENSG00000100612(DHRS7)	38.1626	110.64
ENSG00000072506(HSD17B10)	139.84	159.013		ENSG00000107864(CPEB3)	1.11613	1.81298	1.32034	1.77942		ENSG00000100626(GALNT16)	0.0393049	0.0140329
ENSG00000072518(MARK2)	28.0597	35.7845		ENSG00000107882(SUFU)	3.91221	3.56909	4.26013	4.34484		ENSG00000100628(ASB2)	0	0.104311
ENSG00000072571(HMMR)	18.9605	13.1352		ENSG00000107897(ACBD5)	8.58978	4.4758	28.8799	14.4022		ENSG00000100629(CEP128)	4.13726	4.69445
ENSG00000072609(CHFR)	33.7847	37.4841		ENSG00000107902(LHPP)	26.9294	11.9066	7.06175	17.8354		ENSG00000100644(HIF1A)	342.117	45.2387
ENSG00000072682(P4HA2)	14.5835	22.6262		ENSG00000107954(NEURL1)	2.35301	7.11845	0.0402089	0.903127		ENSG00000100647(SUSD6)	3.89553	6.64584
ENSG00000072736(NFATC3)	17.6737	15.279		ENSG00000107957(SH3PXD2A)	9.79062	11.5518	1.41488	3.31078		ENSG00000100664(EIF5)	107.333	87.7747
ENSG00000072756(TRNT1)	33.1188	24.5832		ENSG00000107984(DKK1)	2.26833	4.81502	247.542	146.5		ENSG00000100665(SERPINA4)	0	0
ENSG00000072778(ACADVL)	61.2249	84.9425		ENSG00000108064(TFAM)	33.1176	12.7143	37.3545	11.9434		ENSG00000100739(BDKRB1)	0.191266	0.412937
ENSG00000072786(STK10)	8.29646	9.65316		ENSG00000108091(CCDC6)	33.5108	8.12705	23.5805	11.8629		ENSG00000100744(GSKIP)	14.0557	4.19049
ENSG00000072803(FBXW11)	27.8336	27.5194		ENSG00000108106(UBE2S)	55.3533	111.754	185.569	54.2496		ENSG00000100749(VRK1)	16.4516	13.9327
ENSG00000072849(DERL2)	21.3591	19.9251		ENSG00000108176(DNAJC12)	4.51524	4.6723	35.0172	39.9109		ENSG00000100764(PSMC1)	46.2395	29.6172
ENSG00000072858(SIDT1)	14.5717	12.6739		ENSG00000108179(PPIF)	53.9535	91.6867	97.1216	41.0095		ENSG00000100767(PAPLN)	1.83076	1.71467
ENSG00000072864(NDE1)	14.9974	11.2725		ENSG00000108262(GIT1)	13.4432	64.2821	25.4101	41.0331		ENSG00000100811(YY1)	33.7226	19.0053
ENSG00000072954(TMEM38A)	2.51769	1.49439		ENSG00000108306(FBXL20)	4.73602	6.07729	2.5417	11.1847		ENSG00000100814(CCNB1IP1)	37.4475	33.2231
ENSG00000072958(AP1M1)	29.304	31.9803		ENSG00000108342(CSF3)	0	0	1.92213	16.9807		ENSG00000100852(ARHGAP5)	29.9723	16.1257
ENSG00000073008(PVR)	12.0015	13.7909		ENSG00000108370(RGS9)	1.00772	0.765486	2.13787	4.94225		ENSG00000100867(DHRS2)	20.5932	10.7626
ENSG00000073050(XRCC1)	26.5732	21.5143		ENSG00000108387(SEPT4)	0.584779	0.122069	1.86788	11.9893		ENSG00000100889(PCK2)	39.8706	26.6892
ENSG00000073060(SCARB1)	48.3962	51.7885		ENSG00000108405(P2RX1)	0	0	0	0.080575		ENSG00000100897(DCAF11)	23.588	7.43196
ENSG00000073111(MCM2)	51.4289	34.6869		ENSG00000108439(PNPO)	17.4603	7.69225	27.5041	10.3603		ENSG00000100906(NFKBIA)	90.5745	135.396
ENSG00000073150(PANX2)	4.39265	5.1886		ENSG00000108448(TRIM16L)	7.14749	4.73153	73.0444	29.596		ENSG00000100916(BRMS1L)	5.04084	3.85764
ENSG00000073169(SELENOO)	16.7554	12.965		ENSG00000108510(MED13)	9.85021	5.73636	12.6254	11.5857		ENSG00000100918(REC8)	0.268374	1.15493
ENSG00000073331(ALPK1)	1.69192	1.71496		ENSG00000108515(ENO3)	3.46403	6.03557	16.0085	52.6537		ENSG00000100934(SEC23A)	52.1414	19.4767
ENSG00000073350(LLGL2)	211.239	207.236		ENSG00000108551(RASD1)	0	1.15117	0.625595	17.7792		ENSG00000100949(RABGGTA)	15.4355	32.8884
ENSG00000073417(PDE8A)	25.8804	30.8479		ENSG00000108582(CPD)	19.0713	5.78044	35.2787	18.7019		ENSG00000100968(NFATC4)	0.217455	1.18174
ENSG00000073464(CLCN4)	0.153976	0.413415		ENSG00000108588(CCDC47)	59.5641	17.8354	75.995	20.4051		ENSG00000100985(MMP9)	0.0863561	0.135724
ENSG00000073536(NLE1)	9.06765	7.99132		ENSG00000108602(ALDH3A1)	0.759279	0.966207	771.65	886.861		ENSG00000101000(PROCR)	13.9863	23.4589
ENSG00000073578(SDHA)	98.1497	102.932		ENSG00000108679(LGALS3BP)	131.985	162.978	101.03	569.078		ENSG00000101003(GINS1)	17.7624	13.4882
ENSG00000073584(SMARCE1)	42.6102	45.3369		ENSG00000108684(ASIC2)	0	0	1.92229	1.77166		ENSG00000101017(CD40)	0	0
ENSG00000073605(GSDMB)	12.2567	11.9248		ENSG00000108771(DHX58)	1.96617	2.34628	1.77262	3.61266		ENSG00000101040(ZMYND8)	11.7437	4.95013
ENSG00000073670(ADAM11)	1.10038	0.805625		ENSG00000108797(CNTNAP1)	0.433934	0.867536	3.69241	7.50589		ENSG00000101049(SGK2)	0	0.0999273
ENSG00000073711(PPP2R3A)	1.84407	1.36688		ENSG00000108799(EZH1)	3.37822	5.04982	5.27891	11.0462		ENSG00000101057(MYBL2)	56.557	225.024
ENSG00000073712(FERMT2)	15.8368	20.0333		ENSG00000108821(COL1A1)	2.29864	8.36197	2.21961	9.58855		ENSG00000101076(HNF4A)	0.132586	0.280891
ENSG00000073803(MAP3K13)	8.36301	9.41922		ENSG00000108829(LRRC59)	54.4354	23.9492	129.569	47.4569		ENSG00000101082(SLA2)	0.0202374	0.939501
ENSG00000073849(ST6GAL1)	0.41527	0.529976		ENSG00000108840(HDAC5)	17.1048	20.7149	1.18247	19.8952		ENSG00000101096(NFATC2)	0.347782	0.397213
ENSG00000073910(FRY)	8.40586	6.38975		ENSG00000108861(DUSP3)	18.5987	13.6386	25.1069	13.0932		ENSG00000101098(RIMS4)	0.0335671	0.0613156
ENSG00000073921(PICALM)	70.4809	69.7964		ENSG00000108932(SLC16A6)	1.01248	0.772866	1.54487	1.95533		ENSG00000101144(BMP7)	0	0
ENSG00000073969(NSF)	27.4119	20.0968		ENSG00000108946(PRKAR1A)	96.588	35.4755	102.869	47.1183		ENSG00000101158(NELFCD)	34.4253	22.7769
ENSG00000074054(CLASP1)	11.9171	13.5818		ENSG00000108947(EFNB3)	7.54582	3.94214	0.222146	1.07869		ENSG00000101188(NTSR1)	0.703487	2.1146
ENSG00000074071(MRPS34)	141.837	169.554		ENSG00000108984(MAP2K6)	2.17593	0.136331	18.7013	20.7804		ENSG00000101204(CHRNA4)	0.0162092	0
ENSG00000074181(NOTCH3)	32.9049	29.7195		ENSG00000109089(CDR2L)	11.3143	38.5188	29.5759	30.4873		ENSG00000101210(EEF1A2)	2.43783	2.48757
ENSG00000074201(CLNS1A)	93.9795	57.134		ENSG00000109099(PMP22)	2.77063	7.07879	72.7027	116.684		ENSG00000101213(PTK6)	3.06878	4.56831
ENSG00000074211(PPP2R2C)	11.4842	7.98273		ENSG00000109107(ALDOC)	0.190101	0.39315	0.851499	35.2481		ENSG00000101230(ISM1)	0.0330887	0.57869
ENSG00000074219(TEAD2)	6.42474	8.70611		ENSG00000109189(USP46)	5.6777	2.63904	4.31717	2.26874		ENSG00000101265(RASSF2)	0.130763	0.36797
ENSG00000074266(EED)	23.5815	30.3564		ENSG00000109321(AREG)	0.355032	5.00594	43.1541	57.0958		ENSG00000101276(SLC52A3)	0.340279	0.480351
ENSG00000074319(TSG101)	33.6535	36.8385		ENSG00000109452(INPP4B)	0.610372	3.44879	5.2833	7.35999		ENSG00000101294(HM13)	70.8449	216.082
ENSG00000074356(NCBP3)	15.1705	10.1153		ENSG00000109472(CPE)	1.69239	0.341337	2.27957	2.70341		ENSG00000101298(SNPH)	1.29484	4.27161
ENSG00000074370(ATP2A3)	91.7547	103.507		ENSG00000109501(WFS1)	9.91653	4.21755	10.5386	8.24663		ENSG00000101307(SIRPB1)	0	0
ENSG00000074410(CA12)	68.5302	87.0596		ENSG00000109511(ANXA10)	0	0	4.33428	15.356		ENSG00000101311(FERMT1)	10.5846	4.44065
ENSG00000074416(MGLL)	13.7981	17.4224		ENSG00000109534(GAR1)	13.4494	5.87995	19.9481	7.71103		ENSG00000101331(CCM2L)	0.0559099	0
ENSG00000074527(NTN4)	1.8233	3.62536		ENSG00000109572(CLCN3)	26.4785	7.1955	18.1823	9.55454		ENSG00000101333(PLCB4)	11.0611	2.9922
ENSG00000074582(BCS1L)	28.5436	29.9462		ENSG00000109586(GALNT7)	34.6141	9.09345	43.3253	10.9774		ENSG00000101335(MYL9)	20.8833	114.629
ENSG00000074590(NUAK1)	2.77864	4.65508		ENSG00000109606(DHX15)	72.0909	24.9681	63.7653	24.7682		ENSG00000101342(TLDC2)	0.364981	0.212682
ENSG00000074603(DPP8)	13.502	11.9939		ENSG00000109654(TRIM2)	9.56724	6.25387	2.17301	3.70284		ENSG00000101346(POFUT1)	20.7117	7.24635
ENSG00000074621(SLC24A1)	3.09917	2.87116		ENSG00000109670(FBXW7)	6.34245	6.42243	3.55602	8.28307		ENSG00000101367(MAPRE1)	36.917	19.8498
ENSG00000074657(ZNF532)	1.12341	1.41086		ENSG00000109674(NEIL3)	4.94731	4.37155	17.9679	1.87486		ENSG00000101384(JAG1)	9.68357	4.42551
ENSG00000074695(LMAN1)	18.1215	12.084		ENSG00000109686(SH3D19)	7.25891	5.07344	12.4256	5.60157		ENSG00000101400(SNTA1)	5.06882	2.90398
ENSG00000074696(HACD3)	69.6976	68.0782		ENSG00000109738(GLRB)	11.3361	2.90387	1.89686	2.03905		ENSG00000101412(E2F1)	16.4256	27.3933
ENSG00000074755(ZZEF1)	10.7879	9.2917		ENSG00000109756(RAPGEF2)	4.78281	7.75597	5.69518	8.89203		ENSG00000101417(PXMP4)	0.00859301	0
ENSG00000074800(ENO1)	1181.05	1184.76		ENSG00000109762(SNX25)	3.56027	3.1195	3.84183	3.66775		ENSG00000101447(FAM83D)	23.0481	17.965
ENSG00000074842(MYDGF)	77.7342	97.7676		ENSG00000109771(LRP2BP)	0.358554	0.195887	0.186071	0.707465		ENSG00000101452(DHX35)	5.2652	9.54626
ENSG00000074855(ANO8)	4.22679	4.5732		ENSG00000109790(KLHL5)	39.6098	12.4825	31.9573	17.3335		ENSG00000101460(MAP1LC3A)	0.0389683	0.186003
ENSG00000074935(TUBE1)	3.65421	4.54739		ENSG00000109805(NCAPG)	15.9298	10.6844	21.5093	1.73367		ENSG00000101493(ZNF516)	0	0.0435732
ENSG00000074964(ARHGEF10L)	7.80022	7.52315		ENSG00000109814(UGDH)	10.204	4.29795	244.98	58.9189		ENSG00000101557(USP14)	59.821	34.3021
ENSG00000074966(TXK)	0.832768	1.0105		ENSG00000109846(CRYAB)	49.9462	59.5937	9.92649	33.3602		ENSG00000101558(VAPA)	84.6675	9.97803
ENSG00000075043(KCNQ2)	0.607691	0.426191		ENSG00000109881(CCDC34)	24.3755	10.0479	13.2063	4.49541		ENSG00000101596(SMCHD1)	16.3197	8.77968
ENSG00000075089(ACTR6)	18.2089	16.1282		ENSG00000109927(TECTA)	0.302506	0.00812387	0.0396762	0.0808755		ENSG00000101638(ST8SIA5)	0.0913533	0.40404
ENSG00000075131(TIPIN)	14.488	13.77		ENSG00000110002(VWA5A)	4.93064	2.3421	2.13039	5.52842		ENSG00000101639(CEP192)	7.8802	7.7823
ENSG00000075142(SRI)	36.329	25.0187		ENSG00000110042(DTX4)	37.8028	12.4936	4.35834	5.34184		ENSG00000101670(LIPG)	0.149603	0.23118
ENSG00000075151(EIF4G3)	18.8339	17.9852		ENSG00000110046(ATG2A)	8.12671	12.8234	7.8059	21.9357		ENSG00000101752(MIB1)	21.0492	17.4223
ENSG00000075188(NUP37)	44.312	44.74		ENSG00000110060(PUS3)	12.2457	22.4432	4.3609	13.3804		ENSG00000101773(RBBP8)	24.6489	15.8007
ENSG00000075218(GTSE1)	15.388	9.34423		ENSG00000110092(CCND1)	11.0074	5.72526	68.7363	22.8272		ENSG00000101782(RIOK3)	18.9763	10.7704
ENSG00000075223(SEMA3C)	109.696	66.4334		ENSG00000110104(CCDC86)	24.1962	77.5541	35.1435	43.2233		ENSG00000101842(VSIG1)	0	0.104483
ENSG00000075234(TTC38)	4.78545	4.52726		ENSG00000110171(TRIM3)	6.16958	13.3442	4.78348	15.2708		ENSG00000101843(PSMD10)	54.9523	12.0201
ENSG00000075239(ACAT1)	15.9828	10.0961		ENSG00000110321(EIF4G2)	290.619	98.0385	331.746	82.1731		ENSG00000101846(STS)	15.4349	17.3661
ENSG00000075240(GRAMD4)	9.95	7.31813		ENSG00000110324(IL10RA)	0.0640538	0.0736307	0.0705788	1.21747		ENSG00000101849(TBL1X)	38.3418	23.0899
ENSG00000075275(CELSR1)	21.7352	17.6468		ENSG00000110427(KIAA1549L)	2.90501	2.10939	0.506227	0.533276		ENSG00000101850(GPR143)	0.762429	4.65063
ENSG00000075292(ZNF638)	26.1282	28.6496		ENSG00000110436(SLC1A2)	1.83143	2.94129	0.0998757	0.668261		ENSG00000101856(PGRMC1)	120.876	31.784
ENSG00000075303(SLC25A40)	14.1545	10.5877		ENSG00000110446(SLC15A3)	5.94514	4.30682	0.609708	3.57824		ENSG00000101868(POLA1)	26.6449	14.3431
ENSG00000075336(TIMM21)	11.0687	13.4693		ENSG00000110484(SCGB2A2)	0.706727	4.45297	0	0		ENSG00000101871(MID1)	21.3652	10.365
ENSG00000075391(RASAL2)	1.88332	1.56688		ENSG00000110492(MDK)	129.768	355.25	4.77412	17.8924		ENSG00000101888(NXT2)	7.08509	2.71782
ENSG00000075399(VPS9D1)	5.72014	5.28092		ENSG00000110628(SLC22A18)	18.3367	22.9854	26.5649	76.0733		ENSG00000101945(SUV39H1)	16.1279	29.1311
ENSG00000075407(ZNF37A)	3.31234	3.46889		ENSG00000110697(PITPNM1)	22.2593	65.1957	29.0408	46.4721		ENSG00000101955(SRPX)	0.0523838	0.0498908
ENSG00000075413(MARK3)	42.6748	51.1003		ENSG00000110719(TCIRG1)	62.2726	65.1242	57.9818	115.433		ENSG00000101966(XIAP)	12.6915	6.60502
ENSG00000075415(SLC25A3)	445.818	402.507		ENSG00000110811(P3H3)	0.113093	0.0417386	11.2922	24.6243		ENSG00000101972(STAG2)	61.4594	21.2752
ENSG00000075420(FNDC3B)	7.37853	9.85745		ENSG00000110852(CLEC2B)	1.26119	3.918	0.917123	10.689		ENSG00000101974(ATP11C)	15.905	8.87904
ENSG00000075426(FOSL2)	21.0287	13.3783		ENSG00000110881(ASIC1)	4.53074	3.65038	1.86308	2.96592		ENSG00000101977(MCF2)	0.370223	2.20658
ENSG00000075461(CACNG4)	164.88	84.0176		ENSG00000110911(SLC11A2)	39.5655	15.0916	29.0444	19.3813		ENSG00000101986(ABCD1)	29.8311	39.3862
ENSG00000075539(FRYL)	9.80177	6.32818		ENSG00000110917(MLEC)	31.4593	29.491	84.6274	18.9819		ENSG00000102003(SYP)	0.283427	2.20772
ENSG00000075568(TMEM131)	17.6868	19.2091		ENSG00000110944(IL23A)	0.103205	0.342881	0	0.877413		ENSG00000102007(PLP2)	308.563	794.763
ENSG00000075618(FSCN1)	4.61142	6.07713		ENSG00000110958(PTGES3)	158.809	136.17	337.484	120.078		ENSG00000102024(PLS3)	471.696	76.9883
ENSG00000075624(ACTB)	1749.17	2109.75		ENSG00000111087(GLI1)	0.228227	0.256083	1.29315	5.33519		ENSG00000102038(SMARCA1)	5.55131	3.00524
ENSG00000075643(MOCOS)	4.12795	5.27243		ENSG00000111110(PPM1H)	2.02441	1.11479	4.19885	3.0331		ENSG00000102048(ASB9)	2.34035	1.20639
ENSG00000075651(PLD1)-2	0.508005	1.15951		ENSG00000111203(ITFG2)	3.66956	7.7087	5.51004	4.1308		ENSG00000102053(ZC3H12B)	0.27722	0.666809
ENSG00000075702(WDR62)	11.8063	9.64952		ENSG00000111206(FOXM1)	26.6836	40.9499	43.6224	3.90827		ENSG00000102057(KCND1)	3.57201	4.63363
ENSG00000075711(DLG1)	23.4925	24.5649		ENSG00000111247(RAD51AP1)	11.3415	12.5335	21.4841	2.66598		ENSG00000102081(FMR1)	18.5114	8.67782
ENSG00000075785(RAB7A)	127.694	135.256		ENSG00000111252(SH2B3)	1.97719	1.13313	2.29698	5.4392		ENSG00000102098(SCML2)	6.6072	7.98469
ENSG00000075790(BCAP29)	26.1904	46.4006		ENSG00000111269(CREBL2)	10.7261	2.81324	16.0879	8.41037		ENSG00000102100(SLC35A2)	44.12	51.4576
ENSG00000075826(SEC31B)	0.441013	0.311316		ENSG00000111319(SCNN1A)	52.2969	54.2412	1.64663	7.45806		ENSG00000102109(PCSK1N)	0.0749572	0
ENSG00000075856(SART3)	25.8844	20.4939		ENSG00000111321(LTBR)	18.2781	27.6872	72.6756	263.799		ENSG00000102144(PGK1)	613.679	282.239
ENSG00000075914(EXOSC7)	15.7833	23.3886		ENSG00000111328(CDK2AP1)	89.0931	25.8151	98.3454	14.8197		ENSG00000102158(MAGT1)	43.9745	22.9018
ENSG00000075945(KIFAP3)	4.57452	2.63417		ENSG00000111331(OAS3)	7.6894	17.725	49.6073	98.3502		ENSG00000102174(PHEX)	0.0417528	0.0183643
ENSG00000075975(MKRN2)	18.8174	17.0837		ENSG00000111335(OAS2)	3.30479	2.35761	8.89193	42.574		ENSG00000102218(RP2)	16.3903	12.5863
ENSG00000076003(MCM6)	56.889	40.7609		ENSG00000111341(MGP)	714.996	558.026	0	0		ENSG00000102221(JADE3)	15.8515	4.28934
ENSG00000076043(REXO2)	16.3929	12.0104		ENSG00000111344(RASAL1)	2.59238	1.69935	0.200639	1.04743		ENSG00000102226(USP11)	45.6868	88.0007
ENSG00000076053(RBM7)	8.30386	6.87274		ENSG00000111371(SLC38A1)	73.2921	39.8289	104.208	41.5214		ENSG00000102239(BRS3)	0	0
ENSG00000076067(RBMS2)	0.949461	0.470957		ENSG00000111412(C12orf49)	7.42816	3.8594	9.21338	6.93266		ENSG00000102243(VGLL1)	0	0
ENSG00000076108(BAZ2A)	27.9978	28.9409		ENSG00000111424(VDR)	16.2067	11.878	2.01032	3.4256		ENSG00000102265(TIMP1)	354.912	466.636
ENSG00000076201(PTPN23)	10.6313	10.1666		ENSG00000111432(FZD10)	0	0	0.0251329	0.100759		ENSG00000102271(KLHL4)	2.35256	0.547998
ENSG00000076242(MLH1)	18.6465	14.4561		ENSG00000111445(RFC5)	19.2038	10.6537	28.7962	4.40932		ENSG00000102287(GABRE)	16.3463	19.7858
ENSG00000076248(UNG)	82.2169	40.9566		ENSG00000111602(TIMELESS)	17.6465	15.686	27.068	4.40668		ENSG00000102312(PORCN)	10.7356	11.8128
ENSG00000076321(KLHL20)	6.45242	5.34102		ENSG00000111652(COPS7A)	22.3398	18.0083	43.2809	18.0322		ENSG00000102317(RBM3)	69.914	200.271
ENSG00000076351(SLC46A1)	5.74095	4.91978		ENSG00000111653(ING4)	23.9666	9.69198	4.50217	12.6196		ENSG00000102349(KLF8)	0	0
ENSG00000076356(PLXNA2)	0.682811	0.751434		ENSG00000111665(CDCA3)	12.9647	4.83105	23.2201	0.782984		ENSG00000102359(SRPX2)	0.419616	0.623462
ENSG00000076382(SPAG5)	28.5648	23.8768		ENSG00000111670(GNPTAB)	16.7311	7.00981	7.74178	3.24603		ENSG00000102384(CENPI)	12.1803	17.5826
ENSG00000076513(ANKRD13A)	5.93277	2.81726		ENSG00000111678(C12orf57)	152.335	233.376	294.874	512.074		ENSG00000102385(DRP2)	0.188643	0.0371677
ENSG00000076554(TPD52)	139.051	156.852		ENSG00000111679(PTPN6)	12.0883	12.4426	4.46426	22.0747		ENSG00000102387(TAF7L)	0.0262405	0.352905
ENSG00000076555(ACACB)	6.69125	1.86906		ENSG00000111728(ST8SIA1)	7.28873	4.83118	0	0.5532		ENSG00000102452(NALCN)	1.15492	0.655444
ENSG00000076604(TRAF4)	39.6654	64.0315		ENSG00000111729(CLEC4A)	0.491792	0.719441	0.0730605	0.798115		ENSG00000102471(NDFIP2)	53.8167	20.9933
ENSG00000076641(PAG1)	0.187405	0.10882		ENSG00000111731(C2CD5)	10.3495	5.01618	9.61952	4.80904		ENSG00000102531(FNDC3A)	62.3301	20.9164
ENSG00000076650(GPATCH1)	4.68664	3.59677		ENSG00000111786(SRSF9)	61.9949	28.1072	161.216	47.6093		ENSG00000102547(CAB39L)	2.62482	2.49107
ENSG00000076662(ICAM3)	7.41258	12.1166		ENSG00000111799(COL12A1)	0.0641092	0.0602043	4.31481	2.78961		ENSG00000102554(KLF5)	74.1499	28.7507
ENSG00000076685(NT5C2)	24.7618	28.0863		ENSG00000111801(BTN3A3)	5.46806	2.36236	1.20396	5.65369		ENSG00000102575(ACP5)	0.0386396	1.52968
ENSG00000076716(GPC4)	4.32273	4.14322		ENSG00000111817(DSE)	2.84125	1.45488	2.1703	4.57187		ENSG00000102580(DNAJC3)	15.7617	8.96832
ENSG00000076770(MBNL3)	8.52195	9.6094		ENSG00000111832(RWDD1)	65.6628	21.67	25.0272	9.07907		ENSG00000102738(MRPS31)	9.41263	14.984
ENSG00000076826(CAMSAP3)	14.4267	11.7941		ENSG00000111837(MAK)	0.48117	0.97523	0.153839	0.166006		ENSG00000102743(SLC25A15)	8.7971	2.5869
ENSG00000076864(RAP1GAP)	4.28866	8.64314		ENSG00000111845(PAK1IP1)	36.3379	18.3125	16.5841	4.72146		ENSG00000102753(KPNA3)	17.3385	4.71851
ENSG00000076924(XAB2)	17.0576	15.1595		ENSG00000111860(CEP85L)	1.28486	1.47442	0.972614	3.08247		ENSG00000102755(FLT1)	0	0.0733215
ENSG00000076928(ARHGEF1)	19.846	22.3811		ENSG00000111877(MCM9)	10.3624	18.667	4.13908	1.82638		ENSG00000102760(RGCC)	0	0.205559
ENSG00000076944(STXBP2)	48.2732	80.0041		ENSG00000111879(FAM184A)	3.21612	13.741	0	0.0822025		ENSG00000102780(DGKH)	2.80142	7.46138
ENSG00000076984(MAP2K7)	11.7012	12.2007		ENSG00000111880(RNGTT)	17.1653	9.35194	9.21921	4.591		ENSG00000102781(KATNAL1)	2.34153	3.90736
ENSG00000077044(DGKD)	7.07609	7.21836		ENSG00000111885(MAN1A1)	31.9028	5.74737	0.531113	1.24403		ENSG00000102804(TSC22D1)	121.322	30.1866
ENSG00000077097(TOP2B)	53.7243	40.2721		ENSG00000111897(SERINC1)	77.1596	27.42	41.3708	31.0121		ENSG00000102837(OLFM4)	0	0
ENSG00000077147(TM9SF3)	66.6015	41.8395		ENSG00000111911(HINT3)	34.4439	12.0361	17.3426	8.59434		ENSG00000102870(ZNF629)	3.90525	4.60254
ENSG00000077150(NFKB2)	16.4245	25.5433		ENSG00000111912(NCOA7)	86.175	34.7652	102.141	98.1631		ENSG00000102879(CORO1A)	0.200989	0.828199
ENSG00000077152(UBE2T)	70.1442	74.3634		ENSG00000111913(FAM65B)	2.64922	2.60289	0	0.727993		ENSG00000102886(GDPD3)	2.07627	6.44926
ENSG00000077157(PPP1R12B)	4.17276	4.08399		ENSG00000111981(ULBP1)	3.82128	10.677	0.470308	1.21772		ENSG00000102893(PHKB)	17.8183	9.76898
ENSG00000077232(DNAJC10)	28.2133	36.3544		ENSG00000112078(KCTD20)	18.87	9.71768	12.2482	10.1993		ENSG00000102935(ZNF423)	0.0390178	0
ENSG00000077235(GTF3C1)	23.8666	26.5378		ENSG00000112081(SRSF3)	157.759	80.0218	156.972	43.1039		ENSG00000102962(CCL22)	0.13481	0.890534
ENSG00000077238(IL4R)	4.68678	4.80724		ENSG00000112096(SOD2)	71.8235	142.792	161.053	547.491		ENSG00000102967(DHODH)	5.92827	13.9118
ENSG00000077254(USP33)	11.6913	10.9722		ENSG00000112139(MDGA1)	0.442399	1.94108	1.54698	4.41056		ENSG00000102974(CTCF)	14.1495	13.1416
ENSG00000077312(SNRPA)	55.5258	60.2691		ENSG00000112144(ICK)	13.1345	3.29603	2.61201	1.75147		ENSG00000102981(PARD6A)	3.24688	17.0778
ENSG00000077348(EXOSC5)	29.5423	29.0651		ENSG00000112149(CD83)	3.47308	13.029	0.638583	2.30943		ENSG00000102996(MMP15)	8.37281	29.4685
ENSG00000077380(DYNC1I2)	33.2772	27.5264		ENSG00000112167(SAYSD1)	16.0694	8.28279	8.15591	1.48431		ENSG00000103005(USB1)	24.9881	13.8774
ENSG00000077454(LRCH4)	30.6952	29.2758		ENSG00000112175(BMP5)	3.71637	7.64099	1.62703	0.60661		ENSG00000103021(CCDC113)	4.58324	4.68531
ENSG00000077458(FAM76B)	4.83859	4.27572		ENSG00000112186(CAP2)	34.0305	10.9153	10.4834	4.23459		ENSG00000103034(NDRG4)	0.173669	0.467238
ENSG00000077463(SIRT6)	12.5372	12.8226		ENSG00000112208(BAG2)	3.23273	2.53076	8.12892	3.30049		ENSG00000103043(VAC14)	14.3296	47.9901
ENSG00000077514(POLD3)	19.9956	16.5761		ENSG00000112237(CCNC)	97.8519	23.2425	30.2056	10.8334		ENSG00000103044(HAS3)	0.678442	2.74093
ENSG00000077549(CAPZB)	139.831	197.809		ENSG00000112245(PTP4A1)	68.0965	72.95	314.627	121.946		ENSG00000103089(FA2H)	5.66761	12.767
ENSG00000077585(GPR137B)	10.9207	8.61562		ENSG00000112293(GPLD1)	2.8035	2.02906	0.314666	0.165384		ENSG00000103150(MLYCD)	5.36025	24.1386
ENSG00000077684(JADE1)	5.97623	3.34602		ENSG00000112294(ALDH5A1)	22.7616	8.95285	8.02826	3.32654		ENSG00000103175(WFDC1)	83.6198	45.371
ENSG00000077713(SLC25A43)	23.5406	15.2068		ENSG00000112299(VNN1)	2.40049	4.76728	0.455474	7.43203		ENSG00000103187(COTL1)	107.636	100.973
ENSG00000077721(UBE2A)	56.5709	57.8371		ENSG00000112305(SMAP1)	22.839	6.48495	15.7877	7.40966		ENSG00000103227(LMF1)	2.67412	5.47027
ENSG00000077782(FGFR1)	5.94451	4.36542		ENSG00000112308(C6orf62)	98.5795	43.9012	49.9835	19.7807		ENSG00000103241(FOXF1)	14.5697	5.82326
ENSG00000077942(FBLN1)	1.25087	0.280034		ENSG00000112312(GMNN)	93.1265	46.5433	30.2801	7.71782		ENSG00000103249(CLCN7)	21.7218	78.5889
ENSG00000078018(MAP2)	0.439426	0.696232		ENSG00000112319(EYA4)	0	0	7.57159	5.14366		ENSG00000103254(FAM173A)	61.8456	113.464
ENSG00000078043(PIAS2)	5.34972	5.32889		ENSG00000112320(SOBP)	0.228627	0.676461	0.247867	0.23317		ENSG00000103257(SLC7A5)	479.281	123.914
ENSG00000078053(AMPH)	0.348111	0.455131		ENSG00000112343(TRIM38)	22.909	13.5551	2.36913	7.53539		ENSG00000103313(MEFV)	0.161658	0.0860444
ENSG00000078061(ARAF)	28.3041	25.1104		ENSG00000112379(ARFGEF3)	10.1395	13.7847	4.19126	4.9642		ENSG00000103316(CRYM)	0.229283	1.18843
ENSG00000078070(MCCC1)	13.0888	12.6429		ENSG00000112394(SLC16A10)	1.81099	4.24622	0.266855	1.89367		ENSG00000103319(EEF2K)	8.81598	4.15076
ENSG00000078081(LAMP3)	0.761894	0.253251		ENSG00000112406(HECA)	11.4404	13.4428	0.88432	4.24892		ENSG00000103326(CAPN15)	14.2454	39.5878
ENSG00000078114(NEBL)	15.6904	9.84688		ENSG00000112414(ADGRG6)	8.07011	7.18677	28.6757	10.0049		ENSG00000103363(ELOB)	134.115	355.666
ENSG00000078124(ACER3)	9.70233	11.5662		ENSG00000112419(PHACTR2)	7.8117	4.18384	7.8624	6.0546		ENSG00000103415(HMOX2)	18.1213	72.9048
ENSG00000078140(UBE2K)	39.7957	51.6392		ENSG00000112531(QKI)	28.4188	7.64808	39.5061	19.9242		ENSG00000103449(SALL1)	0.0108344	0
ENSG00000078142(PIK3C3)	2.68116	2.0433		ENSG00000112559(MDFI)	5.99367	25.1622	0.301953	0.40768		ENSG00000103460(TOX3)	0	0.0308882
ENSG00000078177(N4BP2)	3.71802	3.34846		ENSG00000112576(CCND3)	35.6441	54.483	177.665	60.2256		ENSG00000103479(RBL2)	12.4908	2.73909
ENSG00000078237(TIGAR)	8.01381	13.0938		ENSG00000112599(GUCA1B)	0.476027	0.120924	0.663562	0.891056		ENSG00000103485(QPRT)	60.4153	84.5823
ENSG00000078246(TULP3)	10.2154	7.18619		ENSG00000112697(TMEM30A)	61.9251	22.9453	60.2571	74.5427		ENSG00000103489(XYLT1)	1.77846	1.8708
ENSG00000078269(SYNJ2)	8.0595	8.06765		ENSG00000112706(IMPG1)	0.310243	0.488713	0.115715	0.183147		ENSG00000103490(PYCARD)	0.108885	0.293427
ENSG00000078304(PPP2R5C)	84.3211	74.6579		ENSG00000112715(VEGFA)	93.6855	77.6157	19.6201	69.5396		ENSG00000103494(RPGRIP1L)	3.59449	4.79294
ENSG00000078369(GNB1)	151.76	117.494		ENSG00000112742(TTK)	39.086	35.7243	14.6233	2.23533		ENSG00000103522(IL21R)	0.0445033	0.147423
ENSG00000078399(HOXA9)	1.07769	1.26509		ENSG00000112759(SLC29A1)	12.5895	68.9605	26.6893	18.7589		ENSG00000103534(TMC5)	9.60168	3.5472
ENSG00000078401(EDN1)	3.53916	2.582		ENSG00000112769(LAMA4)	14.7095	45.6824	8.63525	7.73557		ENSG00000103540(CCP110)	11.0501	9.52005
ENSG00000078403(MLLT10)	13.5282	14.4112		ENSG00000112782(CLIC5)	1.87598	0.918048	0	0.110949		ENSG00000103546(SLC6A2)	0.0323146	0
ENSG00000078487(ZCWPW1)	1.68954	1.06707		ENSG00000112787(FBRSL1)	10.2853	28.3591	21.2928	20.5213		ENSG00000103569(AQP9)	0	0
ENSG00000078618(NRDC)	52.148	54.4947		ENSG00000112796(ENPP5)	6.47102	1.99002	0	0		ENSG00000103647(CORO2B)	0.0242188	0.0409512
ENSG00000078668(VDAC3)	61.9855	53.8159		ENSG00000112812(PRSS16)	38.2567	35.4604	3.47769	2.34426		ENSG00000103707(MTFMT)	8.76062	11.6576
ENSG00000078674(PCM1)	15.1274	16.2141		ENSG00000112837(TBX18)	0	0	26.633	21.1203		ENSG00000103723(AP3B2)	0.0262257	0.723625
ENSG00000078687(TNRC6C)	3.80339	4.47787		ENSG00000112874(NUDT12)	8.79535	2.34478	2.33924	2.20947		ENSG00000103742(IGDCC4)	0.0308463	0.1372
ENSG00000078699(CBFA2T2)	5.92809	5.87072		ENSG00000112902(SEMA5A)	0	0	0.027121	0.00704413		ENSG00000103811(CTSH)	0.0219187	0.21975
ENSG00000078747(ITCH)	13.577	13.0769		ENSG00000112972(HMGCS1)	116.127	50.0274	56.4956	26.6139		ENSG00000103855(CD276)	37.1667	147.345
ENSG00000078804(TP53INP2)	1.75245	2.8511		ENSG00000112984(KIF20A)	40.8892	15.5171	28.379	1.77239		ENSG00000103888(CEMIP)	23.3665	5.38912
ENSG00000078808(SDF4)	95.6158	122.728		ENSG00000112992(NNT)	27.159	5.71091	15.432	6.42988		ENSG00000103966(EHD4)	13.098	7.92869
ENSG00000078900(TP73)	1.57417	1.74871		ENSG00000113048(MRPS27)	24.6157	4.74139	58.8856	12.7443		ENSG00000103978(TMEM87A)	30.57	15.4046
ENSG00000078902(TOLLIP)	10.5943	11.6773		ENSG00000113070(HBEGF)	1.09141	7.128	1.5321	7.79794		ENSG00000104043(ATP8B4)	1.14723	0.674923
ENSG00000078967(UBE2D4)	3.32621	1.86277		ENSG00000113083(LOX)	4.4245	4.3588	0.428802	3.5946		ENSG00000104044(OCA2)	0	0
ENSG00000079134(THOC1)	11.0678	10.1361		ENSG00000113194(FAF2)	28.9492	19.7442	26.2986	16.5364		ENSG00000104047(DTWD1)	38.1487	9.123
ENSG00000079156(OSBPL6)	0.597233	0.607259		ENSG00000113196(HAND1)	0.0766995	0.331308	0.162372	2.89855		ENSG00000104059(FAM189A1)	0	0
ENSG00000079246(XRCC5)	156.304	151.14		ENSG00000113231(PDE8B)	1.67047	0.657914	9.69234	4.49023		ENSG00000104064(GABPB1)	19.5752	27.2722
ENSG00000079257(LXN)	127.505	239.807		ENSG00000113248(PCDHB15)	1.51996	1.95278	0.153159	1.07943		ENSG00000104067(TJP1)	20.8685	9.61458
ENSG00000079277(MKNK1)	14.2689	14.4845		ENSG00000113249(HAVCR1)	0	0.041267	45.2853	12.8243		ENSG00000104081(BMF)	1.35373	1.54712
ENSG00000079308(TNS1)	0.439395	0.276434		ENSG00000113273(ARSB)	2.9909	3.28826	9.27536	6.64459		ENSG00000104131(EIF3J)	54.1745	50.6675
ENSG00000079313(REXO1)	24.4321	27.4589		ENSG00000113319(RASGRF2)	0.186185	0.250437	0.0489029	0.475913		ENSG00000104140(RHOV)	15.2803	35.949
ENSG00000079335(CDC14A)	2.09918	4.21639		ENSG00000113368(LMNB1)	56.5864	164.869	62.5167	21.2975		ENSG00000104142(VPS18)	7.88195	64.3429
ENSG00000079337(RAPGEF3)	0.219874	1.11626		ENSG00000113369(ARRDC3)	25.5672	9.6741	23.1255	93.0781		ENSG00000104147(OIP5)	23.5789	6.11606
ENSG00000079387(SENP1)	9.46705	5.20207		ENSG00000113391(FAM172A)	15.2071	5.52212	8.27318	3.06042		ENSG00000104154(SLC30A4)	1.49216	2.97888
ENSG00000079432(CIC)	12.6906	10.672		ENSG00000113430(IRX4)	0	0	0.128704	0.687243		ENSG00000104164(BLOC1S6)	60.8006	67.1579
ENSG00000079459(FDFT1)	66.1517	46.392		ENSG00000113441(LNPEP)	9.71105	3.54843	13.015	6.96416		ENSG00000104177(MYEF2)	0.0131913	0
ENSG00000079462(PAFAH1B3)	41.6561	46.0515		ENSG00000113460(BRIX1)	24.5618	74.8081	35.8394	79.6672		ENSG00000104213(PDGFRL)	3.74619	6.82711
ENSG00000079482(OPHN1)	5.23139	5.69565		ENSG00000113494(PRLR)	12.1116	12.2646	0.0498368	0.231033		ENSG00000104219(ZDHHC2)	26.6447	5.89401
ENSG00000079616(KIF22)	79.2265	61.8081		ENSG00000113552(GNPDA1)	15.9942	7.34402	18.4626	2.47751		ENSG00000104221(BRF2)	5.56365	20.2296
ENSG00000079691(CARMIL1)	6.2382	5.68688		ENSG00000113555(PCDH12)	0.158103	0.0430777	0.150956	2.29811		ENSG00000104267(CA2)	0.0888258	0
ENSG00000079739(PGM1)	0.582772	1.12862		ENSG00000113580(NR3C1)	7.65963	7.71884	40.4757	22.1704		ENSG00000104312(RIPK2)	16.8035	23.5422
ENSG00000079785(DDX1)	64.6069	57.3758		ENSG00000113583(C5orf15)	49.1131	10.6067	39.7375	33.9336		ENSG00000104321(TRPA1)	0.0719797	0.0226907
ENSG00000079805(DNM2)	64.0603	67.4078		ENSG00000113595(TRIM23)	3.89881	2.12112	5.07942	5.12488		ENSG00000104327(CALB1)	0.79032	0.378343
ENSG00000079819(EPB41L2)	6.90333	6.47279		ENSG00000113638(TTC33)	11.8159	4.13541	9.27098	4.38358		ENSG00000104331(IMPAD1)	33.1959	9.3606
ENSG00000079950(STX7)	8.45225	6.55971		ENSG00000113645(WWC1)	53.242	32.9755	63.937	19.0839		ENSG00000104332(SFRP1)	0.0334923	0.0293378
ENSG00000079974(RABL2B)	5.93806	6.06523		ENSG00000113648(H2AFY)	107.524	39.9286	103.867	20.4179		ENSG00000104341(LAPTM4B)	135.835	118.719
ENSG00000079999(KEAP1)	41.9985	46.4444		ENSG00000113719(ERGIC1)	125.899	20.8845	72.6962	25.3578		ENSG00000104343(UBE2W)	15.9373	7.1863
ENSG00000080007(DDX43)	1.75295	1.61432		ENSG00000113739(STC2)	30.1336	80.2326	14.1558	24.6666		ENSG00000104356(POP1)	4.39191	10.1188
ENSG00000080031(PTPRH)	0.0217479	0.250219		ENSG00000113742(CPEB4)	26.5898	22.0813	15.7473	32.4773		ENSG00000104361(NIPAL2)	1.97401	2.46666
ENSG00000080189(SLC35C2)	33.8382	31.753		ENSG00000113749(HRH2)	0	0	0.53659	0.529316		ENSG00000104368(PLAT)	3.05948	1.36663
ENSG00000080224(EPHA6)	1.52326	1.13709		ENSG00000113763(UNC5A)	4.01866	11.4598	0	0.204946		ENSG00000104381(GDAP1)	6.88982	6.28601
ENSG00000080298(RFX3)	1.26363	1.78906		ENSG00000113790(EHHADH)	2.69862	0.333469	2.85833	1.39537		ENSG00000104412(EMC2)	12.6709	7.11924
ENSG00000080345(RIF1)	17.0079	13.0736		ENSG00000113810(SMC4)	62.8771	51.4087	123.498	19.7346		ENSG00000104415(WISP1)	0	0
ENSG00000080371(RAB21)	11.1401	8.40613		ENSG00000113916(BCL6)	40.5654	26.7276	3.91061	22.9012		ENSG00000104419(NDRG1)	155.174	11.1416
ENSG00000080503(SMARCA2)	9.15038	7.99573		ENSG00000113924(HGD)	0.426959	0.43906	14.7102	58.7776		ENSG00000104472(CHRAC1)	35.8877	26.966
ENSG00000080546(SESN1)	8.764	14.0885		ENSG00000114019(AMOTL2)	44.6487	30.9111	24.1602	14.4627		ENSG00000104490(NCALD)	0	0
ENSG00000080561(MID2)	9.9924	14.0859		ENSG00000114023(FAM162A)	29.6443	39.8327	21.3558	57.0146		ENSG00000104497(SNX16)	3.91238	12.1922
ENSG00000080573(COL5A3)	0.14276	0.120129		ENSG00000114054(PCCB)	26.178	8.6017	30.3756	22.9721		ENSG00000104524(PYCRL)	5.48147	5.81785
ENSG00000080603(SRCAP)	97.0808	108.951		ENSG00000114107(CEP70)	21.4823	9.29367	4.89771	4.67311		ENSG00000104537(ANXA13)	0	0
ENSG00000080608(PUM3)	14.5382	14.8974		ENSG00000114127(XRN1)	9.9978	4.54136	6.1401	6.67313		ENSG00000104626(ERI1)	16.267	10.5821
ENSG00000080644(CHRNA3)	0.478782	0.583878		ENSG00000114166(KAT2B)	1.70332	0.449677	5.36628	1.44661		ENSG00000104635(SLC39A14)	66.9263	26.2485
ENSG00000080802(CNOT4)	10.6921	12.5198		ENSG00000114209(PDCD10)	72.0611	16.338	34.2204	19.3121		ENSG00000104689(TNFRSF10A)	14.432	55.1219
ENSG00000080815(PSEN1)	36.3024	37.9769		ENSG00000114248(LRRC31)	0	0.230142	0	0.132034		ENSG00000104695(PPP2CB)	38.6452	10.0105
ENSG00000080819(CPOX)	8.01034	2.95785		ENSG00000114251(WNT5A)	1.74419	1.5733	1.20718	2.34576		ENSG00000104722(NEFM)	0.0417891	0.0244652
ENSG00000080822(CLDND1)	18.0543	15.6839		ENSG00000114268(PFKFB4)	8.37901	7.97651	4.84816	10.0372		ENSG00000104723(TUSC3)	0.50907	0.917217
ENSG00000080823(MOK)	4.00501	4.14181		ENSG00000114270(COL7A1)	1.14078	1.62826	77.1334	85.3017		ENSG00000104738(MCM4)	76.3043	140.855
ENSG00000080824(HSP90AA1)	882.516	1203.28		ENSG00000114302(PRKAR2A)	13.4676	6.31316	21.0828	3.95029		ENSG00000104756(KCTD9)	28.9139	10.4274
ENSG00000080839(RBL1)	6.65981	5.36859		ENSG00000114346(ECT2)	55.0529	21.4902	101.389	34.0392		ENSG00000104763(ASAH1)	51.36	75.4306
ENSG00000080845(DLGAP4)	15.9084	15.5652		ENSG00000114378(HYAL1)	0.300683	0.541364	6.01256	6.57655		ENSG00000104765(BNIP3L)	33.6662	13.1324
ENSG00000080854(IGSF9B)	1.90201	1.18472		ENSG00000114383(TUSC2)	10.5884	10.3951	13.9987	14.7092		ENSG00000104783(KCNN4)	35.6994	59.5041
ENSG00000080986(NDC80)	15.7738	10.0114		ENSG00000114405(C3orf14)	23.9418	35.9343	21.2148	7.38341		ENSG00000104825(NFKBIB)	13.0991	75.2294
ENSG00000081014(AP4E1)	13.811	8.90516		ENSG00000114423(CBLB)	5.17399	6.83162	6.38408	20.6821		ENSG00000104833(TUBB4A)	0.289216	0.031742
ENSG00000081019(RSBN1)	12.9677	10.25		ENSG00000114450(GNB4)	12.1263	4.42976	7.05892	2.53966		ENSG00000104870(FCGRT)	0.0975555	0.0600397
ENSG00000081026(MAGI3)	12.8638	8.91762		ENSG00000114455(HHLA2)	0	0.0847256	0.0523338	2.96031		ENSG00000104872(PIH1D1)	56.0306	32.0642
ENSG00000081087(OSTM1)	8.64699	10.3806		ENSG00000114480(GBE1)	10.8517	2.93845	47.0297	30.8004		ENSG00000104881(PPP1R13L)	47.2119	78.0639
ENSG00000081154(PCNP)	53.9506	67.3081		ENSG00000114529(C3orf52)	1.19998	4.1065	4.31311	6.4541		ENSG00000104884(ERCC2)	16.2531	12.02
ENSG00000081177(EXD2)	14.4535	15.6919		ENSG00000114541(FRMD4B)	4.55518	3.125	0.967334	4.20035		ENSG00000104888(SLC17A7)	0.0528467	0.117169
ENSG00000081181(ARG2)	0.908212	2.95515		ENSG00000114554(PLXNA1)	15.5998	14.3768	9.89439	11.2864		ENSG00000104889(RNASEH2A)	95.1921	207.55
ENSG00000081277(PKP1)	13.5968	11.8144		ENSG00000114573(ATP6V1A)	31.1178	4.5328	26.6797	9.41258		ENSG00000104892(KLC3)	0.802679	1.67954
ENSG00000081307(UBA5)	25.8015	18.2075		ENSG00000114646(CSPG5)	3.84415	8.60629	0.341346	1.06954		ENSG00000104907(TRMT1)	38.5131	127.583
ENSG00000081320(STK17B)	5.08254	4.36896		ENSG00000114737(CISH)	4.89056	4.30255	3.17988	3.33782		ENSG00000104946(TBC1D17)	11.1271	29.5278
ENSG00000081377(CDC14B)	1.11106	0.719825		ENSG00000114738(MAPKAPK3)	25.8502	10.2204	21.5593	5.73262		ENSG00000104953(TLE6)	2.90391	2.97482
ENSG00000081386(ZNF510)	24.6682	16.3484		ENSG00000114744(COMMD2)	25.898	11.8207	16.796	8.80463		ENSG00000104967(NOVA2)	0.0130956	0
ENSG00000081479(LRP2)	0.43905	0.680841		ENSG00000114771(AADAC)	0.0497024	0.00586408	16.185	13.6071		ENSG00000104969(SGTA)	19.5391	95.2497
ENSG00000081665(ZNF506)	0.893834	1.25637		ENSG00000114796(KLHL24)	10.4409	12.8335	2.34898	11.237		ENSG00000104980(TIMM44)	16.4258	35.8945
ENSG00000081692(JMJD4)	8.15562	8.72552		ENSG00000114812(VIPR1)	24.3137	6.88783	0.651222	0.24415		ENSG00000105011(ASF1B)	43.0979	52.9388
ENSG00000081721(DUSP12)	11.133	10.8236		ENSG00000114841(DNAH1)	0.683399	0.538825	0.242164	1.13363		ENSG00000105048(TNNT1)	9.1426	23.408
ENSG00000081760(AACS)	30.1861	26.866		ENSG00000114854(TNNC1)	5.57497	1.88079	0.673779	0.128325		ENSG00000105088(OLFM2)	0.349533	0
ENSG00000081791(KIAA0141)	22.5784	25.1678		ENSG00000114902(SPCS1)	61.9634	10.4822	126.641	34.5553		ENSG00000105136(ZNF419)	1.75225	5.38107
ENSG00000081803(CADPS2)	5.50705	5.38788		ENSG00000114904(NEK4)	6.65475	4.24592	7.66482	2.25329		ENSG00000105137(SYDE1)	51.4933	65.9025
ENSG00000081818(PCDHB4)	0.887429	0.926365		ENSG00000114978(MOB1A)	52.5193	19.7499	48.9334	15.3989		ENSG00000105141(CASP14)	0.548624	0
ENSG00000081842(PCDHA6)	17.7871	26.1661		ENSG00000114993(RTKN)	24.2594	56.379	3.73506	6.2538		ENSG00000105143(SLC1A6)	0	0
ENSG00000081853(PCDHGA2)	25.3201	35.9104		ENSG00000115008(IL1A)	0	0	1.31337	15.2772		ENSG00000105173(CCNE1)	6.52423	11.0418
ENSG00000081870(HSPB11)	25.7539	21.6439		ENSG00000115009(CCL20)	0.582664	1.8298	2.59377	97.5244		ENSG00000105185(PDCD5)	84.2888	218.139
ENSG00000081913(PHLPP1)	3.56703	2.12616		ENSG00000115084(SLC35F5)	21.8271	8.89969	19.6957	8.17277		ENSG00000105193(RPS16)	1592.74	2175.34
ENSG00000081923(ATP8B1)	14.5527	11.2349		ENSG00000115112(TFCP2L1)	35.5401	18.9242	2.11576	2.70472		ENSG00000105204(DYRK1B)	1.55244	4.78657
ENSG00000082014(SMARCD3)	2.13615	2.42664		ENSG00000115159(GPD2)	19.8842	7.64181	20.5678	8.23137		ENSG00000105219(CNTD2)	0.521439	16.5612
ENSG00000082068(WDR70)	10.402	5.60803		ENSG00000115163(CENPA)	27.267	9.10549	15.6014	0.754044		ENSG00000105220(GPI)	273.599	454.792
ENSG00000082146(STRADB)	7.28199	13.3573		ENSG00000115221(ITGB6)	29.2936	9.20038	2.2506	0.421286		ENSG00000105223(PLD3)	80.3853	181.087
ENSG00000082153(BZW1)	197.428	166.124		ENSG00000115234(SNX17)	50.4611	15.9987	55.0201	24.8342		ENSG00000105227(PRX)	1.16132	1.51406
ENSG00000082175(PGR)	22.7623	5.15068		ENSG00000115252(PDE1A)	0.117987	0	0.382778	1.57659		ENSG00000105246(EBI3)	2.08939	1.52872
ENSG00000082196(C1QTNF3)	6.01059	6.59862		ENSG00000115266(APC2)	0.128332	0.21398	0.683643	0.400397		ENSG00000105258(POLR2I)	19.2256	35.8643
ENSG00000082212(ME2)	5.55414	4.24438		ENSG00000115267(IFIH1)	9.23117	15.883	11.2458	36.4305		ENSG00000105270(CLIP3)	1.51098	5.82404
ENSG00000082213(C5orf22)	11.3105	9.74868		ENSG00000115289(PCGF1)	14.8779	20.1695	10.6849	37.6646		ENSG00000105281(SLC1A5)	164.748	246.161
ENSG00000082258(CCNT2)	16.5314	15.755		ENSG00000115318(LOXL3)	2.14853	8.87994	0.755779	1.07633		ENSG00000105289(TJP3)	0.455395	0.387758
ENSG00000082438(COBLL1)	12.7754	9.83039		ENSG00000115325(DOK1)	1.37377	4.44823	1.71994	3.69254		ENSG00000105290(APLP1)	0.851049	4.93041
ENSG00000082458(DLG3)	13.4453	15.2323		ENSG00000115363(EVA1A)	27.5337	12.8122	1.20294	1.86623		ENSG00000105321(CCDC9)	14.2841	61.0395
ENSG00000082482(KCNK2)	19.0315	8.81069		ENSG00000115365(LANCL1)	20.8753	4.09174	58.1108	16.1995		ENSG00000105327(BBC3)	8.54241	36.2207
ENSG00000082497(SERTAD4)	3.65935	1.51912		ENSG00000115380(EFEMP1)	14.3808	1.66775	45.2043	17.0925		ENSG00000105329(TGFB1)	47.675	58.4822
ENSG00000082512(TRAF5)	23.8821	22.009		ENSG00000115414(FN1)	21.6417	13.9124	87.9949	296.97		ENSG00000105339(DENND3)	4.45249	3.08483
ENSG00000082515(MRPL22)	33.3642	40.0115		ENSG00000115415(STAT1)	59.1161	8.4291	55.453	67.0321		ENSG00000105357(MYH14)	0.0128024	0
ENSG00000082516(GEMIN5)	15.9309	16.5488		ENSG00000115419(GLS)	16.2013	10.2179	103.039	39.6654		ENSG00000105372(RPS19)	1207.9	2463.53
ENSG00000082641(NFE2L1)	64.5432	107.076		ENSG00000115461(IGFBP5)	102.988	12.9182	0.24711	11.5242		ENSG00000105373(GLTSCR2)	88.0877	149.551
ENSG00000082701(GSK3B)	25.5895	23.4581		ENSG00000115464(USP34)	38.6282	28.5697	21.8971	18.3729		ENSG00000105376(ICAM5)	0.259793	0.388471
ENSG00000082781(ITGB5)	58.409	52.5722		ENSG00000115484(CCT4)	116.463	75.5838	179.735	59.4575		ENSG00000105379(ETFB)	95.8854	134.1
ENSG00000082805(ERC1)	5.38837	4.90215		ENSG00000115507(OTX1)	2.18069	5.10176	1.17219	7.48656		ENSG00000105409(ATP1A3)	0.0916366	0.224508
ENSG00000082898(XPO1)	116.997	85.4899		ENSG00000115524(SF3B1)	112.704	25.8399	43.8865	21.5298		ENSG00000105419(MEIS3)	1.61051	4.37764
ENSG00000082996(RNF13)	21.3075	31.9946		ENSG00000115548(KDM3A)	14.699	13.7992	6.17738	24.8119		ENSG00000105427(CNFN)	7.78812	32.9542
ENSG00000083093(PALB2)	6.88362	8.0631		ENSG00000115594(IL1R1)	9.25037	6.12206	8.11451	3.40001		ENSG00000105429(MEGF8)	4.36364	7.65652
ENSG00000083097(DOPEY1)	3.36183	2.93818		ENSG00000115596(WNT6)	43.2181	35.4138	0.429633	0.278719		ENSG00000105486(LIG1)	20.1856	21.8135
ENSG00000083099(LYRM2)	21.1142	22.438		ENSG00000115616(SLC9A2)	0.164416	0.0350744	2.89791	0.566536		ENSG00000105497(ZNF175)	1.81627	2.12271
ENSG00000083123(BCKDHB)	10.016	10.0394		ENSG00000115652(UXS1)	15.33	8.78326	24.1049	14.5033		ENSG00000105499(PLA2G4C)	1.92619	5.89532
ENSG00000083168(KAT6A)	6.34306	6.9308		ENSG00000115758(ODC1)	38.3491	22.0275	123.759	15.3996		ENSG00000105516(DBP)	10.4079	9.62665
ENSG00000083223(ZCCHC6)	4.94405	5.19919		ENSG00000115827(DCAF17)	7.23171	5.29105	5.27191	2.26108		ENSG00000105523(FAM83E)	0.0557007	0.0985303
ENSG00000083290(ULK2)	4.58606	1.95775		ENSG00000115828(QPCT)	8.91015	1.80478	10.3362	11.8696		ENSG00000105550(FGF21)	0.617673	0.572083
ENSG00000083307(GRHL2)	34.2169	36.6525		ENSG00000115840(SLC25A12)	10.1917	2.878	17.0428	7.37677		ENSG00000105552(BCAT2)	28.3173	40.501
ENSG00000083312(TNPO1)	51.711	50.07		ENSG00000115844(DLX2)	0.589607	0.69347	0	0.16153		ENSG00000105556(MIER2)	6.94197	16.3592
ENSG00000083444(PLOD1)	17.7148	20.7058		ENSG00000115884(SDC1)	100.896	29.321	61.2435	18.5738		ENSG00000105559(PLEKHA4)	11.6247	9.06069
ENSG00000083454(P2RX5)	0.946983	2.21001		ENSG00000115902(SLC1A4)	7.77799	18.6541	11.0658	4.58493		ENSG00000105605(CACNG7)	0	0.06636
ENSG00000083457(ITGAE)	1.78647	1.92232		ENSG00000115935(WIPF1)	0	0	1.36014	2.45901		ENSG00000105607(GCDH)	18.2065	13.9671
ENSG00000083520(DIS3)	8.15396	5.75433		ENSG00000115970(THADA)	9.32224	8.68154	15.4889	5.61874		ENSG00000105612(DNASE2)	47.8361	123.83
ENSG00000083535(PIBF1)	1.37042	1.20715		ENSG00000116005(PCYOX1)	44.3214	21.25	25.6653	12.8668		ENSG00000105613(MAST1)	5.51202	8.1275
ENSG00000083544(TDRD3)	3.32961	3.17923		ENSG00000116017(ARID3A)	2.98876	7.01646	3.65288	9.89537		ENSG00000105617(LENG1)	7.74509	18.182
ENSG00000083635(NUFIP1)	8.65715	6.25644		ENSG00000116032(GRIN3B)	0.0269711	0.0273837	1.28695	4.04355		ENSG00000105639(JAK3)	0.485217	0.109863
ENSG00000083642(PDS5B)	16.4791	12.922		ENSG00000116035(VAX2)	108.518	42.1714	7.77499	5.87646		ENSG00000105641(SLC5A5)	0	0.180277
ENSG00000083720(OXCT1)	9.51592	8.13056		ENSG00000116095(PLEKHA3)	3.05102	1.55889	2.445	1.33702		ENSG00000105647(PIK3R2)	25.4926	21.5167
ENSG00000083750(RRAGB)	2.31076	4.3322		ENSG00000116106(EPHA4)	3.27922	7.44366	2.2399	6.52828		ENSG00000105649(RAB3A)	2.46296	1.18792
ENSG00000083799(CYLD)	4.15974	1.4153		ENSG00000116161(CACYBP)	60.9425	91.1244	74.6799	23.5978		ENSG00000105655(ISYNA1)	0.390177	2.37665
ENSG00000083807(SLC27A5)	11.8034	13.1874		ENSG00000116171(SCP2)	88.6078	14.8063	51.9046	17.3498		ENSG00000105656(ELL)	6.61922	7.12705
ENSG00000083812(ZNF324)	8.18557	9.70413		ENSG00000116191(RALGPS2)	15.9768	11	8.93914	7.52949		ENSG00000105662(CRTC1)	5.80034	16.3197
ENSG00000083817(ZNF416)	1.40687	1.48305		ENSG00000116199(FAM20B)	21.7236	12.6415	19.5568	5.31726		ENSG00000105672(ETV2)	1.07819	4.83073
ENSG00000083828(ZNF586)	14.6253	14.2569		ENSG00000116213(WRAP73)	11.0933	28.4614	13.5351	9.23509		ENSG00000105676(ARMC6)	18.2116	37.1793
ENSG00000083844(ZNF264)	0.446004	2.43771		ENSG00000116237(ICMT)	44.1839	17.6197	49.9007	9.6325		ENSG00000105696(TMEM59L)	0.222429	0
ENSG00000083845(RPS5)	883.508	1115.29		ENSG00000116254(CHD5)	0.127054	1.42542	0.0747231	0.12852		ENSG00000105699(LSR)	2.79405	6.89821
ENSG00000083857(FAT1)	14.1012	12.5565		ENSG00000116260(QSOX1)	29.2939	54.383	52.1785	95.1727		ENSG00000105732(ZNF574)	3.5464	15.6967
ENSG00000083896(YTHDC1)	26.3845	23.9841		ENSG00000116285(ERRFI1)	47.9503	34.1071	33.1503	142.714		ENSG00000105778(AVL9)	13.3107	9.40933
ENSG00000083937(CHMP2B)	37.3229	59.4887		ENSG00000116299(KIAA1324)	80.3351	29.455	0.326597	0.259135		ENSG00000105784(RUNDC3B)	0	0.0327735
ENSG00000084070(SMAP2)	12.427	16.0255		ENSG00000116396(KCNC4)	8.81115	18.9571	1.38551	2.64658		ENSG00000105808(RASA4)	10.5296	8.27834
ENSG00000084072(PPIE)	27.9043	28.0453		ENSG00000116406(EDEM3)	13.0035	9.99376	13.1656	15.628		ENSG00000105810(CDK6)	25.4337	9.89445
ENSG00000084073(ZMPSTE24)	45.5785	49.6936		ENSG00000116455(WDR77)	40.9759	38.3684	25.4759	9.36226		ENSG00000105821(DNAJC2)	20.1069	57.967
ENSG00000084090(STARD7)	101.583	82.1947		ENSG00000116560(SFPQ)	155.84	102.785	116.499	24.3546		ENSG00000105825(TFPI2)	0	0
ENSG00000084092(NOA1)	14.7498	14.6546		ENSG00000116584(ARHGEF2)	28.7521	54.5912	10.9894	32.6482		ENSG00000105829(BET1)	42.1272	11.8979
ENSG00000084093(REST)	13.367	8.87979		ENSG00000116649(SRM)	36.0791	53.1697	100.489	44.8774		ENSG00000105835(NAMPT)	96.819	89.43
ENSG00000084112(SSH1)	6.11838	3.95948		ENSG00000116661(FBXO2)	6.70732	5.77253	1.01017	28.6031		ENSG00000105852(PON3)	0	0
ENSG00000084234(APLP2)	93.626	75.987		ENSG00000116667(C1orf21)	4.85479	3.92378	0.764497	1.36763		ENSG00000105854(PON2)	109.337	17.9089
ENSG00000084444(FAM234B)	30.6997	21.192		ENSG00000116690(PRG4)	0.00530573	0.0234751	0.687998	2.90814		ENSG00000105855(ITGB8)	14.76	6.67496
ENSG00000084463(WBP11)	27.9345	29.947		ENSG00000116701(NCF2)	0.306245	0.0673995	5.46168	11.5981		ENSG00000105856(HBP1)	24.7588	5.32016
ENSG00000084623(EIF3I)	140.943	131.865		ENSG00000116704(SLC35D1)	4.73524	5.21534	6.55401	2.13011		ENSG00000105866(SP4)	4.66291	2.32978
ENSG00000084628(NKAIN1)	12.0046	4.374		ENSG00000116711(PLA2G4A)	0.0312285	0.0194657	58.9691	96.4702		ENSG00000105875(WDR91)	2.88255	1.94261
ENSG00000084636(COL16A1)	0.399416	0.775073		ENSG00000116717(GADD45A)	21.6714	206.439	14.066	65.2766		ENSG00000105877(DNAH11)	0.0220797	0.026312
ENSG00000084652(TXLNA)	15.1967	15.7128		ENSG00000116729(WLS)	30.309	12.381	11.0516	12.6361		ENSG00000105887(MTPN)	66.2665	21.1851
ENSG00000084676(NCOA1)	10.066	9.74494		ENSG00000116741(RGS2)	11.6945	67.8305	23.9526	45.8677		ENSG00000105926(MPP6)	13.9383	6.80716
ENSG00000084693(AGBL5)	13.1822	12.1467		ENSG00000116771(AGMAT)	0.208676	0.24108	5.80169	0.746401		ENSG00000105929(ATP6V0A4)	0.549018	1.04871
ENSG00000084710(EFR3B)	7.38645	9.04324		ENSG00000116774(OLFML3)	2.48551	11.7753	0.282793	0		ENSG00000105939(ZC3HAV1)	87.5936	299.138
ENSG00000084731(KIF3C)	4.57999	4.7273		ENSG00000116791(CRYZ)	23.8098	3.96983	86.2851	18.8341		ENSG00000105963(ADAP1)	2.65802	13.6907
ENSG00000084733(RAB10)	82.7157	83.7323		ENSG00000116830(TTF2)	18.32	10.1608	9.1941	2.11916		ENSG00000105967(TFEC)	0	0.102693
ENSG00000084754(HADHA)	80.0166	105.086		ENSG00000116833(NR5A2)	0	0	9.28243	15.9018		ENSG00000105968(H2AFV)	155.267	220.369
ENSG00000084764(MAPRE3)	8.39317	10.74		ENSG00000116852(KIF21B)	3.9256	20.2355	2.63236	10.2365		ENSG00000105971(CAV2)	24.737	6.20728
ENSG00000084774(CAD)	25.9955	15.969		ENSG00000116885(OSCP1)	2.00801	1.55634	2.48303	3.00045		ENSG00000105974(CAV1)	41.3452	20.5889
ENSG00000085063(CD59)	181.606	157.66		ENSG00000116906(GNPAT)	24.408	7.38965	27.4346	9.84423		ENSG00000105976(MET)	62.5686	10.3923
ENSG00000085117(CD82)	1.22828	0.990304		ENSG00000116918(TSNAX)	27.6184	8.95051	40.6753	24.2355		ENSG00000105983(LMBR1)	42.1209	13.7404
ENSG00000085185(BCORL1)	2.69769	1.79938		ENSG00000116983(HPCAL4)	0	0.013582	0	0.0162715		ENSG00000106003(LFNG)	1.86203	0.655297
ENSG00000085224(ATRX)	24.6272	22.7193		ENSG00000116991(SIPA1L2)	3.99678	22.1034	3.98388	6.28024		ENSG00000106009(BRAT1)	19.6232	65.4075
ENSG00000085231(AK6)	73.6522	82.3846		ENSG00000117016(RIMS3)	8.60852	7.1702	0.286801	1.20454		ENSG00000106031(HOXA13)	7.98386	1.66719
ENSG00000085274(MYNN)	11.0761	12.1521		ENSG00000117054(ACADM)	33.803	5.53862	25.4523	3.18555		ENSG00000106034(CPED1)	8.16556	3.95466
ENSG00000085276(MECOM)	1.74022	1.76434		ENSG00000117069(ST6GALNAC5)	13.5924	7.25998	0.00620536	0		ENSG00000106069(CHN2)	1.43972	1.9275
ENSG00000085365(SCAMP1)	29.6213	25.7567		ENSG00000117139(KDM5B)	28.2628	13.1082	5.43715	22.9031		ENSG00000106070(GRB10)	61.4617	132.384
ENSG00000085377(PREP)	19.9487	22.2294		ENSG00000117148(ACTL8)	0.0363867	1.30988	0.49315	0		ENSG00000106077(ABHD11)	6.53435	34.5682
ENSG00000085382(HACE1)	2.97897	2.7933		ENSG00000117151(CTBS)	5.24516	1.13061	4.04608	3.21746		ENSG00000106080(FKBP14)	20.8652	15.7024
ENSG00000085415(SEH1L)	27.7855	20.5839		ENSG00000117155(SSX2IP)	19.9141	25.5679	8.84045	3.08698		ENSG00000106086(PLEKHA8)	9.20133	6.30492
ENSG00000085433(WDR47)	7.81232	7.27796		ENSG00000117228(GBP1)	2.67502	4.04961	5.01815	12.9428		ENSG00000106100(NOD1)	4.85367	7.26917
ENSG00000085449(WDFY1)	15.4353	11.0435		ENSG00000117266(CDK18)	8.15446	6.59032	0.256807	4.54328		ENSG00000106105(GARS)	136.408	298.655
ENSG00000085465(OVGP1)	0.29852	0.579878		ENSG00000117280(RAB29)	17.6668	7.72217	4.85804	9.24666		ENSG00000106123(EPHB6)	0.0347182	0.044698
ENSG00000085491(SLC25A24)	63.6955	56.4298		ENSG00000117281(CD160)	1.11819	0.775826	0.194041	0.219627		ENSG00000106153(CHCHD2)	537.647	837.261
ENSG00000085511(MAP3K4)	5.34408	4.95778		ENSG00000117305(HMGCL)	17.0364	13.1693	10.4552	45.0341		ENSG00000106178(CCL24)	0	0
ENSG00000085514(PILRA)	32.9438	34.1325		ENSG00000117318(ID3)	26.0498	16.6535	115.397	120.334		ENSG00000106211(HSPB1)	404.857	763.342
ENSG00000085552(IGSF9)	5.05225	4.95381		ENSG00000117335(CD46)	122.865	29.243	189.181	123.511		ENSG00000106258(CYP3A5)	0.0611116	0.289106
ENSG00000085644(ZNF213)	7.82709	6.74537		ENSG00000117399(CDC20)	93.8366	42.0204	91.0649	8.03326		ENSG00000106261(ZKSCAN1)	8.64707	8.43275
ENSG00000085719(CPNE3)	84.4981	42.9545		ENSG00000117525(F3)	31.0888	86.4957	3.07519	32.9007		ENSG00000106263(EIF3B)	82.3916	63.8285
ENSG00000085721(RRN3)	32.7611	26.7046		ENSG00000117528(ABCD3)	94.9199	27.7314	36.7158	14.1507		ENSG00000106266(SNX8)	29.223	69.2357
ENSG00000085733(CTTN)	145.079	178.369		ENSG00000117533(VAMP4)	6.5157	1.22889	3.25986	3.23313		ENSG00000106268(NUDT1)	27.1134	55.384
ENSG00000085741(WNT11)	0.228681	1.08855		ENSG00000117593(DARS2)	17.7799	7.98487	31.6709	11.18		ENSG00000106299(WASL)	19.0694	7.27479
ENSG00000085760(MTIF2)	23.3732	26.315		ENSG00000117594(HSD11B1)	0	0	0.443774	3.46227		ENSG00000106304(SPAM1)	0	0
ENSG00000085788(DDHD2)	9.03163	9.33529		ENSG00000117632(STMN1)	456.876	805.032	130.312	60.0899		ENSG00000106330(MOSPD3)	7.15972	7.98207
ENSG00000085831(TTC39A)	47.519	40.2014		ENSG00000117643(MAN1C1)	1.64355	4.39065	0.203482	0.425416		ENSG00000106348(IMPDH1)	21.5869	55.2137
ENSG00000085832(EPS15)	15.7946	14.9043		ENSG00000117650(NEK2)	23.666	4.10123	27.7908	1.28531		ENSG00000106351(AGFG2)	14.0557	9.07877
ENSG00000085840(ORC1)	7.7183	8.24501		ENSG00000117697(NSL1)	14.7829	6.99236	19.9239	14.032		ENSG00000106355(LSM5)	33.0929	14.2917
ENSG00000085871(MGST2)	14.7003	30.4157		ENSG00000117707(PROX1)	0	0	0.0226154	0.425096		ENSG00000106366(SERPINE1)	16.1249	13.8697
ENSG00000085872(CHERP)	22.5949	18.9371		ENSG00000117713(ARID1A)	17.2306	18.9293	14.5249	6.21785		ENSG00000106399(RPA3)	25.391	13.1329
ENSG00000085978(ATG16L1)	13.3612	16.1193		ENSG00000117724(CENPF)	29.1998	23.4096	32.7101	2.74816		ENSG00000106404(CLDN15)	3.65513	6.42287
ENSG00000085982(USP40)	8.11906	5.41106		ENSG00000117748(RPA2)	28.2981	24.1042	28.1942	9.83739		ENSG00000106460(TMEM106B)	24.8484	7.54905
ENSG00000085998(POMGNT1)	16.5006	17.2532		ENSG00000117859(OSBPL9)	70.3218	34.0832	22.7516	17.5295		ENSG00000106462(EZH2)	30.1131	40.4191
ENSG00000085999(RAD54L)	11.5201	5.04395		ENSG00000117906(RCN2)	65.4948	25.3902	136.093	35.0702		ENSG00000106484(MEST)	6.95313	4.22046
ENSG00000086015(MAST2)	13.737	13.5181		ENSG00000117983(MUC5B)	4.32124	1.86758	128.594	226.501		ENSG00000106524(ANKMY2)	17.0427	5.00355
ENSG00000086061(DNAJA1)	142.745	158.724		ENSG00000118007(STAG1)	17.6803	18.942	10.9575	3.68571		ENSG00000106537(TSPAN13)	32.6301	6.90014
ENSG00000086062(B4GALT1)	68.0181	44.4348		ENSG00000118096(IFT46)	17.5009	5.05201	8.41482	3.41872		ENSG00000106538(RARRES2)	0.638068	0.527807
ENSG00000086065(CHMP5)	41.5006	26.2402		ENSG00000118137(APOA1)	0.0689008	0.224188	0	0		ENSG00000106541(AGR2)	0.171193	0
ENSG00000086102(NFX1)	14.3807	16.863		ENSG00000118193(KIF14)	8.0161	5.13199	13.3383	1.45164		ENSG00000106546(AHR)	24.3933	8.0271
ENSG00000086189(DIMT1)	22.4221	21.0806		ENSG00000118194(TNNT2)	32.0855	97.2031	0.166065	0.964828		ENSG00000106554(CHCHD3)	47.1829	73.2162
ENSG00000086200(IPO11)	12.9912	8.4485		ENSG00000118200(CAMSAP2)	14.1574	13.2755	16.6712	9.61555		ENSG00000106560(GIMAP2)	0.289114	0
ENSG00000086232(EIF2AK1)	59.8751	54.1278		ENSG00000118263(KLF7)	6.86802	12.1493	3.0692	16.0554		ENSG00000106565(TMEM176B)	0	0
ENSG00000086288(NME8)	0.829302	2.3428		ENSG00000118276(B4GALT6)	1.1454	0.430049	5.83014	3.0568		ENSG00000106571(GLI3)	4.09547	3.14093
ENSG00000086300(SNX10)	11.9607	9.97825		ENSG00000118292(C1orf54)	1.06311	4.47951	0.27667	0.211329		ENSG00000106628(POLD2)	130.393	78.0712
ENSG00000086475(SEPHS1)	51.9401	50.7867		ENSG00000118322(ATP10B)	0.349052	0.0376948	0	0.0641298		ENSG00000106635(BCL7B)	24.0297	30.1501
ENSG00000086504(MRPL28)	67.6149	86.473		ENSG00000118369(USP35)	4.27774	4.43185	1.84249	5.01941		ENSG00000106665(CLIP2)	3.36398	8.32554
ENSG00000086544(ITPKC)	8.88069	11.0948		ENSG00000118402(ELOVL4)	4.51491	4.28387	0.265946	0.498088		ENSG00000106688(SLC1A1)	12.1498	4.70242
ENSG00000086548(CEACAM6)	8.03321	16.2595		ENSG00000118432(CNR1)	0	0	0.315856	1.84286		ENSG00000106689(LHX2)	1.64365	4.98216
ENSG00000086589(RBM22)	25.4499	23.5709		ENSG00000118503(TNFAIP3)	2.51789	2.62764	15.2161	58.6014		ENSG00000106692(FKTN)	5.19046	2.85848
ENSG00000086598(TMED2)	178.275	171.106		ENSG00000118507(AKAP7)	5.15392	2.34845	4.67006	0.874806		ENSG00000106723(SPIN1)	42.6725	12.3185
ENSG00000086619(ERO1B)	0.565221	0.592666		ENSG00000118513(MYB)	11.4348	27.7326	0.187809	2.06231		ENSG00000106733(NMRK1)	6.59988	1.14438
ENSG00000086666(ZFAND6)	71.2878	90.8958		ENSG00000118515(SGK1)	8.46414	50.4253	25.1529	89.5316		ENSG00000106771(TMEM245)	55.5725	14.0852
ENSG00000086712(TXLNG)	11.0345	9.94765		ENSG00000118523(CTGF)	2.30822	0.545837	5.57413	1.18446		ENSG00000106772(PRUNE2)	0	0
ENSG00000086730(LAT2)	0.296871	0.418571		ENSG00000118600(TMEM5)	7.42872	2.53856	21.0767	5.48888		ENSG00000106780(MEGF9)	4.64661	1.96576
ENSG00000086758(HUWE1)	46.8918	45.8519		ENSG00000118762(PKD2)	3.61799	1.94588	17.2565	5.48417		ENSG00000106799(TGFBR1)	93.7076	15.1038
ENSG00000086827(ZW10)	8.53473	7.75267		ENSG00000118849(RARRES1)	387.073	16.1718	11.7929	18.1045		ENSG00000106803(SEC61B)	112.528	57.9739
ENSG00000086848(ALG9)	9.8516	9.45386		ENSG00000118855(MFSD1)	26.3573	8.8749	32.9715	13.7366		ENSG00000106829(TLE4)	8.60434	7.26829
ENSG00000087008(ACOX3)	7.3849	9.75155		ENSG00000118898(PPL)	0	0	3.73808	2.06763		ENSG00000106853(PTGR1)	44.2023	33.1307
ENSG00000087053(MTMR2)	9.20995	6.70962		ENSG00000118960(HS1BP3)	12.7077	26.6339	8.54112	11.1518		ENSG00000106868(SUSD1)	1.49885	1.40351
ENSG00000087074(PPP1R15A)	4.36789	4.872		ENSG00000118961(LDAH)	11.2321	2.41762	7.96387	5.09939		ENSG00000106927(AMBP)	0.0396316	0
ENSG00000087077(TRIP6)	56.2585	70.6838		ENSG00000118965(WDR35)	4.46365	2.2094	4.95307	2.88096		ENSG00000106948(AKNA)	1.14312	0.589649
ENSG00000087085(ACHE)	1.39175	1.4375		ENSG00000118971(CCND2)	0	0	0.0231932	0.302257		ENSG00000106976(DNM1)	0.339008	0.760732
ENSG00000087086(FTL)	346.218	426.394		ENSG00000118985(ELL2)	13.8196	16.4293	13.092	34.2236		ENSG00000107014(RLN2)	0	0
ENSG00000087087(SRRT)	50.7603	47.8694		ENSG00000119125(GDA)	0.327448	0.28222	5.48135	15.111		ENSG00000107020(PLGRKT)	28.2446	13.5623
ENSG00000087088(BAX)	89.4116	184.407		ENSG00000119138(KLF9)	2.07694	1.26578	0.446921	5.98483		ENSG00000107099(DOCK8)	0.0832052	0
ENSG00000087095(NLK)	9.27879	7.88316		ENSG00000119280(C1orf198)	25.8907	16.1382	12.5315	6.84291		ENSG00000107105(ELAVL2)	0.0360981	0
ENSG00000087111(PIGS)	34.3379	22.7604		ENSG00000119283(TRIM67)	0.0163113	0.46994	0.169518	0.176836		ENSG00000107159(CA9)	68.7032	7.30814
ENSG00000087128(TMPRSS11E)	0.145116	0.99251		ENSG00000119314(PTBP3)	60.3246	22.6037	48.7451	52.2488		ENSG00000107164(FUBP3)	31.4738	13.4193
ENSG00000087152(ATXN7L3)	24.6361	18.884		ENSG00000119326(CTNNAL1)	0.911554	0.62319	39.4323	11.4811		ENSG00000107187(LHX3)	0.021972	0.409732
ENSG00000087157(PGS1)	18.1995	14.1452		ENSG00000119396(RAB14)	31.4387	17.4374	43.7019	24.7875		ENSG00000107201(DDX58)	84.6761	83.5149
ENSG00000087191(PSMC5)	285.177	394.822		ENSG00000119403(PHF19)	12.182	25.4025	60.5576	16.8352		ENSG00000107362(ABHD17B)	57.6108	27.7212
ENSG00000087206(UIMC1)	13.447	13.0636		ENSG00000119408(NEK6)	10.5643	6.12908	14.9416	22.6789		ENSG00000107404(DVL1)	51.4311	50.7394
ENSG00000087253(LPCAT2)	2.38273	1.78257		ENSG00000119446(RBM18)	7.14503	3.72759	8.06529	6.5229		ENSG00000107438(PDLIM1)	39.6859	64.3322
ENSG00000087258(GNAO1)	0.156875	0.313225		ENSG00000119535(CSF3R)	16.7838	1.13413	0	0		ENSG00000107485(GATA3)	0.10527	0.0908759
ENSG00000087263(OGFOD1)	12.4969	12.8259		ENSG00000119559(C19orf25)	13.0081	41.799	14.088	13.8238		ENSG00000107518(ATRNL1)	0.0130007	0
ENSG00000087266(SH3BP2)	11.4857	13.018		ENSG00000119599(DCAF4)	21.9784	10.5384	4.10833	3.50628		ENSG00000107521(HPS1)	10.9225	24.6945
ENSG00000087269(NOP14)	17.6009	20.4039		ENSG00000119616(FCF1)	27.0958	5.78683	34.234	14.1887		ENSG00000107551(RASSF4)	0	0
ENSG00000087274(ADD1)	24.4569	23.8917		ENSG00000119630(PGF)	0.0371202	0.61718	0.364099	4.11565		ENSG00000107560(RAB11FIP2)	7.87024	3.27853
ENSG00000087299(L2HGDH)	29.9295	29.6835		ENSG00000119640(ACYP1)	10.351	13.0143	17.747	31.8931		ENSG00000107581(EIF3A)	56.3931	29.5597
ENSG00000087301(TXNDC16)	6.42802	5.21046		ENSG00000119661(DNAL1)	5.32554	3.35411	4.96944	4.20492		ENSG00000107614(TRDMT1)	2.84653	1.48815
ENSG00000087302(C14orf166)	86.704	123.866		ENSG00000119669(IRF2BPL)	10.2864	4.91282	19.0836	16.4379		ENSG00000107651(SEC23IP)	13.0223	12.6463
ENSG00000087365(SF3B2)	132.632	120.411		ENSG00000119699(TGFB3)	1.10661	1.49511	0.317264	0.369623		ENSG00000107669(ATE1)	16.1479	8.00675
ENSG00000087448(KLHL42)	10.5915	10.5883		ENSG00000119711(ALDH6A1)	4.01267	0.534103	3.75089	0.866235		ENSG00000107731(UNC5B)	0.141809	0.05746
ENSG00000087460(GNAS)	1366.02	1434.63		ENSG00000119866(BCL11A)	1.86992	2.7173	0.59295	1.68715		ENSG00000107736(CDH23)	0.003347	0.11051
ENSG00000087470(DNM1L)	20.6625	17.2374		ENSG00000119906(SLF2)	8.9064	9.96511	9.46522	3.66577		ENSG00000107738(VSIR)	4.79906	4.41309
ENSG00000087502(ERGIC2)	26.8002	26.671		ENSG00000119912(IDE)	17.2714	5.86224	28.2919	8.60257		ENSG00000107742(SPOCK2)	0.511759	0.914693
ENSG00000087510(TFAP2C)	72.5913	51.3297		ENSG00000119915(ELOVL3)	0.380026	0.762286	2.16821	12.6637		ENSG00000107789(MINPP1)	21.1833	6.48311
ENSG00000087586(AURKA)	119.474	96.5321		ENSG00000119917(IFIT3)	3.10906	3.02525	69.0643	213.408		ENSG00000107796(ACTA2)	4.27291	6.40582
ENSG00000087842(PIR)	12.8017	21.9678		ENSG00000119922(IFIT2)	1.97299	1.20207	80.3451	143.888		ENSG00000107798(LIPA)	48.8065	9.93329
ENSG00000087884(AAMDC)	14.724	12.6446		ENSG00000119927(GPAM)	3.61835	1.84484	4.52447	3.32619		ENSG00000107821(KAZALD1)	9.19552	12.1707
ENSG00000087903(RFX2)	2.12618	1.47596		ENSG00000119938(PPP1R3C)	26.4712	2.81597	16.0888	43.7286		ENSG00000107863(ARHGAP21)	19.7195	11.1037
ENSG00000087995(METTL2A)	28.5045	24.5667		ENSG00000119943(PYROXD2)	3.07762	0.201226	4.35333	5.51703		ENSG00000107864(CPEB3)	3.94367	4.34161
ENSG00000088002(SULT2B1)	42.5403	53.523		ENSG00000119950(MXI1)	16.6607	6.40944	1.91696	12.5651		ENSG00000107882(SUFU)	5.63649	7.49552
ENSG00000088035(ALG6)	16.1176	10.9821		ENSG00000119977(TCTN3)	14.4012	2.77526	35.6718	6.33606		ENSG00000107897(ACBD5)	20.8193	6.55407
ENSG00000088038(CNOT3)	23.6561	20.3573		ENSG00000119979(FAM45A)	30.3772	8.45945	18.9007	14.0474		ENSG00000107902(LHPP)	10.3686	10.3433
ENSG00000088179(PTPN4)	6.50406	6.49766		ENSG00000119986(AVPI1)	3.23101	11.1629	84.047	158.598		ENSG00000107954(NEURL1)	10.4601	17.6815
ENSG00000088205(DDX18)	38.5641	25.0926		ENSG00000120068(HOXB8)	0	0.472894	8.15763	25.1006		ENSG00000107957(SH3PXD2A)	13.972	10.5607
ENSG00000088247(KHSRP)	71.6629	89.1496		ENSG00000120137(PANK3)	66.1009	65.3478	20.2159	17.9006		ENSG00000107984(DKK1)	14.4834	3.72902
ENSG00000088256(GNA11)	18.3487	12.8538		ENSG00000120149(MSX2)	0	0.119392	10.7933	26.0388		ENSG00000108064(TFAM)	25.0908	17.0317
ENSG00000088280(ASAP3)	4.219	4.66595		ENSG00000120162(MOB3B)	1.21002	1.52619	0.594348	1.46862		ENSG00000108091(CCDC6)	17.6005	7.71885
ENSG00000088298(EDEM2)	9.37766	7.91535		ENSG00000120217(CD274)	0.122336	0.250956	1.56191	12.1867		ENSG00000108106(UBE2S)	83.9914	108.215
ENSG00000088305(DNMT3B)	12.3496	6.80389		ENSG00000120278(PLEKHG1)	0.697321	1.50001	0.130436	0.638444		ENSG00000108176(DNAJC12)	14.974	8.10269
ENSG00000088325(TPX2)	66.196	44.9108		ENSG00000120318(ARAP3)	0.543012	0.799237	1.94394	2.14389		ENSG00000108179(PPIF)	50.0407	125.238
ENSG00000088356(PDRG1)	24.0419	30.0148		ENSG00000120341(SEC16B)	0.352557	0.0572296	1.16671	6.23167		ENSG00000108262(GIT1)	16.343	54.2333
ENSG00000088367(EPB41L1)	10.8043	17.0511		ENSG00000120539(MASTL)	11.6959	14.5449	15.3486	9.0217		ENSG00000108306(FBXL20)	6.86191	3.96824
ENSG00000088387(DOCK9)	4.46407	4.45118		ENSG00000120594(PLXDC2)	0.219557	0.0923469	0	0.101655		ENSG00000108342(CSF3)	0.039191	0.049716
ENSG00000088448(ANKRD10)	15.774	14.2795		ENSG00000120647(CCDC77)	4.27328	6.18675	6.64249	5.78553		ENSG00000108352(RAPGEFL1)	1.72657	4.16126
ENSG00000088451(TGDS)	5.63384	4.81581		ENSG00000120693(SMAD9)	0.20278	0.413755	0.0911208	0.213048		ENSG00000108370(RGS9)	5.8929	6.69147
ENSG00000088682(COQ9)	14.5309	19.6323		ENSG00000120694(HSPH1)	57.1302	29.6824	68.2833	23.0569		ENSG00000108379(WNT3)	3.85217	3.27625
ENSG00000088727(KIF9)	4.0032	4.1395		ENSG00000120705(ETF1)	100.071	19.2216	77.7534	23.1014		ENSG00000108381(ASPA)	0	0
ENSG00000088766(CRLS1)	35.2256	24.9448		ENSG00000120708(TGFBI)	24.14	6.11108	262.21	215.488		ENSG00000108384(RAD51C)	29.7715	36.6447
ENSG00000088808(PPP1R13B)	15.8731	16.9744		ENSG00000120738(EGR1)	12.2721	1.3883	1.01269	1.05971		ENSG00000108387(SEPT4)	0.343876	0.602478
ENSG00000088812(ATRN)	12.9869	10.5274		ENSG00000120756(PLS1)	23.3775	8.43881	33.856	28.4763		ENSG00000108389(MTMR4)	12.0439	6.25079
ENSG00000088826(SMOX)	5.56009	4.58852		ENSG00000120800(UTP20)	3.46836	4.07645	11.3321	2.33753		ENSG00000108405(P2RX1)	0	0.0293777
ENSG00000088832(FKBP1A)	145.098	142.097		ENSG00000120802(TMPO)	61.1295	35.6368	117.346	32.9193		ENSG00000108406(DHX40)	18.1971	7.99773
ENSG00000088833(NSFL1C)	28.5883	32.7131		ENSG00000120820(GLT8D2)	4.19536	0.435978	0.0458915	0.0392763		ENSG00000108417(KRT37)	0.0287192	0
ENSG00000088836(SLC4A11)	1.58311	1.61085		ENSG00000120837(NFYB)	86.4884	14.2015	19.4431	8.50358		ENSG00000108439(PNPO)	11.4004	10.198
ENSG00000088854(C20orf194)	2.9161	3.01169		ENSG00000120875(DUSP4)	15.6561	16.2427	94.4153	144.319		ENSG00000108448(TRIM16L)	25.144	28.7787
ENSG00000088876(ZNF343)	2.63897	2.44991		ENSG00000120913(PDLIM2)	24.2089	20.9742	27.7366	55.1895		ENSG00000108506(INTS2)	22.1136	12.6403
ENSG00000088881(EBF4)	1.02113	0.673566		ENSG00000120915(EPHX2)	4.02865	0.520708	8.46901	3.91573		ENSG00000108515(ENO3)	56.4341	54.8373
ENSG00000088888(MAVS)	30.1379	28.9882		ENSG00000120992(LYPLA1)	47.9584	14.4731	71.1128	22.4071		ENSG00000108551(RASD1)	0.932399	1.17064
ENSG00000088899(LZTS3)	1.1837	0.788695		ENSG00000121039(RDH10)	26.9883	6.16012	44.2314	45.3793		ENSG00000108582(CPD)	17.4484	6.39932
ENSG00000088930(XRN2)	46.6189	28.464		ENSG00000121064(SCPEP1)	46.0994	12.1236	21.4495	14.2178		ENSG00000108587(GOSR1)	17.1309	14.2344
ENSG00000088970(KIZ)	2.18753	0.967214		ENSG00000121075(TBX4)	0	0	0.082637	1.00858		ENSG00000108588(CCDC47)	46.6933	19.8331
ENSG00000088986(DYNLL1)	219.645	243.502		ENSG00000121104(FAM117A)	3.55523	0.565435	0.233532	0.472415		ENSG00000108590(MED31)	13.1839	41.4841
ENSG00000088992(TESC)	1.2638	1.86322		ENSG00000121152(NCAPH)	24.7832	24.6938	19.6916	1.7735		ENSG00000108602(ALDH3A1)	2.1281	4.3206
ENSG00000089006(SNX5)	101.12	98.9649		ENSG00000121207(LRAT)	0.401047	0.5731	0.0161975	0.0874933		ENSG00000108622(ICAM2)	0.0528025	0
ENSG00000089009(RPL6)	1140.54	1471.06		ENSG00000121211(MND1)	5.97398	11.6469	13.376	4.14174		ENSG00000108669(CYTH1)	37.5977	23.287
ENSG00000089022(MAPKAPK5)	28.9988	24.1539		ENSG00000121236(TRIM6)	6.91817	2.18133	9.00174	11.6191		ENSG00000108671(PSMD11)	43.8298	37.5102
ENSG00000089048(ESF1)	17.5475	17.641		ENSG00000121270(ABCC11)	0.14895	0.105495	0.014269	0.0147177		ENSG00000108679(LGALS3BP)	247.636	184.803
ENSG00000089050(RBBP9)	10.0706	9.77051		ENSG00000121274(PAPD5)	12.1766	7.94834	10.1862	9.61867		ENSG00000108684(ASIC2)	0	0
ENSG00000089053(ANAPC5)	85.1834	68.707		ENSG00000121316(PLBD1)	3.24998	12.5771	0.667884	2.02434		ENSG00000108733(PEX12)	3.9463	1.669
ENSG00000089057(SLC23A2)	5.02775	3.53922		ENSG00000121454(LHX4)	3.33541	9.86107	2.56738	2.14431		ENSG00000108759(KRT32)	0	0
ENSG00000089060(SLC8B1)	4.03598	4.16881		ENSG00000121481(RNF2)	7.31703	3.40041	3.66701	2.04568		ENSG00000108771(DHX58)	4.97967	6.37691
ENSG00000089063(TMEM230)	40.1492	25.0675		ENSG00000121486(TRMT1L)	8.49106	2.78558	8.55886	7.04058		ENSG00000108797(CNTNAP1)	5.79039	22.4903
ENSG00000089091(DZANK1)	1.39078	0.740565		ENSG00000121552(CSTA)	0.808013	2.82739	0.44273	29.1277		ENSG00000108821(COL1A1)	10.3903	16.825
ENSG00000089094(KDM2B)	14.5454	12.6686		ENSG00000121579(NAA50)	118.722	61.2065	113.649	49.7843		ENSG00000108828(VAT1)	82.5738	192.987
ENSG00000089123(TASP1)	11.9321	7.33908		ENSG00000121691(CAT)	127.012	13.2437	23.5392	5.50001		ENSG00000108829(LRRC59)	92.37	45.8158
ENSG00000089127(OAS1)	17.4494	3.79479		ENSG00000121741(ZMYM2)	19.2965	5.52676	8.27176	6.95283		ENSG00000108840(HDAC5)	7.78502	8.29724
ENSG00000089154(GCN1)	37.9222	33.8206		ENSG00000121753(ADGRB2)	0.90641	5.1842	4.9537	10.9915		ENSG00000108846(ABCC3)	34.0031	29.8309
ENSG00000089157(RPLP0)	1890.89	2312		ENSG00000121769(FABP3)	0	0	0.130888	0		ENSG00000108852(MPP2)	2.27334	3.40819
ENSG00000089159(PXN)	73.6873	70.8056		ENSG00000121851(POLR3GL)	6.96093	0.298447	5.77493	2.43018		ENSG00000108861(DUSP3)	26.4757	21.8412
ENSG00000089177(KIF16B)	5.54863	7.5923		ENSG00000121858(TNFSF10)	34.2915	7.20924	3.56952	24.0326		ENSG00000108932(SLC16A6)	46.0559	14.6486
ENSG00000089195(TRMT6)	11.5107	15.1023		ENSG00000121892(PDS5A)	29.7417	10.9662	27.6478	10.8411		ENSG00000108946(PRKAR1A)	77.3626	27.5495
ENSG00000089220(PEBP1)	184.362	206.539		ENSG00000121895(TMEM156)	4.81804	14.0917	8.07631	18.4589		ENSG00000108947(EFNB3)	0.0160347	0.133979
ENSG00000089234(BRAP)	11.5929	9.68314		ENSG00000121900(TMEM54)	53.5597	88.6965	12.0147	41.4889		ENSG00000108960(MMD)	10.0866	5.71655
ENSG00000089248(ERP29)	90.1979	122.02		ENSG00000121966(CXCR4)	0.577275	1.50455	0.334647	8.98565		ENSG00000108984(MAP2K6)	26.0548	4.73593
ENSG00000089280(FUS)	205.949	191.416		ENSG00000122033(MTIF3)	34.7781	22.4393	17.3837	13.5043		ENSG00000109089(CDR2L)	14.9261	53.4194
ENSG00000089289(IGBP1)	24.1899	26.2747		ENSG00000122034(GTF3A)	61.4474	70.0528	70.4839	19.6644		ENSG00000109099(PMP22)	56.8044	154.537
ENSG00000089327(FXYD5)	1.29994	2.92139		ENSG00000122035(RASL11A)	4.81434	0.25543	1.18618	1.75021		ENSG00000109101(FOXN1)	0.69491	0.171609
ENSG00000089335(ZNF302)	6.66965	6.13796		ENSG00000122042(UBL3)	14.667	4.85887	6.79658	4.82228		ENSG00000109107(ALDOC)	20.4984	27.0934
ENSG00000089351(GRAMD1A)	27.9017	34.2537		ENSG00000122068(FYTTD1)	25.4095	1.80051	15.8587	4.84694		ENSG00000109111(SUPT6H)	22.8576	70.878
ENSG00000089356(FXYD3)	112.711	145.301		ENSG00000122188(LAX1)	0	0.0524525	0	0.0643617		ENSG00000109113(RAB34)	67.9778	88.2477
ENSG00000089486(CDIP1)	0.540051	0.970278		ENSG00000122203(KIAA1191)	92.9807	23.8261	37.0667	18.2743		ENSG00000109189(USP46)	2.05509	1.38882
ENSG00000089505(CMTM1)	30.1901	40.6099		ENSG00000122218(COPA)	67.6795	13.5185	52.9537	31.437		ENSG00000109320(NFKB1)	18.7217	11.6092
ENSG00000089597(GANAB)	153.981	165.165		ENSG00000122376(FAM35A)	34.3058	8.20153	34.4009	15.1792		ENSG00000109321(AREG)	11.808	14.1962
ENSG00000089682(RBM41)	5.04244	4.40759		ENSG00000122481(RWDD3)	32.5171	21.0363	25.9694	8.09746		ENSG00000109436(TBC1D9)	10.1446	3.66569
ENSG00000089685(BIRC5)	55.6923	34.1199		ENSG00000122483(CCDC18)	5.98813	5.24423	7.02315	1.63238		ENSG00000109452(INPP4B)	1.0919	0.905226
ENSG00000089693(MLF2)	100.256	151.038		ENSG00000122507(BBS9)	6.93707	1.89947	2.2013	2.80713		ENSG00000109472(CPE)	11.383	2.83176
ENSG00000089723(OTUB2)	2.39369	1.55189		ENSG00000122547(EEPD1)	2.01914	5.87294	1.62086	3.95412		ENSG00000109501(WFS1)	6.3899	7.43253
ENSG00000089737(DDX24)	82.0513	99.145		ENSG00000122565(CBX3)	258.261	177.161	237.094	74.6858		ENSG00000109511(ANXA10)	0.792175	0
ENSG00000089775(ZBTB25)	7.21444	9.67413		ENSG00000122566(HNRNPA2B1)	601.537	719.36	626.013	156.928		ENSG00000109534(GAR1)	24.9103	7.11749
ENSG00000089818(NECAP1)	21.1899	18.089		ENSG00000122574(WIPF3)	0.271898	0.227111	0.171968	1.29718		ENSG00000109572(CLCN3)	18.3576	6.68931
ENSG00000089820(ARHGAP4)	4.10833	3.71627		ENSG00000122641(INHBA)	0.313655	0.665411	0	2.18772		ENSG00000109586(GALNT7)	24.1412	3.41553
ENSG00000089847(ANKRD24)	0.413594	0.267942		ENSG00000122691(TWIST1)	0	0	2.46814	9.0767		ENSG00000109606(DHX15)	62.033	27.7431
ENSG00000089876(DHX32)	13.2009	11.6099		ENSG00000122705(CLTA)	93.0555	29.937	191.693	58.0484		ENSG00000109618(SEPSECS)	6.12051	1.60268
ENSG00000089902(RCOR1)	41.9621	25.2381		ENSG00000122756(CNTFR)	0	1.28794	0	0.290275		ENSG00000109654(TRIM2)	5.46555	1.53118
ENSG00000089916(GPATCH2L)	19.7066	15.0126		ENSG00000122786(CALD1)	39.8996	12.7287	30.214	15.0936		ENSG00000109670(FBXW7)	4.27027	5.87691
ENSG00000090006(LTBP4)	9.48869	9.05489		ENSG00000122787(AKR1D1)	0.185563	0.312244	0	0		ENSG00000109674(NEIL3)	10.7942	9.3257
ENSG00000090013(BLVRB)	119.977	223.266		ENSG00000122870(BICC1)	3.22151	0.822884	38.7208	9.64915		ENSG00000109680(TBC1D19)	5.6526	3.12927
ENSG00000090020(SLC9A1)	26.1017	40.5564		ENSG00000122884(P4HA1)	15.2836	3.53258	18.7605	19.296		ENSG00000109686(SH3D19)	21.1596	18.3033
ENSG00000090054(SPTLC1)	59.2642	52.7024		ENSG00000122952(ZWINT)	53.1772	64.0969	68.1994	5.25166		ENSG00000109738(GLRB)	5.76739	1.1642
ENSG00000090060(PAPOLA)	95.2421	88.505		ENSG00000122958(VPS26A)	65.2492	39.5314	42.1836	19.6727		ENSG00000109756(RAPGEF2)	16.0384	7.67303
ENSG00000090061(CCNK)	41.9105	23.612		ENSG00000122966(CIT)	5.11463	3.21069	12.8518	0.768405		ENSG00000109762(SNX25)	10.2911	4.05257
ENSG00000090097(PCBP4)	21.4398	23.1444		ENSG00000123080(CDKN2C)	18.971	24.8869	49.2445	15.158		ENSG00000109771(LRP2BP)	0.400599	0.830038
ENSG00000090238(YPEL3)	37.163	29.7214		ENSG00000123091(RNF11)	48.9235	12.0924	18.0664	9.9237		ENSG00000109787(KLF3)	21.7477	9.54626
ENSG00000090263(MRPS33)	32.7303	37.6399		ENSG00000123095(BHLHE41)	6.07662	1.58404	0.258855	0.346229		ENSG00000109790(KLHL5)	24.6003	15.1272
ENSG00000090266(NDUFB2)	271.897	315.414		ENSG00000123096(SSPN)	5.21849	0.660892	0.314808	0.831006		ENSG00000109805(NCAPG)	31.1076	17.5226
ENSG00000090273(NUDC)	62.0199	77.5483		ENSG00000123104(ITPR2)	5.63051	1.7807	2.64062	2.73978		ENSG00000109814(UGDH)	18.0641	8.70001
ENSG00000090316(MAEA)	28.0066	29.5445		ENSG00000123136(DDX39A)	55.2061	193.654	99.0309	70.432		ENSG00000109819(PPARGC1A)	5.44555	3.20785
ENSG00000090339(ICAM1)	2.25613	8.83564		ENSG00000123154(WDR83)	6.9239	11.8704	4.11623	9.14522		ENSG00000109846(CRYAB)	1.2208	9.91681
ENSG00000090372(STRN4)	57.2723	60.8657		ENSG00000123191(ATP7B)	2.48469	0.996428	1.08644	1.55162		ENSG00000109881(CCDC34)	13.7433	6.45393
ENSG00000090432(MUL1)	12.8808	14.438		ENSG00000123213(NLN)	16.1736	9.89244	30.0556	10.9173		ENSG00000109927(TECTA)	0.0394833	0
ENSG00000090447(TFAP4)	10.464	8.66786		ENSG00000123219(CENPK)	23.3968	19.9442	42.021	14.2081		ENSG00000110002(VWA5A)	48.2676	37.284
ENSG00000090470(PDCD7)	18.3948	12.4642		ENSG00000123243(ITIH5)	0	0	1.28782	8.05401		ENSG00000110042(DTX4)	2.82275	2.1415
ENSG00000090487(SPG21)	83.1756	81.615		ENSG00000123342(MMP19)	0.089539	0	0	0.375962		ENSG00000110046(ATG2A)	8.57252	12.5353
ENSG00000090520(DNAJB11)	38.4518	52.6598		ENSG00000123352(SPATS2)	15.4873	45.6566	18.7812	35.9706		ENSG00000110047(EHD1)	15.0768	75.8254
ENSG00000090539(CHRD)	0.503975	0.868946		ENSG00000123358(NR4A1)	3.14418	12.7717	26.3969	292.721		ENSG00000110060(PUS3)	11.6104	24.3726
ENSG00000090565(RAB11FIP3)	42.2419	32.5204		ENSG00000123364(HOXC13)	8.40306	11.1982	3.98045	24.2468		ENSG00000110076(NRXN2)	0.122071	0
ENSG00000090581(GNPTG)	9.30004	10.9592		ENSG00000123384(LRP1)	1.85012	1.22379	3.00682	27.0095		ENSG00000110092(CCND1)	51.9417	39.63
ENSG00000090612(ZNF268)	8.01584	7.66101		ENSG00000123388(HOXC11)	6.08485	11.8546	0.386219	0.576322		ENSG00000110104(CCDC86)	26.0622	77.9415
ENSG00000090621(PABPC4)	83.9941	55.0928		ENSG00000123395(ATG101)	28.2863	82.6885	45.9699	159.259		ENSG00000110171(TRIM3)	3.53541	15.7748
ENSG00000090661(CERS4)	18.3235	24.6064		ENSG00000123405(NFE2)	1.40605	1.12546	0.753218	4.42845		ENSG00000110200(ANAPC15)	19.8171	66.7964
ENSG00000090686(USP48)	23.1529	22.9619		ENSG00000123416(TUBA1B)	729.322	1015.93	1111.73	279.504		ENSG00000110203(FOLR3)	0.0709001	2.99462
ENSG00000090776(EFNB1)	3.7739	3.256		ENSG00000123473(STIL)	18.6735	19.7265	9.2331	1.47673		ENSG00000110244(APOA4)	0	0.0441302
ENSG00000090857(PDPR)	14.1991	12.5269		ENSG00000123485(HJURP)	17.3838	16.8403	42.5972	13.2552		ENSG00000110321(EIF4G2)	189.836	94.3
ENSG00000090861(AARS)	92.2169	176.541		ENSG00000123496(IL13RA2)	0.0399532	9.55351	0.186111	0.0671643		ENSG00000110324(IL10RA)	0.0116196	0
ENSG00000090863(GLG1)	38.6969	52.3405		ENSG00000123545(NDUFAF4)	11.4883	31.2855	12.341	22.0647		ENSG00000110328(GALNT18)	0	0
ENSG00000090889(KIF4A)	15.3191	10.5705		ENSG00000123572(NRK)	1.43297	1.3352	0	0		ENSG00000110400(NECTIN1)	2.78166	16.2548
ENSG00000090905(TNRC6A)	13.5821	13.709		ENSG00000123575(FAM199X)	26.0739	16.7246	20.7863	16.0263		ENSG00000110427(KIAA1549L)	0.0368563	0
ENSG00000090924(PLEKHG2)	5.19613	7.96686		ENSG00000123600(METTL8)	7.35965	9.65437	8.82696	1.45085		ENSG00000110436(SLC1A2)	0.0150062	0.374585
ENSG00000090971(NAT14)	12.7402	21.1209		ENSG00000123607(TTC21B)	4.21932	1.64165	3.94215	2.8404		ENSG00000110446(SLC15A3)	13.3124	6.40548
ENSG00000090975(PITPNM2)	3.05887	3.04107		ENSG00000123610(TNFAIP6)	0	0	0.934742	28.4669		ENSG00000110455(ACCS)	2.1183	1.62914
ENSG00000090989(EXOC1)	11.2097	9.27255		ENSG00000123684(LPGAT1)	16.3848	14.2504	38.1063	29.1384		ENSG00000110484(SCGB2A2)	0	0
ENSG00000091009(RBM27)	15.9472	14.8795		ENSG00000123689(G0S2)	0.136591	0	4.06114	23.413		ENSG00000110492(MDK)	0.798386	1.13858
ENSG00000091039(OSBPL8)	32.7625	20.4862		ENSG00000123836(PFKFB2)	10.6476	6.94698	7.92407	6.04036		ENSG00000110628(SLC22A18)	13.6496	14.3491
ENSG00000091073(DTX2)	13.0078	18.188		ENSG00000123843(C4BPB)	0.331427	0	3.94995	3.79974		ENSG00000110693(SOX6)	0.681967	0.288924
ENSG00000091127(PUS7)	17.56	14.5611		ENSG00000123933(MXD4)	8.06038	4.3993	4.48677	8.06739		ENSG00000110697(PITPNM1)	26.2662	43.4808
ENSG00000091129(NRCAM)	42.0215	21.1614		ENSG00000123975(CKS2)	97.5535	48.34	283.549	113.54		ENSG00000110700(RPS13)	649.922	884.788
ENSG00000091136(LAMB1)	5.42979	6.42942		ENSG00000123977(DAW1)	0	0	0.170436	0		ENSG00000110719(TCIRG1)	35.8636	68.862
ENSG00000091140(DLD)	107.773	55.9073		ENSG00000124102(PI3)	518.145	913.447	316.103	557.912		ENSG00000110723(EXPH5)	1.24809	0.519162
ENSG00000091157(WDR7)	3.2468	2.85924		ENSG00000124107(SLPI)	808.948	959.894	546.229	1107.58		ENSG00000110777(POU2AF1)	0.00959095	0
ENSG00000091164(TXNL1)	38.0129	48.6688		ENSG00000124159(MATN4)	0.178871	0.166423	0	0		ENSG00000110811(P3H3)	0.0874431	0.418436
ENSG00000091317(CMTM6)	40.2716	23.5219		ENSG00000124160(NCOA5)	13.8891	17.7226	13.2769	4.10051		ENSG00000110852(CLEC2B)	24.615	19.3593
ENSG00000091409(ITGA6)	1.02276	0.638601		ENSG00000124171(PARD6B)	5.56015	6.31197	5.22751	8.14007		ENSG00000110881(ASIC1)	3.20857	3.47368
ENSG00000091436(MAP3K20)	19.2666	19.733		ENSG00000124191(TOX2)	1.60213	2.67899	3.6979	6.9138		ENSG00000110911(SLC11A2)	44.7998	14.8105
ENSG00000091483(FH)	39.1047	43.8082		ENSG00000124207(CSE1L)	94.3284	25.8279	101.584	16.1047		ENSG00000110917(MLEC)	28.5673	30.0183
ENSG00000091490(SEL1L3)	1.87317	2.41638		ENSG00000124216(SNAI1)	1.51336	1.22079	1.05793	4.3855		ENSG00000110921(MVK)	10.9299	42.1346
ENSG00000091527(CDV3)	107.593	72.269		ENSG00000124225(PMEPA1)	14.1149	16.608	33.579	17.7158		ENSG00000110931(CAMKK2)	10.6399	7.61413
ENSG00000091536(MYO15A)	46.0038	47.8383		ENSG00000124253(PCK1)	0.0313908	0.0121836	0.0155547	3.17902		ENSG00000110944(IL23A)	0.391828	0.582725
ENSG00000091622(PITPNM3)	0.770717	0.244424		ENSG00000124299(PEPD)	60.0442	9.42703	75.0593	12.0596		ENSG00000110958(PTGES3)	257.304	222.251
ENSG00000091640(SPAG7)	41.6737	44.6197		ENSG00000124333(VAMP7)	55.8084	12.9278	27.4907	10.52		ENSG00000111052(LIN7A)	0.161004	0.0217467
ENSG00000091651(ORC6)	11.2213	11.9263		ENSG00000124356(STAMBP)	32.4608	8.72828	11.8005	8.97993		ENSG00000111057(KRT18)	415.992	483.098
ENSG00000091732(ZC3HC1)	8.96787	7.42431		ENSG00000124422(USP22)	45.1003	17.0182	67.9207	22.7072		ENSG00000111058(ACSS3)	0	0
ENSG00000091831(ESR1)	62.9904	48.2091		ENSG00000124466(LYPD3)	22.1898	8.135	1.27319	4.91763		ENSG00000111077(TNS2)	4.32454	4.27288
ENSG00000091844(RGS17)	2.13632	1.82436		ENSG00000124507(PACSIN1)	4.10676	3.42738	0.0558865	0.0424266		ENSG00000111087(GLI1)	0.747056	3.85313
ENSG00000091947(TMEM101)	23.6451	24.8134		ENSG00000124508(BTN2A2)	8.35996	6.05241	2.4475	11.4076		ENSG00000111110(PPM1H)	8.4414	5.82059
ENSG00000092010(PSME1)	197.324	203.946		ENSG00000124532(MRS2)	33.9637	18.4146	15.8645	6.58775		ENSG00000111145(ELK3)	15.7012	2.62488
ENSG00000092020(PPP2R3C)	13.2752	17.1939		ENSG00000124575(HIST1H1D)	0.105347	0	0.344646	1.22265		ENSG00000111206(FOXM1)	61.4151	108.239
ENSG00000092036(HAUS4)	48.1116	38.0228		ENSG00000124596(OARD1)	51.0027	9.83373	16.4789	7.31407		ENSG00000111247(RAD51AP1)	29.6361	24.2708
ENSG00000092051(JPH4)	32.3745	47.5994		ENSG00000124664(SPDEF)	84.335	49.4896	11.2088	16.3138		ENSG00000111252(SH2B3)	2.17686	2.07499
ENSG00000092068(SLC7A8)	1.0126	1.23051		ENSG00000124731(TREM1)	0.0837319	0.917724	0.589459	4.95786		ENSG00000111269(CREBL2)	23.9802	5.71928
ENSG00000092094(OSGEP)	10.2767	14.2716		ENSG00000124743(KLHL31)	5.02921	6.6522	0.133133	0.945577		ENSG00000111276(CDKN1B)	49.3918	29.3295
ENSG00000092096(SLC22A17)	5.67386	5.33729		ENSG00000124762(CDKN1A)	8.72033	50.7977	43.4255	154.623		ENSG00000111319(SCNN1A)	13.2028	4.64854
ENSG00000092098(RNF31)	35.7967	30.1571		ENSG00000124767(GLO1)	169.589	42.2438	64.2479	16.4198		ENSG00000111321(LTBR)	74.9066	201.222
ENSG00000092108(SCFD1)	37.0605	53.843		ENSG00000124783(SSR1)	191.315	34.943	76.028	22.6888		ENSG00000111328(CDK2AP1)	125.312	51.4038
ENSG00000092140(G2E3)	21.2401	15.9869		ENSG00000124785(NRN1)	0	0	2.62693	0.401035		ENSG00000111331(OAS3)	77.6031	126.983
ENSG00000092148(HECTD1)	50.4086	46.8803		ENSG00000124786(SLC35B3)	18.1825	5.97217	6.99596	3.39543		ENSG00000111335(OAS2)	33.8679	10.8437
ENSG00000092199(HNRNPC)	424.809	476.31		ENSG00000124787(RPP40)	21.0405	13.7089	9.02251	3.73525		ENSG00000111341(MGP)	0.0454188	2.79375
ENSG00000092201(SUPT16H)	76.43	82.4997		ENSG00000124788(ATXN1)	11.447	15.6695	2.10417	4.62762		ENSG00000111344(RASAL1)	0	0
ENSG00000092203(TOX4)	29.9649	34.0199		ENSG00000124831(LRRFIP1)	36.5415	12.2609	46.5849	18.691		ENSG00000111348(ARHGDIB)	0.908975	3.03322
ENSG00000092208(GEMIN2)	21.833	23.7877		ENSG00000124839(RAB17)	14.6339	5.18827	0.0656904	0.0324461		ENSG00000111358(GTF2H3)	19.1937	8.10468
ENSG00000092295(TGM1)	3.19672	1.05198		ENSG00000124920(MYRF)	0.645313	0.744266	35.8516	50.0557		ENSG00000111371(SLC38A1)	104.805	56.6701
ENSG00000092330(TINF2)	22.7867	25.3625		ENSG00000124942(AHNAK)	65.6798	34.1889	116.388	46.6769		ENSG00000111412(C12orf49)	7.41364	26.3
ENSG00000092421(SEMA6A)	0.967722	1.88603		ENSG00000125089(SH3TC1)	2.60649	0.699268	5.4303	7.36716		ENSG00000111424(VDR)	6.36085	5.57704
ENSG00000092439(TRPM7)	31.7811	22.8184		ENSG00000125124(BBS2)	21.4904	10.5081	10.3658	6.86682		ENSG00000111432(FZD10)	1.25484	0.0257844
ENSG00000092445(TYRO3)	5.22528	2.80184		ENSG00000125148(MT2A)	787.917	983.929	401.575	662.377		ENSG00000111445(RFC5)	29.0962	19.8932
ENSG00000092470(WDR76)	12.6543	9.36945		ENSG00000125257(ABCC4)	3.38472	3.07422	14.1229	5.71971		ENSG00000111602(TIMELESS)	30.5937	25.0221
ENSG00000092531(SNAP23)	14.8371	20.5254		ENSG00000125351(UPF3B)	34.7094	9.76071	10.2361	8.67973		ENSG00000111615(KRR1)	34.8763	37.3736
ENSG00000092621(PHGDH)	29.1275	47.8119		ENSG00000125352(RNF113A)	11.8231	13.3062	10.5641	34.9896		ENSG00000111652(COPS7A)	46.1173	43.7395
ENSG00000092758(COL9A3)	0.414152	0.596551		ENSG00000125398(SOX9)	43.6865	40.9992	7.01811	22.708		ENSG00000111653(ING4)	11.0099	9.80402
ENSG00000092820(EZR)	69.2372	91.86		ENSG00000125430(HS3ST3B1)	0	0.0441455	0.624467	3.71591		ENSG00000111665(CDCA3)	18.4208	14.5942
ENSG00000092841(MYL6)	1243.58	1265.7		ENSG00000125449(ARMC7)	10.3804	30.7544	10.6384	10.8518		ENSG00000111666(CHPT1)	42.4644	9.52456
ENSG00000092847(AGO1)	13.6613	11.0239		ENSG00000125454(SLC25A19)	32.8608	111.165	19.4582	14.0356		ENSG00000111669(TPI1)	776.401	1292.75
ENSG00000092853(CLSPN)	8.30066	8.56496		ENSG00000125462(C1orf61)	2.1419	19.7592	1.40597	3.26201		ENSG00000111670(GNPTAB)	21.4896	8.55876
ENSG00000092871(RFFL)	10.6852	14.1928		ENSG00000125531(FNDC11)	0.0201867	0.138175	0	0.692611		ENSG00000111671(SPSB2)	7.29901	13.3925
ENSG00000092929(UNC13D)	16.4052	14.9245		ENSG00000125538(IL1B)	0	0	0.633251	18.3367		ENSG00000111678(C12orf57)	215.839	387.576
ENSG00000092931(MFSD11)	65.1213	77.3926		ENSG00000125629(INSIG2)	25.0273	9.75833	8.33605	12.4867		ENSG00000111679(PTPN6)	7.35199	13.2904
ENSG00000092964(DPYSL2)	7.12404	3.89365		ENSG00000125637(PSD4)	9.52127	5.13908	0.914232	1.11508		ENSG00000111700(SLCO1B3)	21.9614	8.29595
ENSG00000092969(TGFB2)	6.39526	1.0903		ENSG00000125657(TNFSF9)	2.781	17.4014	9.30471	60.391		ENSG00000111711(GOLT1B)	39.2031	34.4277
ENSG00000092978(GPATCH2)	13.6301	16.2398		ENSG00000125676(THOC2)	33.5636	9.00174	19.8823	17.0005		ENSG00000111716(LDHB)	751.598	731.397
ENSG00000093000(NUP50)	21.9419	21.2838		ENSG00000125703(ATG4C)	9.08913	1.72184	5.77081	1.85626		ENSG00000111728(ST8SIA1)	0	0
ENSG00000093009(CDC45)	24.4327	15.6889		ENSG00000125726(CD70)	0.0847194	4.72093	5.12042	94.8943		ENSG00000111729(CLEC4A)	0.0594715	0.238646
ENSG00000093010(COMT)	75.2502	162.027		ENSG00000125731(SH2D3A)	10.053	16.2817	8.06555	23.0223		ENSG00000111731(C2CD5)	13.8374	5.70429
ENSG00000093144(ECHDC1)	15.8169	21.327		ENSG00000125740(FOSB)	0.830693	1.49736	0.962819	0.934468		ENSG00000111752(PHC1)	3.95306	6.76707
ENSG00000093167(LRRFIP2)	11.6834	12.3127		ENSG00000125744(RTN2)	4.09868	24.876	1.22738	8.55354		ENSG00000111786(SRSF9)	121.785	65.9923
ENSG00000093183(SEC22C)	12.0941	10.5649		ENSG00000125746(EML2)	16.0272	10.949	23.1701	77.9046		ENSG00000111799(COL12A1)	61.7235	24.576
ENSG00000093217(XYLB)	4.00656	4.00058		ENSG00000125780(TGM3)	0.10218	0.245743	1.15056	7.6828		ENSG00000111801(BTN3A3)	6.23945	5.4038
ENSG00000094631(HDAC6)	10.771	7.74977		ENSG00000125826(RBCK1)	51.4136	72.0408	91.597	180.708		ENSG00000111802(TDP2)	41.0675	30.7202
ENSG00000094804(CDC6)	61.2645	47.3411		ENSG00000125835(SNRPB)	197.596	168.843	525.156	177.309		ENSG00000111816(FRK)	0.394124	0.439126
ENSG00000094841(UPRT)	4.4922	3.25762		ENSG00000125845(BMP2)	0.126621	0.0373398	5.22683	26.5507		ENSG00000111817(DSE)	13.0374	4.35699
ENSG00000094880(CDC23)	33.1898	19.048		ENSG00000125877(ITPA)	56.4037	14.3606	87.4841	27.3805		ENSG00000111832(RWDD1)	30.0065	10.7045
ENSG00000094914(AAAS)	31.689	36.6719		ENSG00000125885(MCM8)	12.2642	15.7734	21.0953	6.62582		ENSG00000111837(MAK)	0.0690982	0.387389
ENSG00000094916(CBX5)	58.5771	51.8472		ENSG00000125895(TMEM74B)	0.518359	0.351922	1.38767	12.7508		ENSG00000111845(PAK1IP1)	24.1871	14.2371
ENSG00000094975(SUCO)	17.7599	16.8449		ENSG00000125931(CITED1)	0.757374	1.31343	0.136291	2.38361		ENSG00000111859(NEDD9)	13.5917	9.07927
ENSG00000095002(MSH2)	32.8039	33.5049		ENSG00000125966(MMP24)	1.61489	2.10419	19.6338	3.76954		ENSG00000111860(CEP85L)	2.52687	2.15378
ENSG00000095015(MAP3K1)	11.015	9.53452		ENSG00000125968(ID1)	19.6799	5.61004	272.174	397.597		ENSG00000111877(MCM9)	4.79812	6.32853
ENSG00000095059(DHPS)	111.974	116.894		ENSG00000125995(ROMO1)	77.2302	119.684	214.212	291.544		ENSG00000111879(FAM184A)	0.356378	1.48298
ENSG00000095066(HOOK2)	30.3509	29.4347		ENSG00000125999(BPIFB1)	1.4801	1.12333	0.644925	6.77785		ENSG00000111880(RNGTT)	9.03031	4.78125
ENSG00000095139(ARCN1)	104.045	136.197		ENSG00000126062(TMEM115)	13.632	27.5292	22.2491	81.5702		ENSG00000111885(MAN1A1)	11.2103	2.7312
ENSG00000095203(EPB41L4B)	11.291	8.47821		ENSG00000126216(TUBGCP3)	17.5159	12.0448	14.5025	4.77755		ENSG00000111886(GABRR2)	22.3191	8.93437
ENSG00000095209(TMEM38B)	17.901	14.5342		ENSG00000126217(MCF2L)	21.7489	12.6537	0.40952	1.87867		ENSG00000111897(SERINC1)	54.8849	24.3199
ENSG00000095261(PSMD5)	26.2161	27.1661		ENSG00000126246(IGFLR1)	2.31582	3.30087	8.93338	4.52595		ENSG00000111911(HINT3)	18.2238	7.44106
ENSG00000095303(PTGS1)	0.0666799	0.505973		ENSG00000126259(KIRREL2)	0.0194736	0.0509773	0.134246	1.81087		ENSG00000111912(NCOA7)	138.086	33.654
ENSG00000095319(NUP188)	31.7496	30.3603		ENSG00000126261(UBA2)	113.567	25.7947	103.816	33.3793		ENSG00000111913(FAM65B)	0.252223	0.186163
ENSG00000095321(CRAT)	1.92782	8.0257		ENSG00000126262(FFAR2)	0	0.352369	0.135779	4.11506		ENSG00000111981(ULBP1)	0.840588	1.1507
ENSG00000095380(NANS)	59.1156	84.0328		ENSG00000126368(NR1D1)	3.23677	2.20011	3.79206	9.40046		ENSG00000112078(KCTD20)	33.5912	10.0711
ENSG00000095383(TBC1D2)	7.48768	13.95		ENSG00000126391(FRMD8)	16.0389	16.7419	13.7084	22.6428		ENSG00000112081(SRSF3)	153.616	112.507
ENSG00000095397(WHRN)	9.51107	7.92763		ENSG00000126500(FLRT1)	0.1518	1.00223	0.452414	0.258791		ENSG00000112096(SOD2)	241.624	742.707
ENSG00000095485(CWF19L1)	93.9257	96.4697		ENSG00000126562(WNK4)	0.176068	0.286407	1.19725	3.92399		ENSG00000112118(MCM3)	62.6045	74.7582
ENSG00000095539(SEMA4G)	1.51808	1.70472		ENSG00000126583(PRKCG)	0	0	1.26363	5.57971		ENSG00000112139(MDGA1)	0.355192	1.63408
ENSG00000095564(BTAF1)	10.0973	8.01579		ENSG00000126709(IFI6)	8.99706	3.54439	90.6977	1379.87		ENSG00000112144(ICK)	2.16401	0.711355
ENSG00000095574(IKZF5)	4.90645	3.45831		ENSG00000126767(ELK1)	25.9589	7.68001	17.7739	7.6246		ENSG00000112146(FBXO9)	15.1525	24.8234
ENSG00000095585(BLNK)	0.45885	1.34204		ENSG00000126787(DLGAP5)	25.7209	13.7908	29.9182	2.71354		ENSG00000112149(CD83)	11.0453	28.3849
ENSG00000095596(CYP26A1)	0.268127	1.4174		ENSG00000126790(L3HYPDH)	7.08347	6.03098	23.9999	7.11957		ENSG00000112167(SAYSD1)	3.83235	3.98397
ENSG00000095627(TDRD1)	4.87722	3.40782		ENSG00000126821(SGPP1)	8.39179	2.92005	26.8576	10.2781		ENSG00000112175(BMP5)	0	0
ENSG00000095637(SORBS1)	0.254654	0.188204		ENSG00000126858(RHOT1)	17.7681	5.04599	15.888	11.9846		ENSG00000112183(RBM24)	0	0
ENSG00000095739(BAMBI)	127.062	177.241		ENSG00000126860(EVI2A)	0	0.116707	0.589794	0.541015		ENSG00000112186(CAP2)	19.05	8.85412
ENSG00000095752(IL11)	1.89543	1.6698		ENSG00000126882(FAM78A)	0.99351	1.39589	0.285409	0.345539		ENSG00000112208(BAG2)	11.8222	8.14121
ENSG00000095787(WAC)	45.6208	42.0002		ENSG00000126903(SLC10A3)	31.6796	167.472	19.6469	30.4362		ENSG00000112237(CCNC)	42.8632	13.2962
ENSG00000095794(CREM)	13.2237	16.0933		ENSG00000127084(FGD3)	2.4491	1.81392	0.516186	0.673294		ENSG00000112238(PRDM13)	0	0
ENSG00000095906(NUBP2)	51.155	34.8701		ENSG00000127129(EDN2)	8.64849	0.978491	3.30241	5.15973		ENSG00000112245(PTP4A1)	655.959	91.6378
ENSG00000095951(HIVEP1)	5.65252	4.78606		ENSG00000127220(ABHD8)	27.0623	48.0725	4.13559	17.2824		ENSG00000112249(ASCC3)	20.7516	22.9496
ENSG00000096060(FKBP5)	13.1212	11.063		ENSG00000127314(RAP1B)	64.2274	20.9478	97.7439	84.7579		ENSG00000112293(GPLD1)	0.678897	0.7028
ENSG00000096063(SRPK1)	18.4017	16.4949		ENSG00000127329(PTPRB)	0	0	1.6751	1.71288		ENSG00000112294(ALDH5A1)	15.701	11.2783
ENSG00000096070(BRPF3)	11.0607	10.6083		ENSG00000127334(DYRK2)	6.37115	6.51504	5.4854	12.4764		ENSG00000112299(VNN1)	0.0263893	0.54956
ENSG00000096080(MRPS18A)	34.6536	38.7416		ENSG00000127337(YEATS4)	11.8671	7.76105	27.3424	7.95414		ENSG00000112305(SMAP1)	16.6908	7.73169
ENSG00000096092(TMEM14A)	38.7781	38.1147		ENSG00000127366(TAS2R5)	0.920649	0.093213	0.829174	0.248963		ENSG00000112306(RPS12)	1176.35	1721.99
ENSG00000096093(EFHC1)	4.76854	4.85329		ENSG00000127423(AUNIP)	9.21218	27.6065	4.02179	0.872171		ENSG00000112308(C6orf62)	72.8471	33.9919
ENSG00000096384(HSP90AB1)	662.235	926.023		ENSG00000127452(FBXL12)	32.4539	60.7778	5.68177	16.4736		ENSG00000112312(GMNN)	80.7544	37.4905
ENSG00000096401(CDC5L)	17.3167	13.3757		ENSG00000127483(HP1BP3)	61.5293	34.4738	71.1561	18.5506		ENSG00000112319(EYA4)	15.5869	4.64304
ENSG00000096433(ITPR3)	17.6806	20.7777		ENSG00000127507(ADGRE2)	7.37079	4.77496	0.0855011	1.194		ENSG00000112320(SOBP)	0.20572	0.401796
ENSG00000096654(ZNF184)	2.57404	2.49151		ENSG00000127528(KLF2)	0.367903	3.70051	12.0753	15.3429		ENSG00000112343(TRIM38)	19.0668	24.5201
ENSG00000096696(DSP)	49.4962	38.745		ENSG00000127564(PKMYT1)	29.3234	66.7626	56.5674	20.2051		ENSG00000112379(ARFGEF3)	1.63751	2.50099
ENSG00000096717(SIRT1)	11.1828	7.95643		ENSG00000127580(WDR24)	3.47829	9.54716	7.08792	18.4363		ENSG00000112394(SLC16A10)	1.15826	0.589091
ENSG00000096746(HNRNPH3)	107.2	92.0034		ENSG00000127585(FBXL16)	0.748851	1.84872	1.5644	6.27778		ENSG00000112406(HECA)	6.08699	3.16249
ENSG00000096872(IFT74)	4.25067	2.93602		ENSG00000127586(CHTF18)	7.1764	7.63165	11.8709	3.4225		ENSG00000112414(ADGRG6)	22.9969	5.22518
ENSG00000096968(JAK2)	6.98761	4.1222		ENSG00000127666(TICAM1)	4.35924	11.2679	3.63911	12.7803		ENSG00000112419(PHACTR2)	10.1608	1.74871
ENSG00000097007(ABL1)	12.8773	12.9037		ENSG00000127720(METTL25)	0.943314	0.752078	2.7965	0.732295		ENSG00000112425(EPM2A)	4.17884	3.1389
ENSG00000097021(ACOT7)	37.1344	39.0624		ENSG00000127824(TUBA4A)	2.63123	2.34314	101.923	58.4181		ENSG00000112531(QKI)	27.8972	4.72343
ENSG00000097033(SH3GLB1)	12.495	15.3187		ENSG00000127870(RNF6)	21.7294	6.7869	15.3876	9.35893		ENSG00000112559(MDFI)	0.28907	0.516816
ENSG00000097046(CDC7)	7.57282	7.91291		ENSG00000127920(GNG11)	0.632397	0.697399	93.1749	31.0056		ENSG00000112561(TFEB)	3.55612	8.26596
ENSG00000097096(SYDE2)	7.25972	6.38086		ENSG00000127948(POR)	58.59	71.9754	55.2903	170.372		ENSG00000112576(CCND3)	47.2804	75.5479
ENSG00000099194(SCD)	439.598	357.003		ENSG00000127954(STEAP4)	97.2215	6.00141	0.292386	0.354824		ENSG00000112599(GUCA1B)	0.0353178	0.123384
ENSG00000099203(TMED1)	25.8363	30.2716		ENSG00000127993(RBM48)	4.40838	9.08769	4.91788	14.2478		ENSG00000112697(TMEM30A)	40.1715	23.3875
ENSG00000099204(ABLIM1)	4.54128	4.25914		ENSG00000127995(CASD1)	4.80768	3.45712	7.87609	3.41202		ENSG00000112706(IMPG1)	0	0.0844404
ENSG00000099219(ERMP1)	25.0172	23.734		ENSG00000128011(LRFN1)	2.31739	3.75806	6.13332	16.2539		ENSG00000112715(VEGFA)	90.4586	55.4282
ENSG00000099246(RAB18)	19.5999	21.2378		ENSG00000128016(ZFP36)	14.3833	15.5626	31.9228	104.72		ENSG00000112742(TTK)	23.5152	21.4989
ENSG00000099250(NRP1)	28.7639	25.3859		ENSG00000128039(SRD5A3)	16.8483	45.5377	10.6718	22.11		ENSG00000112759(SLC29A1)	35.5066	44.136
ENSG00000099256(PRTFDC1)	6.03646	3.19067		ENSG00000128052(KDR)	6.03365	1.01646	0	0.0427008		ENSG00000112769(LAMA4)	1.0893	0.536332
ENSG00000099282(TSPAN15)	56.6214	76.1652		ENSG00000128165(ADM2)	7.8406	24.0642	0.137771	0.581859		ENSG00000112782(CLIC5)	0	0.137528
ENSG00000099284(H2AFY2)	14.5714	10.9226		ENSG00000128228(SDF2L1)	21.1289	90.6035	201.325	284.888		ENSG00000112787(FBRSL1)	14.0085	28.2471
ENSG00000099290(WASHC2A)	9.12606	8.74554		ENSG00000128242(GAL3ST1)	0.0537167	0	7.50289	26.4744		ENSG00000112796(ENPP5)	0	0
ENSG00000099308(MAST3)	4.73834	3.18322		ENSG00000128245(YWHAH)	89.5631	228.663	74.5331	88.0111		ENSG00000112812(PRSS16)	3.71573	3.52495
ENSG00000099326(MZF1)	5.92085	6.68081		ENSG00000128274(A4GALT)	0.912202	1.92538	4.76399	55.7145		ENSG00000112837(TBX18)	0.020129	0
ENSG00000099330(OCEL1)	4.40633	5.45719		ENSG00000128283(CDC42EP1)	36.5079	114.845	22.5677	34.7528		ENSG00000112874(NUDT12)	8.22322	2.84557
ENSG00000099331(MYO9B)	4.86367	6.67318		ENSG00000128294(TPST2)	8.97608	6.6091	4.85172	7.60359		ENSG00000112877(CEP72)	13.8698	31.0003
ENSG00000099337(KCNK6)	14.8218	13.232		ENSG00000128335(APOL2)	6.07368	15.0696	25.9135	62.873		ENSG00000112902(SEMA5A)	0.0707234	0.0800909
ENSG00000099338(CATSPERG)	0.740924	0.62672		ENSG00000128340(RAC2)	11.4568	3.96571	0.138833	0.514127		ENSG00000112941(PAPD7)	21.0286	14.4147
ENSG00000099341(PSMD8)	164.908	197.032		ENSG00000128342(LIF)	5.76829	6.07674	24.7366	53.7259		ENSG00000112972(HMGCS1)	12.291	13.403
ENSG00000099364(FBXL19)	25.2069	37.5749		ENSG00000128346(C22orf23)	8.31963	5.43009	2.14651	1.76614		ENSG00000112983(BRD8)	17.1824	14.0197
ENSG00000099365(STX1B)	0.270672	0.258151		ENSG00000128394(APOBEC3F)	5.28709	3.90456	1.32476	4.90464		ENSG00000112984(KIF20A)	26.9001	12.8966
ENSG00000099377(HSD3B7)	24.2824	21.8707		ENSG00000128408(RIBC2)	4.77514	7.56285	5.66436	3.54602		ENSG00000112992(NNT)	54.3644	22.8037
ENSG00000099381(SETD1A)	9.8701	9.36376		ENSG00000128422(KRT17)	53.8622	480.821	2.93926	1.61983		ENSG00000113048(MRPS27)	46.0345	12.6899
ENSG00000099385(BCL7C)	42.1283	32.7731		ENSG00000128482(RNF112)	0.225146	0.340121	0.0555679	0.950342		ENSG00000113070(HBEGF)	2.47409	3.70998
ENSG00000099617(EFNA2)	0.989032	0.536322		ENSG00000128510(CPA4)	12.654	10.1526	2.74799	1.43868		ENSG00000113083(LOX)	25.7344	7.13653
ENSG00000099622(CIRBP)	167.295	144.767		ENSG00000128564(VGF)	0.170828	3.43478	2.34275	1.4007		ENSG00000113194(FAF2)	21.3033	15.842
ENSG00000099624(ATP5D)	240.974	267.614		ENSG00000128595(CALU)	63.861	39.8816	134.375	59.2703		ENSG00000113196(HAND1)	0.032476	0
ENSG00000099625(CBARP)	4.41161	4.3842		ENSG00000128596(CCDC136)	1.5744	2.34251	0.323863	0.87711		ENSG00000113231(PDE8B)	7.78485	2.98543
ENSG00000099769(IGFALS)	17.7569	15.8932		ENSG00000128602(SMO)	5.95353	2.97753	5.04952	3.38131		ENSG00000113248(PCDHB15)	4.78691	6.97097
ENSG00000099783(HNRNPM)	148.463	157.778		ENSG00000128626(MRPS12)	37.0307	101.888	218.114	400.751		ENSG00000113249(HAVCR1)	0.0104031	0
ENSG00000099785(MARCH2)	7.26639	7.73691		ENSG00000128683(GAD1)	0.0560533	0.0220608	0.531587	0.656482		ENSG00000113273(ARSB)	7.716	4.48353
ENSG00000099795(NDUFB7)	250.326	272.722		ENSG00000128791(TWSG1)	45.9916	10.4813	24.1695	10.7966		ENSG00000113319(RASGRF2)	0.111895	0.0489647
ENSG00000099797(TECR)	125.237	125.905		ENSG00000128805(ARHGAP22)	0.257748	0.246436	1.09019	4.25303		ENSG00000113368(LMNB1)	43.8929	74.1234
ENSG00000099800(TIMM13)	58.0794	59.8636		ENSG00000128829(EIF2AK4)	8.67587	2.80011	7.45954	4.4989		ENSG00000113369(ARRDC3)	22.4777	7.18445
ENSG00000099804(CDC34)	32.823	37.7418		ENSG00000128833(MYO5C)	10.4671	10.6452	15.5376	3.54811		ENSG00000113389(NPR3)	1.04871	1.63191
ENSG00000099810(MTAP)	3.71148	2.76216		ENSG00000128849(CGNL1)	2.72807	0.85628	0.110066	0.362978		ENSG00000113391(FAM172A)	3.1825	2.69082
ENSG00000099812(MISP)	22.4053	17.6929		ENSG00000128917(DLL4)	0.0643753	0.123814	0.167831	3.99656		ENSG00000113407(TARS)	210.746	254.303
ENSG00000099814(CEP170B)	32.0364	30.7257		ENSG00000128928(IVD)	12.8064	3.41738	9.6283	3.39312		ENSG00000113430(IRX4)	0.0253577	0
ENSG00000099817(POLR2E)	71.5914	57.0224		ENSG00000128944(KNSTRN)	23.1234	14.5819	23.1951	12.1262		ENSG00000113441(LNPEP)	7.88957	2.44446
ENSG00000099821(POLRMT)	12.5926	12.8491		ENSG00000128951(DUT)	29.4994	37.4034	88.0165	27.326		ENSG00000113448(PDE4D)	33.4366	10.8955
ENSG00000099822(HCN2)	15.631	16.1761		ENSG00000128965(CHAC1)	5.78456	20.1961	2.80964	34.0383		ENSG00000113460(BRIX1)	73.9507	148.056
ENSG00000099840(IZUMO4)	0.843171	2.54764		ENSG00000129055(ANAPC13)	42.9101	12.3437	38.6054	9.27532		ENSG00000113494(PRLR)	0.00490519	0.0992002
ENSG00000099849(RASSF7)	19.9742	17.7863		ENSG00000129116(PALLD)	15.6801	25.9609	35.7379	36.6386		ENSG00000113504(SLC12A7)	0.242255	2.58089
ENSG00000099860(GADD45B)	21.3923	11.6875		ENSG00000129128(SPCS3)	22.9044	10.2689	33.122	11.6544		ENSG00000113532(ST8SIA4)	0	0
ENSG00000099864(PALM)	5.46964	2.45366		ENSG00000129159(KCNC1)	0.0848847	0.938709	0.175719	0		ENSG00000113552(GNPDA1)	19.109	15.8988
ENSG00000099866(MADCAM1)	0.316683	0.811925		ENSG00000129173(E2F8)	6.7531	12.5651	6.73127	1.06484		ENSG00000113555(PCDH12)	0.137638	0.356485
ENSG00000099875(MKNK2)	36.4391	57.2318		ENSG00000129187(DCTD)	17.4784	1.91376	36.8873	11.6976		ENSG00000113578(FGF1)	0	0.0364497
ENSG00000099889(ARVCF)	6.33548	6.22138		ENSG00000129195(FAM64A)	9.56043	11.4979	34.3078	1.53404		ENSG00000113580(NR3C1)	45.7154	14.9406
ENSG00000099899(TRMT2A)	10.057	12.907		ENSG00000129226(CD68)	1.224	4.72314	14.3188	132.364		ENSG00000113583(C5orf15)	43.5967	19.1823
ENSG00000099901(RANBP1)	168.3	147.398		ENSG00000129292(PHF20L1)	13.937	6.82932	18.4504	13.213		ENSG00000113595(TRIM23)	3.46709	1.50271
ENSG00000099904(ZDHHC8)	11.0237	9.70586		ENSG00000129351(ILF3)	212.297	168.574	93.9722	27.8511		ENSG00000113638(TTC33)	28.8819	12.914
ENSG00000099910(KLHL22)	13.4815	13.6171		ENSG00000129354(AP1M2)	176.944	129.19	21.5509	5.97445		ENSG00000113643(RARS)	66.6173	37.7925
ENSG00000099917(MED15)	19.65	19.9958		ENSG00000129451(KLK10)	19.3812	11.8117	0.503012	6.05961		ENSG00000113645(WWC1)	52.503	26.219
ENSG00000099940(SNAP29)	11.3708	13.7433		ENSG00000129484(PARP2)	34.0797	55.549	20.8423	18.596		ENSG00000113648(H2AFY)	73.3367	39.8808
ENSG00000099942(CRKL)	20.207	27.9683		ENSG00000129521(EGLN3)	49.5821	18.2513	10.0232	77.8261		ENSG00000113657(DPYSL3)	6.56411	8.42002
ENSG00000099949(LZTR1)	5.60555	5.6673		ENSG00000129534(MIS18BP1)	12.9933	11.0155	17.2904	8.15547		ENSG00000113719(ERGIC1)	141.837	21.3871
ENSG00000099954(CECR2)	0.631265	0.747506		ENSG00000129625(REEP5)	84.9927	27.0776	59.6977	29.8785		ENSG00000113732(ATP6V0E1)	105.141	206.4
ENSG00000099956(SMARCB1)	66.7015	30.2621		ENSG00000129636(ITFG1)	54.3381	14.7592	50.7532	37.0358		ENSG00000113739(STC2)	35.4461	46.8188
ENSG00000099968(BCL2L13)	13.582	13.8155		ENSG00000129654(FOXJ1)	0.134046	5.67511	0	0		ENSG00000113742(CPEB4)	17.039	9.04785
ENSG00000099974(DDTL)	1.38119	1.46568		ENSG00000129657(SEC14L1)	62.612	30.942	9.45246	7.84102		ENSG00000113749(HRH2)	0	0.0389413
ENSG00000099977(DDT)	87.1625	105.975		ENSG00000129667(RHBDF2)	7.28968	29.7758	8.23715	33.3545		ENSG00000113763(UNC5A)	0	0.0519388
ENSG00000099991(CABIN1)	11.0541	9.63395		ENSG00000129675(ARHGEF6)	25.5388	5.71124	0.109794	0.3874		ENSG00000113790(EHHADH)	2.51914	0.621052
ENSG00000099992(TBC1D10A)	17.1672	17.1104		ENSG00000129810(SGO1)	5.31938	7.61807	13.0762	2.29026		ENSG00000113810(SMC4)	97.139	47.2605
ENSG00000099994(SUSD2)	2.83227	3.01525		ENSG00000129932(DOHH)	3.98843	16.9892	16.2849	22.3049		ENSG00000113838(TBCCD1)	6.35212	3.86068
ENSG00000099995(SF3A1)	23.8365	22.6539		ENSG00000129946(SHC2)	0.251058	0.180855	0.82623	2.40927		ENSG00000113916(BCL6)	11.5408	5.17067
ENSG00000099999(RNF215)-3	5.33309	6.03467		ENSG00000129988(LBP)	0.120221	0.0683147	1.74207	9.02667		ENSG00000113924(HGD)	0	0
ENSG00000100003(SEC14L2)	24.8357	21.6551		ENSG00000129991(TNNI3)	0.258511	0.178578	0.850185	9.07788		ENSG00000113946(CLDN16)	0.0379721	0
ENSG00000100014(SPECC1L)	9.53436	10.459		ENSG00000130021(PUDP)	13.7341	4.0086	14.9415	7.58073		ENSG00000114019(AMOTL2)	26.8804	19.6835
ENSG00000100023(PPIL2)	17.1519	21.6502		ENSG00000130066(SAT1)	899.243	142.061	217.349	565.546		ENSG00000114023(FAM162A)	43.755	41.8733
ENSG00000100027(YPEL1)	1.0398	0.864857		ENSG00000130147(SH3BP4)	26.7051	14.0415	13.7029	4.68041		ENSG00000114054(PCCB)	35.8519	26.7983
ENSG00000100028(SNRPD3)	79.134	118.237		ENSG00000130158(DOCK6)	8.79906	8.82397	3.55385	7.18545		ENSG00000114107(CEP70)	11.4088	5.70091
ENSG00000100029(PES1)	42.9618	41.8816		ENSG00000130164(LDLR)	34.6137	37.8507	25.5836	31.9849		ENSG00000114120(SLC25A36)	37.3305	22.1017
ENSG00000100030(MAPK1)	37.2793	25.6802		ENSG00000130193(THEM6)	57.4479	47.3449	45.4946	32.4732		ENSG00000114127(XRN1)	10.597	5.40278
ENSG00000100031(GGT1)	0.704892	1.4361		ENSG00000130202(NECTIN2)	71.1472	84.6551	64.0729	220.799		ENSG00000114166(KAT2B)	4.57072	2.20768
ENSG00000100034(PPM1F)	7.74509	9.58554		ENSG00000130203(APOE)	0.98425	4.43483	0.197716	5.88317		ENSG00000114209(PDCD10)	51.9172	17.485
ENSG00000100036(SLC35E4)	1.81619	1.78354		ENSG00000130222(GADD45G)	5.63658	43.3262	0.419154	0.2085		ENSG00000114248(LRRC31)	0	0
ENSG00000100038(TOP3B)	15.3791	14.2739		ENSG00000130234(ACE2)	0.0503108	0.637554	0.28396	0.442242		ENSG00000114251(WNT5A)	29.4581	11.5029
ENSG00000100056(DGCR14)	7.12337	7.83469		ENSG00000130294(KIF1A)	0.25604	1.60663	0.302468	0.00694808		ENSG00000114268(PFKFB4)	5.40096	6.05789
ENSG00000100065(CARD10)	3.05137	2.34183		ENSG00000130303(BST2)	27.6917	4.08289	6.39155	65.1338		ENSG00000114270(COL7A1)	45.237	100.991
ENSG00000100068(LRP5L)	3.17855	2.74077		ENSG00000130304(SLC27A1)	13.9018	9.27901	1.62914	5.67017		ENSG00000114302(PRKAR2A)	22.2195	11.0387
ENSG00000100075(SLC25A1)	165.479	141.575		ENSG00000130347(RTN4IP1)	16.1873	4.83229	12.0342	6.16929		ENSG00000114315(HES1)	13.0405	15.5985
ENSG00000100077(GRK3)	12.67	16.2689		ENSG00000130348(QRSL1)	22.0757	8.0209	7.79508	4.38877		ENSG00000114346(ECT2)	55.9042	19.8279
ENSG00000100083(GGA1)	13.401	16.0703		ENSG00000130475(FCHO1)	2.75345	2.25449	4.58974	16.6015		ENSG00000114378(HYAL1)	23.9058	12.7403
ENSG00000100084(HIRA)	14.428	17.6093		ENSG00000130477(UNC13A)	0.593981	2.40834	1.96679	7.1781		ENSG00000114383(TUSC2)	23.0301	22.2638
ENSG00000100092(SH3BP1)	5.45117	5.63081		ENSG00000130479(MAP1S)	17.7689	39.8374	7.84716	42.4887		ENSG00000114391(RPL24)	659.959	1054.59
ENSG00000100097(LGALS1)	146.207	184.893		ENSG00000130487(KLHDC7B)	0.174917	0.598824	0.550404	1.35806		ENSG00000114405(C3orf14)	5.13184	19.4693
ENSG00000100099(HPS4)	7.18759	5.78699		ENSG00000130511(SSBP4)	29.881	76.7014	29.6324	55.2725		ENSG00000114423(CBLB)	4.20754	7.4155
ENSG00000100100(PIK3IP1)	1.33452	0.775835		ENSG00000130513(GDF15)	1.55376	56.7166	42.6188	439.937		ENSG00000114439(BBX)	28.2165	14.9015
ENSG00000100104(SRRD)	4.19455	3.30819		ENSG00000130517(PGPEP1)	9.96164	11.6087	1.49444	9.09887		ENSG00000114450(GNB4)	14.1804	4.73851
ENSG00000100105(PATZ1)	36.768	32.1342		ENSG00000130518(KIAA1683)	0.203071	1.59774	0.119799	0.175482		ENSG00000114455(HHLA2)	0	0
ENSG00000100106(TRIOBP)	13.9805	14.0275		ENSG00000130522(JUND)	42.1666	161.681	52.3976	130.117		ENSG00000114480(GBE1)	48.5412	22.144
ENSG00000100109(TFIP11)	11.8782	12.1689		ENSG00000130589(HELZ2)	3.26975	6.28193	6.72801	49.3811		ENSG00000114529(C3orf52)	7.86802	7.21366
ENSG00000100116(GCAT)	9.10792	8.9064		ENSG00000130669(PAK4)	50.0344	46.1637	50.1295	97.3213		ENSG00000114541(FRMD4B)	1.34443	1.51284
ENSG00000100124(ANKRD54)	10.4347	11.9626		ENSG00000130675(MNX1)	2.35109	7.01182	5.46068	8.53942		ENSG00000114554(PLXNA1)	6.37092	9.21307
ENSG00000100129(EIF3L)	68.4168	85.2743		ENSG00000130700(GATA5)	0.391646	0.119247	0.0946769	0.278408		ENSG00000114573(ATP6V1A)	43.3935	11.7325
ENSG00000100138(SNU13)	63.247	76.535		ENSG00000130701(RBBP8NL)	3.18431	0.862737	0	0		ENSG00000114626(ABTB1)	12.0897	9.81847
ENSG00000100139(MICALL1)	6.98422	5.60986		ENSG00000130707(ASS1)	248.264	218.576	48.942	174.338		ENSG00000114646(CSPG5)	2.18694	5.98764
ENSG00000100142(POLR2F)	35.2485	36.9153		ENSG00000130720(FIBCD1)	0.737599	5.40838	6.09911	11.3522		ENSG00000114698(PLSCR4)	13.8039	4.59473
ENSG00000100147(CCDC134)	2.74154	3.08484		ENSG00000130749(ZC3H4)	8.04303	5.73485	9.99164	3.18838		ENSG00000114737(CISH)	1.00142	1.88877
ENSG00000100150(DEPDC5)	3.25951	5.44677		ENSG00000130766(SESN2)	5.25575	13.442	3.20486	8.37848		ENSG00000114738(MAPKAPK3)	13.8557	14.4747
ENSG00000100151(PICK1)	10.9503	12.4588		ENSG00000130768(SMPDL3B)	21.3295	32.0473	0.138727	0.860039		ENSG00000114742(WDR48)	10.071	3.27965
ENSG00000100154(TTC28)	0.702226	0.590818		ENSG00000130775(THEMIS2)	0.142851	0.548066	0.248895	4.32141		ENSG00000114744(COMMD2)	16.727	14.0971
ENSG00000100156(SLC16A8)	0.696796	1.47417		ENSG00000130813(C19orf66)	14.8124	15.7703	3.38815	9.56099		ENSG00000114770(ABCC5)	9.73671	10.2456
ENSG00000100162(CENPM)	29.021	22.7311		ENSG00000130816(DNMT1)	123.541	81.9551	28.3366	8.56119		ENSG00000114771(AADAC)	0	0
ENSG00000100167(SEPT3)	1.78253	2.04081		ENSG00000130821(SLC6A8)	6.83688	8.71758	5.48516	80.9656		ENSG00000114786(ABHD14A-ACY1)	31.1997	28.9635
ENSG00000100196(KDELR3)	9.10778	8.33477		ENSG00000130822(PNCK)	3.57068	0.337958	0.0453148	2.22058		ENSG00000114796(KLHL24)	9.556	5.63638
ENSG00000100201(DDX17)	75.6135	72.9451		ENSG00000130826(DKC1)	59.7549	27.103	64.1216	14.3608		ENSG00000114805(PLCH1)	0	0
ENSG00000100206(DMC1)	2.12715	0.59802		ENSG00000130827(PLXNA3)	15.1513	16.5868	1.91509	5.48448		ENSG00000114812(VIPR1)	0	0
ENSG00000100207(TCF20)	8.86539	7.99943		ENSG00000130829(DUSP9)	0.281751	2.87013	1.71483	4.64278		ENSG00000114841(DNAH1)	0.147991	0.256284
ENSG00000100209(HSCB)	17.945	20.9957		ENSG00000130830(MPP1)	0.682487	0.471683	5.86699	1.7662		ENSG00000114854(TNNC1)	2.98466	4.69442
ENSG00000100211(CBY1)	9.46696	12.1571		ENSG00000130881(LRP3)	17.875	65.3832	47.4743	62.9706		ENSG00000114902(SPCS1)	121.848	33.2333
ENSG00000100216(TOMM22)	55.0022	47.1277		ENSG00000131015(ULBP2)	8.72517	27.8499	5.53037	14.9819		ENSG00000114904(NEK4)	9.12472	5.02363
ENSG00000100219(XBP1)	720.316	528.038		ENSG00000131019(ULBP3)	1.92868	6.16018	2.12778	5.29763		ENSG00000114942(EEF1B2)	274.769	385.918
ENSG00000100220(RTCB)	44.4644	45.0455		ENSG00000131023(LATS1)	6.75205	4.49313	8.04777	5.64631		ENSG00000114978(MOB1A)	32.273	15.4684
ENSG00000100221(JOSD1)	12.6844	12.3337		ENSG00000131037(EPS8L1)	28.0853	26.1437	2.65111	1.90941		ENSG00000114988(LMAN2L)	9.50534	5.8034
ENSG00000100225(FBXO7)	43.3015	42.5449		ENSG00000131080(EDA2R)	0	0	2.57253	5.63436		ENSG00000115008(IL1A)	13.8614	4.061
ENSG00000100226(GTPBP1)	4.93378	4.40409		ENSG00000131089(ARHGEF9)	13.1365	14.7662	4.88738	4.6417		ENSG00000115009(CCL20)	8.68883	4.01064
ENSG00000100227(POLDIP3)	20.3401	17.8011		ENSG00000131094(C1QL1)	2.73492	44.6501	23.1467	38.4212		ENSG00000115084(SLC35F5)	18.653	9.11331
ENSG00000100228(RAB36)	0.848711	0.578093		ENSG00000131127(ZNF141)	3.86764	5.86116	1.8845	1.04957		ENSG00000115112(TFCP2L1)	0	0.0104345
ENSG00000100234(TIMP3)	19.0308	14.5715		ENSG00000131153(GINS2)	21.2912	43.4233	18.7666	1.8783		ENSG00000115129(TP53I3)	18.1838	32.6014
ENSG00000100239(PPP6R2)	11.0455	13.2668		ENSG00000131187(F12)	1.33064	2.43786	3.13729	8.89538		ENSG00000115159(GPD2)	31.9981	10.3713
ENSG00000100241(SBF1)	15.6379	13.0135		ENSG00000131188(PRR7)	6.64105	18.2271	23.9143	35.3621		ENSG00000115163(CENPA)	23.1928	5.92318
ENSG00000100242(SUN2)	17.8647	14.498		ENSG00000131196(NFATC1)	0.0281354	0.183014	1.75075	4.43879		ENSG00000115165(CYTIP)	0	0.686304
ENSG00000100243(CYB5R3)	34.18	31.9294		ENSG00000131203(IDO1)	0	0	0.217694	9.25864		ENSG00000115221(ITGB6)	0.390448	0.0289887
ENSG00000100258(LMF2)	17.8258	23.1614		ENSG00000131238(PPT1)	120.62	52.9429	37.5861	12.9137		ENSG00000115234(SNX17)	43.647	22.5165
ENSG00000100263(RHBDD3)	16.2624	21.0194		ENSG00000131242(RAB11FIP4)	8.66004	12.6492	0.802696	2.8742		ENSG00000115252(PDE1A)	42.8602	4.77198
ENSG00000100266(PACSIN2)	19.4521	17.5597		ENSG00000131351(HAUS8)	14.0714	21.2361	6.5626	5.50824		ENSG00000115255(REEP6)	3.87295	2.9097
ENSG00000100271(TTLL1)	1.20482	1.2167		ENSG00000131370(SH3BP5)	13.2462	3.81484	4.26171	3.42517		ENSG00000115266(APC2)	0.365047	1.94145
ENSG00000100276(RASL10A)	1.74453	2.34334		ENSG00000131374(TBC1D5)	13.1783	3.91948	19.1656	8.35391		ENSG00000115267(IFIH1)	45.4243	206.884
ENSG00000100280(AP1B1)	42.4157	49.8089		ENSG00000131409(LRRC4B)	0	0	0.132227	1.77708		ENSG00000115271(GCA)	11.1621	19.9453
ENSG00000100281(HMGXB4)	9.10757	10.5021		ENSG00000131459(GFPT2)	0.745063	3.08629	27.6175	61.9722		ENSG00000115289(PCGF1)	21.0772	25.2088
ENSG00000100284(TOM1)	5.75038	10.3716		ENSG00000131467(PSME3)	41.0061	26.3606	96.8228	28.1244		ENSG00000115295(CLIP4)	1.02358	1.56095
ENSG00000100288(CHKB)	8.73897	7.86589		ENSG00000131470(PSMC3IP)	17.1801	49.3962	14.3787	5.3721		ENSG00000115318(LOXL3)	2.97583	4.66758
ENSG00000100290(BIK)	4.06932	7.03939		ENSG00000131471(AOC3)	0.309193	1.51345	0.986739	4.18357		ENSG00000115325(DOK1)	8.21796	20.2041
ENSG00000100292(HMOX1)	3.23388	37.3341		ENSG00000131473(ACLY)	112.123	43.5596	99.7199	30.9414		ENSG00000115350(POLE4)	20.37	63.123
ENSG00000100294(MCAT)	12.0748	13.922		ENSG00000131507(NDFIP1)	30.3502	10.4235	58.6558	46.0392		ENSG00000115353(TACR1)	0.105446	0.0752966
ENSG00000100296(THOC5)	66.5169	90.7049		ENSG00000131584(ACAP3)	10.9553	33.238	12.8525	9.81342		ENSG00000115355(CCDC88A)	18.4758	11.6764
ENSG00000100297(MCM5)	43.0908	35.8897		ENSG00000131650(KREMEN2)	0.973242	3.30178	0.930397	3.29643		ENSG00000115363(EVA1A)	8.9484	10.5238
ENSG00000100299(ARSA)	6.17567	8.0137		ENSG00000131668(BARX1)	0	0	0.120231	2.64622		ENSG00000115365(LANCL1)	56.2162	10.0173
ENSG00000100300(TSPO)	35.108	35.2171		ENSG00000131669(NINJ1)	34.9507	28.7644	29.4488	122.046		ENSG00000115380(EFEMP1)	89.8217	39.106
ENSG00000100304(TTLL12)	19.5625	16.0535		ENSG00000131724(IL13RA1)	34.3996	8.69775	31.3107	13.2515		ENSG00000115414(FN1)	34.7429	63.9508
ENSG00000100307(CBX7)	3.54583	2.10328		ENSG00000131746(TNS4)	3.21698	4.10723	82.3199	57.615		ENSG00000115415(STAT1)	127.246	26.5415
ENSG00000100311(PDGFB)	15.8594	9.86649		ENSG00000131747(TOP2A)	68.5653	9.60458	129.313	6.41325		ENSG00000115419(GLS)	79.0113	30.2666
ENSG00000100316(RPL3)	741.369	784.486		ENSG00000131773(KHDRBS3)	0	1.58953	3.55954	5.4368		ENSG00000115457(IGFBP2)	0.0357442	0
ENSG00000100319(ZMAT5)	10.9918	13.1219		ENSG00000131779(PEX11B)	13.5016	4.17261	13.674	10.898		ENSG00000115461(IGFBP5)	0	0.0252935
ENSG00000100320(RBFOX2)	10.5551	9.39712		ENSG00000131781(FMO5)	2.07525	0.397566	0.710647	2.07649		ENSG00000115464(USP34)	26.0124	17.6034
ENSG00000100321(SYNGR1)	12.4645	9.14466		ENSG00000131844(MCCC2)	38.737	6.95899	37.7047	8.97652		ENSG00000115468(EFHD1)	2.46672	2.45785
ENSG00000100324(TAB1)	5.57152	7.0327		ENSG00000131899(LLGL1)	8.46605	15.4013	10.092	10.2252		ENSG00000115484(CCT4)	122.06	84.3128
ENSG00000100325(ASCC2)	33.0374	22.6793		ENSG00000131931(THAP1)	5.75291	9.29681	8.25167	5.18497		ENSG00000115504(EHBP1)	13.7457	9.8085
ENSG00000100330(MTMR3)	8.72583	7.82502		ENSG00000131941(RHPN2)	54.1204	27.0986	28.6528	41.2096		ENSG00000115507(OTX1)	2.21698	5.96222
ENSG00000100335(MIEF1)	7.9055	8.33628		ENSG00000131943(C19orf12)	9.36017	6.01617	25.3262	15.6961		ENSG00000115520(COQ10B)	21.3424	7.25033
ENSG00000100336(APOL4)	7.36908	9.39925		ENSG00000131944(FAAP24)	4.15126	7.71464	7.97139	2.81177		ENSG00000115524(SF3B1)	74.8274	22.327
ENSG00000100342(APOL1)	0.506628	0.198808		ENSG00000131966(ACTR10)	36.8824	13.2201	28.5551	15.3038		ENSG00000115525(ST3GAL5)	1.84482	1.15101
ENSG00000100345(MYH9)	68.5905	53.9443		ENSG00000132003(ZSWIM4)	10.342	10.1661	2.91194	14.1985		ENSG00000115526(CHST10)	1.22964	5.12696
ENSG00000100347(SAMM50)	27.0282	25.849		ENSG00000132016(C19orf57)	2.75919	18.6364	0.582899	0.958054		ENSG00000115539(PDCL3)	12.7107	39.6394
ENSG00000100348(TXN2)	66.7425	87.1339		ENSG00000132024(CC2D1A)	25.248	35.3899	8.91306	17.3696		ENSG00000115548(KDM3A)	12.7882	9.30602
ENSG00000100353(EIF3D)	82.6537	80.1157		ENSG00000132031(MATN3)	0.0938967	0.0565154	3.33817	1.34824		ENSG00000115556(PLCD4)	0.540964	0.779753
ENSG00000100354(TNRC6B)	3.63957	5.04308		ENSG00000132109(TRIM21)	3.37366	5.02636	8.72995	28.3024		ENSG00000115561(CHMP3)	26.544	27.7081
ENSG00000100359(SGSM3)	11.0686	12.9373		ENSG00000132170(PPARG)	6.66551	15.5152	16.678	38.1585		ENSG00000115594(IL1R1)	4.28326	3.76021
ENSG00000100360(IFT27)	13.3184	15.1742		ENSG00000132199(ENOSF1)	33.8374	13.549	13.4182	2.35708		ENSG00000115596(WNT6)	0.205528	0.614151
ENSG00000100364(KIAA0930)	12.3304	10.6322		ENSG00000132274(TRIM22)	8.15723	1.56955	2.71971	31.2431		ENSG00000115616(SLC9A2)	0	0
ENSG00000100372(SLC25A17)	81.7102	72.3209		ENSG00000132286(TIMM10B)	22.9668	13.0463	14.8396	21.2508		ENSG00000115641(FHL2)	148.618	81.1543
ENSG00000100376(FAM118A)	12.2581	13.929		ENSG00000132294(EFR3A)	31.6311	8.55866	28.7657	13.2824		ENSG00000115649(CNPPD1)	20.4972	76.267
ENSG00000100379(KCTD17)	7.36125	8.41354		ENSG00000132326(PER2)	1.91934	0.905549	5.91999	2.54511		ENSG00000115652(UXS1)	11.9187	4.62303
ENSG00000100387(RBX1)	31.452	40.1836		ENSG00000132341(RAN)	264.003	179.008	439.391	85.8412		ENSG00000115657(ABCB6)	12.7753	16.3205
ENSG00000100393(EP300)	12.8404	14.1727		ENSG00000132356(PRKAA1)	34.2381	13.8777	22.5403	17.6805		ENSG00000115738(ID2)	20.5901	15.5231
ENSG00000100395(L3MBTL2)	9.23209	8.49196		ENSG00000132383(RPA1)	37.2872	14.6005	35.664	9.93444		ENSG00000115750(TAF1B)	9.87563	10.2103
ENSG00000100401(RANGAP1)	47.6001	42.7581		ENSG00000132394(EEFSEC)	16.5136	28.3434	9.35256	30.0645		ENSG00000115756(HPCAL1)	92.1627	69.1846
ENSG00000100403(ZC3H7B)	15.1947	14.1042		ENSG00000132429(POPDC3)	11.8582	18.5702	2.20471	6.31941		ENSG00000115758(ODC1)	66.4556	26.3488
ENSG00000100410(PHF5A)	29.495	26.2251		ENSG00000132436(FIGNL1)	15.4933	14.3623	17.1702	3.09436		ENSG00000115808(STRN)	11.21	7.27273
ENSG00000100412(ACO2)	32.4061	38.8161		ENSG00000132463(GRSF1)	38.2193	7.74495	46.0229	16.489		ENSG00000115827(DCAF17)	4.68614	4.98591
ENSG00000100413(POLR3H)	14.5903	21.1636		ENSG00000132470(ITGB4)	36.3626	27.3063	42.0139	57.5034		ENSG00000115828(QPCT)	0.0964184	0
ENSG00000100416(TRMU)	8.73393	6.89988		ENSG00000132471(WBP2)	86.992	101.315	35.3013	112.611		ENSG00000115840(SLC25A12)	13.4382	6.16325
ENSG00000100417(PMM1)	13.8898	11.7441		ENSG00000132517(SLC52A1)	0.0685068	0	0.0379303	5.07259		ENSG00000115844(DLX2)	4.88598	3.30396
ENSG00000100418(DESI1)	11.9614	16.4049		ENSG00000132530(XAF1)	1.09103	0.67797	0.595369	9.42053		ENSG00000115884(SDC1)	19.733	17.9457
ENSG00000100422(CERK)	7.35138	7.51364		ENSG00000132535(DLG4)	3.6608	3.87017	2.49968	4.84793		ENSG00000115902(SLC1A4)	11.2609	11.7772
ENSG00000100425(BRD1)	9.1261	7.40011		ENSG00000132563(REEP2)	2.37899	2.22766	0.233461	3.16054		ENSG00000115919(KYNU)	278.396	84.1926
ENSG00000100426(ZBED4)	5.94907	5.11797		ENSG00000132570(PCBD2)	5.42231	6.10415	10.375	3.00211		ENSG00000115935(WIPF1)	32.8655	11.885
ENSG00000100429(HDAC10)	13.7298	19.6902		ENSG00000132623(ANKEF1)	5.13048	3.68407	20.2703	15.0663		ENSG00000115963(RND3)	36.6388	58.3887
ENSG00000100439(ABHD4)	7.54923	12.59		ENSG00000132639(SNAP25)	0	0.0354585	14.8648	21.0747		ENSG00000115966(ATF2)	20.3112	8.98267
ENSG00000100441(KHNYN)	22.736	17.3094		ENSG00000132640(BTBD3)	12.7272	8.86255	15.3902	11.7358		ENSG00000115970(THADA)	7.58037	6.26588
ENSG00000100442(FKBP3)	87.6832	120.336		ENSG00000132661(NXT1)	14.5774	43.1574	34.5392	72.0225		ENSG00000116001(TIA1)	19.5733	29.3681
ENSG00000100445(SDR39U1)	46.1792	46.3041		ENSG00000132669(RIN2)	7.02693	2.99546	12.1216	15.4343		ENSG00000116005(PCYOX1)	22.9674	17.2431
ENSG00000100461(RBM23)	47.8161	45.5839		ENSG00000132680(KIAA0907)	26.7827	45.229	15.4408	24.9483		ENSG00000116014(KISS1R)	0	0
ENSG00000100462(PRMT5)	88.8348	78.7719		ENSG00000132688(NES)	1.67788	4.49554	0.158926	0.687905		ENSG00000116016(EPAS1)	48.5641	23.1741
ENSG00000100473(COCH)	3.04528	1.76063		ENSG00000132744(ACY3)	1.03345	1.89778	0.883998	4.38214		ENSG00000116017(ARID3A)	4.14845	7.72047
ENSG00000100478(AP4S1)	6.29305	6.6339		ENSG00000132749(TESMIN)	12.7251	5.08033	4.73525	3.22269		ENSG00000116032(GRIN3B)	0.0338955	0.0491853
ENSG00000100479(POLE2)	14.0061	13.0549		ENSG00000132763(MMACHC)	2.80938	0.365595	1.59434	0.702936		ENSG00000116035(VAX2)	0.0594815	0.0513138
ENSG00000100483(VCPKMT)	18.0528	16.6312		ENSG00000132768(DPH2)	16.5441	12.0507	18.0105	7.52705		ENSG00000116095(PLEKHA3)	3.17348	0.92232
ENSG00000100490(CDKL1)	1.44545	1.12352		ENSG00000132821(VSTM2L)	12.8408	16.6225	0.207501	3.25587		ENSG00000116106(EPHA4)	0.008798	0
ENSG00000100503(NIN)	11.3224	11.2684		ENSG00000132823(OSER1)	36.1899	67.3768	22.1082	52.7493		ENSG00000116117(PARD3B)	1.86002	1.23855
ENSG00000100504(PYGL)	17.9847	23.5618		ENSG00000132840(BHMT2)	0.823648	2.27906	0	0		ENSG00000116133(DHCR24)	76.7028	63.3028
ENSG00000100519(PSMC6)	123.717	109.71		ENSG00000132854(KANK4)	0.0347988	0.0428908	0.10418	0		ENSG00000116161(CACYBP)	74.3097	57.1986
ENSG00000100522(GNPNAT1)	68.3349	69.3132		ENSG00000132879(FBXO44)	8.972	11.5154	8.23211	21.8634		ENSG00000116171(SCP2)	35.1365	9.49416
ENSG00000100523(DDHD1)	10.1366	7.6412		ENSG00000132906(CASP9)	4.86978	4.64533	7.26919	10.6969		ENSG00000116183(PAPPA2)	0.0340561	0
ENSG00000100526(CDKN3)	73.1529	63.5016		ENSG00000132911(NMUR2)	0	0	1.19163	4.75438		ENSG00000116191(RALGPS2)	14.9816	2.02027
ENSG00000100528(CNIH1)	143.624	120.532		ENSG00000132912(DCTN4)	18.4711	6.17996	14.8698	7.68018		ENSG00000116199(FAM20B)	13.5875	6.88766
ENSG00000100532(CGRRF1)	10.2048	9.27079		ENSG00000132953(XPO4)	8.66418	10.2821	15.9569	6.09055		ENSG00000116213(WRAP73)	12.1683	22.6563
ENSG00000100554(ATP6V1D)	26.4823	24.7144		ENSG00000132970(WASF3)	0.0126426	0	0.0333758	0.135711		ENSG00000116237(ICMT)	45.523	20.7359
ENSG00000100558(PLEK2)	4.58989	2.29237		ENSG00000133019(CHRM3)	1.67904	2.29954	1.14665	3.3384		ENSG00000116254(CHD5)	0.0152337	0.0171558
ENSG00000100564(PIGH)	15.3464	11.4809		ENSG00000133056(PIK3C2B)	7.8421	4.16694	13.3475	11.7862		ENSG00000116260(QSOX1)	74.83	91.1327
ENSG00000100567(PSMA3)	242.732	356.594		ENSG00000133059(DSTYK)	5.18461	3.25504	5.09924	3.53684		ENSG00000116285(ERRFI1)	24.4022	7.56244
ENSG00000100575(TIMM9)	34.1179	52.7185		ENSG00000133067(LGR6)	4.24168	3.24368	3.49643	4.45999		ENSG00000116288(PARK7)	195.823	285.088
ENSG00000100577(GSTZ1)	48.4516	58.6221		ENSG00000133083(DCLK1)	0.0657558	0.0266961	3.8473	0.502115		ENSG00000116299(KIAA1324)	0.546982	0.237993
ENSG00000100578(KIAA0586)	7.01249	7.7784		ENSG00000133103(COG6)	9.5005	1.0134	4.54433	2.635		ENSG00000116396(KCNC4)	5.98987	9.22543
ENSG00000100580(TMED8)	14.8453	12.0251		ENSG00000133111(RFXAP)	2.97649	2.21997	3.35942	1.94659		ENSG00000116406(EDEM3)	12.6764	6.93643
ENSG00000100583(SAMD15)	1.88352	0.96073		ENSG00000133119(RFC3)	36.6423	17.1818	38.8493	9.18618		ENSG00000116455(WDR77)	24.3268	37.9222
ENSG00000100591(AHSA1)	122.638	174.66		ENSG00000133121(STARD13)	9.22981	2.72024	1.5701	4.42754		ENSG00000116560(SFPQ)	93.9679	62.6163
ENSG00000100592(DAAM1)	22.6569	14.636		ENSG00000133131(MORC4)	14.0026	10.5858	72.1851	24.0059		ENSG00000116574(RHOU)	2.83701	1.59799
ENSG00000100596(SPTLC2)	22.0947	16.2929		ENSG00000133302(SLF1)	4.16217	5.75579	7.14826	2.30397		ENSG00000116584(ARHGEF2)	34.8872	44.2163
ENSG00000100599(RIN3)	1.45951	1.87202		ENSG00000133315(MACROD1)	85.4261	29.3352	5.53798	12.7688		ENSG00000116649(SRM)	94.9013	107.347
ENSG00000100600(LGMN)	23.1667	27.727		ENSG00000133316(WDR74)	28.8446	83.0927	34.3902	64.899		ENSG00000116661(FBXO2)	15.8148	20.4019
ENSG00000100601(ALKBH1)	14.9402	14.9804		ENSG00000133321(RARRES3)	150.059	82.2709	59.3921	77.2724		ENSG00000116667(C1orf21)	3.01235	3.3551
ENSG00000100603(SNW1)	43.7191	39.0958		ENSG00000133398(MED10)	44.5415	151.089	40.7621	43.6024		ENSG00000116679(IVNS1ABP)	64.3557	28.7421
ENSG00000100605(ITPK1)	129.029	105.311		ENSG00000133401(PDZD2)	3.81291	1.32797	0.0778348	0.0990495		ENSG00000116690(PRG4)	0.182575	0.0280221
ENSG00000100612(DHRS7)	30.5731	54.3871		ENSG00000133454(MYO18B)	0	0	0.0302567	0.245224		ENSG00000116701(NCF2)	25.6799	94.836
ENSG00000100614(PPM1A)	29.2824	26.0606		ENSG00000133466(C1QTNF6)	5.3636	8.09373	9.57102	19.3301		ENSG00000116704(SLC35D1)	7.85838	4.46771
ENSG00000100625(SIX4)	12.6533	14.267		ENSG00000133477(FAM83F)	4.84937	10.3364	0.00421864	0.199571		ENSG00000116711(PLA2G4A)	27.0318	10.256
ENSG00000100626(GALNT16)	1.86559	1.26885		ENSG00000133488(SEC14L4)	1.8066	0.783952	2.6779	3.2768		ENSG00000116717(GADD45A)	28.4669	146.36
ENSG00000100629(CEP128)	4.81357	2.98722		ENSG00000133606(MKRN1)	45.9104	15.7886	29.2277	28.9835		ENSG00000116729(WLS)	33.5914	23.7078
ENSG00000100632(ERH)	299.42	341.055		ENSG00000133636(NTS)	0	0	0.889308	4.81756		ENSG00000116731(PRDM2)	2.66028	9.64013
ENSG00000100644(HIF1A)	74.1168	57.7204		ENSG00000133678(TMEM254)	20.1686	6.11011	12.1464	7.84014		ENSG00000116741(RGS2)	126.149	41.5146
ENSG00000100647(SUSD6)	9.99314	12.1712		ENSG00000133687(TMTC1)	0.0628903	0.0139045	2.67814	0.898538		ENSG00000116761(CTH)	41.0979	8.37157
ENSG00000100650(SRSF5)	152.906	145.242		ENSG00000133704(IPO8)	14.1624	3.79783	18.2345	5.75504		ENSG00000116771(AGMAT)	11.1032	3.81917
ENSG00000100664(EIF5)	204.233	179.992		ENSG00000133794(ARNTL)	7.91533	4.36012	4.42842	8.70148		ENSG00000116774(OLFML3)	0	0.089328
ENSG00000100665(SERPINA4)	3.87987	12.7629		ENSG00000133872(SARAF)	99.6037	20.2698	136.077	49.6065		ENSG00000116783(TNNI3K)	8.08652	2.01183
ENSG00000100697(DICER1)	35.2442	29.9698		ENSG00000133874(RNF122)	1.25552	3.71991	0.996305	10.0298		ENSG00000116791(CRYZ)	27.9276	5.21531
ENSG00000100711(ZFYVE21)	77.0423	71.8696		ENSG00000133935(C14orf1)	26.9696	7.57129	11.3047	3.89109		ENSG00000116815(CD58)	34.2354	44.7392
ENSG00000100714(MTHFD1)	144.839	138.877		ENSG00000133962(CATSPERB)	49.8811	18.0394	30.747	37.0173		ENSG00000116830(TTF2)	9.49059	3.98551
ENSG00000100722(ZC3H14)	46.5223	39.413		ENSG00000133985(TTC9)	18.0839	35.4949	10.5963	24.3364		ENSG00000116833(NR5A2)	0.521937	0.83311
ENSG00000100726(TELO2)	34.7738	34.5648		ENSG00000133997(MED6)	12.3164	42.2896	21.3551	47.5378		ENSG00000116852(KIF21B)	1.86636	3.09227
ENSG00000100731(PCNX1)	11.8767	9.83852		ENSG00000134057(CCNB1)	81.3245	24.079	119.558	10.6799		ENSG00000116857(TMEM9)	68.5221	37.8354
ENSG00000100739(BDKRB1)	1.61702	2.78072		ENSG00000134070(IRAK2)	0.16561	0.0673136	11.1784	20.7925		ENSG00000116885(OSCP1)	2.85013	2.42608
ENSG00000100744(GSKIP)	29.5343	28.6483		ENSG00000134109(EDEM1)	7.78537	4.76978	24.0596	11.1982		ENSG00000116906(GNPAT)	20.082	11.2544
ENSG00000100749(VRK1)	29.7089	20.7706		ENSG00000134121(CHL1)	0	0	6.68897	1.37217		ENSG00000116918(TSNAX)	21.9437	13.6609
ENSG00000100764(PSMC1)	123.744	118.891		ENSG00000134202(GSTM3)	43.4906	47.1203	1.22769	9.62039		ENSG00000116962(NID1)	0.00806367	0
ENSG00000100767(PAPLN)	0.635331	0.454859		ENSG00000134222(PSRC1)	28.005	8.02849	10.4398	3.96974		ENSG00000116983(HPCAL4)	0.040955	0.0216875
ENSG00000100784(RPS6KA5)	5.09051	3.34843		ENSG00000134243(SORT1)	84.0132	43.2803	6.83611	4.17076		ENSG00000116991(SIPA1L2)	7.74302	7.68194
ENSG00000100796(PPP4R3A)	70.4969	71.0734		ENSG00000134245(WNT2B)	0.830638	1.08253	0.197933	1.98153		ENSG00000117009(KMO)	0.217677	0.491434
ENSG00000100802(C14orf93)	6.7665	7.38559		ENSG00000134255(CEPT1)	43.0199	15.1576	11.2679	10.2587		ENSG00000117016(RIMS3)	0.426307	0.467628
ENSG00000100804(PSMB5)	236.804	297.297		ENSG00000134258(VTCN1)	210.706	17.2986	0.388875	0.426769		ENSG00000117036(ETV3)	16.8939	11.2565
ENSG00000100811(YY1)	52.916	31.6676		ENSG00000134278(SPIRE1)	16.3857	9.25993	8.72574	5.98597		ENSG00000117054(ACADM)	28.4139	7.87018
ENSG00000100813(ACIN1)	55.3301	61.6579		ENSG00000134317(GRHL1)	37.6251	24.0436	3.01103	1.04669		ENSG00000117069(ST6GALNAC5)	0	0
ENSG00000100814(CCNB1IP1)	26.7379	27.9408		ENSG00000134318(ROCK2)	18.0853	9.29923	18.567	7.40134		ENSG00000117115(PADI2)	0.068698	0.224857
ENSG00000100823(APEX1)	129.213	153.471		ENSG00000134321(RSAD2)	0.587099	1.05037	14.1713	10.2729		ENSG00000117139(KDM5B)	12.7887	6.76234
ENSG00000100836(PABPN1)	152.35	174.081		ENSG00000134323(MYCN)	4.47804	0.708967	0	0.238975		ENSG00000117143(UAP1)	56.8446	27.1707
ENSG00000100852(ARHGAP5)	23.6702	16.0958		ENSG00000134324(LPIN1)	24.3443	16.8118	5.64219	7.10745		ENSG00000117148(ACTL8)	0.84666	1.12293
ENSG00000100865(CINP)	45.5768	46.7712		ENSG00000134330(IAH1)	20.8203	6.50406	25.0936	12.3109		ENSG00000117151(CTBS)	7.87095	2.22804
ENSG00000100867(DHRS2)	113.81	251.978		ENSG00000134339(SAA2)	15.9176	102.807	15.0097	101.119		ENSG00000117155(SSX2IP)	12.2811	10.1549
ENSG00000100883(SRP54)	61.5728	45.3418		ENSG00000134352(IL6ST)	19.5685	7.32054	46.7648	19.3119		ENSG00000117226(GBP3)	4.07191	2.94444
ENSG00000100888(CHD8)	28.9877	34.419		ENSG00000134363(FST)	0.0515088	0.307738	13.6792	25.6322		ENSG00000117228(GBP1)	0.275876	3.17244
ENSG00000100889(PCK2)	47.2521	76.4784		ENSG00000134369(NAV1)	12.0239	16.8558	4.92088	6.59614		ENSG00000117245(KIF17)	0.0316567	0.197201
ENSG00000100890(KIAA0391)	45.5185	50.3059		ENSG00000134463(ECHDC3)	2.01342	0.68748	10.9491	1.41296		ENSG00000117266(CDK18)	2.70895	1.5668
ENSG00000100897(DCAF11)	59.2913	38.3778		ENSG00000134470(IL15RA)	4.04391	5.53546	3.49453	16.7792		ENSG00000117280(RAB29)	15.5248	20.5904
ENSG00000100902(PSMA6)	327.332	371.707		ENSG00000134508(CABLES1)	7.68618	4.81189	7.49659	3.8702		ENSG00000117281(CD160)	0.11169	1.53496
ENSG00000100906(NFKBIA)	83.5415	107.935		ENSG00000134531(EMP1)	27.2408	10.3949	4.65408	7.10288		ENSG00000117305(HMGCL)	11.3585	13.7593
ENSG00000100908(EMC9)	48.5496	76.6262		ENSG00000134533(RERG)	39.6547	5.73601	1.4301	2.87086		ENSG00000117308(GALE)	45.6433	42.4928
ENSG00000100911(PSME2)	138.882	161.581		ENSG00000134545(KLRC1)	0	0	8.72132	12.5644		ENSG00000117318(ID3)	198.953	45.6686
ENSG00000100916(BRMS1L)	10.699	9.02076		ENSG00000134548(SPX)	0.0256091	0.0316532	3.65849	5.28743		ENSG00000117335(CD46)	125.903	17.4228
ENSG00000100918(REC8)	3.46237	1.45371		ENSG00000134575(ACP2)	24.8626	7.27528	23.2825	20.7963		ENSG00000117399(CDC20)	70.231	49.883
ENSG00000100926(TM9SF1)	132.673	149.331		ENSG00000134602(STK26)	32.1216	8.66533	3.65092	1.78765		ENSG00000117410(ATP6V0B)	127.486	282.562
ENSG00000100934(SEC23A)	37.3875	43.0462		ENSG00000134627(PIWIL4)	0.236166	0.617294	0.249064	2.57769		ENSG00000117472(TSPAN1)	3.43365	3.2656
ENSG00000100938(GMPR2)	59.428	63.7734		ENSG00000134668(SPOCD1)	0	0.0262711	0.178203	0.840496		ENSG00000117479(SLC19A2)	18.3133	12.6304
ENSG00000100941(PNN)	80.462	76.5677		ENSG00000134690(CDCA8)	28.0896	14.4916	19.7019	1.45977		ENSG00000117481(NSUN4)	11.2109	12.4877
ENSG00000100949(RABGGTA)	21.1057	23.3654		ENSG00000134762(DSC3)	7.93412	2.15636	0.417788	0.278494		ENSG00000117519(CNN3)	0.0947951	0.415865
ENSG00000100968(NFATC4)	1.2661	1.13032		ENSG00000134775(FHOD3)	0.0480543	0.0893314	1.65919	4.89413		ENSG00000117525(F3)	18.1662	49.4835
ENSG00000100982(PCIF1)	16.6046	13.9385		ENSG00000134780(DAGLA)	0.716669	3.78754	2.21319	4.16193		ENSG00000117528(ABCD3)	20.549	9.03118
ENSG00000100983(GSS)	26.8165	39.4128		ENSG00000134802(SLC43A3)	32.8274	90.3001	0.0488545	0.870411		ENSG00000117533(VAMP4)	6.04212	2.96194
ENSG00000100985(MMP9)	0.246547	0.726963		ENSG00000134809(TIMM10)	127.731	95.2012	173.898	45.2829		ENSG00000117593(DARS2)	15.7787	12.2152
ENSG00000100991(TRPC4AP)	20.4285	22.2131		ENSG00000134824(FADS2)	59.8514	140.812	217.361	144.975		ENSG00000117594(HSD11B1)	0	0.0739752
ENSG00000100994(PYGB)	40.5285	54.029		ENSG00000134827(TCN1)	0	0.136248	5.64825	72.3209		ENSG00000117620(SLC35A3)	66.8687	27.5903
ENSG00000100997(ABHD12)	75.1337	105.635		ENSG00000134852(CLOCK)	12.4175	8.14325	4.74623	2.43813		ENSG00000117632(STMN1)	129.205	191.904
ENSG00000101000(PROCR)	0.966157	3.41349		ENSG00000134882(UBAC2)	77.3078	18.3395	30.2956	13.9145		ENSG00000117643(MAN1C1)	0.0344154	0.121694
ENSG00000101003(GINS1)	35.2864	23.716		ENSG00000134905(CARS2)	34.1954	9.17563	26.586	6.88637		ENSG00000117650(NEK2)	36.1902	9.50911
ENSG00000101004(NINL)	4.29106	3.36981		ENSG00000134954(ETS1)	12.6777	13.2276	5.78305	5.58931		ENSG00000117682(DHDDS)	195.982	134.541
ENSG00000101019(UQCC1)	15.6298	17.4052		ENSG00000134955(SLC37A2)	0.656417	2.46934	0.146984	0.918065		ENSG00000117691(NENF)	70.1768	102.518
ENSG00000101040(ZMYND8)	23.7576	24.3596		ENSG00000134970(TMED7)	45.1966	16.1471	90.5383	35.5696		ENSG00000117697(NSL1)	29.1651	16.9898
ENSG00000101052(IFT52)	11.5156	9.68694		ENSG00000134996(OSTF1)	29.19	7.74165	13.0526	7.13342		ENSG00000117707(PROX1)	0	0
ENSG00000101057(MYBL2)	127.274	117.099		ENSG00000135045(C9orf40)	6.83832	10.6591	13.6342	7.29625		ENSG00000117713(ARID1A)	12.2916	10.7261
ENSG00000101079(NDRG3)	11.3813	12.0657		ENSG00000135048(TMEM2)	10.5202	7.97151	39.9496	21.8832		ENSG00000117724(CENPF)	41.0544	30.688
ENSG00000101084(C20orf24)	130.557	147.598		ENSG00000135052(GOLM1)	26.7159	8.5167	86.385	32.5619		ENSG00000117748(RPA2)	28.0374	31.6126
ENSG00000101096(NFATC2)	4.13508	1.89591		ENSG00000135069(PSAT1)	64.0134	52.5423	89.2675	18.1842		ENSG00000117859(OSBPL9)	41.5228	14.2748
ENSG00000101098(RIMS4)	6.54429	3.07479		ENSG00000135070(ISCA1)	19.8738	9.18999	33.8605	12.5493		ENSG00000117868(ESYT2)	39.2086	21.5382
ENSG00000101104(PABPC1L)	13.8341	16.6004		ENSG00000135090(TAOK3)	18.3041	11.9839	7.42156	17.1264		ENSG00000117906(RCN2)	67.1545	25.6045
ENSG00000101109(STK4)	9.06854	10.145		ENSG00000135114(OASL)	0.292218	0.393196	119.626	119.803		ENSG00000117983(MUC5B)	0.0600923	0.0185016
ENSG00000101115(SALL4)	2.97274	3.49808		ENSG00000135124(P2RX4)	10.6592	12.0361	4.98522	39.4685		ENSG00000117984(CTSD)	254.046	620.552
ENSG00000101126(ADNP)	59.9482	54.0549		ENSG00000135127(BICDL1)	11.7204	53.229	6.53502	22.7837		ENSG00000118007(STAG1)	13.6029	14.2309
ENSG00000101132(PFDN4)	235.233	278.714		ENSG00000135205(CCDC146)	1.16493	0.194928	1.2454	1.60545		ENSG00000118096(IFT46)	5.04429	4.53753
ENSG00000101138(CSTF1)	38.0354	36.3411		ENSG00000135245(HILPDA)	26.0858	33.4073	13.9825	233.041		ENSG00000118137(APOA1)	0.0656557	0.0788645
ENSG00000101144(BMP7)	55.1999	67.3356		ENSG00000135249(RINT1)	11.5228	4.10757	11.6892	5.41234		ENSG00000118156(ZNF541)	0	0
ENSG00000101146(RAE1)	81.5191	87.9704		ENSG00000135272(MDFIC)	9.32204	4.28774	18.5966	18.618		ENSG00000118193(KIF14)	16.4675	9.1577
ENSG00000101150(TPD52L2)	184.605	195.199		ENSG00000135299(ANKRD6)	1.56149	2.4876	0.655392	0.888682		ENSG00000118194(TNNT2)	0.037315	0.19102
ENSG00000101158(NELFCD)	177.521	76.0539		ENSG00000135314(KHDC1)	1.40771	11.1453	4.79718	4.31128		ENSG00000118197(DDX59)	26.5294	16.4356
ENSG00000101160(CTSZ)	9.40298	7.64819		ENSG00000135318(NT5E)	10.426	7.4975	20.3987	23.3534		ENSG00000118200(CAMSAP2)	19.1427	13.0585
ENSG00000101161(PRPF6)	75.2294	77.0882		ENSG00000135346(CGA)	0.324646	8.39579	0	3.55009		ENSG00000118257(NRP2)	5.59036	4.63358
ENSG00000101162(TUBB1)	0.410779	0.629832		ENSG00000135363(LMO2)	2.34926	1.55891	0.306095	2.9621		ENSG00000118263(KLF7)	5.69812	4.95468
ENSG00000101166(PRELID3B)	173.827	188.86		ENSG00000135373(EHF)	115.49	46.3408	26.8814	22.7215		ENSG00000118276(B4GALT6)	0.983045	0.847372
ENSG00000101181(MTG2)	16.6271	25.7713		ENSG00000135378(PRRG4)	13.0471	31.5629	1.03826	3.4444		ENSG00000118322(ATP10B)	0	0
ENSG00000101182(PSMA7)	551.963	660.895		ENSG00000135387(CAPRIN1)	222.629	89.5253	92.717	34.1488		ENSG00000118369(USP35)	4.12934	5.9145
ENSG00000101187(SLCO4A1)	20.2911	18.9318		ENSG00000135406(PRPH)	0.0172139	0.018518	0.303433	2.7914		ENSG00000118402(ELOVL4)	0	0
ENSG00000101188(NTSR1)	0.503862	0.678882		ENSG00000135407(AVIL)	0.228896	0.125424	0.038813	0.297784		ENSG00000118432(CNR1)	0.0488652	0
ENSG00000101189(MRGBP)	25.6436	32.8718		ENSG00000135436(FAM186B)	0.1876	0.875919	0.268317	0.315155		ENSG00000118503(TNFAIP3)	32.3177	35.6318
ENSG00000101190(TCFL5)	33.5989	26.5586		ENSG00000135437(RDH5)	49.5496	77.3004	86.6201	94.4777		ENSG00000118507(AKAP7)	4.52859	0.761175
ENSG00000101191(DIDO1)	37.0097	28.964		ENSG00000135439(AGAP2)	0.126988	0.0342487	0.139685	1.17383		ENSG00000118513(MYB)	2.02243	3.33582
ENSG00000101193(GID8)	65.1565	58.2335		ENSG00000135443(KRT85)	96.3847	157.688	1994.44	1420.56		ENSG00000118515(SGK1)	75.4852	51.8733
ENSG00000101199(ARFGAP1)	49.5146	54.0132		ENSG00000135451(TROAP)	16.4645	12.6132	33.5397	13.8238		ENSG00000118523(CTGF)	8.04978	2.50544
ENSG00000101210(EEF1A2)	851.749	1194.45		ENSG00000135452(TSPAN31)	6.88647	0.868464	9.94196	10.9857		ENSG00000118600(TMEM5)	11.7695	5.45631
ENSG00000101213(PTK6)	5.86472	6.28568		ENSG00000135454(B4GALNT1)	0	0.705615	33.1054	21.7406		ENSG00000118620(ZNF430)	0.873078	1.3442
ENSG00000101216(GMEB2)	12.3546	9.75327		ENSG00000135476(ESPL1)	7.2523	5.3112	14.4719	1.66714		ENSG00000118762(PKD2)	8.50595	4.62568
ENSG00000101220(C20orf27)	116.24	136.634		ENSG00000135519(KCNH3)	0.224651	1.1696	1.25526	2.46299		ENSG00000118785(SPP1)	0.0931453	0.185546
ENSG00000101222(SPEF1)	0.376004	0.670896		ENSG00000135535(CD164)	250.598	106.8	75.8211	44.0273		ENSG00000118849(RARRES1)	1.75664	0.55899
ENSG00000101224(CDC25B)	135.637	111.252		ENSG00000135547(HEY2)	0.0897857	0.8178	0.151621	0.576878		ENSG00000118855(MFSD1)	34.3606	15.8105
ENSG00000101236(RNF24)	7.98887	9.92936		ENSG00000135604(STX11)	0	0.0339975	0.966662	6.25746		ENSG00000118898(PPL)	8.31615	8.73997
ENSG00000101246(ARFRP1)	32.0238	49.4354		ENSG00000135617(PRADC1)	15.5785	20.2306	29.5792	20.7865		ENSG00000118960(HS1BP3)	7.43918	29.999
ENSG00000101247(NDUFAF5)	9.35098	14.1484		ENSG00000135622(SEMA4F)	4.41396	1.16536	5.13573	1.63805		ENSG00000118961(LDAH)	7.45082	1.92028
ENSG00000101255(TRIB3)	48.5165	54.2314		ENSG00000135632(SMYD5)	6.04777	10.7047	25.5909	17.1622		ENSG00000118971(CCND2)	0.0170463	0.0681727
ENSG00000101266(CSNK2A1)	45.456	41.3851		ENSG00000135643(KCNMB4)	0.381347	0.116302	0.175145	3.21402		ENSG00000118985(ELL2)	49.3342	10.1814
ENSG00000101276(SLC52A3)	1.42218	2.65129		ENSG00000135677(GNS)	19.1361	4.86151	47.6742	22.109		ENSG00000119042(SATB2)	3.64119	3.12493
ENSG00000101280(ANGPT4)	0.105399	0.364153		ENSG00000135678(CPM)	12.0939	42.2567	12.8371	680.479		ENSG00000119121(TRPM6)	0.00971479	0
ENSG00000101290(CDS2)	11.5308	17.7304		ENSG00000135679(MDM2)	15.8344	14.652	14.4588	42.6173		ENSG00000119125(GDA)	47.5513	21.537
ENSG00000101294(HM13)	137.553	237.794		ENSG00000135697(BCO1)	3.9737	2.24347	1.89836	2.48345		ENSG00000119138(KLF9)	15.2828	3.09898
ENSG00000101306(MYLK2)	0.330928	0.114413		ENSG00000135698(MPHOSPH6)	91.7883	36.5746	29.1832	8.56103		ENSG00000119227(PIGZ)	1.51927	2.58122
ENSG00000101310(SEC23B)	154.764	194.899		ENSG00000135709(KIAA0513)	1.73842	3.64721	1.65879	1.87286		ENSG00000119280(C1orf198)	7.93526	8.1182
ENSG00000101311(FERMT1)	0.366868	0.0335997		ENSG00000135736(CCDC102A)	3.54597	5.05172	4.48359	3.61854		ENSG00000119283(TRIM67)	0	0
ENSG00000101331(CCM2L)	1.20242	0.995286		ENSG00000135740(SLC9A5)	0.805739	0.895989	0.576015	1.94598		ENSG00000119314(PTBP3)	36.376	16.4572
ENSG00000101333(PLCB4)	6.11248	5.39741		ENSG00000135744(AGT)	0.141296	0.124569	0.157184	0.871478		ENSG00000119326(CTNNAL1)	50.1037	25.0403
ENSG00000101337(TM9SF4)	20.9133	24.7169		ENSG00000135766(EGLN1)	14.3845	4.84469	43.134	25.0378		ENSG00000119396(RAB14)	34.1912	13.4317
ENSG00000101343(CRNKL1)	16.38	16.7685		ENSG00000135775(COG2)	10.4082	3.4421	12.7598	6.04151		ENSG00000119403(PHF19)	48.4021	99.6783
ENSG00000101346(POFUT1)	12.5218	9.99761		ENSG00000135776(ABCB10)	13.4421	8.3913	20.7342	4.65354		ENSG00000119408(NEK6)	5.25512	7.96103
ENSG00000101347(SAMHD1)	20.2194	16.6375		ENSG00000135828(RNASEL)	2.30886	0.688642	2.20633	1.6294		ENSG00000119446(RBM18)	7.67346	6.28776
ENSG00000101350(KIF3B)	12.3012	11.3056		ENSG00000135835(KIAA1614)	1.67395	1.09298	0.834519	1.78444		ENSG00000119508(NR4A3)	6.79556	2.0123
ENSG00000101361(NOP56)	76.89	90.1632		ENSG00000135842(FAM129A)	7.17536	30.1097	0.592626	0.372538		ENSG00000119514(GALNT12)	7.00634	2.3687
ENSG00000101363(MANBAL)	18.5851	18.072		ENSG00000135845(PIGC)	21.532	52.9336	22.8627	85.6488		ENSG00000119535(CSF3R)	0.0341205	0
ENSG00000101365(IDH3B)	50.4356	57.9647		ENSG00000135870(RC3H1)	3.7783	1943.51	5.88996	12958.3		ENSG00000119547(ONECUT2)	13.7553	15.3339
ENSG00000101367(MAPRE1)	69.7614	60.0045		ENSG00000135898(GPR55)	0.511043	0.212015	0	0.0267159		ENSG00000119559(C19orf25)	9.31092	26.6533
ENSG00000101384(JAG1)	2.37181	2.07418		ENSG00000135899(SP110)	2.48596	6.3858	2.40819	9.99697		ENSG00000119599(DCAF4)	2.55453	1.05083
ENSG00000101391(CDK5RAP1)	13.5472	13.2932		ENSG00000135905(DOCK10)	0.00558049	0.116316	5.28554	5.6296		ENSG00000119616(FCF1)	28.8233	11.8595
ENSG00000101400(SNTA1)	4.26476	2.8733		ENSG00000135917(SLC19A3)	0.145183	0.401527	1.17837	4.46714		ENSG00000119630(PGF)	0.509309	1.17519
ENSG00000101407(TTI1)	15.5337	12.4071		ENSG00000135919(SERPINE2)	1.04735	3.78587	101.009	97.3669		ENSG00000119640(ACYP1)	13.4674	26.709
ENSG00000101412(E2F1)	24.6976	14.8541		ENSG00000135925(WNT10A)	3.69967	3.03117	0	0		ENSG00000119661(DNAL1)	7.31299	15.976
ENSG00000101413(RPRD1B)	19.4449	16.5655		ENSG00000135926(TMBIM1)	67.0743	69.0776	30.1721	88.5853		ENSG00000119669(IRF2BPL)	42.4339	3.84494
ENSG00000101417(PXMP4)	8.32444	8.1548		ENSG00000135932(CAB39)	33.5408	11.9149	23.1627	17.4741		ENSG00000119699(TGFB3)	1.50769	4.26163
ENSG00000101421(CHMP4B)	56.1284	69.4529		ENSG00000135960(EDAR)	1.43014	0.114257	0.133497	0.795516		ENSG00000119705(SLIRP)	191.323	377.886
ENSG00000101439(CST3)	256.729	276.139		ENSG00000135974(C2orf49)	14.6834	32.8923	6.4247	18.9752		ENSG00000119711(ALDH6A1)	5.88662	0.415432
ENSG00000101442(ACTR5)	6.05308	5.11455		ENSG00000135999(EPC2)	10.3153	18.4989	5.40707	2.04191		ENSG00000119714(GPR68)	0.0486455	0.0771283
ENSG00000101443(WFDC2)	6.07051	4.53369		ENSG00000136002(ARHGEF4)	3.65582	5.00386	2.6398	8.5709		ENSG00000119771(KLHL29)	2.31561	2.30128
ENSG00000101444(AHCY)	89.6048	90.4414		ENSG00000136021(SCYL2)	30.5828	10.6833	20.1309	9.3157		ENSG00000119782(FKBP1B)	0.116026	0
ENSG00000101447(FAM83D)	23.7961	18.0807		ENSG00000136051(WASHC4)	15.2914	10.702	30.129	11.0591		ENSG00000119801(YPEL5)	31.189	12.5854
ENSG00000101452(DHX35)	3.02825	3.68376		ENSG00000136052(SLC41A2)	5.91988	2.33767	14.2721	12.6964		ENSG00000119866(BCL11A)	0	0
ENSG00000101457(DNTTIP1)	17.7325	16.3293		ENSG00000136099(PCDH8)	0.183423	0.550678	0	0		ENSG00000119878(CRIPT)	12.9929	4.90188
ENSG00000101464(PIGU)	25.6126	29.9556		ENSG00000136108(CKAP2)	35.8141	24.3403	30.2453	8.79034		ENSG00000119900(OGFRL1)	20.5472	16.9608
ENSG00000101473(ACOT8)	9.57114	16.3969		ENSG00000136122(BORA)	6.07868	4.40021	4.04265	2.82205		ENSG00000119906(SLF2)	9.2632	11.3031
ENSG00000101474(APMAP)	72.8575	100.809		ENSG00000136147(PHF11)	15.4165	32.5125	4.23677	17.0051		ENSG00000119912(IDE)	16.0231	11.5736
ENSG00000101493(ZNF516)	3.34191	4.18162		ENSG00000136155(SCEL)	0.260123	0.417521	2.8002	1.52768		ENSG00000119915(ELOVL3)	0.94829	4.30728
ENSG00000101544(ADNP2)	9.64135	8.79543		ENSG00000136159(NUDT15)	11.256	8.94177	30.1672	7.5956		ENSG00000119917(IFIT3)	210.763	882.901
ENSG00000101546(RBFA)	14.1274	15.826		ENSG00000136161(RCBTB2)	0.0922466	0.261236	0.913139	0.0353644		ENSG00000119922(IFIT2)	270.137	167.763
ENSG00000101557(USP14)	80.5794	63.6704		ENSG00000136167(LCP1)	0.580308	0.733284	0.105441	0.870907		ENSG00000119927(GPAM)	3.72784	3.53187
ENSG00000101558(VAPA)	43.3652	19.1642		ENSG00000136193(SCRN1)	33.9243	10.5145	27.2024	10.3037		ENSG00000119938(PPP1R3C)	21.0964	6.25464
ENSG00000101574(METTL4)	6.31014	3.57982		ENSG00000136205(TNS3)	33.1215	12.8779	79.3185	36.0632		ENSG00000119943(PYROXD2)	3.27378	1.77012
ENSG00000101577(LPIN2)	8.03273	4.97863		ENSG00000136235(GPNMB)	8.68487	129.831	0.933973	0.326666		ENSG00000119950(MXI1)	20.9192	1.81991
ENSG00000101596(SMCHD1)	10.0851	6.03851		ENSG00000136237(RAPGEF5)	5.28792	6.46958	0.0851311	0.154686		ENSG00000119977(TCTN3)	18.4811	4.14429
ENSG00000101605(MYOM1)	0.344065	0.552802		ENSG00000136240(KDELR2)	202.533	91.6573	156.059	79.4624		ENSG00000119979(FAM45A)	13.3825	5.11827
ENSG00000101608(MYL12A)	169.607	204.364		ENSG00000136244(IL6)	0	0.0782109	4.61882	13.9444		ENSG00000119986(AVPI1)	120.861	122.554
ENSG00000101624(CEP76)	3.46257	3.65938		ENSG00000136261(BZW2)	88.3112	37.3482	53.0038	19.0242		ENSG00000120053(GOT1)	36.0741	60.2512
ENSG00000101639(CEP192)	6.88911	6.41086		ENSG00000136274(NACAD)	0	0.0371615	0	0.111796		ENSG00000120093(HOXB3)	6.89119	4.96673
ENSG00000101654(RNMT)	8.88638	5.3738		ENSG00000136286(MYO1G)	0.117646	0.0952314	0.155593	0.0996434		ENSG00000120129(DUSP1)	274.747	119.742
ENSG00000101665(SMAD7)	11.7098	7.83506		ENSG00000136295(TTYH3)	67.1007	28.0367	22.6623	19.9772		ENSG00000120137(PANK3)	15.1933	14.4835
ENSG00000101695(RNF125)	0.479252	0.601188		ENSG00000136319(TTC5)	3.59425	1.80231	5.85237	3.37902		ENSG00000120149(MSX2)	0.0449532	0
ENSG00000101745(ANKRD12)	9.51812	9.67836		ENSG00000136327(NKX2-8)	0.428579	0.105913	1.72224	10.4048		ENSG00000120159(CAAP1)	21.2486	7.2511
ENSG00000101751(POLI)	9.20938	8.08634		ENSG00000136378(ADAMTS7)	0.820075	0.205904	1.53238	7.0641		ENSG00000120160(EQTN)	9.47923	8.16374
ENSG00000101752(MIB1)	15.6443	18.7769		ENSG00000136379(ABHD17C)	13.0194	10.6763	34.1339	155.243		ENSG00000120217(CD274)	1.35267	3.20903
ENSG00000101773(RBBP8)	12.4505	6.98852		ENSG00000136383(ALPK3)	4.20016	3.19889	0.106055	0.223457		ENSG00000120254(MTHFD1L)	40.407	36.6478
ENSG00000101782(RIOK3)	12.2583	14.4		ENSG00000136425(CIB2)	0.341625	2.39523	8.64097	17.7985		ENSG00000120256(LRP11)	94.5997	21.2313
ENSG00000101811(CSTF2)	24.8067	19.0392		ENSG00000136444(RSAD1)	7.41793	12.067	24.178	22.2382		ENSG00000120278(PLEKHG1)	0.0568284	0.134009
ENSG00000101843(PSMD10)	53.4515	39.6134		ENSG00000136492(BRIP1)	4.98944	7.15872	6.57613	1.92003		ENSG00000120306(CYSTM1)	64.2469	135.13
ENSG00000101844(ATG4A)	7.98089	11.4862		ENSG00000136514(RTP4)	0.173897	0.16651	0.49126	7.44251		ENSG00000120318(ARAP3)	2.77321	5.37911
ENSG00000101846(STS)	2.38538	3.6534		ENSG00000136518(ACTL6A)	40.7705	22.8676	35.2591	12.7927		ENSG00000120334(CENPL)	12.2994	9.8806
ENSG00000101849(TBL1X)	31.117	22.3354		ENSG00000136574(GATA4)	0	0	0.646359	3.53223		ENSG00000120341(SEC16B)	0.0205719	0.182846
ENSG00000101850(GPR143)	1.89119	2.93894		ENSG00000136630(HLX)	0.234178	1.27907	1.67954	6.53181		ENSG00000120437(ACAT2)	38.3958	91.2112
ENSG00000101856(PGRMC1)	122.935	96.7083		ENSG00000136689(IL1RN)	2.01778	7.46385	0.436869	0.740272		ENSG00000120539(MASTL)	31.6497	36.1128
ENSG00000101868(POLA1)	9.9017	5.23619		ENSG00000136710(CCDC115)	18.2516	2.85118	7.44439	2.91771		ENSG00000120594(PLXDC2)	0.609308	2.0095
ENSG00000101871(MID1)	0.428405	0.0394256		ENSG00000136717(BIN1)	1.40721	7.36938	22.4107	19.3778		ENSG00000120645(IQSEC3)	0.00963525	0.0163638
ENSG00000101882(NKAP)	5.12045	5.22727		ENSG00000136811(ODF2)	15.6619	14.888	11.0586	6.0037		ENSG00000120647(CCDC77)	18.6637	18.1161
ENSG00000101888(NXT2)	11.0879	4.42496		ENSG00000136824(SMC2)	16.0992	8.87954	35.7832	4.32766		ENSG00000120669(SOHLH2)	2.57799	2.15015
ENSG00000101901(ALG13)	20.0434	31.9055		ENSG00000136826(KLF4)	0.785208	6.31814	24.6827	32.6758		ENSG00000120686(UFM1)	21.242	19.9872
ENSG00000101911(PRPS2)	26.8225	12.434		ENSG00000136827(TOR1A)	18.7744	9.29379	29.0996	9.71255		ENSG00000120688(WBP4)	5.19216	6.35297
ENSG00000101928(MOSPD1)	9.89652	11.9004		ENSG00000136842(TMOD1)	4.46442	8.99523	0.302311	1.54824		ENSG00000120693(SMAD9)	1.84052	1.55894
ENSG00000101935(AMMECR1)	17.8657	13.018		ENSG00000136856(SLC2A8)	3.65498	3.30297	12.2507	4.04107		ENSG00000120694(HSPH1)	40.7155	19.5822
ENSG00000101940(WDR13)	14.5291	16.0192		ENSG00000136859(ANGPTL2)	0	0	0	0		ENSG00000120696(KBTBD7)	1.9612	1.1435
ENSG00000101945(SUV39H1)	10.5808	9.11846		ENSG00000136861(CDK5RAP2)	10.0555	11.0771	16.0916	8.75548		ENSG00000120705(ETF1)	56.2193	18.1309
ENSG00000101966(XIAP)	25.0141	16.7315		ENSG00000136869(TLR4)	0	0	3.48668	5.82234		ENSG00000120708(TGFBI)	21.8305	42.655
ENSG00000101972(STAG2)	60.6244	43.3058		ENSG00000136883(KIF12)	0	0	2.47964	8.30093		ENSG00000120738(EGR1)	28.9513	0.500386
ENSG00000101974(ATP11C)	13.125	16.5967		ENSG00000136928(GABBR2)	0.262412	1.18458	0.012115	0.0122582		ENSG00000120756(PLS1)	8.97267	3.75085
ENSG00000101986(ABCD1)	17.6605	12.6455		ENSG00000136933(RABEPK)	5.45315	8.06657	20.1722	12.4166		ENSG00000120800(UTP20)	9.12289	8.73081
ENSG00000101997(CCDC22)	20.743	26.6419		ENSG00000136937(NCBP1)	17.3454	9.86551	24.1563	7.61899		ENSG00000120802(TMPO)	91.0843	51.4044
ENSG00000102003(SYP)	0.671634	4.16243		ENSG00000136943(CTSV)	7.12504	2.08093	1.46013	0.248856		ENSG00000120820(GLT8D2)	16.5829	13.872
ENSG00000102007(PLP2)	99.7089	98.8761		ENSG00000136982(DSCC1)	13.6766	7.19148	22.3447	0.777583		ENSG00000120832(MTERF2)	7.0727	12.1171
ENSG00000102030(NAA10)	104.235	133.435		ENSG00000136999(NOV)	0.0422451	0.320508	2.38357	0.539779		ENSG00000120833(SOCS2)	17.1307	2.17128
ENSG00000102034(ELF4)	16.124	15.5055		ENSG00000137033(IL33)	0	0	0.716375	6.84176		ENSG00000120837(NFYB)	14.918	4.90241
ENSG00000102048(ASB9)	1.03185	3.98822		ENSG00000137103(TMEM8B)	3.30511	1.84352	1.50432	6.65115		ENSG00000120875(DUSP4)	28.8136	34.3126
ENSG00000102054(RBBP7)	97.9291	95.3497		ENSG00000137135(ARHGEF39)	5.45272	1.48449	6.81986	1.60609		ENSG00000120889(TNFRSF10B)	47.9909	47.759
ENSG00000102057(KCND1)	0.818593	1.02508		ENSG00000137142(IGFBPL1)	2.74604	4.57721	3.50427	1.45396		ENSG00000120896(SORBS3)	34.0179	79.0943
ENSG00000102078(SLC25A14)	8.20965	7.35716		ENSG00000137161(CNPY3)	34.6699	110.161	22.9342	42.2338		ENSG00000120899(PTK2B)	5.89664	7.79077
ENSG00000102081(FMR1)	25.8508	18.1724		ENSG00000137168(PPIL1)	33.2849	9.80318	34.5491	6.30207		ENSG00000120913(PDLIM2)	67.6062	74.4006
ENSG00000102096(PIM2)	8.38954	7.72338		ENSG00000137177(KIF13A)	13.6167	9.14341	15.24	5.48071		ENSG00000120915(EPHX2)	0	0
ENSG00000102098(SCML2)	2.88531	2.19323		ENSG00000137193(PIM1)	4.1402	18.8783	11.5197	26.6368		ENSG00000120992(LYPLA1)	41.666	8.05823
ENSG00000102100(SLC35A2)	29.1856	41.5078		ENSG00000137198(GMPR)	1.88873	1.63904	0	3.18941		ENSG00000121005(CRISPLD1)	0.14162	0
ENSG00000102103(PQBP1)	51.7696	58.3805		ENSG00000137203(TFAP2A)	42.8108	37.1523	11.9015	11.4327		ENSG00000121039(RDH10)	6.42503	4.90741
ENSG00000102109(PCSK1N)	58.8358	59.2501		ENSG00000137210(TMEM14B)	115.175	137.992	119.401	33.6501		ENSG00000121064(SCPEP1)	24.8802	35.2509
ENSG00000102119(EMD)	93.7675	99.9695		ENSG00000137216(TMEM63B)	29.2441	50.3561	10.4169	37.407		ENSG00000121075(TBX4)	0.0141561	0.1023
[truncated: 10,485 more rows]
