# Supplementary material for: Roquin1 inhibits the proliferation of breast cancer cells by inducing G1/S cell cycle arrest via selectively destabilizing the mRNAs of cell cycle–promoting genes
Source: J Exp Clin Cancer Res. 2020 Nov 23;39:255. doi: 10.1186/s13046-020-01766-w (PMC7686734; doi:10.1186/s13046-020-01766-w)
Supplement: Supplementary file 4 — Additional file 4. [file 13046_2020_1766_MOESM4_ESM.xlsx]

## Sheet: Roquin1 in BRCA
Patient	Days	Status	Expression	Group
TCGA-A7-A56D	448	Alive	199.6	Low
TCGA-AC-A2QJ	446	Dead	224.9	Low
TCGA-E2-A572	1208	Alive	248.91	Low
TCGA-LL-A5YM	466	Alive	265.44	Low
TCGA-AC-A62V	348	Dead	281.64	Low
TCGA-V7-A7HQ	2033	Alive	284.52	Low
TCGA-LL-A7SZ	594	Alive	305.23	Low
TCGA-OL-A6VR	1220	Alive	308.49	Low
TCGA-OL-A66N	792	Alive	316.79	Low
TCGA-OL-A66O	528	Alive	321.26	Low
TCGA-AC-A3QQ	734	Alive	323.19	Low
TCGA-LL-A6FQ	80	Alive	329.25	Low
TCGA-OL-A66P	428	Alive	338.85	Low
TCGA-S3-AA12	574	Alive	340.52	Low
TCGA-A2-A3XW	1712	Alive	341.25	Low
TCGA-E9-A3X8	926	Alive	346.05	Low
TCGA-AC-A7VC	1	Alive	347.16	Low
TCGA-BH-A0B4	1191	Alive	347.26	Low
TCGA-A2-A3XV	996	Alive	353.12	Low
TCGA-A7-A6VW	285	Alive	367.09	Low
TCGA-AO-A0JM	2184	Alive	369.83	Low
TCGA-AC-A5EH	511	Alive	375.67	Low
TCGA-BH-A18J	612	Dead	379.52	Low
TCGA-A2-A4S1	820	Alive	387.14	Low
TCGA-EW-A1PB	608	Alive	395.01	Low
TCGA-BH-A0DZ	495	Alive	395.76	Low
TCGA-LL-A9Q3	532	Alive	396.82	Low
TCGA-OL-A5RW	1106	Alive	399.8	Low
TCGA-OL-A5D7	1780	Alive	399.95	Low
TCGA-E2-A9RU	538	Alive	400.34	Low
TCGA-D8-A1Y3	430	Alive	405.84	Low
TCGA-BH-A0DK	423	Alive	406.84	Low
TCGA-E2-A14P	1246	Alive	407.69	Low
TCGA-BH-A5J0	715	Alive	410.1	Low
TCGA-EW-A3E8	1035	Alive	417.83	Low
TCGA-A7-A6VV	313	Alive	419.38	Low
TCGA-BH-A2L8	612	Alive	426.43	Low
TCGA-AR-A0TW	3009	Alive	427.62	Low
TCGA-AC-A3TM	762	Alive	429.03	Low
TCGA-BH-A0BZ	2255	Alive	431.43	Low
TCGA-E9-A6HE	847	Alive	432.13	Low
TCGA-OL-A66L	1301	Alive	433.57	Low
TCGA-BH-A0DI	912	Alive	434.46	Low
TCGA-AR-A2LJ	2632	Alive	434.5	Low
TCGA-E2-A1LL	1309	Alive	435.3	Low
TCGA-AN-A03X	10	Alive	444.59	Low
TCGA-AO-A0J6	1140	Alive	447.05	Low
TCGA-AO-A0J2	997	Alive	450.21	Low
TCGA-AR-A1AQ	3021	Alive	451.96	Low
TCGA-E2-A2P5	821	Dead	453.6	Low
TCGA-EW-A1OZ	1229	Alive	453.83	Low
TCGA-AC-A3QP	675	Alive	455.1	Low
TCGA-BH-A0AY	777	Alive	455.89	Low
TCGA-LL-A8F5	596	Alive	456.98	Low
TCGA-A2-A3XU	912	Dead	460.64	Low
TCGA-OL-A5RY	752	Alive	462.28	Low
TCGA-AN-A0FD	196	Alive	462.84	Low
TCGA-OL-A5S0	620	Alive	463.31	Low
TCGA-4H-AAAK	348	Alive	464.68	Low
TCGA-BH-A0B6	2483	Alive	465.09	Low
TCGA-BH-A0HB	806	Alive	465.33	Low
TCGA-BH-A0BQ	2255	Alive	465.72	Low
TCGA-E2-A574	1179	Alive	466.89	Low
TCGA-AO-A126	3307	Alive	466.94	Low
TCGA-BH-A0DH	1156	Alive	468.95	Low
TCGA-Z7-A8R6	3256	Alive	472.55	Low
TCGA-AC-A2QH	1005	Alive	478.98	Low
TCGA-E9-A1NG	786	Dead	478.99	Low
TCGA-AO-A03M	1866	Alive	479.22	Low
TCGA-AC-A6IW	413	Alive	479.99	Low
TCGA-BH-A0DV	2064	Alive	480.02	Low
TCGA-S3-AA10	586	Alive	483.2	Low
TCGA-A2-A0D2	1027	Alive	485.31	Low
TCGA-D8-A143	431	Alive	485.35	Low
TCGA-BH-A0H7	702	Alive	487.52	Low
TCGA-D8-A1Y2	433	Alive	488.26	Low
TCGA-B6-A0I6	991	Dead	489.02	Low
TCGA-C8-A12U	385	Alive	493.94	Low
TCGA-A2-A0CS	2348	Dead	495.15	Low
TCGA-EW-A6SA	510	Alive	495.69	Low
TCGA-LD-A66U	646	Alive	496.25	Low
TCGA-C8-A1HG	345	Alive	499.27	Low
TCGA-BH-A0BR	2330	Alive	502.15	Low
TCGA-D8-A27R	307	Alive	504.93	Low
TCGA-LL-A7T0	376	Alive	507.53	Low
TCGA-AQ-A54N	78	Alive	507.9	Low
TCGA-E9-A3QA	918	Alive	508.1	Low
TCGA-A2-A0CR	3283	Alive	509.64	Low
TCGA-AC-A8OR	40	Alive	509.88	Low
TCGA-A2-A3XY	1093	Dead	510.48	Low
TCGA-BH-A0HL	72	Alive	513.66	Low
TCGA-AC-A3BB	987	Alive	514.7	Low
TCGA-A2-A04U	2654	Alive	514.87	Low
TCGA-C8-A12W	385	Alive	515.32	Low
TCGA-LD-A9QF	323	Alive	517.87	Low
TCGA-A2-A25D	552	Alive	518.66	Low
TCGA-A2-A0EO	2442	Alive	519.73	Low
TCGA-LL-A740	441	Alive	519.98	Low
TCGA-A7-A13F	765	Alive	520.88	Low
TCGA-A2-A0D0	2048	Alive	522.24	Low
TCGA-OL-A5D8	973	Alive	523.99	Low
TCGA-OL-A5D6	1104	Dead	525.37	Low
TCGA-GM-A3XL	2108	Alive	525.44	Low
TCGA-GM-A2DB	2406	Alive	526.47	Low
TCGA-LL-A6FR	489	Alive	527.48	Low
TCGA-OL-A5RZ	679	Alive	527.88	Low
TCGA-UU-A93S	116	Dead	530.39	Low
TCGA-AO-A0JE	2335	Alive	531.44	Low
TCGA-E2-A14O	1359	Alive	534.27	Low
TCGA-A7-A3RF	408	Alive	535.42	Low
TCGA-AN-A049	19	Alive	535.7	Low
TCGA-AO-A03R	2091	Alive	537.47	Low
TCGA-BH-A42T	320	Dead	537.65	Low
TCGA-BH-A18F	1001	Alive	538.25	Low
TCGA-BH-A0HA	1611	Alive	540.42	Low
TCGA-BH-A0B8	1569	Alive	541.36	Low
TCGA-AQ-A1H2	475	Alive	541.9	Low
TCGA-BH-A0C1	1411	Dead	542.74	Low
TCGA-EW-A424	715	Alive	543.35	Low
TCGA-B6-A0WZ	6292	Alive	545.11	Low
TCGA-BH-A0BC	974	Alive	545.29	Low
TCGA-E2-A1II	1025	Alive	545.88	Low
TCGA-A2-A0T2	255	Dead	546.14	Low
TCGA-A2-A0SU	1662	Alive	550.15	Low
TCGA-E9-A22D	1248	Alive	550.4	Low
TCGA-C8-A1HF	332	Alive	550.64	Low
TCGA-GI-A2C9	3342	Alive	551.01	Low
TCGA-S3-AA15	525	Alive	551.03	Low
TCGA-LL-A50Y	762	Alive	551.51	Low
TCGA-C8-A8HP	396	Alive	552.94	Low
TCGA-A7-A6VY	266	Alive	554.48	Low
TCGA-EW-A2FR	1673	Alive	556.99	Low
TCGA-A8-A07Z	1371	Alive	558.62	Low
TCGA-B6-A0RG	2082	Alive	558.96	Low
TCGA-A2-A04R	3709	Alive	559.27	Low
TCGA-BH-A0BJ	660	Alive	559.85	Low
TCGA-A2-A3Y0	1546	Alive	561.16	Low
TCGA-A2-A0SY	1347	Alive	561.67	Low
TCGA-E2-A14R	1174	Alive	562.65	Low
TCGA-A8-A08F	1004	Alive	562.75	Low
TCGA-AC-A3EH	197	Dead	563.23	Low
TCGA-UL-AAZ6	518	Alive	563.3	Low
TCGA-E2-A1IG	2140	Alive	565.16	Low
TCGA-3C-AALK	1448	Alive	566.82	Low
TCGA-EW-A1P8	239	Dead	567.38	Low
TCGA-AR-A0U4	3261	Alive	568.88	Low
TCGA-LL-A6FP	677	Alive	570.23	Low
TCGA-BH-A0W4	759	Alive	570.98	Low
TCGA-BH-A18S	2009	Dead	573.82	Low
TCGA-AN-A04A	90	Alive	575.28	Low
TCGA-E9-A1RG	647	Alive	575.32	Low
TCGA-BH-A42U	3364	Alive	575.88	Low
TCGA-AN-A0AL	227	Alive	576.49	Low
TCGA-LL-A5YN	447	Alive	576.8	Low
TCGA-A2-A0CZ	1616	Alive	580	Low
TCGA-EW-A1OV	789	Alive	580.17	Low
TCGA-PE-A5DC	1430	Dead	580.32	Low
TCGA-AO-A12E	2142	Alive	582.24	Low
TCGA-AC-A3TN	456	Alive	582.3	Low
TCGA-AO-A03L	2442	Alive	585.37	Low
TCGA-A2-A4RY	648	Alive	585.63	Low
TCGA-A2-A4S3	666	Alive	589.56	Low
TCGA-A2-A3KC	1102	Alive	589.74	Low
TCGA-A1-A0SH	1437	Alive	590.12	Low
TCGA-A7-A426	364	Alive	590.13	Low
TCGA-BH-A1EV	365	Dead	591.05	Low
TCGA-AR-A2LH	616	Dead	591.48	Low
TCGA-3C-AALJ	1474	Alive	592.02	Low
TCGA-E2-A576	1043	Alive	592.12	Low
TCGA-A2-A0SV	825	Dead	592.72	Low
TCGA-A2-A0YE	554	Alive	593.16	Low
TCGA-BH-A18V	1556	Dead	594.58	Low
TCGA-EW-A6SB	760	Alive	594.61	Low
TCGA-AC-A7VB	250	Alive	595.55	Low
TCGA-3C-AALI	4005	Alive	597.06	Low
TCGA-Z7-A8R5	3287	Alive	597.92	Low
TCGA-BH-A0AZ	1919	Alive	598.47	Low
TCGA-BH-A0B0	2477	Alive	598.51	Low
TCGA-WT-AB41	1611	Alive	598.58	Low
TCGA-BH-A0HY	1545	Alive	599.26	Low
TCGA-A2-A0T4	624	Alive	600.78	Low
TCGA-A2-A04X	1686	Alive	600.88	Low
TCGA-BH-A0AW	622	Alive	601.58	Low
TCGA-AO-A0JJ	1887	Alive	603.17	Low
TCGA-JL-A3YW	360	Alive	603.75	Low
TCGA-BH-A0E1	477	Alive	603.79	Low
TCGA-AC-A3W5	504	Alive	604.69	Low
TCGA-BH-A0B7	2559	Alive	605.43	Low
TCGA-D8-A1X9	727	Alive	606.05	Low
TCGA-AO-A12B	2989	Alive	606.83	Low
TCGA-BH-A0HF	727	Alive	607.83	Low
TCGA-BH-A0W7	1363	Alive	609.33	Low
TCGA-BH-A0BS	2612	Alive	609.49	Low
TCGA-AO-A0JD	2190	Alive	611.04	Low
TCGA-A2-A0CT	2289	Alive	612.46	Low
TCGA-A2-A0EQ	2426	Alive	613.47	Low
TCGA-A2-A0D1	1051	Alive	613.54	Low
TCGA-A7-A4SE	644	Alive	613.55	Low
TCGA-BH-A6R8	293	Alive	616.13	Low
TCGA-E2-A14T	2311	Alive	617.04	Low
TCGA-A1-A0SF	1463	Alive	617.33	Low
TCGA-PL-A8LY	8	Alive	619.05	Low
TCGA-AR-A0U0	1988	Alive	619.18	Low
TCGA-C8-A130	370	Alive	620.87	Low
TCGA-S3-AA0Z	629	Alive	621.1	Low
TCGA-E2-A153	707	Alive	621.8	Low
TCGA-BH-A0BV	1519	Alive	624.33	Low
TCGA-OL-A5RX	878	Alive	624.91	Low
TCGA-EW-A1PD	424	Alive	625.55	Low
TCGA-XX-A899	467	Alive	626.38	Low
TCGA-C8-A135	393	Alive	627.65	Low
TCGA-BH-A208	1759	Dead	630.13	Low
TCGA-S3-AA17	424	Alive	630.16	Low
TCGA-AO-A03N	2031	Alive	631.95	Low
TCGA-B6-A400	215	Alive	632.41	Low
TCGA-E9-A1N6	678	Dead	632.78	Low
TCGA-B6-A0WY	3461	Dead	632.84	Low
TCGA-A2-A3XT	2770	Alive	634.98	Low
TCGA-AO-A03T	2124	Alive	636.07	Low
TCGA-AR-A1AU	2868	Alive	636.92	Low
TCGA-AN-A0FK	213	Alive	637.57	Low
TCGA-A7-A425	447	Alive	637.6	Low
TCGA-A2-A04P	548	Dead	637.97	Low
TCGA-HN-A2NL	79	Alive	638	Low
TCGA-A2-A4S0	706	Alive	639.1	Low
TCGA-A8-A06P	396	Alive	639.79	Low
TCGA-A2-A3XS	1032	Dead	639.86	Low
TCGA-A7-A0DC	906	Alive	639.87	Low
TCGA-LL-A5YO	440	Alive	639.96	Low
TCGA-GM-A5PX	551	Alive	640.48	Low
TCGA-E9-A5UO	785	Alive	642.75	Low
TCGA-C8-A12P	358	Alive	643.87	Low
TCGA-OL-A66I	714	Alive	644.76	Low
TCGA-D8-A1XL	606	Alive	645.96	Low
TCGA-EW-A6S9	463	Alive	647.04	Low
TCGA-OL-A66H	812	Alive	647.21	Low
TCGA-S3-AA14	529	Alive	648.04	Low
TCGA-D8-A1XK	441	Alive	648.97	Low
TCGA-AO-A0J8	680	Alive	649.59	Low
TCGA-GM-A3XG	1330	Alive	649.61	Low
TCGA-A2-A0EX	752	Alive	649.74	Low
TCGA-BH-A28O	1120	Alive	650.17	Low
TCGA-C8-A26X	376	Alive	650.9	Low
TCGA-PE-A5DE	2645	Alive	651.57	Low
TCGA-C8-A137	379	Alive	652.15	Low
TCGA-AQ-A54O	1001	Alive	653.91	Low
TCGA-LL-A5YL	519	Alive	654.37	Low
TCGA-BH-A5IZ	567	Alive	654.46	Low
TCGA-B6-A0RH	6456	Dead	654.75	Low
TCGA-A2-A1G4	595	Alive	655.29	Low
TCGA-C8-A131	411	Alive	655.92	Low
TCGA-AC-A4ZE	890	Alive	656.41	Low
TCGA-BH-A0HX	829	Alive	656.94	Low
TCGA-AO-A1KR	2513	Alive	657.53	Low
TCGA-E9-A1N8	1039	Alive	657.59	Low
TCGA-BH-A0HW	1561	Alive	657.93	Low
TCGA-B6-A0I2	4361	Alive	657.95	Low
TCGA-BH-A6R9	160	Alive	659.2	Low
TCGA-GM-A2DL	3519	Alive	659.23	Low
TCGA-B6-A0IG	4456	Dead	660.11	Low
TCGA-EW-A1IZ	554	Alive	660.18	Low
TCGA-BH-A0E2	435	Alive	661.7	Low
TCGA-B6-A0IQ	4285	Alive	661.98	Low
TCGA-D8-A1X6	541	Alive	662.8	Low
TCGA-A1-A0SQ	554	Alive	663.24	Low
TCGA-AN-A0AJ	303	Alive	664.22	Low
TCGA-A1-A0SJ	416	Alive	664.29	Low
TCGA-E2-A159	762	Alive	665.77	Low
TCGA-E9-A22E	1269	Alive	666.04	Low
TCGA-AN-A0XO	375	Alive	666.05	Low
TCGA-C8-A12Y	1476	Alive	666.11	Low
TCGA-A8-A09T	579	Alive	667.45	Low
TCGA-A2-A0CK	4159	Alive	668.28	Low
TCGA-A8-A07J	365	Alive	668.43	Low
TCGA-E9-A22A	1189	Alive	668.73	Low
TCGA-E9-A295	375	Alive	668.84	Low
TCGA-S3-A6ZH	641	Alive	669.24	Low
TCGA-B6-A0RO	4929	Alive	669.91	Low
TCGA-A1-A0SN	1196	Alive	669.98	Low
TCGA-AR-A1AT	1272	Dead	670.3	Low
TCGA-AC-A3HN	496	Alive	670.75	Low
TCGA-BH-A0B3	1203	Alive	671.08	Low
TCGA-A7-A3J0	313	Alive	672.09	Low
TCGA-BH-A0HI	620	Alive	672.35	Low
TCGA-A7-A0CJ	931	Alive	673.27	Low
TCGA-BH-A0HP	414	Alive	673.32	Low
TCGA-OL-A5RV	1062	Alive	674.61	Low
TCGA-D8-A1Y1	302	Dead	674.66	Low
TCGA-AN-A0AK	224	Alive	675.06	Low
TCGA-D8-A27W	373	Alive	675.09	Low
TCGA-C8-A12Z	382	Alive	675.11	Low
TCGA-PE-A5DD	1953	Alive	675.45	Low
TCGA-3C-AAAU	4047	Alive	675.53	Low
TCGA-A7-A13D	965	Alive	675.94	Low
TCGA-A1-A0SP	584	Alive	677.49	Low
TCGA-E9-A5FL	24	Alive	678.29	Low
TCGA-A8-A07P	334	Alive	678.3	Low
TCGA-BH-A0DE	2372	Alive	679.11	Low
TCGA-E2-A1LB	2306	Alive	680.22	Low
TCGA-BH-A42V	635	Alive	681.12	Low
TCGA-AN-A0AM	5	Alive	683.41	Low
TCGA-AN-A0FT	214	Alive	684.6	Low
TCGA-A2-A4RX	742	Alive	684.94	Low
TCGA-A8-A082	549	Alive	686.8	Low
TCGA-A2-A25B	1291	Alive	687.02	Low
TCGA-C8-A12L	363	Alive	687.77	Low
TCGA-AO-A1KQ	1882	Alive	687.89	Low
TCGA-D8-A1JM	590	Alive	688.82	Low
TCGA-E2-A10F	878	Alive	690.95	Low
TCGA-AQ-A0Y5	172	Dead	694.03	Low
TCGA-EW-A6SD	1010	Alive	694.25	Low
TCGA-PL-A8LX	5	Alive	694.34	Low
TCGA-A8-A07W	304	Alive	694.68	Low
TCGA-AO-A03O	2483	Dead	695.63	Low
TCGA-E2-A56Z	252	Alive	696.12	Low
TCGA-E2-A1LE	879	Dead	696.94	Low
TCGA-AC-A5XU	455	Alive	697.9	Low
TCGA-EW-A1P7	915	Alive	698.68	Low
TCGA-EW-A1PF	439	Alive	698.81	Low
TCGA-AR-A0TY	1699	Dead	699.13	Low
TCGA-AR-A0TU	709	Alive	699.64	Low
TCGA-EW-A1PC	187	Alive	700.38	Low
TCGA-B6-A0RE	7777	Alive	701.46	Low
TCGA-BH-A18L	811	Dead	701.73	Low
TCGA-OK-A5Q2	64	Alive	703.69	Low
TCGA-E2-A1LA	748	Alive	704.05	Low
TCGA-GM-A5PV	412	Alive	704.72	Low
TCGA-E9-A1NH	576	Alive	705.28	Low
TCGA-BH-A0RX	170	Alive	706.25	Low
TCGA-E2-A109	1417	Alive	707.31	Low
TCGA-GI-A2C8	225	Alive	707.83	Low
TCGA-AN-A0FL	231	Alive	708.89	Low
TCGA-MS-A51U	681	Alive	709.44	Low
TCGA-AC-A8OQ	34	Alive	709.62	Low
TCGA-E2-A14Z	563	Dead	709.87	Low
TCGA-E9-A1R6	339	Alive	710.04	Low
TCGA-E2-A1IK	1800	Alive	710.56	Low
TCGA-AC-A3W6	602	Alive	712.43	Low
TCGA-E2-A14Y	2109	Alive	712.55	Low
TCGA-A8-A0A9	822	Alive	712.65	Low
TCGA-EW-A3U0	532	Alive	712.72	Low
TCGA-AC-A23E	698	Alive	713.24	Low
TCGA-E2-A1L7	1836	Alive	713.33	Low
TCGA-AQ-A04H	754	Alive	713.49	Low
TCGA-E9-A54Y	725	Alive	713.86	Low
TCGA-E9-A228	1285	Alive	714.25	Low
TCGA-B6-A0RI	7126	Alive	714.93	Low
TCGA-AN-A0FV	10	Alive	715.89	Low
TCGA-A2-A4S2	643	Alive	715.99	Low
TCGA-AC-A2FM	792	Dead	716.67	Low
TCGA-LD-A7W5	216	Alive	716.9	Low
TCGA-E2-A15A	710	Alive	717.91	Low
TCGA-BH-A18U	1563	Dead	718.96	Low
TCGA-B6-A0IJ	7106	Alive	719.78	Low
TCGA-BH-A0EI	1926	Alive	719.97	Low
TCGA-E2-A108	837	Alive	720.6	Low
TCGA-AR-A24Q	3172	Alive	721.11	Low
TCGA-GM-A3XN	2019	Alive	721.79	Low
TCGA-EW-A1P4	907	Alive	722.1	Low
TCGA-LL-A73Z	227	Dead	723.14	Low
TCGA-B6-A0IH	3418	Dead	723.39	Low
TCGA-E2-A15T	1563	Alive	723.39	Low
TCGA-BH-A0B5	2136	Alive	723.48	Low
TCGA-A8-A06R	547	Alive	725.04	Low
TCGA-A2-A0CP	2813	Alive	726.54	Low
TCGA-A2-A4RW	222	Alive	727.6	Low
TCGA-EW-A1OX	911	Alive	729.25	Low
TCGA-E2-A107	1047	Alive	730.25	Low
TCGA-BH-A0BF	1324	Dead	730.42	Low
TCGA-D8-A1XQ	499	Alive	731.02	Low
TCGA-E9-A5FK	812	Alive	732.53	Low
TCGA-5L-AAT1	1471	Alive	733.5	Low
TCGA-JL-A3YX	352	Alive	737.07	Low
TCGA-A2-A0T1	521	Alive	738.21	Low
TCGA-A7-A4SD	441	Alive	738.31	Low
TCGA-A1-A0SI	635	Alive	738.96	Low
TCGA-AR-A5QP	1185	Alive	740.58	Low
TCGA-AR-A1AP	2856	Alive	742.24	Low
TCGA-D8-A1JK	612	Alive	742.82	Low
TCGA-AR-A24V	3203	Alive	743.41	Low
TCGA-AR-A1AS	1150	Alive	746.06	Low
TCGA-C8-A26V	616	Alive	746.54	Low
TCGA-BH-A204	2534	Dead	747.25	Low
TCGA-C8-A132	383	Alive	747.49	Low
TCGA-E2-A150	1935	Alive	748.28	Low
TCGA-A7-A2KD	679	Alive	750.25	Low
TCGA-AC-A23G	2248	Alive	750.73	Low
TCGA-EW-A1PA	575	Alive	751.81	Low
TCGA-AR-A24T	3202	Alive	752.07	Low
TCGA-BH-A0B1	1148	Alive	752.24	Low
TCGA-BH-A0HK	178	Alive	752.9	Low
TCGA-OL-A5DA	1783	Alive	753.34	Low
TCGA-EW-A1P3	1611	Alive	758.64	Low
TCGA-LL-A5YP	450	Alive	760.85	Low
TCGA-E2-A1B4	1004	Dead	761.35	Low
TCGA-B6-A40B	3152	Alive	762.13	Low
TCGA-A2-A0YT	723	Dead	762.19	Low
TCGA-LL-A442	889	Alive	763.12	Low
TCGA-AN-A0AR	10	Alive	763.14	Low
TCGA-AO-A0JA	655	Alive	763.28	Low
TCGA-A1-A0SO	852	Alive	764.02	Low
TCGA-EW-A1P5	703	Alive	764.82	Low
TCGA-AQ-A7U7	584	Dead	765.2	Low
TCGA-BH-A1FE	2273	Dead	765.2	Low
TCGA-C8-A12Q	385	Dead	766.03	Low
TCGA-A2-A0SX	1534	Alive	766.22	Low
TCGA-OL-A5RU	1219	Alive	766.31	Low
TCGA-BH-A0C0	1270	Alive	766.56	Low
TCGA-A1-A0SD	437	Alive	766.85	Low
TCGA-OL-A66J	1996	Alive	767.01	Low
TCGA-E2-A152	2128	Alive	767.78	Low
TCGA-A2-A0T6	575	Alive	767.84	Low
TCGA-E2-A1IE	2362	Alive	767.86	Low
TCGA-B6-A0IB	3941	Dead	767.94	Low
TCGA-BH-A1FH	1034	Dead	768.17	Low
TCGA-C8-A12N	358	Alive	768.32	Low
TCGA-C8-A273	513	Alive	768.44	Low
TCGA-AR-A0TQ	2991	Alive	768.47	Low
TCGA-E9-A1RE	1419	Alive	768.96	Low
TCGA-AR-A2LM	1935	Alive	770.3	Low
TCGA-AO-A0JI	1528	Alive	770.92	Low
TCGA-BH-A0DD	2486	Alive	772.41	Low
TCGA-D8-A3Z5	1015	Alive	772.94	Low
TCGA-E2-A1LK	266	Dead	773.55	Low
TCGA-GM-A2DD	2282	Alive	773.83	Low
TCGA-GM-A2DA	6593	Dead	775.24	Low
TCGA-D8-A1XT	506	Alive	776.51	Low
TCGA-D8-A3Z6	563	Alive	776.87	Low
TCGA-C8-A12X	385	Alive	776.98	Low
TCGA-AC-A3YI	707	Alive	777.79	Low
TCGA-AO-A128	3248	Alive	778.02	Low
TCGA-B6-A0RS	3063	Dead	779.67	Low
TCGA-A7-A4SA	454	Alive	780.03	Low
TCGA-A8-A07I	426	Alive	780.07	Low
TCGA-AR-A2LR	1742	Alive	781.2	Low
TCGA-XX-A89A	488	Alive	781.29	Low
TCGA-E9-A22G	1239	Alive	781.47	Low
TCGA-A8-A09E	1492	Alive	782.8	Low
TCGA-HN-A2OB	1900	Dead	783.27	Low
TCGA-A7-A4SF	545	Alive	783.34	Low
TCGA-BH-A0BM	1876	Alive	783.44	Low
TCGA-B6-A0X1	7455	Dead	784.89	Low
TCGA-AO-A12C	2372	Alive	785.18	Low
TCGA-C8-A12O	385	Alive	786.09	Low
TCGA-A2-A0CX	1728	Alive	786.2	Low
TCGA-C8-A12V	385	Alive	786.7	Low
TCGA-BH-A8FZ	574	Alive	786.73	Low
TCGA-A8-A0A7	30	Alive	788.38	Low
TCGA-A2-A0T7	631	Alive	788.62	Low
TCGA-A2-A0SW	1365	Dead	789.27	Low
TCGA-A2-A0EY	1925	Alive	790.34	Low
TCGA-BH-A1FD	1009	Dead	790.89	Low
TCGA-B6-A2IU	5176	Alive	791.52	Low
TCGA-A2-A1FX	1847	Alive	792.09	Low
TCGA-EW-A1J1	575	Alive	792.11	Low
TCGA-AR-A1AO	2618	Alive	792.12	Low
TCGA-AR-A0U3	4080	Alive	792.93	Low
TCGA-E2-A14S	1009	Alive	793.6	Low
TCGA-AO-A0J9	1613	Alive	794.06	Low
TCGA-D8-A27G	409	Alive	795.08	Low
TCGA-AN-A0XS	10	Alive	795.1	Low
TCGA-BH-A18N	1148	Dead	795.13	Low
TCGA-E2-A156	726	Alive	795.41	Low
TCGA-E2-A14U	1318	Alive	796.57	Low
TCGA-AO-A03P	2911	Dead	797.06	Low
TCGA-A2-A04Q	2385	Alive	797.15	Low
TCGA-AN-A0FN	218	Alive	798.37	Low
TCGA-AR-A1AK	3159	Alive	798.73	Low
TCGA-BH-A0EB	745	Alive	799.8	Low
TCGA-AR-A250	2707	Alive	800.22	Low
TCGA-BH-A18M	2207	Dead	800.37	Low
TCGA-E2-A1IU	337	Alive	800.41	Low
TCGA-GM-A3NW	3361	Alive	800.81	Low
TCGA-A2-A0D4	767	Alive	801.67	Low
TCGA-AN-A0FS	210	Alive	801.75	Low
TCGA-A8-A09N	31	Alive	802.53	Low
TCGA-C8-A275	1	Alive	804.65	Low
TCGA-BH-A0H5	1620	Alive	805.32	Low
TCGA-BH-A0AV	1820	Alive	805.57	Low
TCGA-BH-A0AU	1914	Alive	805.96	Low
TCGA-E2-A1B6	867	Alive	806.11	Low
TCGA-E2-A10A	1229	Alive	807.57	Low
TCGA-EW-A423	533	Alive	808.48	Low
TCGA-EW-A1OY	908	Alive	809.3	Low
TCGA-AN-A0FJ	242	Alive	809.72	Low
TCGA-C8-A134	383	Alive	811.31	Low
TCGA-E9-A1R0	860	Alive	811.54	Low
TCGA-BH-A0HN	516	Alive	811.55	Low
TCGA-C8-A26W	381	Alive	812.13	Low
TCGA-B6-A0RN	8008	Alive	812.6	Low
TCGA-AR-A1AV	1864	Alive	813.16	Low
TCGA-BH-A0B9	1572	Alive	813.26	Low
TCGA-AR-A0TX	1972	Alive	814.21	Low
TCGA-A2-A3XZ	1532	Alive	814.61	Low
TCGA-BH-A0E6	293	Alive	814.95	Low
TCGA-A8-A079	274	Alive	816.6	Low
TCGA-E2-A15O	1545	Alive	817.14	Low
TCGA-AR-A0TT	3316	Alive	817.7	Low
TCGA-AC-A3W7	471	Alive	817.8	Low
TCGA-A7-A4SC	446	Alive	818.33	Low
TCGA-A2-A3XX	1439	Dead	819.12	Low
TCGA-A1-A0SM	242	Alive	819.44	Low
TCGA-AO-A1KT	541	Alive	819.6	Low
TCGA-E2-A155	640	Alive	819.7	High
TCGA-BH-A0DX	2156	Alive	821.73	High
TCGA-BH-A0BW	2371	Alive	822.4	High
TCGA-E2-A154	591	Alive	822.56	High
TCGA-E2-A15K	275	Alive	823.27	High
TCGA-C8-A8HR	408	Alive	823.31	High
TCGA-EW-A6SC	952	Alive	825.36	High
TCGA-D8-A142	425	Alive	825.5	High
TCGA-BH-A0BT	2365	Alive	825.62	High
TCGA-A8-A08P	943	Alive	825.89	High
TCGA-E2-A1IJ	865	Alive	825.95	High
TCGA-AN-A0XV	162	Alive	826.01	High
TCGA-C8-A278	297	Alive	827.31	High
TCGA-A2-A1FZ	683	Alive	827.47	High
TCGA-E9-A3Q9	1001	Alive	827.51	High
TCGA-AC-A6IV	568	Alive	827.72	High
TCGA-GM-A2DO	2596	Alive	827.76	High
TCGA-A2-A04V	1920	Dead	828.27	High
TCGA-A2-A0YL	1474	Alive	828.7	High
TCGA-AC-A6IX	373	Alive	828.73	High
TCGA-GM-A2DI	2590	Alive	829.91	High
TCGA-D8-A27N	519	Alive	831.25	High
TCGA-B6-A0WW	558	Dead	831.91	High
TCGA-AR-A0TV	2288	Alive	832.88	High
TCGA-BH-A0C7	2767	Alive	834.39	High
TCGA-A2-A0CO	3492	Dead	835.09	High
TCGA-E2-A15L	626	Alive	835.15	High
TCGA-C8-A1HN	394	Alive	836.09	High
TCGA-AO-A12D	2515	Alive	839.12	High
TCGA-BH-A1FG	3736	Dead	839.77	High
TCGA-D8-A1XZ	466	Alive	840.2	High
TCGA-B6-A0I1	2361	Dead	840.93	High
TCGA-EW-A1IW	371	Alive	841.21	High
TCGA-OL-A6VO	858	Alive	843.18	High
TCGA-A2-A04T	2246	Alive	843.26	High
TCGA-D8-A1X5	565	Alive	844.33	High
TCGA-D8-A27T	398	Alive	846.03	High
TCGA-BH-A1FJ	1927	Dead	846.14	High
TCGA-AR-A5QM	2231	Alive	848.07	High
TCGA-E9-A54X	727	Alive	848.56	High
TCGA-A2-A0CU	158	Dead	850.32	High
TCGA-AN-A0XW	170	Alive	851.97	High
TCGA-B6-A0IO	5042	Alive	852.37	High
TCGA-BH-A0DO	1644	Alive	852.81	High
TCGA-BH-A0DQ	98	Alive	852.88	High
TCGA-E2-A1AZ	2329	Alive	853.71	High
TCGA-BH-A1FC	3472	Dead	855.02	High
TCGA-BH-A1EY	538	Dead	855.25	High
TCGA-B6-A0WS	2965	Dead	855.77	High
TCGA-AO-A03V	1351	Alive	858.04	High
TCGA-E2-A14Q	1163	Alive	858.61	High
TCGA-GM-A2DN	3091	Alive	859.24	High
TCGA-AR-A2LL	2012	Alive	861.73	High
TCGA-BH-A0EA	991	Dead	863.26	High
TCGA-BH-A0DS	78	Alive	866.06	High
TCGA-BH-A18I	1093	Alive	866.57	High
TCGA-A8-A09I	1371	Alive	866.64	High
TCGA-S3-A6ZF	572	Alive	867.61	High
TCGA-AC-A2BM	3022	Alive	872.18	High
TCGA-BH-A28Q	1119	Alive	872.36	High
TCGA-LL-A440	759	Alive	872.74	High
TCGA-A2-A0CY	1673	Alive	873.54	High
TCGA-BH-A0DP	476	Alive	873.98	High
TCGA-BH-A0DG	2041	Alive	874.67	High
TCGA-C8-A3M8	394	Alive	875.2	High
TCGA-BH-A8G0	662	Alive	875.38	High
TCGA-A7-A3IY	345	Alive	876.39	High
TCGA-BH-A209	3959	Dead	876.59	High
TCGA-A7-A4SB	418	Alive	876.6	High
TCGA-A8-A08L	304	Dead	876.9	High
TCGA-C8-A12M	358	Alive	878.14	High
TCGA-E2-A10C	1220	Alive	878.21	High
TCGA-D8-A4Z1	659	Alive	878.72	High
TCGA-AN-A04C	54	Alive	879.59	High
TCGA-BH-A0EE	943	Alive	881	High
TCGA-A2-A0CV	3011	Alive	881.07	High
TCGA-BH-AB28	287	Alive	882.02	High
TCGA-BH-A18K	2763	Dead	882.16	High
TCGA-GM-A2DK	2645	Alive	883.38	High
TCGA-AC-A62X	417	Alive	884.77	High
TCGA-AN-A04D	52	Alive	885.69	High
TCGA-D8-A1X8	783	Alive	886.77	High
TCGA-D8-A1JL	611	Alive	887.12	High
TCGA-BH-A1F6	2965	Dead	887.32	High
TCGA-AN-A0AT	10	Alive	888.15	High
TCGA-B6-A1KN	4233	Alive	889.25	High
TCGA-E2-A1BC	501	Alive	889.42	High
TCGA-AR-A2LO	1198	Alive	890.09	High
TCGA-A2-A04N	4354	Alive	890.65	High
TCGA-E9-A1ND	1266	Alive	891.05	High
TCGA-BH-A18G	149	Alive	892.5	High
TCGA-AR-A1AI	3296	Alive	893.46	High
TCGA-GM-A4E0	2191	Alive	893.65	High
TCGA-BH-A18T	224	Dead	894.27	High
TCGA-D8-A1XB	552	Alive	894.38	High
TCGA-GM-A2DM	3226	Alive	895.77	High
TCGA-LL-A441	996	Alive	896.48	High
TCGA-D8-A1JG	1612	Alive	897.74	High
TCGA-A7-A0DB	1007	Alive	898.55	High
TCGA-AO-A129	3286	Alive	900	High
TCGA-B6-A0IK	571	Dead	901.16	High
TCGA-A2-A1G1	584	Alive	901.38	High
TCGA-A7-A0CD	1165	Alive	901.69	High
TCGA-D8-A1XY	503	Alive	902.18	High
TCGA-AR-A0TZ	3262	Dead	903.8	High
TCGA-C8-A3M7	1034	Dead	903.87	High
TCGA-D8-A1XU	395	Alive	903.98	High
TCGA-A2-A0YG	666	Alive	904.35	High
TCGA-A8-A09W	30	Alive	905.34	High
TCGA-BH-A0H9	1247	Alive	905.48	High
TCGA-A8-A09X	426	Dead	906.14	High
TCGA-E2-A3DX	1325	Alive	907.35	High
TCGA-E2-A1IF	1138	Alive	907.56	High
TCGA-BH-A0HO	76	Alive	907.81	High
TCGA-E9-A1R2	1063	Alive	908.92	High
TCGA-AR-A24S	2976	Alive	909.55	High
TCGA-BH-A1ES	3462	Dead	909.84	High
TCGA-AR-A2LQ	1233	Alive	911.71	High
TCGA-E2-A1IH	1026	Alive	911.82	High
TCGA-D8-A1J9	532	Alive	912.61	High
TCGA-A2-A0T5	531	Alive	912.92	High
TCGA-D8-A1JD	552	Alive	913.49	High
TCGA-D8-A73U	492	Alive	914.17	High
TCGA-A7-A0D9	1139	Alive	914.78	High
TCGA-B6-A40C	2164	Alive	916.45	High
TCGA-D8-A145	410	Alive	917.27	High
TCGA-A8-A08X	1308	Alive	917.66	High
TCGA-D8-A27M	410	Alive	918.41	High
TCGA-A2-A0EP	3603	Alive	918.61	High
TCGA-AR-A1AX	2629	Alive	919.85	High
TCGA-E2-A105	1308	Alive	919.87	High
TCGA-OL-A66K	1275	Dead	920.53	High
TCGA-A7-A3J1	343	Alive	921.07	High
TCGA-5L-AAT0	1477	Alive	921.54	High
TCGA-A2-A0YD	769	Alive	922.14	High
TCGA-AO-A0JB	1542	Alive	923.39	High
TCGA-A2-A0CM	754	Dead	925.35	High
TCGA-AN-A0XN	10	Alive	928.02	High
TCGA-A2-A0YM	965	Alive	928.26	High
TCGA-E2-A1LG	1523	Alive	929.36	High
TCGA-BH-A0E7	1363	Alive	930.24	High
TCGA-BH-A0BP	2296	Dead	930.29	High
TCGA-EW-A1J6	875	Alive	931.75	High
TCGA-AC-A2FE	2636	Dead	933.86	High
TCGA-E9-A2JS	904	Dead	934.85	High
TCGA-EW-A1PG	1051	Alive	935.36	High
TCGA-EW-A2FS	1604	Alive	935.48	High
TCGA-GM-A2DF	2155	Alive	938.25	High
TCGA-E2-A1BD	1133	Alive	940.61	High
TCGA-C8-A26Y	394	Alive	941.1	High
TCGA-D8-A73W	385	Dead	942.31	High
TCGA-EW-A1P6	562	Alive	942.45	High
TCGA-AC-A62Y	530	Alive	945.61	High
TCGA-AO-A0J4	1587	Alive	947.8	High
TCGA-A8-A086	396	Alive	948.82	High
TCGA-E2-A10B	1141	Alive	949.08	High
TCGA-C8-A8HQ	380	Alive	950	High
TCGA-E2-A1IO	1855	Alive	953.28	High
TCGA-AR-A24Z	3001	Alive	954.33	High
TCGA-A7-A6VX	317	Alive	954.96	High
TCGA-A7-A0CH	1079	Alive	955.12	High
TCGA-AC-A2FO	2255	Alive	955.39	High
TCGA-D8-A1XD	522	Alive	956.38	High
TCGA-AC-A8OS	70	Alive	956.98	High
TCGA-B6-A409	573	Dead	958.35	High
TCGA-D8-A1JI	577	Alive	959.08	High
TCGA-BH-A0HU	392	Alive	959.43	High
TCGA-A7-A5ZX	336	Alive	960.82	High
TCGA-E9-A1R3	78	Alive	961.42	High
TCGA-BH-A1F8	763	Dead	961.81	High
TCGA-E9-A245	26	Alive	964.01	High
TCGA-AC-A3OD	451	Alive	964.59	High
TCGA-A8-A08A	30	Alive	964.6	High
TCGA-GM-A2DH	2193	Alive	964.8	High
TCGA-AR-A1AY	1026	Alive	964.82	High
TCGA-D8-A13Y	1728	Alive	964.83	High
TCGA-A8-A06U	883	Dead	965.38	High
TCGA-C8-A1HM	375	Alive	966.38	High
TCGA-E2-A1B5	984	Alive	967.56	High
TCGA-AR-A1AN	2920	Alive	970.23	High
TCGA-AR-A1AM	2991	Alive	970.87	High
TCGA-AC-A2FF	2759	Alive	971.34	High
TCGA-A8-A085	1124	Alive	971.35	High
TCGA-BH-A0GZ	328	Alive	971.48	High
TCGA-E9-A1R4	186	Alive	972.87	High
TCGA-LL-A73Y	477	Alive	975.01	High
TCGA-D8-A1JJ	611	Alive	975.95	High
TCGA-E2-A15S	428	Alive	977.43	High
TCGA-D8-A141	626	Alive	981.28	High
TCGA-AO-A0JF	1980	Alive	986.16	High
TCGA-AR-A256	2854	Dead	987.06	High
TCGA-A2-A0ER	2263	Alive	987.25	High
TCGA-E9-A247	1186	Alive	987.92	High
TCGA-A2-A0YH	659	Alive	988.38	High
TCGA-E9-A1QZ	755	Alive	988.61	High
TCGA-A8-A099	304	Alive	989.62	High
TCGA-AR-A24U	3128	Alive	989.76	High
TCGA-EW-A1PE	320	Alive	990.22	High
TCGA-A2-A0YJ	566	Alive	992.27	High
TCGA-A8-A08G	607	Alive	995.57	High
TCGA-D8-A1XO	1682	Alive	995.61	High
TCGA-AO-A12F	1842	Alive	996	High
TCGA-A2-A0CW	3283	Alive	996.12	High
TCGA-AC-A8OP	614	Alive	997.03	High
TCGA-AR-A2LK	1649	Dead	997.68	High
TCGA-E9-A1RB	976	Dead	998.18	High
TCGA-AN-A041	7	Alive	999.67	High
TCGA-A7-A0CE	1074	Alive	1000.08	High
TCGA-A2-A0EW	1884	Dead	1001.77	High
TCGA-C8-A274	508	Alive	1002.35	High
TCGA-BH-A0E9	2489	Alive	1004.69	High
TCGA-AR-A1AH	3807	Alive	1005.8	High
TCGA-AR-A1AW	2632	Alive	1007.57	High
TCGA-A2-A0CL	3015	Alive	1009.27	High
TCGA-BH-A1FU	1688	Dead	1010.83	High
TCGA-C8-A138	380	Alive	1011.43	High
TCGA-BH-A0GY	923	Alive	1011.72	High
TCGA-AR-A1AJ	3072	Alive	1012.55	High
TCGA-D8-A146	643	Alive	1013.53	High
TCGA-BH-A0W3	728	Alive	1014.05	High
TCGA-AC-A23H	174	Dead	1014.36	High
TCGA-BH-A0E0	134	Alive	1017.67	High
TCGA-BH-A1ET	2520	Dead	1021.69	High
TCGA-A2-A0T0	533	Alive	1024.55	High
TCGA-B6-A401	2596	Alive	1024.97	High
TCGA-AN-A046	10	Alive	1024.99	High
TCGA-BH-A0BD	554	Alive	1028.45	High
TCGA-E2-A1B0	1631	Alive	1029.52	High
TCGA-B6-A0RT	2721	Alive	1029.72	High
TCGA-A8-A06Z	31	Alive	1030.21	High
TCGA-E2-A14N	1434	Alive	1030.6	High
TCGA-E2-A15C	694	Alive	1031.2	High
TCGA-A8-A08Z	1217	Alive	1032.96	High
TCGA-B6-A0RQ	4267	Dead	1033.4	High
TCGA-C8-A1HE	375	Alive	1034.76	High
TCGA-A2-A25E	3204	Alive	1037.11	High
TCGA-AC-A5XS	588	Alive	1037.33	High
TCGA-D8-A1JH	426	Alive	1037.41	High
TCGA-BH-A0H6	747	Alive	1038.93	High
TCGA-E2-A14W	974	Alive	1039.77	High
TCGA-D8-A1JE	575	Alive	1040.96	High
TCGA-AR-A0U2	2551	Dead	1042.56	High
TCGA-D8-A1JB	1688	Alive	1043.22	High
TCGA-A2-A0ST	3017	Alive	1043.74	High
TCGA-S3-AA11	421	Alive	1043.98	High
TCGA-B6-A0I5	8556	Alive	1044.29	High
TCGA-AO-A1KO	622	Alive	1044.5	High
TCGA-A8-A07L	975	Alive	1045.92	High
TCGA-B6-A0RM	2373	Dead	1046.2	High
TCGA-A2-A1FW	528	Alive	1046.51	High
TCGA-D8-A1XM	538	Alive	1047.47	High
TCGA-E2-A570	931	Alive	1051.9	High
TCGA-A8-A0A4	396	Alive	1051.99	High
TCGA-AC-A2FB	1234	Alive	1052.27	High
TCGA-D8-A13Z	635	Alive	1053.71	High
TCGA-AQ-A04L	3957	Alive	1055.92	High
TCGA-AC-A2QI	588	Alive	1058.94	High
TCGA-A8-A08B	1156	Alive	1059.19	High
TCGA-BH-A203	1174	Dead	1060.41	High
TCGA-A2-A0YC	990	Alive	1060.93	High
TCGA-E2-A15E	630	Alive	1061.23	High
TCGA-E2-A15F	658	Alive	1061.37	High
TCGA-AO-A12A	3112	Alive	1062.78	High
TCGA-AR-A2LN	1161	Alive	1064.11	High
TCGA-B6-A0RL	2469	Dead	1068.31	High
TCGA-E2-A1IN	675	Alive	1069.48	High
TCGA-BH-A8FY	295	Dead	1070.03	High
TCGA-BH-A1EN	2127	Dead	1073.28	High
TCGA-EW-A1J2	403	Alive	1074.13	High
TCGA-E2-A573	1062	Alive	1076.14	High
TCGA-A2-A25A	3276	Alive	1080.16	High
TCGA-A7-A13H	899	Alive	1084.12	High
TCGA-PL-A8LZ	302	Alive	1085.51	High
TCGA-D8-A27L	499	Alive	1085.57	High
TCGA-E2-A10E	865	Alive	1087.07	High
TCGA-E9-A1RH	1417	Alive	1089.21	High
TCGA-E2-A1LH	3247	Alive	1092.03	High
TCGA-AN-A0FZ	10	Alive	1092.21	High
TCGA-EW-A1OW	694	Alive	1092.26	High
TCGA-AQ-A04J	819	Alive	1093.3	High
TCGA-A2-A0YF	1535	Alive	1094.31	High
TCGA-E2-A15J	1640	Alive	1094.7	High
TCGA-BH-A0HQ	1121	Alive	1095.44	High
TCGA-EW-A1P1	1210	Alive	1096.35	High
TCGA-OL-A6VQ	600	Alive	1097.05	High
TCGA-A2-A259	1596	Alive	1098.63	High
TCGA-AR-A5QN	1013	Alive	1098.76	High
TCGA-C8-A1HI	343	Alive	1099.38	High
TCGA-A7-A13E	614	Dead	1099.61	High
TCGA-C8-A26Z	470	Alive	1103.02	High
TCGA-A2-A3KD	1206	Alive	1103.19	High
TCGA-A8-A0A1	365	Alive	1103.41	High
TCGA-E2-A106	2541	Alive	1103.95	High
TCGA-E2-A158	450	Alive	1104.62	High
TCGA-AC-A2FG	1853	Alive	1105.99	High
TCGA-D8-A1Y0	472	Alive	1107.24	High
TCGA-E9-A1NE	1088	Alive	1108	High
TCGA-AO-A0JC	1547	Alive	1108.14	High
TCGA-E2-A15R	1732	Alive	1109.26	High
TCGA-E2-A15H	393	Alive	1109.86	High
TCGA-E2-A1B1	2653	Alive	1110.39	High
TCGA-A2-A0CQ	2695	Alive	1115.86	High
TCGA-A7-A26J	627	Alive	1116.04	High
TCGA-A8-A09Q	761	Alive	1116.78	High
TCGA-GM-A3NY	1162	Alive	1117.16	High
TCGA-BH-A202	795	Alive	1119.46	High
TCGA-D8-A27H	397	Alive	1121.29	High
TCGA-A2-A0T3	1516	Alive	1123.21	High
TCGA-C8-A1HK	366	Alive	1123.78	High
TCGA-AN-A0XR	10	Alive	1124.85	High
TCGA-BH-A0W5	1288	Alive	1126.09	High
TCGA-E9-A244	21	Alive	1126.76	High
TCGA-A2-A25F	322	Alive	1130.05	High
TCGA-AN-A0AS	10	Alive	1130.89	High
TCGA-E2-A1L6	1648	Alive	1130.97	High
TCGA-E9-A227	975	Alive	1132.37	High
TCGA-AC-A6NO	51	Alive	1134.05	High
TCGA-A8-A075	518	Alive	1134.82	High
TCGA-A8-A06X	943	Dead	1136.12	High
TCGA-E2-A1IL	118	Alive	1137.22	High
TCGA-BH-A18Q	1692	Dead	1139.04	High
TCGA-A7-A3IZ	322	Alive	1139.76	High
TCGA-D8-A27F	488	Alive	1140.14	High
TCGA-D8-A27I	439	Alive	1145.44	High
TCGA-AR-A254	2605	Alive	1146.55	High
TCGA-A2-A1G6	501	Alive	1146.76	High
TCGA-WT-AB44	883	Alive	1147.63	High
TCGA-E2-A15P	595	Alive	1149.1	High
TCGA-D8-A1XR	482	Alive	1150.57	High
TCGA-A8-A07G	577	Alive	1151.1	High
TCGA-W8-A86G	347	Alive	1153.3	High
TCGA-BH-A0BG	1871	Alive	1153.38	High
TCGA-A8-A07O	304	Alive	1162.08	High
TCGA-AR-A0TP	4275	Alive	1162.56	High
TCGA-AR-A251	3030	Alive	1163.14	High
TCGA-B6-A0X5	2097	Dead	1163.36	High
TCGA-AQ-A1H3	989	Alive	1164.68	High
TCGA-C8-A1HO	375	Alive	1165.33	High
TCGA-A2-A0EV	968	Alive	1166.32	High
TCGA-AC-A2B8	677	Alive	1167.04	High
TCGA-A2-A0EM	3094	Alive	1169.03	High
TCGA-BH-A0BL	2278	Alive	1171.45	High
TCGA-A8-A07R	273	Alive	1174.97	High
TCGA-AC-A2FK	2650	Alive	1176.08	High
TCGA-BH-A201	856	Alive	1178.37	High
TCGA-E9-A1RF	200	Alive	1179.95	High
TCGA-EW-A1PH	607	Alive	1181.2	High
TCGA-LQ-A4E4	849	Alive	1183.47	High
TCGA-D8-A1XF	463	Alive	1183.54	High
TCGA-A2-A0ET	1066	Alive	1183.64	High
TCGA-BH-A0BO	2197	Alive	1185.84	High
TCGA-A2-A0YI	1505	Alive	1189.33	High
TCGA-AO-A0JL	1683	Alive	1189.64	High
TCGA-BH-A0DT	2403	Alive	1189.92	High
TCGA-E2-A1L8	2240	Alive	1192.14	High
TCGA-C8-A27B	439	Alive	1193.68	High
TCGA-D8-A1XA	839	Alive	1195.54	High
TCGA-A2-A0YK	588	Alive	1200.31	High
TCGA-A8-A08O	943	Alive	1203.79	High
TCGA-A8-A07U	760	Alive	1205.38	High
TCGA-AN-A03Y	10	Alive	1206.86	High
TCGA-E2-A2P6	1051	Alive	1207.07	High
TCGA-BH-A18P	921	Dead	1207.73	High
TCGA-B6-A0WV	2417	Dead	1208.73	High
TCGA-BH-A1FL	1673	Dead	1209.35	High
TCGA-AO-A1KS	350	Alive	1211.27	High
TCGA-AC-A2BK	2222	Alive	1212.66	High
TCGA-E2-A1L9	598	Alive	1214.5	High
TCGA-AR-A1AL	2971	Alive	1216.18	High
TCGA-AN-A0XT	10	Alive	1217.86	High
TCGA-A8-A08S	1004	Alive	1220.97	High
TCGA-BH-A1FB	3669	Dead	1221.31	High
TCGA-BH-A1F2	959	Dead	1221.35	High
TCGA-D8-A27V	381	Alive	1231.33	High
TCGA-AR-A0TS	2558	Alive	1232.15	High
TCGA-D8-A1JU	447	Alive	1233.05	High
TCGA-A2-A0ES	2190	Alive	1235.26	High
TCGA-C8-A27A	747	Alive	1236.37	High
TCGA-BH-A1FM	1388	Dead	1237.88	High
TCGA-AN-A0FF	172	Alive	1238.61	High
TCGA-A2-A0EU	1043	Alive	1240.47	High
TCGA-BH-A1F0	785	Dead	1240.99	High
TCGA-D8-A1XW	1309	Alive	1241.14	High
TCGA-AN-A0XU	10	Alive	1243.28	High
TCGA-A8-A091	1004	Alive	1246.51	High
TCGA-AR-A2LE	5062	Alive	1247.01	High
TCGA-A8-A09D	1522	Alive	1250.2	High
TCGA-A8-A092	942	Alive	1252.34	High
TCGA-B6-A1KI	2236	Alive	1253.52	High
TCGA-GM-A2D9	1812	Dead	1255.24	High
TCGA-A8-A09R	273	Alive	1255.99	High
TCGA-A8-A09K	912	Alive	1256.56	High
TCGA-A8-A07E	608	Alive	1257.88	High
TCGA-D8-A1JF	366	Alive	1259.8	High
TCGA-AN-A0G0	16	Alive	1260.64	High
TCGA-AN-A0XL	163	Alive	1263.9	High
TCGA-AN-A0FX	10	Alive	1264.43	High
TCGA-AR-A24N	3035	Alive	1264.85	High
TCGA-BH-A18H	652	Alive	1266.05	High
TCGA-BH-A18R	1142	Dead	1268.35	High
TCGA-D8-A1JN	620	Alive	1270.54	High
TCGA-A8-A09M	1006	Alive	1274.65	High
TCGA-A2-A0EN	4088	Alive	1279.03	High
TCGA-GM-A2DC	2535	Alive	1279.72	High
TCGA-BH-A1EX	1508	Dead	1280.53	High
TCGA-EW-A1J5	477	Alive	1286.05	High
TCGA-E9-A1RD	34	Alive	1291.05	High
TCGA-BH-A0H0	461	Alive	1295.03	High
TCGA-D8-A147	584	Alive	1296.76	High
TCGA-A7-A5ZW	326	Alive	1298.94	High
TCGA-AN-A0FY	10	Alive	1300.86	High
TCGA-A8-A097	365	Alive	1301.41	High
TCGA-A7-A26I	661	Alive	1310.37	High
TCGA-A8-A076	1642	Alive	1311.6	High
TCGA-D8-A140	403	Alive	1314.76	High
TCGA-E2-A14V	1042	Alive	1316.19	High
TCGA-E2-A15I	1692	Alive	1322.56	High
TCGA-AR-A1AR	524	Dead	1323.78	High
TCGA-E9-A3HO	1158	Alive	1337.25	High
TCGA-E9-A229	1148	Alive	1341.4	High
TCGA-A7-A26H	724	Alive	1342.3	High
TCGA-A7-A0DA	1085	Alive	1348.73	High
TCGA-A8-A09B	365	Alive	1349.67	High
TCGA-A8-A08J	1127	Dead	1349.97	High
TCGA-AR-A24L	2866	Dead	1359.62	High
TCGA-AR-A24P	84	Alive	1360.62	High
TCGA-AR-A252	2838	Alive	1365.93	High
TCGA-B6-A1KF	3088	Alive	1367.59	High
TCGA-D8-A1XC	377	Dead	1368.91	High
TCGA-D8-A1JC	480	Alive	1369.35	High
TCGA-EW-A1IY	258	Alive	1372.54	High
TCGA-D8-A27P	49	Alive	1376.28	High
TCGA-B6-A1KC	1326	Alive	1381.04	High
TCGA-B6-A0X4	860	Dead	1382.53	High
TCGA-AR-A255	2161	Alive	1393.54	High
TCGA-AN-A0XP	9	Alive	1395.82	High
TCGA-AR-A24H	4894	Alive	1397.11	High
TCGA-AN-A0FW	11	Alive	1400.5	High
TCGA-A8-A093	546	Alive	1402.49	High
TCGA-E2-A15M	336	Dead	1405.32	High
TCGA-E9-A2JT	288	Alive	1405.81	High
TCGA-E9-A243	612	Alive	1410.97	High
TCGA-A8-A06T	1614	Alive	1416.81	High
TCGA-E9-A22H	1232	Alive	1419.4	High
TCGA-B6-A0WT	5739	Alive	1423.87	High
TCGA-A7-A26E	954	Alive	1432.44	High
TCGA-E9-A248	59	Alive	1437.36	High
TCGA-AR-A24R	3430	Alive	1442.87	High
TCGA-B6-A0I9	362	Dead	1461.12	High
TCGA-A8-A09A	304	Alive	1470.77	High
TCGA-BH-A0H3	1928	Alive	1487.9	High
TCGA-A8-A0A6	640	Alive	1494.88	High
TCGA-AO-A1KP	2953	Alive	1498.7	High
TCGA-EW-A1J3	504	Alive	1499.73	High
TCGA-BH-A1EW	1694	Dead	1504.67	High
TCGA-AR-A0TR	160	Dead	1508.95	High
TCGA-A8-A07B	1308	Alive	1509.72	High
TCGA-A8-A08R	30	Alive	1516.22	High
TCGA-BH-A1EU	1286	Dead	1521.83	High
TCGA-AR-A24W	1550	Alive	1534.34	High
TCGA-A8-A06O	396	Alive	1539.22	High
TCGA-A2-A0D3	1873	Alive	1546.99	High
TCGA-A2-A04Y	1099	Alive	1561.39	High
TCGA-D8-A1XG	448	Alive	1565.28	High
TCGA-A8-A08I	365	Alive	1565.32	High
TCGA-E2-A15D	526	Alive	1566.72	High
TCGA-D8-A1JP	639	Alive	1601.83	High
TCGA-A2-A1FV	714	Alive	1602.98	High
TCGA-A2-A25C	523	Alive	1605.43	High
TCGA-A8-A07F	577	Alive	1609.34	High
TCGA-D8-A1XV	461	Alive	1618.75	High
TCGA-D8-A1J8	431	Alive	1625.58	High
TCGA-A8-A06Y	791	Alive	1626.67	High
TCGA-B6-A0IP	3926	Dead	1628.54	High
TCGA-E9-A1RA	1369	Alive	1636.53	High
TCGA-D8-A27K	1461	Alive	1647.67	High
TCGA-A8-A095	1277	Alive	1649.23	High
TCGA-E2-A1LI	3121	Alive	1659.86	High
TCGA-A8-A09C	31	Alive	1688.59	High
TCGA-B6-A0I8	749	Dead	1688.64	High
TCGA-E2-A14X	972	Alive	1689.07	High
TCGA-A8-A084	458	Alive	1689.65	High
TCGA-E9-A249	217	Alive	1695.79	High
TCGA-C8-A1HJ	5	Alive	1696.78	High
TCGA-A8-A0A2	579	Alive	1702.06	High
TCGA-A7-A13G	718	Alive	1717.36	High
TCGA-A8-A07C	1034	Alive	1719.95	High
TCGA-AC-A23C	585	Alive	1726.27	High
TCGA-E9-A1R5	92	Alive	1763.02	High
TCGA-A8-A08T	3409	Dead	1789.68	High
TCGA-D8-A1JA	502	Alive	1791.17	High
TCGA-BH-A1F5	2712	Dead	1801.4	High
TCGA-A8-A06Q	31	Alive	1807.66	High
TCGA-B6-A402	2134	Alive	1816.63	High
TCGA-BH-A1FN	2192	Dead	1820.45	High
TCGA-A8-A0AB	518	Alive	1847.96	High
TCGA-E9-A1R7	1467	Alive	1859.25	High
TCGA-AR-A24K	1548	Alive	1902.41	High
TCGA-E9-A24A	747	Alive	2080.38	High
TCGA-E2-A1LS	1604	Alive	2095.6	High
TCGA-E9-A226	1048	Dead	2257.22	High
TCGA-A8-A08C	881	Alive	2310.87	High
TCGA-A8-A09V	457	Alive	2556.78	High

## Sheet: CCNE1 in BRCA
Patient	Days	Status	Expression	Group
TCGA-A8-A08C	881	Alive	7.45	Low
TCGA-BH-A0DV	2064	Alive	7.74	Low
TCGA-E2-A1B4	1004	Dead	7.93	Low
TCGA-AN-A0XT	10	Alive	8.63	Low
TCGA-A2-A4S0	706	Alive	8.87	Low
TCGA-A2-A1G6	501	Alive	9.01	Low
TCGA-E2-A15I	1692	Alive	9.54	Low
TCGA-BH-A0EA	991	Dead	10.05	Low
TCGA-AO-A12B	2989	Alive	10.15	Low
TCGA-D8-A1XC	377	Dead	10.19	Low
TCGA-A2-A0D3	1873	Alive	10.64	Low
TCGA-A2-A0CV	3011	Alive	11.17	Low
TCGA-AC-A2FK	2650	Alive	11.56	Low
TCGA-A2-A0YI	1505	Alive	11.93	Low
TCGA-MS-A51U	681	Alive	12	Low
TCGA-B6-A0RQ	4267	Dead	12.07	Low
TCGA-BH-A18S	2009	Dead	12.08	Low
TCGA-A8-A09V	457	Alive	12.1	Low
TCGA-A7-A3RF	408	Alive	12.25	Low
TCGA-D8-A1JI	577	Alive	12.35	Low
TCGA-D8-A1JU	447	Alive	12.81	Low
TCGA-AC-A8OR	40	Alive	12.85	Low
TCGA-D8-A3Z5	1015	Alive	12.92	Low
TCGA-B6-A0X4	860	Dead	12.99	Low
TCGA-A7-A5ZX	336	Alive	13.09	Low
TCGA-AQ-A1H2	475	Alive	13.3	Low
TCGA-HN-A2OB	1900	Dead	13.49	Low
TCGA-BH-A28Q	1119	Alive	13.63	Low
TCGA-AR-A0TR	160	Dead	13.73	Low
TCGA-D8-A1XV	461	Alive	13.91	Low
TCGA-D8-A1JN	620	Alive	13.99	Low
TCGA-BH-A0BM	1876	Alive	14.01	Low
TCGA-E9-A1R3	78	Alive	14.03	Low
TCGA-GI-A2C8	225	Alive	14.39	Low
TCGA-AR-A2LN	1161	Alive	14.46	Low
TCGA-AN-A03X	10	Alive	14.67	Low
TCGA-BH-A0HI	620	Alive	14.77	Low
TCGA-E9-A3Q9	1001	Alive	14.85	Low
TCGA-B6-A0I8	749	Dead	15.01	Low
TCGA-D8-A1XZ	466	Alive	15.14	Low
TCGA-BH-A0H3	1928	Alive	15.17	Low
TCGA-AC-A3QP	675	Alive	15.28	Low
TCGA-BH-A0DE	2372	Alive	15.57	Low
TCGA-B6-A0RM	2373	Dead	15.66	Low
TCGA-B6-A2IU	5176	Alive	15.82	Low
TCGA-EW-A1J2	403	Alive	15.82	Low
TCGA-D8-A1XG	448	Alive	15.86	Low
TCGA-A7-A13G	718	Alive	15.87	Low
TCGA-A2-A0CP	2813	Alive	16.09	Low
TCGA-D8-A1XY	503	Alive	16.19	Low
TCGA-E9-A245	26	Alive	16.23	Low
TCGA-GM-A2DM	3226	Alive	16.26	Low
TCGA-E2-A14U	1318	Alive	16.52	Low
TCGA-E2-A1BC	501	Alive	16.71	Low
TCGA-A8-A099	304	Alive	16.77	Low
TCGA-LL-A6FP	677	Alive	17.14	Low
TCGA-AO-A0JF	1980	Alive	17.29	Low
TCGA-A8-A0A2	579	Alive	17.4	Low
TCGA-AN-A046	10	Alive	17.42	Low
TCGA-D8-A4Z1	659	Alive	17.45	Low
TCGA-A8-A07J	365	Alive	17.48	Low
TCGA-BH-A0BO	2197	Alive	17.54	Low
TCGA-E2-A15C	694	Alive	17.6	Low
TCGA-B6-A0RN	8008	Alive	17.68	Low
TCGA-WT-AB44	883	Alive	17.92	Low
TCGA-A2-A1FV	714	Alive	17.96	Low
TCGA-BH-A8G0	662	Alive	18.23	Low
TCGA-AO-A1KO	622	Alive	18.4	Low
TCGA-E2-A15D	526	Alive	18.56	Low
TCGA-BH-A18N	1148	Dead	18.87	Low
TCGA-D8-A27P	49	Alive	18.91	Low
TCGA-GM-A5PV	412	Alive	19.02	Low
TCGA-OL-A66K	1275	Dead	19.07	Low
TCGA-A8-A091	1004	Alive	19.09	Low
TCGA-AC-A2FG	1853	Alive	19.44	Low
TCGA-A2-A0CZ	1616	Alive	19.52	Low
TCGA-D8-A140	403	Alive	19.62	Low
TCGA-BH-A1FG	3736	Dead	19.66	Low
TCGA-AC-A2QI	588	Alive	19.7	Low
TCGA-EW-A1PG	1051	Alive	19.89	Low
TCGA-AN-A0FT	214	Alive	19.93	Low
TCGA-OL-A6VR	1220	Alive	20.08	Low
TCGA-AN-A0XL	163	Alive	20.21	Low
TCGA-A2-A0YC	990	Alive	20.22	Low
TCGA-LL-A50Y	762	Alive	20.28	Low
TCGA-D8-A73W	385	Dead	20.48	Low
TCGA-C8-A1HK	366	Alive	20.51	Low
TCGA-BH-A28O	1120	Alive	20.59	Low
TCGA-D8-A3Z6	563	Alive	20.64	Low
TCGA-C8-A12N	358	Alive	20.96	Low
TCGA-B6-A0X5	2097	Dead	21.03	Low
TCGA-A8-A08B	1156	Alive	21.2	Low
TCGA-AR-A1AL	2971	Alive	21.39	Low
TCGA-A2-A0ES	2190	Alive	21.55	Low
TCGA-A2-A0ET	1066	Alive	21.67	Low
TCGA-GM-A2D9	1812	Dead	21.69	Low
TCGA-GM-A4E0	2191	Alive	22.03	Low
TCGA-A2-A0CO	3492	Dead	22.14	Low
TCGA-AN-A0XS	10	Alive	22.23	Low
TCGA-EW-A1P6	562	Alive	22.23	Low
TCGA-AO-A12C	2372	Alive	22.37	Low
TCGA-BH-A1ET	2520	Dead	22.6	Low
TCGA-BH-A18H	652	Alive	22.77	Low
TCGA-BH-A6R8	293	Alive	22.77	Low
TCGA-BH-A1EU	1286	Dead	22.92	Low
TCGA-AR-A1AK	3159	Alive	22.93	Low
TCGA-A2-A0EO	2442	Alive	22.96	Low
TCGA-GM-A5PX	551	Alive	23.06	Low
TCGA-EW-A1J1	575	Alive	23.1	Low
TCGA-A8-A06R	547	Alive	23.13	Low
TCGA-E2-A1BD	1133	Alive	23.15	Low
TCGA-E2-A1IL	118	Alive	23.39	Low
TCGA-AN-A0XP	9	Alive	23.47	Low
TCGA-OL-A5RX	878	Alive	23.6	Low
TCGA-AN-A0AS	10	Alive	23.88	Low
TCGA-AN-A0FS	210	Alive	24.06	Low
TCGA-AN-A0XV	162	Alive	24.06	Low
TCGA-BH-A0DH	1156	Alive	24.09	Low
TCGA-C8-A138	380	Alive	24.14	Low
TCGA-A2-A0YD	769	Alive	24.16	Low
TCGA-BH-A0HO	76	Alive	24.32	Low
TCGA-A7-A5ZW	326	Alive	24.57	Low
TCGA-A2-A0CQ	2695	Alive	24.65	Low
TCGA-AR-A2LM	1935	Alive	24.65	Low
TCGA-D8-A27V	381	Alive	24.96	Low
TCGA-AR-A24W	1550	Alive	24.97	Low
TCGA-E2-A1L8	2240	Alive	25.08	Low
TCGA-A2-A0YF	1535	Alive	25.24	Low
TCGA-BH-A0E7	1363	Alive	25.32	Low
TCGA-E2-A3DX	1325	Alive	25.35	Low
TCGA-A2-A04N	4354	Alive	25.36	Low
TCGA-A2-A0EX	752	Alive	25.39	Low
TCGA-AC-A23G	2248	Alive	25.44	Low
TCGA-A8-A093	546	Alive	25.52	Low
TCGA-A8-A0A1	365	Alive	25.6	Low
TCGA-E9-A1R0	860	Alive	25.81	Low
TCGA-A2-A0T6	575	Alive	26	Low
TCGA-AC-A3BB	987	Alive	26.06	Low
TCGA-A8-A0A6	640	Alive	26.07	Low
TCGA-AR-A24T	3202	Alive	26.09	Low
TCGA-AC-A2B8	677	Alive	26.2	Low
TCGA-OL-A6VQ	600	Alive	26.26	Low
TCGA-A8-A08T	3409	Dead	26.29	Low
TCGA-A8-A08A	30	Alive	26.77	Low
TCGA-BH-A42V	635	Alive	26.78	Low
TCGA-E9-A1NH	576	Alive	26.83	Low
TCGA-AR-A1AM	2991	Alive	26.86	Low
TCGA-BH-A0BV	1519	Alive	26.86	Low
TCGA-EW-A1OX	911	Alive	27.25	Low
TCGA-A2-A0EN	4088	Alive	27.41	Low
TCGA-E2-A15J	1640	Alive	27.56	Low
TCGA-A2-A0CS	2348	Dead	27.69	Low
TCGA-AR-A24V	3203	Alive	27.71	Low
TCGA-W8-A86G	347	Alive	28	Low
TCGA-LD-A66U	646	Alive	28.09	Low
TCGA-BH-A1FB	3669	Dead	28.47	Low
TCGA-AO-A0JJ	1887	Alive	28.81	Low
TCGA-A7-A426	364	Alive	28.84	Low
TCGA-A2-A4RY	648	Alive	29.04	Low
TCGA-A2-A4S2	643	Alive	29.05	Low
TCGA-A8-A09T	579	Alive	29.09	Low
TCGA-A2-A259	1596	Alive	29.24	Low
TCGA-A1-A0SH	1437	Alive	29.25	Low
TCGA-A2-A25D	552	Alive	29.32	Low
TCGA-OL-A5D8	973	Alive	29.36	Low
TCGA-E2-A1IK	1800	Alive	29.44	Low
TCGA-D8-A27I	439	Alive	29.73	Low
TCGA-BH-A0B6	2483	Alive	29.81	Low
TCGA-OL-A5RU	1219	Alive	29.81	Low
TCGA-BH-A0HP	414	Alive	29.93	Low
TCGA-AR-A2LE	5062	Alive	29.94	Low
TCGA-E2-A15L	626	Alive	29.99	Low
TCGA-BH-A0HK	178	Alive	30.03	Low
TCGA-GM-A2DI	2590	Alive	30.06	Low
TCGA-BH-A0BS	2612	Alive	30.1	Low
TCGA-A2-A0EW	1884	Dead	30.11	Low
TCGA-BH-A0DO	1644	Alive	30.31	Low
TCGA-BH-A0HQ	1121	Alive	30.59	Low
TCGA-E9-A1RE	1419	Alive	30.63	Low
TCGA-A2-A0SY	1347	Alive	30.66	Low
TCGA-E2-A15P	595	Alive	30.66	Low
TCGA-AO-A1KQ	1882	Alive	30.74	Low
TCGA-AO-A0J8	680	Alive	30.81	Low
TCGA-GM-A3XG	1330	Alive	30.88	Low
TCGA-A7-A26E	954	Alive	31.06	Low
TCGA-E2-A153	707	Alive	31.15	Low
TCGA-AC-A23E	698	Alive	31.18	Low
TCGA-D8-A1XO	1682	Alive	31.23	Low
TCGA-D8-A1XR	482	Alive	31.25	Low
TCGA-B6-A0IH	3418	Dead	31.3	Low
TCGA-A8-A0A9	822	Alive	31.34	Low
TCGA-AO-A03R	2091	Alive	31.38	Low
TCGA-D8-A1XD	522	Alive	31.49	Low
TCGA-C8-A1HG	345	Alive	31.52	Low
TCGA-OL-A66L	1301	Alive	31.82	Low
TCGA-A1-A0SQ	554	Alive	31.87	Low
TCGA-BH-A0EB	745	Alive	31.94	Low
TCGA-BH-A0H6	747	Alive	32.04	Low
TCGA-EW-A1OZ	1229	Alive	32.07	Low
TCGA-AC-A2FB	1234	Alive	32.09	Low
TCGA-BH-A0BT	2365	Alive	32.21	Low
TCGA-AC-A5XU	455	Alive	32.27	Low
TCGA-BH-A0DQ	98	Alive	32.28	Low
TCGA-AO-A12A	3112	Alive	32.41	Low
TCGA-BH-A0B1	1148	Alive	32.41	Low
TCGA-A2-A0YK	588	Alive	32.51	Low
TCGA-5L-AAT1	1471	Alive	32.6	Low
TCGA-A7-A13H	899	Alive	32.62	Low
TCGA-A7-A0CJ	931	Alive	32.83	Low
TCGA-BH-A0AY	777	Alive	33.03	Low
TCGA-BH-A1FL	1673	Dead	33.04	Low
TCGA-BH-A1FH	1034	Dead	33.13	Low
TCGA-A7-A3IZ	322	Alive	33.16	Low
TCGA-BH-A0W5	1288	Alive	33.32	Low
TCGA-A2-A0EV	968	Alive	33.33	Low
TCGA-AC-A2FO	2255	Alive	33.36	Low
TCGA-E2-A15E	630	Alive	33.4	Low
TCGA-A7-A0CD	1165	Alive	33.45	Low
TCGA-D8-A27T	398	Alive	33.5	Low
TCGA-A8-A0A4	396	Alive	33.51	Low
TCGA-E2-A14Q	1163	Alive	33.52	Low
TCGA-BH-A0DT	2403	Alive	33.67	Low
TCGA-E2-A156	726	Alive	33.74	Low
TCGA-BH-A0B0	2477	Alive	33.87	Low
TCGA-A8-A08Z	1217	Alive	33.94	Low
TCGA-B6-A0RO	4929	Alive	34.09	Low
TCGA-OL-A5RV	1062	Alive	34.21	Low
TCGA-BH-A42U	3364	Alive	34.24	Low
TCGA-GM-A2DC	2535	Alive	34.47	Low
TCGA-A1-A0SD	437	Alive	34.74	Low
TCGA-A2-A0EM	3094	Alive	34.8	Low
TCGA-GM-A2DL	3519	Alive	34.87	Low
TCGA-AN-A0FK	213	Alive	34.99	Low
TCGA-A2-A0CK	4159	Alive	35.15	Low
TCGA-BH-A0DP	476	Alive	35.15	Low
TCGA-D8-A73U	492	Alive	35.16	Low
TCGA-BH-A0HW	1561	Alive	35.32	Low
TCGA-A2-A25A	3276	Alive	35.33	Low
TCGA-A7-A0CH	1079	Alive	35.33	Low
TCGA-E2-A1IU	337	Alive	35.35	Low
TCGA-BH-A204	2534	Dead	35.41	Low
TCGA-AC-A23C	585	Alive	35.49	Low
TCGA-D8-A1X8	783	Alive	35.65	Low
TCGA-E2-A1L6	1648	Alive	35.84	Low
TCGA-A2-A1FW	528	Alive	35.9	Low
TCGA-AC-A4ZE	890	Alive	35.98	Low
TCGA-BH-A18I	1093	Alive	36.06	Low
TCGA-S3-AA14	529	Alive	36.06	Low
TCGA-D8-A141	626	Alive	36.08	Low
TCGA-BH-A0HN	516	Alive	36.22	Low
TCGA-BH-A0HF	727	Alive	36.23	Low
TCGA-D8-A145	410	Alive	36.32	Low
TCGA-E9-A226	1048	Dead	36.33	Low
TCGA-D8-A27K	1461	Alive	36.47	Low
TCGA-BH-A8FY	295	Dead	36.61	Low
TCGA-E2-A1IJ	865	Alive	36.61	Low
TCGA-E9-A227	975	Alive	36.7	Low
TCGA-E9-A1R5	92	Alive	36.74	Low
TCGA-AC-A3EH	197	Dead	36.97	Low
TCGA-AQ-A1H3	989	Alive	37.02	Low
TCGA-BH-A0BP	2296	Dead	37.11	Low
TCGA-A2-A25B	1291	Alive	37.21	Low
TCGA-AR-A1AU	2868	Alive	37.27	Low
TCGA-AC-A8OS	70	Alive	37.31	Low
TCGA-E9-A54Y	725	Alive	37.32	Low
TCGA-A7-A3J1	343	Alive	37.35	Low
TCGA-OL-A66J	1996	Alive	37.4	Low
TCGA-AC-A3TN	456	Alive	37.5	Low
TCGA-C8-A1HE	375	Alive	37.51	Low
TCGA-BH-A1F5	2712	Dead	37.58	Low
TCGA-XX-A89A	488	Alive	37.79	Low
TCGA-B6-A0IP	3926	Dead	38.37	Low
TCGA-E9-A24A	747	Alive	38.39	Low
TCGA-A2-A0YL	1474	Alive	38.44	Low
TCGA-C8-A12M	358	Alive	38.62	Low
TCGA-D8-A1JH	426	Alive	38.74	Low
TCGA-AC-A3W7	471	Alive	38.96	Low
TCGA-E2-A109	1417	Alive	39.11	Low
TCGA-BH-A0DS	78	Alive	39.37	Low
TCGA-A8-A07G	577	Alive	39.49	Low
TCGA-AR-A24N	3035	Alive	39.51	Low
TCGA-AO-A0JA	655	Alive	39.54	Low
TCGA-A2-A0T7	631	Alive	39.58	Low
TCGA-E9-A22E	1269	Alive	39.69	Low
TCGA-A7-A4SC	446	Alive	39.76	Low
TCGA-A2-A4S1	820	Alive	39.99	Low
TCGA-A2-A3XW	1712	Alive	40.04	Low
TCGA-XX-A899	467	Alive	40.16	Low
TCGA-B6-A0I5	8556	Alive	40.32	Low
TCGA-B6-A0WY	3461	Dead	40.33	Low
TCGA-A2-A0T1	521	Alive	40.45	Low
TCGA-OL-A5DA	1783	Alive	40.7	Low
TCGA-D8-A1JB	1688	Alive	40.87	Low
TCGA-B6-A0RI	7126	Alive	40.95	Low
TCGA-A7-A26H	724	Alive	40.99	Low
TCGA-BH-A0B8	1569	Alive	41.33	Low
TCGA-AQ-A7U7	584	Dead	41.38	Low
TCGA-E2-A572	1208	Alive	41.48	Low
TCGA-E2-A14S	1009	Alive	41.62	Low
TCGA-A8-A09N	31	Alive	41.89	Low
TCGA-EW-A1PE	320	Alive	42.28	Low
TCGA-AC-A2FF	2759	Alive	42.51	Low
TCGA-AR-A0TV	2288	Alive	42.69	Low
TCGA-BH-A1EV	365	Dead	42.69	Low
TCGA-E2-A106	2541	Alive	42.74	Low
TCGA-AR-A1AV	1864	Alive	42.8	Low
TCGA-E2-A15O	1545	Alive	42.86	Low
TCGA-BH-A0W4	759	Alive	42.91	Low
TCGA-BH-A0BQ	2255	Alive	42.93	Low
TCGA-D8-A1XB	552	Alive	42.98	Low
TCGA-E2-A1L9	598	Alive	43.12	Low
TCGA-D8-A27L	499	Alive	43.33	Low
TCGA-LL-A442	889	Alive	43.38	Low
TCGA-C8-A27A	747	Alive	43.52	Low
TCGA-LL-A440	759	Alive	43.67	Low
TCGA-E9-A54X	727	Alive	43.69	Low
TCGA-GM-A3XN	2019	Alive	44	Low
TCGA-AR-A24R	3430	Alive	44.01	Low
TCGA-AO-A03P	2911	Dead	44.08	Low
TCGA-OL-A5D6	1104	Dead	44.08	Low
TCGA-3C-AALK	1448	Alive	44.27	Low
TCGA-A8-A06P	396	Alive	44.28	Low
TCGA-AR-A0U3	4080	Alive	44.5	Low
TCGA-Z7-A8R5	3287	Alive	44.8	Low
TCGA-A2-A04V	1920	Dead	44.82	Low
TCGA-PE-A5DE	2645	Alive	44.86	Low
TCGA-EW-A1P5	703	Alive	44.92	Low
TCGA-GM-A3NW	3361	Alive	45.09	Low
TCGA-AC-A3YI	707	Alive	45.26	Low
TCGA-PL-A8LX	5	Alive	45.4	Low
TCGA-AN-A0XO	375	Alive	45.48	Low
TCGA-D8-A146	643	Alive	45.92	Low
TCGA-B6-A0WW	558	Dead	46	Low
TCGA-BH-A0HX	829	Alive	46.13	Low
TCGA-BH-A0BC	974	Alive	46.2	Low
TCGA-AO-A03L	2442	Alive	46.3	Low
TCGA-A8-A09B	365	Alive	46.32	Low
TCGA-E2-A2P6	1051	Alive	46.56	Low
TCGA-AN-A0FD	196	Alive	46.57	Low
TCGA-AR-A2LL	2012	Alive	46.57	Low
TCGA-AQ-A04H	754	Alive	46.72	Low
TCGA-A2-A0CR	3283	Alive	46.82	Low
TCGA-A2-A3KD	1206	Alive	46.84	Low
TCGA-OL-A66N	792	Alive	46.84	Low
TCGA-AQ-A0Y5	172	Dead	46.95	Low
TCGA-BH-A0BJ	660	Alive	46.98	Low
TCGA-A2-A0T5	531	Alive	47.05	Low
TCGA-A8-A09Q	761	Alive	47.1	Low
TCGA-BH-A2L8	612	Alive	47.38	Low
TCGA-AR-A252	2838	Alive	47.41	Low
TCGA-E2-A152	2128	Alive	47.89	Low
TCGA-AO-A0JI	1528	Alive	48.09	Low
TCGA-B6-A0WZ	6292	Alive	48.5	Low
TCGA-BH-A18L	811	Dead	48.55	Low
TCGA-AC-A2FE	2636	Dead	48.89	Low
TCGA-AN-A03Y	10	Alive	48.95	Low
TCGA-AR-A5QM	2231	Alive	48.97	Low
TCGA-BH-A0DI	912	Alive	48.97	Low
TCGA-AC-A3HN	496	Alive	49.25	Low
TCGA-A2-A04R	3709	Alive	49.26	Low
TCGA-AR-A2LO	1198	Alive	49.31	Low
TCGA-E2-A1IO	1855	Alive	49.31	Low
TCGA-E2-A1IG	2140	Alive	49.53	Low
TCGA-B6-A40B	3152	Alive	49.59	Low
TCGA-E2-A154	591	Alive	49.7	Low
TCGA-LD-A7W5	216	Alive	49.7	Low
TCGA-A2-A1FX	1847	Alive	49.83	Low
TCGA-A2-A0SU	1662	Alive	49.94	Low
TCGA-E9-A1NG	786	Dead	49.94	Low
TCGA-B6-A1KC	1326	Alive	49.97	Low
TCGA-AR-A5QN	1013	Alive	49.98	Low
TCGA-A2-A0D4	767	Alive	50.05	Low
TCGA-E2-A15K	275	Alive	50.14	Low
TCGA-B6-A0RG	2082	Alive	50.31	Low
TCGA-5L-AAT0	1477	Alive	50.45	Low
TCGA-C8-A12W	385	Alive	50.5	Low
TCGA-AC-A8OP	614	Alive	50.73	Low
TCGA-BH-A0DG	2041	Alive	50.86	Low
TCGA-D8-A1XW	1309	Alive	50.86	Low
TCGA-A2-A1FZ	683	Alive	50.89	Low
TCGA-E2-A1LH	3247	Alive	50.94	Low
TCGA-A7-A3J0	313	Alive	51.12	Low
TCGA-A8-A07W	304	Alive	51.16	Low
TCGA-BH-A0B4	1191	Alive	51.26	Low
TCGA-AQ-A04L	3957	Alive	51.27	Low
TCGA-EW-A1J5	477	Alive	51.32	Low
TCGA-D8-A1X9	727	Alive	51.35	Low
TCGA-Z7-A8R6	3256	Alive	51.5	Low
TCGA-BH-A0H5	1620	Alive	51.56	Low
TCGA-AR-A1AN	2920	Alive	51.59	Low
TCGA-A8-A06Z	31	Alive	51.67	Low
TCGA-AR-A255	2161	Alive	51.83	Low
TCGA-E2-A108	837	Alive	51.9	Low
TCGA-D8-A1XA	839	Alive	51.93	Low
TCGA-EW-A3E8	1035	Alive	51.98	Low
TCGA-A8-A06T	1614	Alive	52.07	Low
TCGA-E2-A15T	1563	Alive	52.07	Low
TCGA-A2-A3KC	1102	Alive	52.55	Low
TCGA-AC-A3OD	451	Alive	52.61	Low
TCGA-A8-A07P	334	Alive	52.87	Low
TCGA-D8-A1JE	575	Alive	52.9	Low
TCGA-E2-A14O	1359	Alive	52.91	Low
TCGA-BH-A0EI	1926	Alive	52.92	Low
TCGA-A8-A09A	304	Alive	53.01	Low
TCGA-AO-A03N	2031	Alive	53.08	Low
TCGA-A2-A0ER	2263	Alive	53.34	Low
TCGA-AN-A0FW	11	Alive	53.34	Low
TCGA-AR-A24S	2976	Alive	53.35	Low
TCGA-GM-A3NY	1162	Alive	53.38	Low
TCGA-E2-A10F	878	Alive	53.4	Low
TCGA-D8-A1XU	395	Alive	53.6	Low
TCGA-B6-A0WT	5739	Alive	54.07	Low
TCGA-A7-A3IY	345	Alive	54.14	Low
TCGA-EW-A1IY	258	Alive	54.18	Low
TCGA-AN-A0FZ	10	Alive	54.35	Low
TCGA-AO-A1KP	2953	Alive	54.38	Low
TCGA-AN-A049	19	Alive	54.72	Low
TCGA-C8-A1HI	343	Alive	54.87	Low
TCGA-BH-A8FZ	574	Alive	55.02	Low
TCGA-E9-A1R2	1063	Alive	55.2	Low
TCGA-D8-A1X6	541	Alive	55.36	Low
TCGA-GM-A2DA	6593	Dead	55.37	Low
TCGA-E2-A1B5	984	Alive	55.48	Low
TCGA-AC-A6IV	568	Alive	55.8	Low
TCGA-E9-A1RD	34	Alive	55.83	Low
TCGA-A7-A0DC	906	Alive	55.87	Low
TCGA-D8-A1XF	463	Alive	55.91	Low
TCGA-E2-A1LA	748	Alive	56.07	Low
TCGA-AO-A03V	1351	Alive	56.08	Low
TCGA-A8-A086	396	Alive	56.57	Low
TCGA-4H-AAAK	348	Alive	56.6	Low
TCGA-C8-A26Z	470	Alive	56.6	Low
TCGA-E2-A10E	865	Alive	57	Low
TCGA-LL-A9Q3	532	Alive	57.12	Low
TCGA-OL-A66H	812	Alive	57.13	Low
TCGA-A7-A425	447	Alive	57.77	Low
TCGA-AN-A041	7	Alive	57.77	Low
TCGA-AR-A2LQ	1233	Alive	58.03	Low
TCGA-BH-A0AZ	1919	Alive	58.46	Low
TCGA-A2-A0EY	1925	Alive	58.54	Low
TCGA-E2-A105	1308	Alive	58.65	Low
TCGA-BH-A0GZ	328	Alive	58.95	Low
TCGA-AO-A12E	2142	Alive	59.02	Low
TCGA-BH-A18G	149	Alive	59.38	Low
TCGA-EW-A1PA	575	Alive	59.43	Low
TCGA-PE-A5DD	1953	Alive	59.64	Low
TCGA-AC-A6NO	51	Alive	59.71	Low
TCGA-BH-A1EX	1508	Dead	59.73	Low
TCGA-BH-A5J0	715	Alive	59.78	Low
TCGA-D8-A1X5	565	Alive	59.78	Low
TCGA-C8-A1HO	375	Alive	59.84	Low
TCGA-C8-A132	383	Alive	59.85	Low
TCGA-AN-A04A	90	Alive	59.87	Low
TCGA-BH-A18M	2207	Dead	59.87	Low
TCGA-A8-A075	518	Alive	59.88	Low
TCGA-A8-A08O	943	Alive	59.98	Low
TCGA-BH-A0C1	1411	Dead	60.01	Low
TCGA-E2-A2P5	821	Dead	60.13	Low
TCGA-AR-A24K	1548	Alive	60.26	Low
TCGA-E2-A15H	393	Alive	60.36	Low
TCGA-E9-A295	375	Alive	60.36	Low
TCGA-GM-A2DK	2645	Alive	60.51	Low
TCGA-AR-A0U2	2551	Dead	60.78	Low
TCGA-E9-A2JT	288	Alive	60.91	Low
TCGA-BH-A0DZ	495	Alive	61.02	Low
TCGA-EW-A6SC	952	Alive	61.29	Low
TCGA-LL-A740	441	Alive	61.36	Low
TCGA-AO-A0J9	1613	Alive	61.46	Low
TCGA-E2-A1IN	675	Alive	61.58	Low
TCGA-AR-A254	2605	Alive	61.61	Low
TCGA-E9-A249	217	Alive	61.98	Low
TCGA-EW-A1IW	371	Alive	62.31	Low
TCGA-AR-A2LJ	2632	Alive	62.37	Low
TCGA-E9-A5FK	812	Alive	62.53	Low
TCGA-A8-A09D	1522	Alive	62.55	Low
TCGA-BH-A0E9	2489	Alive	62.99	Low
TCGA-AN-A0FN	218	Alive	63.05	Low
TCGA-B6-A40C	2164	Alive	63.11	Low
TCGA-S3-AA11	421	Alive	63.53	Low
TCGA-A8-A08G	607	Alive	63.55	Low
TCGA-BH-A0HB	806	Alive	63.61	Low
TCGA-A8-A076	1642	Alive	63.7	Low
TCGA-WT-AB41	1611	Alive	63.88	Low
TCGA-A2-A1G4	595	Alive	64.13	Low
TCGA-BH-A201	856	Alive	64.14	Low
TCGA-E2-A10B	1141	Alive	64.3	Low
TCGA-A8-A08S	1004	Alive	64.52	Low
TCGA-E2-A1IF	1138	Alive	64.55	Low
TCGA-A1-A0SF	1463	Alive	64.69	Low
TCGA-E2-A570	931	Alive	64.74	Low
TCGA-D8-A1Y2	433	Alive	64.84	Low
TCGA-C8-A12Z	382	Alive	64.9	Low
TCGA-BH-A0H0	461	Alive	65.13	Low
TCGA-BH-A0C0	1270	Alive	65.33	Low
TCGA-S3-AA17	424	Alive	65.49	Low
TCGA-AN-A0FF	172	Alive	65.89	Low
TCGA-A8-A06U	883	Dead	66.12	Low
TCGA-BH-A18F	1001	Alive	66.3	Low
TCGA-A8-A07F	577	Alive	66.54	Low
TCGA-AC-A62V	348	Dead	66.56	Low
TCGA-EW-A6SA	510	Alive	67.04	Low
TCGA-EW-A1J3	504	Alive	67.23	Low
TCGA-AC-A3W6	602	Alive	67.39	Low
TCGA-AR-A24P	84	Alive	67.41	High
TCGA-A8-A079	274	Alive	67.77	High
TCGA-A2-A0D1	1051	Alive	67.8	High
TCGA-E2-A10A	1229	Alive	67.89	High
TCGA-A8-A09K	912	Alive	67.91	High
TCGA-A7-A2KD	679	Alive	68.06	High
TCGA-D8-A1JJ	611	Alive	68.24	High
TCGA-C8-A3M7	1034	Dead	68.57	High
TCGA-EW-A424	715	Alive	68.6	High
TCGA-A8-A0AB	518	Alive	69.08	High
TCGA-D8-A27G	409	Alive	69.28	High
TCGA-BH-A0DD	2486	Alive	69.68	High
TCGA-A2-A0CT	2289	Alive	69.82	High
TCGA-AN-A0XR	10	Alive	69.86	High
TCGA-A8-A09C	31	Alive	69.96	High
TCGA-A7-A26J	627	Alive	70.09	High
TCGA-BH-A0HA	1611	Alive	70.51	High
TCGA-B6-A0WS	2965	Dead	70.57	High
TCGA-EW-A1OV	789	Alive	70.68	High
TCGA-A8-A07Z	1371	Alive	70.75	High
TCGA-AO-A03T	2124	Alive	71.47	High
TCGA-A8-A082	549	Alive	71.6	High
TCGA-B6-A0RH	6456	Dead	71.87	High
TCGA-EW-A1PF	439	Alive	71.97	High
TCGA-B6-A1KI	2236	Alive	72.18	High
TCGA-AO-A126	3307	Alive	72.23	High
TCGA-C8-A12Q	385	Dead	72.24	High
TCGA-D8-A1JD	552	Alive	72.51	High
TCGA-AO-A0JC	1547	Alive	72.68	High
TCGA-AN-A0XN	10	Alive	72.73	High
TCGA-AR-A2LK	1649	Dead	73.17	High
TCGA-E2-A1LB	2306	Alive	73.23	High
TCGA-AC-A3QQ	734	Alive	73.82	High
TCGA-D8-A1XM	538	Alive	73.84	High
TCGA-V7-A7HQ	2033	Alive	73.9	High
TCGA-E9-A22A	1189	Alive	74.04	High
TCGA-C8-A12O	385	Alive	74.66	High
TCGA-A2-A25E	3204	Alive	75.16	High
TCGA-BH-A0BF	1324	Dead	75.51	High
TCGA-AR-A1AP	2856	Alive	75.57	High
TCGA-BH-A0E1	477	Alive	75.62	High
TCGA-LL-A6FQ	80	Alive	75.84	High
TCGA-BH-A0W3	728	Alive	75.98	High
TCGA-LQ-A4E4	849	Alive	76.3	High
TCGA-A8-A08R	30	Alive	76.5	High
TCGA-AO-A0JB	1542	Alive	76.61	High
TCGA-A7-A0DB	1007	Alive	76.64	High
TCGA-BH-A18U	1563	Dead	76.68	High
TCGA-EW-A2FS	1604	Alive	76.75	High
TCGA-BH-A0HY	1545	Alive	76.84	High
TCGA-BH-A18J	612	Dead	77.93	High
TCGA-LL-A7SZ	594	Alive	78.05	High
TCGA-BH-A0E2	435	Alive	78.1	High
TCGA-A2-A0EU	1043	Alive	78.27	High
TCGA-PL-A8LY	8	Alive	78.27	High
TCGA-BH-A0DK	423	Alive	78.31	High
TCGA-OK-A5Q2	64	Alive	78.36	High
TCGA-A8-A08P	943	Alive	78.41	High
TCGA-EW-A1P3	1611	Alive	78.6	High
TCGA-E9-A1RA	1369	Alive	78.63	High
TCGA-AO-A0JD	2190	Alive	79.01	High
TCGA-AN-A0FL	231	Alive	79.23	High
TCGA-A8-A0A7	30	Alive	79.31	High
TCGA-AR-A0TQ	2991	Alive	79.91	High
TCGA-A8-A07B	1308	Alive	80.3	High
TCGA-C8-A12X	385	Alive	80.58	High
TCGA-A2-A0EP	3603	Alive	80.73	High
TCGA-EW-A423	533	Alive	80.85	High
TCGA-BH-A208	1759	Dead	81.05	High
TCGA-B6-A0IB	3941	Dead	81.12	High
TCGA-E2-A155	640	Alive	81.26	High
TCGA-E2-A107	1047	Alive	81.32	High
TCGA-AN-A0FV	10	Alive	81.42	High
TCGA-AR-A1AS	1150	Alive	81.49	High
TCGA-BH-AB28	287	Alive	81.71	High
TCGA-C8-A26X	376	Alive	81.76	High
TCGA-D8-A1XQ	499	Alive	81.86	High
TCGA-BH-A1FJ	1927	Dead	82.08	High
TCGA-BH-A1FU	1688	Dead	82.29	High
TCGA-A8-A085	1124	Alive	82.46	High
TCGA-E9-A1RF	200	Alive	82.6	High
TCGA-AR-A24Q	3172	Alive	82.68	High
TCGA-A8-A084	458	Alive	82.76	High
TCGA-BH-A1EW	1694	Dead	83.03	High
TCGA-AC-A62Y	530	Alive	83.23	High
TCGA-BH-A0B5	2136	Alive	83.39	High
TCGA-GM-A2DO	2596	Alive	83.66	High
TCGA-S3-A6ZF	572	Alive	83.77	High
TCGA-D8-A1JC	480	Alive	83.84	High
TCGA-AO-A0JM	2184	Alive	83.88	High
TCGA-A8-A097	365	Alive	84.23	High
TCGA-BH-A1EY	538	Dead	84.36	High
TCGA-AR-A5QP	1185	Alive	84.6	High
TCGA-A2-A0SW	1365	Dead	84.67	High
TCGA-E2-A15R	1732	Alive	84.91	High
TCGA-A8-A07L	975	Alive	85.33	High
TCGA-D8-A1Y1	302	Dead	85.4	High
TCGA-BH-A1FD	1009	Dead	85.56	High
TCGA-E2-A576	1043	Alive	85.7	High
TCGA-C8-A274	508	Alive	85.74	High
TCGA-JL-A3YX	352	Alive	86.71	High
TCGA-A8-A08J	1127	Dead	86.83	High
TCGA-BH-A0DX	2156	Alive	87.46	High
TCGA-AR-A0TT	3316	Alive	87.68	High
TCGA-A2-A0YJ	566	Alive	87.88	High
TCGA-A8-A08F	1004	Alive	87.98	High
TCGA-D8-A27H	397	Alive	87.99	High
TCGA-AR-A0TW	3009	Alive	88.02	High
TCGA-C8-A8HR	408	Alive	88.18	High
TCGA-E2-A10C	1220	Alive	89.44	High
TCGA-AR-A250	2707	Alive	90.23	High
TCGA-A8-A07E	608	Alive	90.26	High
TCGA-BH-A1FE	2273	Dead	90.5	High
TCGA-AR-A0TX	1972	Alive	90.69	High
TCGA-AC-A2BM	3022	Alive	91.08	High
TCGA-A2-A25C	523	Alive	91.09	High
TCGA-A2-A0T4	624	Alive	91.26	High
TCGA-A8-A06Y	791	Alive	91.94	High
TCGA-A2-A0EQ	2426	Alive	92.02	High
TCGA-E2-A1LS	1604	Alive	92.09	High
TCGA-EW-A6S9	463	Alive	92.16	High
TCGA-A1-A0SJ	416	Alive	92.55	High
TCGA-E9-A1R6	339	Alive	92.68	High
TCGA-BH-A0W7	1363	Alive	92.86	High
TCGA-A8-A06O	396	Alive	93.48	High
TCGA-E2-A150	1935	Alive	93.48	High
TCGA-A8-A09R	273	Alive	94.42	High
TCGA-BH-A203	1174	Dead	95	High
TCGA-E2-A14Z	563	Dead	95.07	High
TCGA-AC-A6IX	373	Alive	96.25	High
TCGA-A2-A0YT	723	Dead	96.28	High
TCGA-E9-A5UO	785	Alive	96.31	High
TCGA-E9-A22D	1248	Alive	96.42	High
TCGA-BH-A0H7	702	Alive	96.52	High
TCGA-A2-A4RW	222	Alive	96.85	High
TCGA-E2-A1IH	1026	Alive	97.12	High
TCGA-AR-A1AW	2632	Alive	97.24	High
TCGA-AC-A7VB	250	Alive	97.75	High
TCGA-OL-A5RY	752	Alive	97.86	High
TCGA-AR-A1AX	2629	Alive	98.3	High
TCGA-C8-A26W	381	Alive	98.52	High
TCGA-AO-A1KT	541	Alive	98.62	High
TCGA-E2-A1B1	2653	Alive	98.71	High
TCGA-E2-A15S	428	Alive	99.5	High
TCGA-E9-A229	1148	Alive	99.51	High
TCGA-EW-A1P1	1210	Alive	99.9	High
TCGA-BH-A1ES	3462	Dead	100	High
TCGA-A7-A0DA	1085	Alive	100.07	High
TCGA-E9-A3X8	926	Alive	100.2	High
TCGA-BH-A1F2	959	Dead	100.28	High
TCGA-LD-A9QF	323	Alive	101.32	High
TCGA-E2-A56Z	252	Alive	101.44	High
TCGA-EW-A1IZ	554	Alive	102.62	High
TCGA-B6-A0IO	5042	Alive	102.64	High
TCGA-LL-A441	996	Alive	103.28	High
TCGA-E2-A14T	2311	Alive	103.97	High
TCGA-E9-A1QZ	755	Alive	104.21	High
TCGA-BH-A6R9	160	Alive	104.64	High
TCGA-D8-A1Y0	472	Alive	104.66	High
TCGA-E2-A1IE	2362	Alive	104.89	High
TCGA-A2-A0CU	158	Dead	105	High
TCGA-A8-A07I	426	Alive	105.39	High
TCGA-BH-A0B7	2559	Alive	105.43	High
TCGA-E9-A1NE	1088	Alive	105.73	High
TCGA-A8-A09M	1006	Alive	105.98	High
TCGA-LL-A73Z	227	Dead	106.52	High
TCGA-A1-A0SM	242	Alive	106.69	High
TCGA-D8-A1J9	532	Alive	106.75	High
TCGA-BH-A0BZ	2255	Alive	108.08	High
TCGA-D8-A1XT	506	Alive	108.47	High
TCGA-C8-A3M8	394	Alive	108.53	High
TCGA-B6-A401	2596	Alive	109.13	High
TCGA-BH-A0AW	622	Alive	109.22	High
TCGA-C8-A26V	616	Alive	109.35	High
TCGA-AR-A24L	2866	Dead	109.43	High
TCGA-A2-A0YH	659	Alive	109.98	High
TCGA-C8-A8HQ	380	Alive	110	High
TCGA-AQ-A54O	1001	Alive	110.37	High
TCGA-D8-A1Y3	430	Alive	110.45	High
TCGA-BH-A0H9	1247	Alive	110.64	High
TCGA-B6-A1KN	4233	Alive	110.75	High
TCGA-A7-A4SA	454	Alive	111.98	High
TCGA-EW-A2FR	1673	Alive	112.48	High
TCGA-C8-A273	513	Alive	112.63	High
TCGA-AC-A2FM	792	Dead	113.6	High
TCGA-AO-A1KS	350	Alive	116	High
TCGA-AR-A24Z	3001	Alive	116.29	High
TCGA-BH-A18P	921	Dead	116.45	High
TCGA-D8-A27W	373	Alive	116.56	High
TCGA-S3-AA0Z	629	Alive	117.16	High
TCGA-E2-A14W	974	Alive	117.87	High
TCGA-C8-A12U	385	Alive	118.08	High
TCGA-B6-A0WV	2417	Dead	118.31	High
TCGA-D8-A1JF	366	Alive	119.72	High
TCGA-E9-A1R7	1467	Alive	119.99	High
TCGA-B6-A0IG	4456	Dead	120.47	High
TCGA-AO-A12D	2515	Alive	120.63	High
TCGA-GM-A2DN	3091	Alive	121.1	High
TCGA-E9-A6HE	847	Alive	121.17	High
TCGA-BH-A0HL	72	Alive	121.28	High
TCGA-A8-A08I	365	Alive	121.55	High
TCGA-C8-A1HM	375	Alive	121.69	High
TCGA-B6-A0I9	362	Dead	123.33	High
TCGA-BH-A0BG	1871	Alive	123.51	High
TCGA-D8-A1JA	502	Alive	123.51	High
TCGA-E9-A1R4	186	Alive	123.6	High
TCGA-D8-A1XL	606	Alive	123.62	High
TCGA-A7-A4SF	545	Alive	123.77	High
TCGA-A8-A06Q	31	Alive	124.83	High
TCGA-E2-A1LE	879	Dead	124.91	High
TCGA-A1-A0SN	1196	Alive	125.72	High
TCGA-AR-A0U0	1988	Alive	127.59	High
TCGA-BH-A1FM	1388	Dead	127.96	High
TCGA-A2-A4RX	742	Alive	128.54	High
TCGA-E9-A2JS	904	Dead	128.58	High
TCGA-B6-A0RL	2469	Dead	129.54	High
TCGA-A7-A13E	614	Dead	129.82	High
TCGA-EW-A1P7	915	Alive	130.38	High
TCGA-A2-A0SV	825	Dead	131.09	High
TCGA-E9-A1RG	647	Alive	131.7	High
TCGA-BH-A0AU	1914	Alive	131.77	High
TCGA-GI-A2C9	3342	Alive	131.91	High
TCGA-LL-A7T0	376	Alive	132.3	High
TCGA-A2-A04X	1686	Alive	133.37	High
TCGA-AC-A3TM	762	Alive	133.47	High
TCGA-BH-A209	3959	Dead	133.77	High
TCGA-D8-A142	425	Alive	133.86	High
TCGA-B6-A0IK	571	Dead	134.1	High
TCGA-A8-A09X	426	Dead	134.53	High
TCGA-B6-A0RS	3063	Dead	134.79	High
TCGA-E9-A1N6	678	Dead	136.34	High
TCGA-C8-A275	1	Alive	136.51	High
TCGA-E2-A15A	710	Alive	136.61	High
TCGA-AN-A0AJ	303	Alive	136.67	High
TCGA-BH-A1EN	2127	Dead	137.18	High
TCGA-C8-A135	393	Alive	138.25	High
TCGA-D8-A27M	410	Alive	138.55	High
TCGA-E9-A244	21	Alive	139.17	High
TCGA-A8-A09W	30	Alive	140.06	High
TCGA-AO-A03M	1866	Alive	140.32	High
TCGA-C8-A1HN	394	Alive	140.89	High
TCGA-AC-A5EH	511	Alive	142.27	High
TCGA-C8-A12Y	1476	Alive	142.78	High
TCGA-BH-A0BD	554	Alive	142.9	High
TCGA-A7-A13F	765	Alive	142.97	High
TCGA-AR-A1AT	1272	Dead	143.08	High
TCGA-BH-A202	795	Alive	143.19	High
TCGA-LL-A73Y	477	Alive	143.23	High
TCGA-OL-A66O	528	Alive	144.48	High
TCGA-E9-A22H	1232	Alive	144.49	High
TCGA-A2-A04Y	1099	Alive	145.87	High
TCGA-AC-A3W5	504	Alive	146.03	High
TCGA-A8-A06X	943	Dead	146.55	High
TCGA-AR-A2LH	616	Dead	146.69	High
TCGA-A8-A09E	1492	Alive	148.42	High
TCGA-AC-A23H	174	Dead	149.97	High
TCGA-D8-A1JK	612	Alive	151.04	High
TCGA-C8-A278	297	Alive	151.84	High
TCGA-E2-A15M	336	Dead	152.64	High
TCGA-A2-A0CL	3015	Alive	153.45	High
TCGA-A1-A0SI	635	Alive	155.09	High
TCGA-A2-A3XT	2770	Alive	157.18	High
TCGA-S3-A6ZH	641	Alive	158.41	High
TCGA-PE-A5DC	1430	Dead	160.1	High
TCGA-D8-A1J8	431	Alive	160.78	High
TCGA-AN-A0AL	227	Alive	161.84	High
TCGA-3C-AAAU	4047	Alive	163.37	High
TCGA-AN-A0G0	16	Alive	163.85	High
TCGA-E2-A14V	1042	Alive	164.15	High
TCGA-AR-A0U4	3261	Alive	164.55	High
TCGA-BH-A18K	2763	Dead	166.09	High
TCGA-OL-A66P	428	Alive	167.63	High
TCGA-A7-A0D9	1139	Alive	167.97	High
TCGA-A2-A0YG	666	Alive	170.96	High
TCGA-A8-A095	1277	Alive	171.98	High
TCGA-AR-A1AO	2618	Alive	172.48	High
TCGA-GM-A2DD	2282	Alive	173.66	High
TCGA-C8-A131	411	Alive	173.72	High
TCGA-A2-A0CY	1673	Alive	177.41	High
TCGA-AR-A0TZ	3262	Dead	178.03	High
TCGA-EW-A1J6	875	Alive	178.08	High
TCGA-3C-AALJ	1474	Alive	178.6	High
TCGA-BH-A1FN	2192	Dead	178.93	High
TCGA-E2-A1B0	1631	Alive	180.1	High
TCGA-LL-A5YM	466	Alive	180.36	High
TCGA-AO-A0J4	1587	Alive	181	High
TCGA-E2-A15F	658	Alive	182.53	High
TCGA-EW-A3U0	532	Alive	182.92	High
TCGA-BH-A42T	320	Dead	182.93	High
TCGA-AO-A03O	2483	Dead	184.28	High
TCGA-E2-A1LG	1523	Alive	184.89	High
TCGA-A2-A3XV	996	Alive	185.81	High
TCGA-E9-A247	1186	Alive	191.08	High
TCGA-A8-A09I	1371	Alive	192.43	High
TCGA-A7-A4SB	418	Alive	193.33	High
TCGA-AN-A0XW	170	Alive	194.51	High
TCGA-B6-A409	573	Dead	195.87	High
TCGA-AR-A0TP	4275	Alive	196.6	High
TCGA-D8-A1JP	639	Alive	199.81	High
TCGA-A2-A0T3	1516	Alive	200.64	High
TCGA-A8-A092	942	Alive	201.86	High
TCGA-AC-A2QH	1005	Alive	206.93	High
TCGA-A2-A0CX	1728	Alive	208.25	High
TCGA-C8-A130	370	Alive	208.35	High
TCGA-A8-A08X	1308	Alive	212.6	High
TCGA-D8-A27N	519	Alive	214.19	High
TCGA-AR-A24H	4894	Alive	214.42	High
TCGA-AC-A5XS	588	Alive	215.08	High
TCGA-BH-A18V	1556	Dead	215.1	High
TCGA-EW-A6SD	1010	Alive	216.19	High
TCGA-E9-A3HO	1158	Alive	218.82	High
TCGA-LL-A5YN	447	Alive	218.91	High
TCGA-E2-A1LL	1309	Alive	219.38	High
TCGA-BH-A0AV	1820	Alive	219.95	High
TCGA-BH-A1F8	763	Dead	220.78	High
TCGA-AN-A0AM	5	Alive	221.76	High
TCGA-AC-A2QJ	446	Dead	227.83	High
TCGA-3C-AALI	4005	Alive	227.84	High
TCGA-AR-A0TS	2558	Alive	227.9	High
TCGA-BH-A0EE	943	Alive	228.95	High
TCGA-B6-A1KF	3088	Alive	229.19	High
TCGA-A2-A4S3	666	Alive	230.23	High
TCGA-A7-A6VX	317	Alive	231.23	High
TCGA-BH-A1F0	785	Dead	231.42	High
TCGA-A2-A3XZ	1532	Alive	232.6	High
TCGA-B6-A402	2134	Alive	232.68	High
TCGA-E2-A1L7	1836	Alive	235.35	High
TCGA-E2-A14P	1246	Alive	235.48	High
TCGA-AO-A128	3248	Alive	236.63	High
TCGA-C8-A12L	363	Alive	237.44	High
TCGA-E9-A228	1285	Alive	237.7	High
TCGA-E9-A1RH	1417	Alive	239.79	High
TCGA-LL-A5YL	519	Alive	247.08	High
TCGA-AN-A0AK	224	Alive	248.95	High
TCGA-A7-A56D	448	Alive	249	High
TCGA-AN-A0FY	10	Alive	249.56	High
TCGA-AO-A12F	1842	Alive	250.11	High
TCGA-S3-AA15	525	Alive	253.34	High
TCGA-AN-A04C	54	Alive	254.66	High
TCGA-OL-A6VO	858	Alive	255.2	High
TCGA-OL-A5RZ	679	Alive	255.75	High
TCGA-BH-A0GY	923	Alive	256.99	High
TCGA-E2-A9RU	538	Alive	259.48	High
TCGA-EW-A1PD	424	Alive	262.98	High
TCGA-GM-A2DB	2406	Alive	263.98	High
TCGA-AO-A0J2	997	Alive	265.56	High
TCGA-BH-A0HU	392	Alive	277.24	High
TCGA-AN-A0XU	10	Alive	277.39	High
TCGA-A2-A3XX	1439	Dead	281.04	High
TCGA-BH-A18Q	1692	Dead	281.69	High
TCGA-A8-A07C	1034	Alive	283.24	High
TCGA-AR-A24U	3128	Alive	284.02	High
TCGA-D8-A27R	307	Alive	285.32	High
TCGA-C8-A137	379	Alive	286.78	High
TCGA-AQ-A04J	819	Alive	287.21	High
TCGA-A1-A0SO	852	Alive	288.74	High
TCGA-A2-A0T0	533	Alive	289.64	High
TCGA-E2-A1II	1025	Alive	294.06	High
TCGA-A8-A08L	304	Dead	295.05	High
TCGA-E2-A14X	972	Alive	302.81	High
TCGA-EW-A1OW	694	Alive	305.22	High
TCGA-AO-A129	3286	Alive	306.95	High
TCGA-UU-A93S	116	Dead	307.53	High
TCGA-B6-A0I2	4361	Alive	310.71	High
TCGA-JL-A3YW	360	Alive	311.6	High
TCGA-C8-A12P	358	Alive	316.77	High
TCGA-E2-A1B6	867	Alive	326.42	High
TCGA-BH-A0B3	1203	Alive	327.86	High
TCGA-C8-A1HF	332	Alive	328.78	High
TCGA-AC-A62X	417	Alive	335.17	High
TCGA-BH-A0BW	2371	Alive	336.04	High
TCGA-E9-A1RB	976	Dead	337.15	High
TCGA-BH-A0C7	2767	Alive	337.61	High
TCGA-D8-A27F	488	Alive	337.63	High
TCGA-AR-A0TY	1699	Dead	344.73	High
TCGA-AN-A0AR	10	Alive	347.67	High
TCGA-BH-A0RX	170	Alive	351.21	High
TCGA-UL-AAZ6	518	Alive	351.32	High
TCGA-A2-A04Q	2385	Alive	351.33	High
TCGA-C8-A12V	385	Alive	351.58	High
TCGA-A7-A6VV	313	Alive	357.02	High
TCGA-AO-A0JE	2335	Alive	363.08	High
TCGA-AR-A0TU	709	Alive	369.7	High
TCGA-E2-A159	762	Alive	374.68	High
TCGA-BH-A0BL	2278	Alive	376.6	High
TCGA-PL-A8LZ	302	Alive	385.61	High
TCGA-C8-A27B	439	Alive	385.8	High
TCGA-EW-A6SB	760	Alive	390.98	High
TCGA-E2-A573	1062	Alive	391.88	High
TCGA-A2-A04P	548	Dead	392.12	High
TCGA-C8-A8HP	396	Alive	393.13	High
TCGA-LL-A5YP	450	Alive	398.28	High
TCGA-B6-A0RT	2721	Alive	399.3	High
TCGA-A2-A0T2	255	Dead	402.14	High
TCGA-D8-A13Y	1728	Alive	403.38	High
TCGA-E9-A1ND	1266	Alive	407.29	High
TCGA-AR-A1AR	524	Dead	421.16	High
TCGA-GM-A2DH	2193	Alive	422.16	High
TCGA-E9-A243	612	Alive	431.27	High
TCGA-E9-A5FL	24	Alive	431.52	High
TCGA-D8-A1JL	611	Alive	436.59	High
TCGA-AC-A7VC	1	Alive	440.81	High
TCGA-B6-A0RE	7777	Alive	447.57	High
TCGA-A2-A0D2	1027	Alive	449.82	High
TCGA-BH-A5IZ	567	Alive	455.45	High
TCGA-BH-A1FC	3472	Dead	461.64	High
TCGA-D8-A13Z	635	Alive	468.29	High
TCGA-AO-A0J6	1140	Alive	468.76	High
TCGA-A1-A0SP	584	Alive	472.46	High
TCGA-E2-A158	450	Alive	472.62	High
TCGA-E2-A574	1179	Alive	474.19	High
TCGA-E2-A1LI	3121	Alive	476.56	High
TCGA-E2-A14Y	2109	Alive	476.97	High
TCGA-EW-A1P8	239	Dead	481.36	High
TCGA-BH-A0E6	293	Alive	483.64	High
TCGA-A7-A6VW	285	Alive	495.46	High
TCGA-BH-A18R	1142	Dead	502.82	High
TCGA-AN-A0FJ	242	Alive	506	High
TCGA-A7-A6VY	266	Alive	508.13	High
TCGA-E9-A1N8	1039	Alive	511.04	High
TCGA-A2-A3XU	912	Dead	516.98	High
TCGA-AR-A251	3030	Alive	519.83	High
TCGA-AN-A0AT	10	Alive	520.03	High
TCGA-A7-A4SE	644	Alive	520.29	High
TCGA-LL-A8F5	596	Alive	525.18	High
TCGA-AC-A6IW	413	Alive	525.87	High
TCGA-A2-A0SX	1534	Alive	546.88	High
TCGA-E2-A1LK	266	Dead	555.22	High
TCGA-LL-A6FR	489	Alive	556.75	High
TCGA-A7-A4SD	441	Alive	562.19	High
TCGA-B6-A0IQ	4285	Alive	571.39	High
TCGA-C8-A26Y	394	Alive	574.27	High
TCGA-AR-A256	2854	Dead	576.97	High
TCGA-A2-A0YE	554	Alive	579.85	High
TCGA-AC-A2BK	2222	Alive	581.71	High
TCGA-C8-A1HJ	5	Alive	585.43	High
TCGA-B6-A0I6	991	Dead	592.06	High
TCGA-A7-A0CE	1074	Alive	594.63	High
TCGA-BH-A0B9	1572	Alive	599.87	High
TCGA-E2-A14R	1174	Alive	609.42	High
TCGA-A2-A25F	322	Alive	610.35	High
TCGA-EW-A1P4	907	Alive	611.62	High
TCGA-HN-A2NL	79	Alive	619.94	High
TCGA-C8-A134	383	Alive	631.3	High
TCGA-AR-A2LR	1742	Alive	635.05	High
TCGA-AQ-A54N	78	Alive	638.47	High
TCGA-A2-A3XS	1032	Dead	664.48	High
TCGA-AN-A04D	52	Alive	665.42	High
TCGA-AR-A1AY	1026	Alive	687.79	High
TCGA-E9-A3QA	918	Alive	690.77	High
TCGA-A2-A0CW	3283	Alive	691.48	High
TCGA-AR-A1AH	3807	Alive	692.22	High
TCGA-D8-A1XK	441	Alive	702.74	High
TCGA-A2-A04U	2654	Alive	713.34	High
TCGA-S3-AA10	586	Alive	716.72	High
TCGA-AR-A1AQ	3021	Alive	736.05	High
TCGA-B6-A0I1	2361	Dead	745.55	High
TCGA-B6-A0IJ	7106	Alive	751.17	High
TCGA-AO-A0JL	1683	Alive	751.32	High
TCGA-AN-A0FX	10	Alive	755.34	High
TCGA-A8-A07R	273	Alive	772.51	High
TCGA-AO-A1KR	2513	Alive	800.67	High
TCGA-A2-A04T	2246	Alive	815.44	High
TCGA-E2-A14N	1434	Alive	826.45	High
TCGA-A2-A0D0	2048	Alive	829.49	High
TCGA-B6-A0X1	7455	Dead	870.77	High
TCGA-GM-A3XL	2108	Alive	890.62	High
TCGA-A7-A13D	965	Alive	892.45	High
TCGA-LL-A5YO	440	Alive	898.8	High
TCGA-AC-A8OQ	34	Alive	910.17	High
TCGA-D8-A1JG	1612	Alive	923.87	High
TCGA-A7-A26I	661	Alive	934.44	High
TCGA-OL-A5S0	620	Alive	960.08	High
TCGA-D8-A1JM	590	Alive	981.66	High
TCGA-D8-A147	584	Alive	1005.95	High
TCGA-AR-A1AI	3296	Alive	1008.17	High
TCGA-OL-A5RW	1106	Alive	1010.05	High
TCGA-EW-A1PB	608	Alive	1073.69	High
TCGA-A8-A07U	760	Alive	1083.8	High
TCGA-BH-A1F6	2965	Dead	1101.37	High
TCGA-BH-A0E0	134	Alive	1104.2	High
TCGA-B6-A400	215	Alive	1114.04	High
TCGA-OL-A66I	714	Alive	1146.79	High
TCGA-A2-A3Y0	1546	Alive	1207.36	High
TCGA-D8-A143	431	Alive	1303.21	High
TCGA-BH-A0BR	2330	Alive	1362.66	High
TCGA-E2-A1AZ	2329	Alive	1414.85	High
TCGA-A2-A3XY	1093	Dead	1504.07	High
TCGA-A2-A0ST	3017	Alive	1553.2	High
TCGA-GM-A2DF	2155	Alive	1576.31	High
TCGA-AR-A1AJ	3072	Alive	1591.15	High
TCGA-A8-A07O	304	Alive	1651.61	High
TCGA-A2-A0CM	754	Dead	1686.4	High
TCGA-EW-A1PH	607	Alive	1704.97	High
TCGA-A2-A1G1	584	Alive	1722.77	High
TCGA-E9-A22G	1239	Alive	2053.02	High
TCGA-A2-A0YM	965	Alive	2230.82	High
TCGA-S3-AA12	574	Alive	2315.55	High
TCGA-E9-A248	59	Alive	3088.38	High
TCGA-BH-A18T	224	Dead	3481.93	High
TCGA-EW-A1OY	908	Alive	5274.42	High
TCGA-EW-A1PC	187	Alive	6829.26	High
TCGA-OL-A5D7	1780	Alive	7414.17	High

## Sheet: MCM2 in BRCA
Patient	Days	Status	Expression	Group
TCGA-WT-AB44	883	Alive	159.64	Low
TCGA-E2-A1B4	1004	Dead	215.72	Low
TCGA-BH-A0BO	2197	Alive	240.09	Low
TCGA-D8-A1JU	447	Alive	242.42	Low
TCGA-BH-A0BM	1876	Alive	247.77	Low
TCGA-D8-A1XY	503	Alive	256.11	Low
TCGA-GM-A2DM	3226	Alive	259.36	Low
TCGA-E9-A1R3	78	Alive	280.81	Low
TCGA-BH-A208	1759	Dead	288.48	Low
TCGA-GM-A4E0	2191	Alive	289.32	Low
TCGA-E2-A1BC	501	Alive	300.72	Low
TCGA-EW-A1PG	1051	Alive	303.87	Low
TCGA-BH-A1EW	1694	Dead	307.69	Low
TCGA-B6-A0I8	749	Dead	316.21	Low
TCGA-AC-A2FK	2650	Alive	329.04	Low
TCGA-GM-A2D9	1812	Dead	334.06	Low
TCGA-W8-A86G	347	Alive	339.35	Low
TCGA-AR-A2LN	1161	Alive	339.87	Low
TCGA-D8-A1JN	620	Alive	339.92	Low
TCGA-GI-A2C8	225	Alive	349.06	Low
TCGA-A2-A0ES	2190	Alive	349.59	Low
TCGA-S3-AA11	421	Alive	353.18	Low
TCGA-A2-A0CZ	1616	Alive	355.24	Low
TCGA-BH-A1F5	2712	Dead	377.67	Low
TCGA-A7-A5ZX	336	Alive	378.52	Low
TCGA-B6-A1KI	2236	Alive	380.87	Low
TCGA-A2-A1G6	501	Alive	381.59	Low
TCGA-D8-A1JF	366	Alive	393.94	Low
TCGA-A8-A06Y	791	Alive	395.9	Low
TCGA-AC-A3YI	707	Alive	396.85	Low
TCGA-BH-A0DS	78	Alive	397.02	Low
TCGA-E2-A1B5	984	Alive	405.89	Low
TCGA-E9-A5FK	812	Alive	408.83	Low
TCGA-E2-A15I	1692	Alive	411.53	Low
TCGA-BH-A1ET	2520	Dead	417.85	Low
TCGA-A2-A0YI	1505	Alive	420.99	Low
TCGA-B6-A0RQ	4267	Dead	422.89	Low
TCGA-AR-A2LE	5062	Alive	423.65	Low
TCGA-E2-A1IK	1800	Alive	426.11	Low
TCGA-Z7-A8R5	3287	Alive	427.68	Low
TCGA-GM-A3NY	1162	Alive	430.5	Low
TCGA-GM-A2DC	2535	Alive	432.23	Low
TCGA-BH-A0EA	991	Dead	433.07	Low
TCGA-B6-A0X4	860	Dead	435.06	Low
TCGA-D8-A73W	385	Dead	443.14	Low
TCGA-BH-A6R9	160	Alive	445.44	Low
TCGA-D8-A1XC	377	Dead	447.3	Low
TCGA-D8-A1JB	1688	Alive	447.74	Low
TCGA-HN-A2OB	1900	Dead	447.84	Low
TCGA-D8-A1XR	482	Alive	448.03	Low
TCGA-GM-A3XG	1330	Alive	448.34	Low
TCGA-BH-A0DO	1644	Alive	448.87	Low
TCGA-E9-A1NH	576	Alive	453.49	Low
TCGA-E2-A14U	1318	Alive	455.32	Low
TCGA-AO-A12C	2372	Alive	457.6	Low
TCGA-AC-A2FO	2255	Alive	459.27	Low
TCGA-MS-A51U	681	Alive	460.09	Low
TCGA-GM-A5PX	551	Alive	461.51	Low
TCGA-GM-A5PV	412	Alive	461.75	Low
TCGA-A2-A0CO	3492	Dead	466.21	Low
TCGA-A7-A0D9	1139	Alive	467.68	Low
TCGA-EW-A1J2	403	Alive	468.77	Low
TCGA-E9-A3Q9	1001	Alive	472.58	Low
TCGA-C8-A12N	358	Alive	477.68	Low
TCGA-A2-A0EN	4088	Alive	480.17	Low
TCGA-E9-A24A	747	Alive	482.9	Low
TCGA-AC-A8OP	614	Alive	484.02	Low
TCGA-BH-A18S	2009	Dead	485.97	Low
TCGA-E9-A226	1048	Dead	486.86	Low
TCGA-AC-A2FF	2759	Alive	487.28	Low
TCGA-AO-A0JB	1542	Alive	488.37	Low
TCGA-AO-A12B	2989	Alive	488.85	Low
TCGA-AC-A8OS	70	Alive	489.9	Low
TCGA-D8-A4Z1	659	Alive	496.33	Low
TCGA-BH-A18H	652	Alive	499.48	Low
TCGA-E2-A1L9	598	Alive	499.87	Low
TCGA-AO-A1KO	622	Alive	501.51	Low
TCGA-AN-A0FN	218	Alive	502.36	Low
TCGA-E9-A22E	1269	Alive	502.43	Low
TCGA-A2-A0CQ	2695	Alive	502.72	Low
TCGA-D8-A27G	409	Alive	503.4	Low
TCGA-B6-A0I5	8556	Alive	508.99	Low
TCGA-BH-A0HO	76	Alive	509.05	Low
TCGA-BH-A0DV	2064	Alive	509.19	Low
TCGA-E2-A15D	526	Alive	510.33	Low
TCGA-AN-A0FT	214	Alive	513.14	Low
TCGA-A7-A5ZW	326	Alive	514.13	Low
TCGA-LL-A740	441	Alive	515.14	Low
TCGA-BH-A1FH	1034	Dead	517.38	Low
TCGA-AO-A0JF	1980	Alive	518.45	Low
TCGA-AO-A1KS	350	Alive	520.86	Low
TCGA-AR-A24W	1550	Alive	522.95	Low
TCGA-E2-A1IJ	865	Alive	525.37	Low
TCGA-E2-A153	707	Alive	527.25	Low
TCGA-A2-A1FV	714	Alive	530.78	Low
TCGA-BH-A0HW	1561	Alive	530.92	Low
TCGA-BH-A0H3	1928	Alive	531.14	Low
TCGA-OL-A5RU	1219	Alive	531.32	Low
TCGA-BH-A8G0	662	Alive	532.42	Low
TCGA-E2-A3DX	1325	Alive	536.77	Low
TCGA-EW-A1IY	258	Alive	536.99	Low
TCGA-5L-AAT1	1471	Alive	539.53	Low
TCGA-D8-A27K	1461	Alive	542.49	Low
TCGA-E9-A1R5	92	Alive	545.14	Low
TCGA-D8-A1XW	1309	Alive	545.63	Low
TCGA-OL-A5D6	1104	Dead	546.9	Low
TCGA-BH-A0BS	2612	Alive	548.31	Low
TCGA-E2-A15M	336	Dead	548.68	Low
TCGA-BH-A1FB	3669	Dead	548.87	Low
TCGA-BH-A0AZ	1919	Alive	549.11	Low
TCGA-OL-A66L	1301	Alive	549.45	Low
TCGA-BH-A1EU	1286	Dead	550.43	Low
TCGA-AR-A2LQ	1233	Alive	551.8	Low
TCGA-AN-A0AS	10	Alive	554.18	Low
TCGA-E2-A1L8	2240	Alive	556.08	Low
TCGA-AR-A0TR	160	Dead	557	Low
TCGA-BH-A0BP	2296	Dead	559.18	Low
TCGA-A7-A13G	718	Alive	559.36	Low
TCGA-C8-A3M7	1034	Dead	560.04	Low
TCGA-A8-A0A6	640	Alive	560.18	Low
TCGA-D8-A73U	492	Alive	561.1	Low
TCGA-BH-A2L8	612	Alive	561.39	Low
TCGA-A2-A0EW	1884	Dead	561.81	Low
TCGA-EW-A1P1	1210	Alive	562.37	Low
TCGA-EW-A3E8	1035	Alive	562.47	Low
TCGA-A2-A0T6	575	Alive	562.58	Low
TCGA-A2-A4S0	706	Alive	562.93	Low
TCGA-A2-A0YD	769	Alive	563.33	Low
TCGA-A8-A09A	304	Alive	563.66	Low
TCGA-BH-A0DT	2403	Alive	563.81	Low
TCGA-A2-A259	1596	Alive	566.42	Low
TCGA-E2-A572	1208	Alive	568.79	Low
TCGA-E2-A14Q	1163	Alive	571.86	Low
TCGA-D8-A141	626	Alive	575.56	Low
TCGA-AN-A0XP	9	Alive	576.85	Low
TCGA-A8-A0A2	579	Alive	577.29	Low
TCGA-B6-A0IH	3418	Dead	578.81	Low
TCGA-LL-A5YL	519	Alive	578.85	Low
TCGA-BH-A0HI	620	Alive	579.16	Low
TCGA-GM-A3XN	2019	Alive	580.55	Low
TCGA-E9-A1RH	1417	Alive	581.4	Low
TCGA-A2-A0EO	2442	Alive	581.42	Low
TCGA-E9-A1RD	34	Alive	581.98	Low
TCGA-E2-A10C	1220	Alive	582.78	Low
TCGA-BH-A0BR	2330	Alive	582.83	Low
TCGA-AR-A1AM	2991	Alive	583.87	Low
TCGA-LL-A440	759	Alive	585.05	Low
TCGA-D8-A3Z6	563	Alive	585.52	Low
TCGA-D8-A146	643	Alive	585.97	Low
TCGA-BH-A28O	1120	Alive	586.92	Low
TCGA-BH-A18K	2763	Dead	588.93	Low
TCGA-E2-A1L6	1648	Alive	590.88	Low
TCGA-BH-A42U	3364	Alive	591.02	Low
TCGA-AC-A3QP	675	Alive	591.13	Low
TCGA-D8-A1JH	426	Alive	591.86	Low
TCGA-E9-A3X8	926	Alive	594.34	Low
TCGA-BH-A0DE	2372	Alive	595.27	Low
TCGA-A2-A0CP	2813	Alive	596.51	Low
TCGA-LL-A9Q3	532	Alive	599.53	Low
TCGA-AO-A12A	3112	Alive	600.14	Low
TCGA-A8-A099	304	Alive	600.21	Low
TCGA-OL-A5RX	878	Alive	602.55	Low
TCGA-A7-A3RF	408	Alive	605.83	Low
TCGA-BH-A0HK	178	Alive	606.43	Low
TCGA-C8-A138	380	Alive	607.17	Low
TCGA-E2-A1LS	1604	Alive	608.61	Low
TCGA-AO-A0JL	1683	Alive	610.71	Low
TCGA-A2-A25C	523	Alive	612.7	Low
TCGA-E2-A1IL	118	Alive	614.47	Low
TCGA-AQ-A1H2	475	Alive	616.41	Low
TCGA-BH-A42V	635	Alive	616.5	Low
TCGA-D8-A27P	49	Alive	617.02	Low
TCGA-BH-A1FG	3736	Dead	620.17	Low
TCGA-E9-A54X	727	Alive	620.66	Low
TCGA-LD-A9QF	323	Alive	621.15	Low
TCGA-AQ-A54O	1001	Alive	623.41	Low
TCGA-D8-A1XO	1682	Alive	628.42	Low
TCGA-AC-A23E	698	Alive	629.78	Low
TCGA-BH-A0HN	516	Alive	631.42	Low
TCGA-BH-A0E7	1363	Alive	634.45	Low
TCGA-WT-AB41	1611	Alive	636.44	Low
TCGA-E2-A570	931	Alive	637.24	Low
TCGA-BH-A1EY	538	Dead	637.29	Low
TCGA-AR-A1AL	2971	Alive	642.25	Low
TCGA-BH-A1EX	1508	Dead	642.63	Low
TCGA-GM-A2DK	2645	Alive	643.72	Low
TCGA-GM-A2DA	6593	Dead	647.12	Low
TCGA-A2-A3KD	1206	Alive	650.17	Low
TCGA-E9-A227	975	Alive	654.96	Low
TCGA-BH-A0BT	2365	Alive	655.74	Low
TCGA-AR-A5QM	2231	Alive	657.98	Low
TCGA-C8-A1HI	343	Alive	658.39	Low
TCGA-D8-A1XV	461	Alive	660.48	Low
TCGA-E2-A15J	1640	Alive	661.13	Low
TCGA-AC-A2FE	2636	Dead	661.25	Low
TCGA-AO-A03N	2031	Alive	661.49	Low
TCGA-C8-A1HE	375	Alive	662.34	Low
TCGA-AO-A126	3307	Alive	663.51	Low
TCGA-D8-A3Z5	1015	Alive	665.53	Low
TCGA-A2-A4RW	222	Alive	665.86	Low
TCGA-B6-A0RO	4929	Alive	668.11	Low
TCGA-A8-A06U	883	Dead	671.72	Low
TCGA-D8-A1J8	431	Alive	672.42	Low
TCGA-OL-A6VQ	600	Alive	672.77	Low
TCGA-A7-A26E	954	Alive	673.75	Low
TCGA-A8-A08C	881	Alive	675.58	Low
TCGA-A2-A0D3	1873	Alive	676.77	Low
TCGA-A2-A4RY	648	Alive	677.17	Low
TCGA-AN-A0XV	162	Alive	678.87	Low
TCGA-A2-A4S2	643	Alive	680.04	Low
TCGA-D8-A1JI	577	Alive	682.47	Low
TCGA-OL-A5RV	1062	Alive	683.79	Low
TCGA-E9-A295	375	Alive	684.78	Low
TCGA-AC-A3TN	456	Alive	685.41	Low
TCGA-A2-A4S1	820	Alive	685.78	Low
TCGA-A2-A04N	4354	Alive	686.21	Low
TCGA-A2-A04Y	1099	Alive	686.52	Low
TCGA-B6-A0WZ	6292	Alive	687	Low
TCGA-EW-A1J1	575	Alive	688.8	Low
TCGA-AO-A0J9	1613	Alive	689.05	Low
TCGA-D8-A27V	381	Alive	689.81	Low
TCGA-GM-A3NW	3361	Alive	690.69	Low
TCGA-E2-A15P	595	Alive	690.88	Low
TCGA-EW-A1J6	875	Alive	691.43	Low
TCGA-A2-A3XV	996	Alive	696.34	Low
TCGA-BH-A0HP	414	Alive	696.49	Low
TCGA-AN-A03X	10	Alive	696.54	Low
TCGA-B6-A0RN	8008	Alive	697.87	Low
TCGA-GI-A2C9	3342	Alive	698.61	Low
TCGA-A2-A0CV	3011	Alive	699.7	Low
TCGA-AN-A0XT	10	Alive	702.33	Low
TCGA-BH-A0HQ	1121	Alive	704.05	Low
TCGA-AC-A2QI	588	Alive	705.64	Low
TCGA-D8-A1X8	783	Alive	709.16	Low
TCGA-EW-A1PE	320	Alive	711.12	Low
TCGA-OL-A66J	1996	Alive	713.84	Low
TCGA-AN-A0XS	10	Alive	714.67	Low
TCGA-BH-A0BJ	660	Alive	715.86	Low
TCGA-E9-A1NG	786	Dead	716.2	Low
TCGA-E9-A1R7	1467	Alive	717.8	Low
TCGA-AO-A0JA	655	Alive	718.09	Low
TCGA-E2-A1IF	1138	Alive	721.12	Low
TCGA-BH-A0EB	745	Alive	723.08	Low
TCGA-BH-A201	856	Alive	723.28	Low
TCGA-AQ-A0Y5	172	Dead	726.5	Low
TCGA-D8-A1JA	502	Alive	727.79	Low
TCGA-OL-A66K	1275	Dead	727.8	Low
TCGA-EW-A2FS	1604	Alive	728.22	Low
TCGA-D8-A1XU	395	Alive	729.15	Low
TCGA-BH-A1EN	2127	Dead	732.25	Low
TCGA-E2-A1LB	2306	Alive	733.24	Low
TCGA-BH-A0BQ	2255	Alive	734.05	Low
TCGA-BH-A0DP	476	Alive	734.68	Low
TCGA-A7-A4SC	446	Alive	737.07	Low
TCGA-E9-A245	26	Alive	737.47	Low
TCGA-A1-A0SH	1437	Alive	737.83	Low
TCGA-A8-A07F	577	Alive	744.34	Low
TCGA-AC-A23G	2248	Alive	744.91	Low
TCGA-BH-A1F2	959	Dead	745.04	Low
TCGA-AN-A046	10	Alive	745.93	Low
TCGA-LL-A50Y	762	Alive	749.21	Low
TCGA-A2-A0YK	588	Alive	749.88	Low
TCGA-A7-A0CH	1079	Alive	751.45	Low
TCGA-AC-A2FB	1234	Alive	753.71	Low
TCGA-AO-A0JC	1547	Alive	754.82	Low
TCGA-EW-A423	533	Alive	756.22	Low
TCGA-BH-A0DI	912	Alive	756.47	Low
TCGA-AC-A8OR	40	Alive	761.36	Low
TCGA-BH-A0H6	747	Alive	762.37	Low
TCGA-A8-A06P	396	Alive	763.05	Low
TCGA-BH-A0HA	1611	Alive	765.39	Low
TCGA-OL-A66N	792	Alive	766.86	Low
TCGA-AO-A0J8	680	Alive	770.09	Low
TCGA-AC-A3BB	987	Alive	771.33	Low
TCGA-E2-A106	2541	Alive	771.46	Low
TCGA-BH-A8FZ	574	Alive	774.13	Low
TCGA-E2-A150	1935	Alive	774.18	Low
TCGA-AR-A2LM	1935	Alive	775.47	Low
TCGA-E2-A1B1	2653	Alive	776.39	Low
TCGA-AC-A6IX	373	Alive	777.69	Low
TCGA-A2-A25A	3276	Alive	779.44	Low
TCGA-BH-A0W4	759	Alive	780.09	Low
TCGA-D8-A27L	499	Alive	780.67	Low
TCGA-A2-A0YC	990	Alive	781.04	Low
TCGA-A1-A0SD	437	Alive	781.41	Low
TCGA-C8-A26Z	470	Alive	784.37	Low
TCGA-BH-A1FU	1688	Dead	785.62	Low
TCGA-A8-A08Z	1217	Alive	787.86	Low
TCGA-A2-A0EP	3603	Alive	788.37	Low
TCGA-BH-A28Q	1119	Alive	788.78	Low
TCGA-GM-A2DD	2282	Alive	789.08	Low
TCGA-D8-A27N	519	Alive	789.54	Low
TCGA-OL-A5DA	1783	Alive	794.87	Low
TCGA-A7-A3IY	345	Alive	796.05	Low
TCGA-BH-A18G	149	Alive	796.25	Low
TCGA-BH-A203	1174	Dead	797.63	Low
TCGA-AQ-A7U7	584	Dead	798.77	Low
TCGA-AR-A24T	3202	Alive	799.74	Low
TCGA-AC-A2B8	677	Alive	803.73	Low
TCGA-BH-A6R8	293	Alive	805.17	Low
TCGA-BH-A8FY	295	Dead	808.21	Low
TCGA-GM-A2DI	2590	Alive	808.54	Low
TCGA-D8-A1XG	448	Alive	809.91	Low
TCGA-E2-A1LH	3247	Alive	811.11	Low
TCGA-A7-A26J	627	Alive	811.48	Low
TCGA-E2-A14W	974	Alive	813.13	Low
TCGA-AO-A12D	2515	Alive	814.13	Low
TCGA-B6-A0WY	3461	Dead	817.22	Low
TCGA-AC-A62Y	530	Alive	818.29	Low
TCGA-E2-A156	726	Alive	818.38	Low
TCGA-A2-A0EX	752	Alive	819.18	Low
TCGA-AN-A0XN	10	Alive	820.42	Low
TCGA-AC-A3W7	471	Alive	820.5	Low
TCGA-A7-A3J0	313	Alive	822.36	Low
TCGA-A2-A0CS	2348	Dead	823.26	Low
TCGA-BH-A0H5	1620	Alive	824.89	Low
TCGA-A8-A08O	943	Alive	825.16	Low
TCGA-E2-A108	837	Alive	827.87	Low
TCGA-AR-A252	2838	Alive	828.74	Low
TCGA-E9-A229	1148	Alive	829.03	Low
TCGA-AC-A2FG	1853	Alive	830.79	Low
TCGA-AO-A03T	2124	Alive	831.47	Low
TCGA-BH-A1F0	785	Dead	834.07	Low
TCGA-BH-A18M	2207	Dead	836	Low
TCGA-A8-A07J	365	Alive	837.26	Low
TCGA-BH-A0W5	1288	Alive	837.63	Low
TCGA-AN-A0XL	163	Alive	838.36	Low
TCGA-PL-A8LX	5	Alive	839.43	Low
TCGA-E2-A1IN	675	Alive	839.78	Low
TCGA-BH-A18P	921	Dead	847.02	Low
TCGA-BH-A0E9	2489	Alive	847.21	Low
TCGA-A7-A13H	899	Alive	848.49	Low
TCGA-OL-A66P	428	Alive	848.92	Low
TCGA-E2-A10E	865	Alive	854.06	Low
TCGA-LD-A66U	646	Alive	856.93	Low
TCGA-E2-A15E	630	Alive	862.35	Low
TCGA-E2-A15C	694	Alive	864.8	Low
TCGA-C8-A1HK	366	Alive	867.72	Low
TCGA-OL-A66H	812	Alive	874.06	Low
TCGA-E2-A56Z	252	Alive	874.66	Low
TCGA-D8-A27I	439	Alive	877.59	Low
TCGA-AC-A3HN	496	Alive	878.27	Low
TCGA-LL-A73Z	227	Dead	881.54	Low
TCGA-BH-A0B0	2477	Alive	882.69	Low
TCGA-E2-A1IU	337	Alive	883.04	Low
TCGA-A2-A0EV	968	Alive	883.51	Low
TCGA-A1-A0SJ	416	Alive	884.13	Low
TCGA-A1-A0SM	242	Alive	885.1	Low
TCGA-A8-A09V	457	Alive	886.99	Low
TCGA-AN-A0FZ	10	Alive	887.66	Low
TCGA-BH-A0AY	777	Alive	890.05	Low
TCGA-A7-A0DB	1007	Alive	897.4	Low
TCGA-E9-A1ND	1266	Alive	898.55	Low
TCGA-AC-A5XU	455	Alive	899.3	Low
TCGA-EW-A1J3	504	Alive	899.37	Low
TCGA-AC-A5XS	588	Alive	902.15	Low
TCGA-E9-A1R2	1063	Alive	902.94	Low
TCGA-EW-A1P3	1611	Alive	905.24	Low
TCGA-A8-A0A7	30	Alive	905.77	Low
TCGA-C8-A12O	385	Alive	909.47	Low
TCGA-EW-A1P5	703	Alive	909.49	Low
TCGA-A8-A08T	3409	Dead	911.15	Low
TCGA-A8-A091	1004	Alive	912.36	Low
TCGA-A7-A426	364	Alive	912.37	Low
TCGA-BH-A0GY	923	Alive	913.44	Low
TCGA-E9-A1RA	1369	Alive	919.02	Low
TCGA-BH-A0B7	2559	Alive	921.01	Low
TCGA-EW-A424	715	Alive	934.51	Low
TCGA-BH-A0BF	1324	Dead	934.99	Low
TCGA-5L-AAT0	1477	Alive	935.03	Low
TCGA-AO-A1KP	2953	Alive	935.36	Low
TCGA-B6-A0RG	2082	Alive	936	Low
TCGA-A8-A08A	30	Alive	937.82	Low
TCGA-D8-A1XB	552	Alive	940.1	Low
TCGA-LL-A73Y	477	Alive	941.56	Low
TCGA-A8-A09D	1522	Alive	943.06	Low
TCGA-EW-A1PF	439	Alive	943.14	Low
TCGA-XX-A899	467	Alive	944.09	Low
TCGA-A2-A0ET	1066	Alive	944.2	Low
TCGA-AC-A23C	585	Alive	944.2	Low
TCGA-B6-A401	2596	Alive	944.92	Low
TCGA-A7-A0DC	906	Alive	946.99	Low
TCGA-A7-A4SB	418	Alive	951.18	Low
TCGA-A7-A3J1	343	Alive	952.71	Low
TCGA-AR-A1AO	2618	Alive	953.43	Low
TCGA-V7-A7HQ	2033	Alive	954.55	Low
TCGA-AC-A3W6	602	Alive	954.79	Low
TCGA-AQ-A1H3	989	Alive	955.47	Low
TCGA-E9-A1NE	1088	Alive	955.55	Low
TCGA-XX-A89A	488	Alive	956.54	Low
TCGA-A8-A09R	273	Alive	956.89	Low
TCGA-D8-A145	410	Alive	961.26	Low
TCGA-AN-A0XW	170	Alive	962.46	Low
TCGA-A8-A0A1	365	Alive	965.36	Low
TCGA-AR-A24V	3203	Alive	966.96	Low
TCGA-A2-A3KC	1102	Alive	967.16	Low
TCGA-AQ-A04L	3957	Alive	969.92	Low
TCGA-AC-A3W5	504	Alive	970.38	Low
TCGA-AR-A1AV	1864	Alive	970.47	Low
TCGA-AC-A6IV	568	Alive	971.16	Low
TCGA-C8-A274	508	Alive	972.2	Low
TCGA-AR-A24U	3128	Alive	974.2	Low
TCGA-E2-A1IG	2140	Alive	977.26	Low
TCGA-AR-A1AU	2868	Alive	983.99	Low
TCGA-AR-A1AK	3159	Alive	985.77	Low
TCGA-BH-A0C1	1411	Dead	985.9	Low
TCGA-BH-A0B6	2483	Alive	986.24	Low
TCGA-B6-A0RI	7126	Alive	986.78	Low
TCGA-AR-A250	2707	Alive	991.72	Low
TCGA-E9-A1R4	186	Alive	993.53	Low
TCGA-B6-A0IO	5042	Alive	995.48	Low
TCGA-E9-A1R0	860	Alive	998.37	Low
TCGA-A2-A0YL	1474	Alive	999.12	Low
TCGA-A8-A08P	943	Alive	999.2	Low
TCGA-A8-A09X	426	Dead	999.28	Low
TCGA-BH-A0DX	2156	Alive	999.63	Low
TCGA-LL-A5YN	447	Alive	1000	Low
TCGA-E2-A574	1179	Alive	1000.56	Low
TCGA-B6-A0WW	558	Dead	1000.57	Low
TCGA-AO-A03V	1351	Alive	1001.96	Low
TCGA-BH-A0DG	2041	Alive	1003.07	Low
TCGA-BH-A0HF	727	Alive	1004.55	Low
TCGA-E2-A2P6	1051	Alive	1004.73	Low
TCGA-E2-A15O	1545	Alive	1008.76	Low
TCGA-AR-A24L	2866	Dead	1009.66	Low
TCGA-E2-A1BD	1133	Alive	1010.57	Low
TCGA-E2-A1IH	1026	Alive	1011.57	Low
TCGA-BH-A1FM	1388	Dead	1013.87	Low
TCGA-E2-A1IO	1855	Alive	1014.83	Low
TCGA-EW-A2FR	1673	Alive	1016.5	Low
TCGA-BH-A0HL	72	Alive	1017.11	Low
TCGA-LL-A6FP	677	Alive	1017.14	Low
TCGA-AR-A0TW	3009	Alive	1018.15	Low
TCGA-E2-A1LA	748	Alive	1019.14	Low
TCGA-AR-A1AN	2920	Alive	1019.4	Low
TCGA-S3-AA14	529	Alive	1019.4	Low
TCGA-E2-A10F	878	Alive	1020.07	Low
TCGA-AN-A0FK	213	Alive	1021.31	Low
TCGA-LL-A6FQ	80	Alive	1024.02	Low
TCGA-AR-A0TX	1972	Alive	1024.37	Low
TCGA-D8-A1XM	538	Alive	1025.05	Low
TCGA-3C-AALK	1448	Alive	1026.07	Low
TCGA-A2-A0YF	1535	Alive	1026.3	Low
TCGA-OL-A6VR	1220	Alive	1028.29	Low
TCGA-E2-A14T	2311	Alive	1031.03	Low
TCGA-LD-A7W5	216	Alive	1031.74	Low
TCGA-AN-A0FF	172	Alive	1032.48	Low
TCGA-BH-A0DQ	98	Alive	1033.51	Low
TCGA-AN-A0FS	210	Alive	1036.24	Low
TCGA-BH-A18I	1093	Alive	1038.87	Low
TCGA-A2-A04V	1920	Dead	1046.24	Low
TCGA-A8-A07G	577	Alive	1047.05	Low
TCGA-E9-A249	217	Alive	1048.59	Low
TCGA-C8-A1HG	345	Alive	1050.59	Low
TCGA-AO-A1KQ	1882	Alive	1052.81	Low
TCGA-B6-A409	573	Dead	1055.64	Low
TCGA-C8-A26V	616	Alive	1056.79	Low
TCGA-JL-A3YW	360	Alive	1059.08	Low
TCGA-AR-A2LJ	2632	Alive	1060.36	Low
TCGA-EW-A1OX	911	Alive	1060.45	Low
TCGA-E2-A14S	1009	Alive	1062.9	Low
TCGA-E2-A152	2128	Alive	1063.82	Low
TCGA-A2-A1G1	584	Alive	1065.77	Low
TCGA-GM-A2DO	2596	Alive	1065.94	Low
TCGA-A8-A07P	334	Alive	1066.34	Low
TCGA-A2-A3XW	1712	Alive	1067.33	Low
TCGA-EW-A1J5	477	Alive	1068.95	Low
TCGA-A2-A0CK	4159	Alive	1070.71	Low
TCGA-A2-A0T2	255	Dead	1072.22	Low
TCGA-D8-A27T	398	Alive	1075.87	Low
TCGA-AR-A0U0	1988	Alive	1077.1	Low
TCGA-BH-A0BG	1871	Alive	1077.33	Low
TCGA-BH-A1FL	1673	Dead	1080.15	Low
TCGA-A8-A0A9	822	Alive	1081.14	Low
TCGA-A8-A06R	547	Alive	1082.14	Low
TCGA-AN-A0XO	375	Alive	1082.23	Low
TCGA-A2-A3XZ	1532	Alive	1088.9	Low
TCGA-A2-A25E	3204	Alive	1091.19	Low
TCGA-BH-A0E6	293	Alive	1092.99	Low
TCGA-A8-A09C	31	Alive	1096.46	Low
TCGA-AO-A0JM	2184	Alive	1100.22	Low
TCGA-A8-A06T	1614	Alive	1100.66	Low
TCGA-AR-A0TT	3316	Alive	1100.73	Low
TCGA-GM-A2DF	2155	Alive	1101.41	Low
TCGA-BH-A0E2	435	Alive	1104.4	Low
TCGA-BH-A0EI	1926	Alive	1107.76	Low
TCGA-E9-A2JT	288	Alive	1109.07	Low
TCGA-AR-A5QN	1013	Alive	1109.97	Low
TCGA-D8-A1JG	1612	Alive	1116.1	Low
TCGA-A1-A0SF	1463	Alive	1118.99	Low
TCGA-BH-A0W7	1363	Alive	1119.65	Low
TCGA-3C-AALJ	1474	Alive	1119.67	Low
TCGA-E2-A15F	658	Alive	1119.68	Low
TCGA-A2-A0SU	1662	Alive	1120.1	Low
TCGA-BH-A0B4	1191	Alive	1122.49	Low
TCGA-D8-A1JE	575	Alive	1127.42	Low
TCGA-A8-A093	546	Alive	1128.6	Low
TCGA-C8-A12M	358	Alive	1130.26	Low
TCGA-BH-A18N	1148	Dead	1133.84	Low
TCGA-BH-A0AW	622	Alive	1135.82	Low
TCGA-C8-A131	411	Alive	1141.48	Low
TCGA-AR-A1AW	2632	Alive	1142.26	Low
TCGA-E2-A15L	626	Alive	1143.95	Low
TCGA-B6-A40B	3152	Alive	1146.39	High
TCGA-AR-A24S	2976	Alive	1147.27	High
TCGA-AC-A3EH	197	Dead	1148.58	High
TCGA-GM-A2DB	2406	Alive	1154.36	High
TCGA-AO-A0JI	1528	Alive	1159.79	High
TCGA-PE-A5DE	2645	Alive	1161	High
TCGA-A8-A07B	1308	Alive	1161.45	High
TCGA-E2-A10B	1141	Alive	1161.59	High
TCGA-E9-A1RE	1419	Alive	1162.78	High
TCGA-A2-A0SY	1347	Alive	1163.41	High
TCGA-D8-A140	403	Alive	1164.05	High
TCGA-B6-A40C	2164	Alive	1164.77	High
TCGA-BH-A0H9	1247	Alive	1165.09	High
TCGA-PE-A5DD	1953	Alive	1167	High
TCGA-A7-A425	447	Alive	1167.2	High
TCGA-B6-A0RH	6456	Dead	1170.56	High
TCGA-AN-A0FD	196	Alive	1171.21	High
TCGA-D8-A1Y1	302	Dead	1179.59	High
TCGA-A2-A0CR	3283	Alive	1181.59	High
TCGA-A8-A08X	1308	Alive	1184.3	High
TCGA-E9-A2JS	904	Dead	1185.8	High
TCGA-A8-A09T	579	Alive	1187.89	High
TCGA-C8-A12Q	385	Dead	1189.34	High
TCGA-A2-A0T5	531	Alive	1189.39	High
TCGA-BH-A0E1	477	Alive	1191.35	High
TCGA-A7-A4SA	454	Alive	1193.77	High
TCGA-B6-A0IP	3926	Dead	1196.9	High
TCGA-A2-A0EU	1043	Alive	1197.16	High
TCGA-EW-A6SC	952	Alive	1203.61	High
TCGA-BH-A0GZ	328	Alive	1203.92	High
TCGA-AO-A03P	2911	Dead	1208.45	High
TCGA-C8-A26X	376	Alive	1209.92	High
TCGA-AN-A0FL	231	Alive	1213.73	High
TCGA-JL-A3YX	352	Alive	1214.31	High
TCGA-BH-A5J0	715	Alive	1214.55	High
TCGA-A7-A26I	661	Alive	1215.49	High
TCGA-S3-AA12	574	Alive	1215.59	High
TCGA-B6-A0WT	5739	Alive	1216.28	High
TCGA-S3-AA17	424	Alive	1216.52	High
TCGA-E2-A576	1043	Alive	1216.77	High
TCGA-BH-A0BV	1519	Alive	1217.57	High
TCGA-E9-A22A	1189	Alive	1217.99	High
TCGA-PL-A8LY	8	Alive	1222.22	High
TCGA-E9-A248	59	Alive	1225.64	High
TCGA-D8-A142	425	Alive	1231.08	High
TCGA-D8-A1XD	522	Alive	1231.88	High
TCGA-A8-A08G	607	Alive	1234.68	High
TCGA-EW-A1IZ	554	Alive	1235.7	High
TCGA-A2-A0EM	3094	Alive	1236.15	High
TCGA-E9-A247	1186	Alive	1237.99	High
TCGA-AR-A2LH	616	Dead	1240.27	High
TCGA-D8-A27M	410	Alive	1240.46	High
TCGA-BH-A18J	612	Dead	1245.14	High
TCGA-A2-A0CU	158	Dead	1245.9	High
TCGA-C8-A12Z	382	Alive	1245.97	High
TCGA-EW-A1P7	915	Alive	1250.83	High
TCGA-AR-A1AX	2629	Alive	1257.85	High
TCGA-E9-A244	21	Alive	1263.64	High
TCGA-A2-A25B	1291	Alive	1263.79	High
TCGA-OK-A5Q2	64	Alive	1265.12	High
TCGA-4H-AAAK	348	Alive	1265.53	High
TCGA-A2-A3XY	1093	Dead	1270.81	High
TCGA-AC-A3TM	762	Alive	1273.01	High
TCGA-EW-A1P6	562	Alive	1281.65	High
TCGA-A2-A0ST	3017	Alive	1283.29	High
TCGA-A2-A0ER	2263	Alive	1283.48	High
TCGA-A7-A2KD	679	Alive	1286.45	High
TCGA-AC-A6NO	51	Alive	1295.37	High
TCGA-AR-A24P	84	Alive	1296.4	High
TCGA-AC-A5EH	511	Alive	1296.49	High
TCGA-A2-A1FW	528	Alive	1297.23	High
TCGA-C8-A135	393	Alive	1298.16	High
TCGA-B6-A1KC	1326	Alive	1298.19	High
TCGA-BH-A1FE	2273	Dead	1301.19	High
TCGA-E9-A22D	1248	Alive	1301.62	High
TCGA-A8-A09B	365	Alive	1304.04	High
TCGA-BH-A1F8	763	Dead	1306.42	High
TCGA-B6-A0X1	7455	Dead	1306.7	High
TCGA-LL-A441	996	Alive	1307.09	High
TCGA-A2-A0CY	1673	Alive	1310.62	High
TCGA-E2-A1B0	1631	Alive	1313.78	High
TCGA-C8-A132	383	Alive	1315.44	High
TCGA-C8-A275	1	Alive	1318.62	High
TCGA-AC-A2FM	792	Dead	1322.42	High
TCGA-E9-A54Y	725	Alive	1323.46	High
TCGA-AR-A1AH	3807	Alive	1324.74	High
TCGA-BH-A18L	811	Dead	1332.08	High
TCGA-A2-A0D1	1051	Alive	1336.79	High
TCGA-BH-A1F6	2965	Dead	1337.11	High
TCGA-BH-A0HX	829	Alive	1339.43	High
TCGA-C8-A12L	363	Alive	1341.91	High
TCGA-OL-A5RY	752	Alive	1343.02	High
TCGA-D8-A27H	397	Alive	1345.54	High
TCGA-B6-A0WS	2965	Dead	1346.69	High
TCGA-OL-A5D8	973	Alive	1351.53	High
TCGA-LQ-A4E4	849	Alive	1352.03	High
TCGA-AR-A1AP	2856	Alive	1352.23	High
TCGA-C8-A1HO	375	Alive	1352.25	High
TCGA-E9-A1QZ	755	Alive	1354.1	High
TCGA-AR-A24N	3035	Alive	1354.11	High
TCGA-E2-A1LK	266	Dead	1355.77	High
TCGA-EW-A1PA	575	Alive	1358.52	High
TCGA-BH-A0BZ	2255	Alive	1358.59	High
TCGA-A1-A0SQ	554	Alive	1359.56	High
TCGA-AN-A0AR	10	Alive	1359.66	High
TCGA-BH-A0DZ	495	Alive	1361.86	High
TCGA-BH-A0C0	1270	Alive	1362.27	High
TCGA-A8-A06Q	31	Alive	1364.01	High
TCGA-AR-A5QP	1185	Alive	1364.07	High
TCGA-BH-A0DK	423	Alive	1365.44	High
TCGA-AO-A0JJ	1887	Alive	1368.74	High
TCGA-GM-A2DL	3519	Alive	1369.82	High
TCGA-A2-A25F	322	Alive	1371.88	High
TCGA-EW-A6S9	463	Alive	1372.47	High
TCGA-A8-A09K	912	Alive	1372.98	High
TCGA-AR-A2LL	2012	Alive	1375.81	High
TCGA-EW-A1PH	607	Alive	1377.52	High
TCGA-A2-A04P	548	Dead	1379.15	High
TCGA-A7-A0DA	1085	Alive	1381.53	High
TCGA-AO-A12E	2142	Alive	1383.61	High
TCGA-A2-A0YJ	566	Alive	1386.49	High
TCGA-E2-A105	1308	Alive	1391.35	High
TCGA-AC-A3OD	451	Alive	1391.48	High
TCGA-A2-A1FZ	683	Alive	1392.22	High
TCGA-C8-A12X	385	Alive	1394.96	High
TCGA-A2-A0T7	631	Alive	1401.89	High
TCGA-D8-A1XA	839	Alive	1402.43	High
TCGA-AR-A24Z	3001	Alive	1407.81	High
TCGA-A8-A08S	1004	Alive	1408.06	High
TCGA-A2-A0EY	1925	Alive	1409.07	High
TCGA-A8-A09M	1006	Alive	1409.09	High
TCGA-D8-A27R	307	Alive	1409.91	High
TCGA-BH-A1FD	1009	Dead	1410.38	High
TCGA-E2-A14O	1359	Alive	1411.22	High
TCGA-C8-A8HQ	380	Alive	1411.38	High
TCGA-AR-A24R	3430	Alive	1412.52	High
TCGA-C8-A12Y	1476	Alive	1418.94	High
TCGA-GM-A2DN	3091	Alive	1425.38	High
TCGA-BH-A0AU	1914	Alive	1426.44	High
TCGA-BH-A18F	1001	Alive	1426.83	High
TCGA-BH-A0B8	1569	Alive	1427.1	High
TCGA-B6-A0RS	3063	Dead	1427.71	High
TCGA-EW-A6SB	760	Alive	1430.45	High
TCGA-D8-A1X9	727	Alive	1441.51	High
TCGA-A7-A13E	614	Dead	1441.66	High
TCGA-E2-A1LE	879	Dead	1445.96	High
TCGA-E2-A2P5	821	Dead	1446.55	High
TCGA-BH-A1ES	3462	Dead	1448.36	High
TCGA-A7-A26H	724	Alive	1453.26	High
TCGA-AR-A254	2605	Alive	1453.46	High
TCGA-B6-A0RT	2721	Alive	1457.32	High
TCGA-A2-A04X	1686	Alive	1459.13	High
TCGA-AO-A03M	1866	Alive	1459.31	High
TCGA-AN-A0G0	16	Alive	1460.25	High
TCGA-AC-A2QH	1005	Alive	1461.67	High
TCGA-AN-A041	7	Alive	1465.47	High
TCGA-EW-A1OY	908	Alive	1466.15	High
TCGA-AR-A24K	1548	Alive	1466.2	High
TCGA-AC-A2BM	3022	Alive	1466.62	High
TCGA-A8-A06X	943	Dead	1467.46	High
TCGA-A2-A0T4	624	Alive	1468.03	High
TCGA-A2-A04Q	2385	Alive	1470.11	High
TCGA-AN-A0XR	10	Alive	1471.27	High
TCGA-E9-A22H	1232	Alive	1472.1	High
TCGA-E2-A155	640	Alive	1475.74	High
TCGA-A2-A0SW	1365	Dead	1479.39	High
TCGA-A7-A56D	448	Alive	1481.98	High
TCGA-B6-A0IG	4456	Dead	1484.33	High
TCGA-A8-A084	458	Alive	1487.77	High
TCGA-B6-A0IB	3941	Dead	1489.98	High
TCGA-AO-A0JE	2335	Alive	1493.31	High
TCGA-B6-A0WV	2417	Dead	1495.28	High
TCGA-C8-A12P	358	Alive	1497.52	High
TCGA-C8-A8HR	408	Alive	1499.07	High
TCGA-AR-A2LO	1198	Alive	1500.26	High
TCGA-D8-A1J9	532	Alive	1508.11	High
TCGA-B6-A0RM	2373	Dead	1508.74	High
TCGA-AN-A04C	54	Alive	1516.94	High
TCGA-BH-A0RX	170	Alive	1520.01	High
TCGA-C8-A273	513	Alive	1531.02	High
TCGA-S3-A6ZF	572	Alive	1535.48	High
TCGA-C8-A1HN	394	Alive	1536.57	High
TCGA-A8-A07E	608	Alive	1543.84	High
TCGA-AO-A03L	2442	Alive	1545.77	High
TCGA-AN-A04A	90	Alive	1549.02	High
TCGA-A2-A0CT	2289	Alive	1551	High
TCGA-D8-A1Y2	433	Alive	1554.09	High
TCGA-AN-A0FV	10	Alive	1554.68	High
TCGA-B6-A0I1	2361	Dead	1554.8	High
TCGA-AQ-A54N	78	Alive	1558.57	High
TCGA-A8-A06Z	31	Alive	1558.86	High
TCGA-C8-A137	379	Alive	1559.21	High
TCGA-BH-AB28	287	Alive	1560.78	High
TCGA-AR-A0U3	4080	Alive	1561.32	High
TCGA-D8-A1JL	611	Alive	1570.37	High
TCGA-D8-A1Y0	472	Alive	1575.19	High
TCGA-A7-A4SE	644	Alive	1579.05	High
TCGA-A7-A3IZ	322	Alive	1582.06	High
TCGA-A8-A09N	31	Alive	1584.12	High
TCGA-B6-A2IU	5176	Alive	1588.07	High
TCGA-E2-A10A	1229	Alive	1588.31	High
TCGA-LL-A442	889	Alive	1594.03	High
TCGA-B6-A402	2134	Alive	1595.35	High
TCGA-E2-A1B6	867	Alive	1597.95	High
TCGA-AN-A03Y	10	Alive	1603.43	High
TCGA-A2-A0YH	659	Alive	1603.55	High
TCGA-BH-A0H7	702	Alive	1605.06	High
TCGA-AR-A255	2161	Alive	1609.25	High
TCGA-AR-A24Q	3172	Alive	1609.61	High
TCGA-A8-A07Z	1371	Alive	1613.47	High
TCGA-D8-A1JK	612	Alive	1614.29	High
TCGA-A1-A0SN	1196	Alive	1616.1	High
TCGA-D8-A1XZ	466	Alive	1626.3	High
TCGA-BH-A0B1	1148	Alive	1628.17	High
TCGA-EW-A1OV	789	Alive	1635.55	High
TCGA-A2-A0EQ	2426	Alive	1637.31	High
TCGA-AR-A1AT	1272	Dead	1637.64	High
TCGA-A8-A0A4	396	Alive	1642.18	High
TCGA-C8-A12U	385	Alive	1649.22	High
TCGA-D8-A1JC	480	Alive	1658.29	High
TCGA-AC-A2QJ	446	Dead	1660.6	High
TCGA-C8-A8HP	396	Alive	1660.64	High
TCGA-AO-A03R	2091	Alive	1669.84	High
TCGA-E2-A1II	1025	Alive	1674.14	High
TCGA-E9-A1R6	339	Alive	1676.95	High
TCGA-A2-A25D	552	Alive	1678.98	High
TCGA-BH-A0BW	2371	Alive	1680.18	High
TCGA-BH-A0DH	1156	Alive	1687.24	High
TCGA-B6-A0RE	7777	Alive	1687.66	High
TCGA-E9-A5FL	24	Alive	1697.03	High
TCGA-E2-A15H	393	Alive	1698.99	High
TCGA-A8-A07I	426	Alive	1699.04	High
TCGA-C8-A12V	385	Alive	1701.14	High
TCGA-LL-A5YO	440	Alive	1701.23	High
TCGA-AR-A1AR	524	Dead	1701.43	High
TCGA-B6-A0I9	362	Dead	1702.04	High
TCGA-D8-A1X6	541	Alive	1703.44	High
TCGA-E2-A1IE	2362	Alive	1704.89	High
TCGA-E2-A14Z	563	Dead	1706.28	High
TCGA-E2-A15A	710	Alive	1709.35	High
TCGA-A7-A4SF	545	Alive	1712.75	High
TCGA-D8-A1JJ	611	Alive	1725.13	High
TCGA-D8-A27W	373	Alive	1735.21	High
TCGA-E9-A6HE	847	Alive	1737.73	High
TCGA-A8-A076	1642	Alive	1744.62	High
TCGA-A8-A07U	760	Alive	1755.67	High
TCGA-AO-A0J2	997	Alive	1768.63	High
TCGA-EW-A1PD	424	Alive	1774.35	High
TCGA-A2-A0YT	723	Dead	1785.99	High
TCGA-AC-A4ZE	890	Alive	1788.31	High
TCGA-AR-A1AQ	3021	Alive	1791.32	High
TCGA-E9-A243	612	Alive	1797.2	High
TCGA-AN-A0FW	11	Alive	1797.88	High
TCGA-AQ-A04H	754	Alive	1798.12	High
TCGA-A8-A097	365	Alive	1799.7	High
TCGA-E2-A1LL	1309	Alive	1802.79	High
TCGA-AR-A0TS	2558	Alive	1802.88	High
TCGA-A8-A0AB	518	Alive	1814.19	High
TCGA-E2-A154	591	Alive	1822.07	High
TCGA-A8-A08J	1127	Dead	1835	High
TCGA-AO-A129	3286	Alive	1835.14	High
TCGA-AO-A0JD	2190	Alive	1836.89	High
TCGA-A8-A086	396	Alive	1847.02	High
TCGA-AR-A0TZ	3262	Dead	1848.29	High
TCGA-E2-A14X	972	Alive	1848.59	High
TCGA-BH-A0B5	2136	Alive	1854.9	High
TCGA-AO-A12F	1842	Alive	1857.93	High
TCGA-BH-A0H0	461	Alive	1873.65	High
TCGA-A2-A0YE	554	Alive	1881.18	High
TCGA-BH-A0B3	1203	Alive	1890.01	High
TCGA-E2-A15T	1563	Alive	1894.44	High
TCGA-E2-A1AZ	2329	Alive	1896.47	High
TCGA-E2-A15K	275	Alive	1901.06	High
TCGA-D8-A1XT	506	Alive	1908.33	High
TCGA-BH-A0W3	728	Alive	1912.6	High
TCGA-A8-A082	549	Alive	1923.6	High
TCGA-A7-A0CD	1165	Alive	1924.37	High
TCGA-AR-A0TV	2288	Alive	1924.73	High
TCGA-E2-A9RU	538	Alive	1926.2	High
TCGA-LL-A5YM	466	Alive	1928.93	High
TCGA-C8-A278	297	Alive	1934.04	High
TCGA-AR-A0TU	709	Alive	1941.46	High
TCGA-D8-A1JD	552	Alive	1947.98	High
TCGA-AC-A23H	174	Dead	1954.62	High
TCGA-A8-A08B	1156	Alive	1955.83	High
TCGA-B6-A1KN	4233	Alive	1957.16	High
TCGA-3C-AAAU	4047	Alive	1961.11	High
TCGA-A2-A0T0	533	Alive	1964.57	High
TCGA-OL-A5S0	620	Alive	1972.37	High
TCGA-E2-A15R	1732	Alive	1974.17	High
TCGA-A2-A04R	3709	Alive	1979.17	High
TCGA-A2-A0CL	3015	Alive	1982.95	High
TCGA-AO-A1KT	541	Alive	1985.27	High
TCGA-PE-A5DC	1430	Dead	1986.48	High
TCGA-A8-A075	518	Alive	1989.6	High
TCGA-OL-A66O	528	Alive	1993.65	High
TCGA-E2-A15S	428	Alive	1995.4	High
TCGA-AN-A0AT	10	Alive	1997.41	High
TCGA-E9-A1N6	678	Dead	2005.7	High
TCGA-C8-A27A	747	Alive	2014.12	High
TCGA-BH-A0E0	134	Alive	2017.67	High
TCGA-BH-A1FJ	1927	Dead	2025.77	High
TCGA-E9-A1RG	647	Alive	2026.8	High
TCGA-A8-A08I	365	Alive	2032.31	High
TCGA-E9-A3QA	918	Alive	2033.98	High
TCGA-PL-A8LZ	302	Alive	2038.65	High
TCGA-BH-A0HY	1545	Alive	2038.97	High
TCGA-A8-A07C	1034	Alive	2051.86	High
TCGA-AR-A0TQ	2991	Alive	2060.48	High
TCGA-A2-A1G4	595	Alive	2061.53	High
TCGA-AC-A3QQ	734	Alive	2068.33	High
TCGA-BH-A209	3959	Dead	2069.84	High
TCGA-AN-A0AM	5	Alive	2070.8	High
TCGA-AO-A0J6	1140	Alive	2072.64	High
TCGA-B6-A0X5	2097	Dead	2080.39	High
TCGA-A8-A08R	30	Alive	2095.17	High
TCGA-E9-A228	1285	Alive	2112.51	High
TCGA-AR-A0U4	3261	Alive	2113.36	High
TCGA-B6-A1KF	3088	Alive	2120.52	High
TCGA-AO-A0J4	1587	Alive	2131.41	High
TCGA-OL-A6VO	858	Alive	2137.68	High
TCGA-A2-A3XX	1439	Dead	2139.32	High
TCGA-A2-A0CX	1728	Alive	2148.72	High
TCGA-B6-A400	215	Alive	2156.93	High
TCGA-BH-A204	2534	Dead	2157.76	High
TCGA-BH-A0BD	554	Alive	2157.95	High
TCGA-EW-A1PB	608	Alive	2161.58	High
TCGA-E2-A107	1047	Alive	2164.63	High
TCGA-E9-A5UO	785	Alive	2178.28	High
TCGA-EW-A6SD	1010	Alive	2178.28	High
TCGA-AR-A24H	4894	Alive	2178.72	High
TCGA-AN-A0AL	227	Alive	2190.42	High
TCGA-LL-A7T0	376	Alive	2198.68	High
TCGA-B6-A0IK	571	Dead	2205.2	High
TCGA-C8-A1HJ	5	Alive	2209.03	High
TCGA-C8-A1HM	375	Alive	2215.44	High
TCGA-S3-AA15	525	Alive	2217.5	High
TCGA-AN-A049	19	Alive	2235.57	High
TCGA-A2-A0T1	521	Alive	2240.1	High
TCGA-A2-A1FX	1847	Alive	2244.4	High
TCGA-OL-A5RZ	679	Alive	2251.66	High
TCGA-AR-A0U2	2551	Dead	2253.51	High
TCGA-A8-A09Q	761	Alive	2263.98	High
TCGA-A8-A09I	1371	Alive	2265.52	High
TCGA-D8-A1XF	463	Alive	2266.79	High
TCGA-BH-A0BL	2278	Alive	2272.08	High
TCGA-A8-A08F	1004	Alive	2273.93	High
TCGA-E2-A159	762	Alive	2274.49	High
TCGA-BH-A1EV	365	Dead	2284.66	High
TCGA-AR-A251	3030	Alive	2295.55	High
TCGA-BH-A0BC	974	Alive	2299.22	High
TCGA-E9-A1RF	200	Alive	2322.02	High
TCGA-AC-A6IW	413	Alive	2327.42	High
TCGA-AR-A1AS	1150	Alive	2334.08	High
TCGA-A2-A0CW	3283	Alive	2334.82	High
TCGA-BH-A1FN	2192	Dead	2350.45	High
TCGA-AO-A03O	2483	Dead	2351.97	High
TCGA-AR-A2LK	1649	Dead	2356.37	High
TCGA-EW-A6SA	510	Alive	2374.18	High
TCGA-A2-A0SV	825	Dead	2376.22	High
TCGA-AR-A0TY	1699	Dead	2376.65	High
TCGA-3C-AALI	4005	Alive	2376.84	High
TCGA-LL-A7SZ	594	Alive	2384.67	High
TCGA-AN-A0AK	224	Alive	2400.5	High
TCGA-AC-A8OQ	34	Alive	2408.79	High
TCGA-C8-A12W	385	Alive	2421.67	High
TCGA-A2-A3XS	1032	Dead	2434.34	High
TCGA-C8-A26Y	394	Alive	2435.67	High
TCGA-BH-A0EE	943	Alive	2439.16	High
TCGA-A2-A0T3	1516	Alive	2452.07	High
TCGA-E2-A109	1417	Alive	2460.97	High
TCGA-EW-A1IW	371	Alive	2461.6	High
TCGA-A8-A092	942	Alive	2470.56	High
TCGA-AC-A7VB	250	Alive	2475.27	High
TCGA-D8-A13Z	635	Alive	2488.8	High
TCGA-A7-A0CE	1074	Alive	2489.02	High
TCGA-A2-A04T	2246	Alive	2496.04	High
TCGA-BH-A42T	320	Dead	2506.25	High
TCGA-C8-A1HF	332	Alive	2506.98	High
TCGA-OL-A66I	714	Alive	2523.94	High
TCGA-E2-A14V	1042	Alive	2526.91	High
TCGA-UL-AAZ6	518	Alive	2531.07	High
TCGA-BH-A0HB	806	Alive	2535.15	High
TCGA-D8-A147	584	Alive	2540.19	High
TCGA-A2-A0CM	754	Dead	2548.98	High
TCGA-D8-A1X5	565	Alive	2565.29	High
TCGA-AR-A1AJ	3072	Alive	2576.24	High
TCGA-Z7-A8R6	3256	Alive	2583.73	High
TCGA-A2-A0YG	666	Alive	2589.99	High
TCGA-A2-A0D4	767	Alive	2614.28	High
TCGA-A8-A095	1277	Alive	2618.43	High
TCGA-E2-A14Y	2109	Alive	2627.85	High
TCGA-A7-A13D	965	Alive	2631.06	High
TCGA-LL-A6FR	489	Alive	2637.4	High
TCGA-E2-A14N	1434	Alive	2644.63	High
TCGA-E2-A1LG	1523	Alive	2649.57	High
TCGA-C8-A3M8	394	Alive	2654.67	High
TCGA-A2-A04U	2654	Alive	2658.01	High
TCGA-A8-A09W	30	Alive	2671.56	High
TCGA-AR-A2LR	1742	Alive	2673.25	High
TCGA-BH-A1FC	3472	Dead	2685.99	High
TCGA-A2-A0SX	1534	Alive	2691.39	High
TCGA-AO-A128	3248	Alive	2704.75	High
TCGA-BH-A0DD	2486	Alive	2706.93	High
TCGA-E2-A1LI	3121	Alive	2728.67	High
TCGA-BH-A18T	224	Dead	2781.89	High
TCGA-A8-A06O	396	Alive	2787.12	High
TCGA-E9-A3HO	1158	Alive	2788.32	High
TCGA-B6-A0RL	2469	Dead	2794.77	High
TCGA-A2-A4S3	666	Alive	2805.81	High
TCGA-UU-A93S	116	Dead	2806.8	High
TCGA-AN-A0FY	10	Alive	2830.32	High
TCGA-BH-A202	795	Alive	2846.91	High
TCGA-A7-A6VX	317	Alive	2860.16	High
TCGA-E9-A22G	1239	Alive	2866.52	High
TCGA-A8-A09E	1492	Alive	2868.84	High
TCGA-B6-A0I2	4361	Alive	2880.72	High
TCGA-AO-A1KR	2513	Alive	2909.03	High
TCGA-BH-A0C7	2767	Alive	2916.31	High
TCGA-AR-A256	2854	Dead	2917.08	High
TCGA-A2-A0D2	1027	Alive	2918.13	High
TCGA-E2-A573	1062	Alive	2933.71	High
TCGA-AR-A1AI	3296	Alive	2936.01	High
TCGA-BH-A18U	1563	Dead	2949	High
TCGA-C8-A26W	381	Alive	2960.2	High
TCGA-AN-A0XU	10	Alive	2966.23	High
TCGA-AR-A1AY	1026	Alive	2971.25	High
TCGA-AC-A62X	417	Alive	2972.83	High
TCGA-BH-A0HU	392	Alive	2985.81	High
TCGA-BH-A5IZ	567	Alive	3026.23	High
TCGA-A7-A4SD	441	Alive	3031.34	High
TCGA-S3-A6ZH	641	Alive	3043.54	High
TCGA-AN-A0AJ	303	Alive	3058.24	High
TCGA-D8-A27F	488	Alive	3119.08	High
TCGA-EW-A3U0	532	Alive	3157.36	High
TCGA-EW-A1OW	694	Alive	3158.25	High
TCGA-E2-A158	450	Alive	3163.4	High
TCGA-A2-A3XT	2770	Alive	3174.31	High
TCGA-A8-A07W	304	Alive	3207.44	High
TCGA-A8-A079	274	Alive	3252.52	High
TCGA-A7-A13F	765	Alive	3280.32	High
TCGA-A2-A4RX	742	Alive	3288.59	High
TCGA-BH-A18R	1142	Dead	3307.58	High
TCGA-A2-A3XU	912	Dead	3351.02	High
TCGA-EW-A1P4	907	Alive	3367.12	High
TCGA-E2-A1L7	1836	Alive	3374.01	High
TCGA-BH-A18V	1556	Dead	3415.69	High
TCGA-A2-A3Y0	1546	Alive	3417.5	High
TCGA-OL-A5RW	1106	Alive	3477.15	High
TCGA-A8-A07R	273	Alive	3497.9	High
TCGA-D8-A1JM	590	Alive	3518.07	High
TCGA-OL-A5D7	1780	Alive	3537.93	High
TCGA-A8-A07O	304	Alive	3586.12	High
TCGA-AC-A2BK	2222	Alive	3590.66	High
TCGA-AC-A62V	348	Dead	3654.71	High
TCGA-AQ-A04J	819	Alive	3659.79	High
TCGA-LL-A5YP	450	Alive	3674.05	High
TCGA-A7-A6VW	285	Alive	3710.15	High
TCGA-E2-A14P	1246	Alive	3728.87	High
TCGA-S3-AA10	586	Alive	3739.26	High
TCGA-A2-A0YM	965	Alive	3767.51	High
TCGA-A7-A0CJ	931	Alive	3810.93	High
TCGA-AC-A7VC	1	Alive	3831.84	High
TCGA-A8-A085	1124	Alive	3841.13	High
TCGA-B6-A0IJ	7106	Alive	3923.2	High
TCGA-EW-A1OZ	1229	Alive	3964.82	High
TCGA-D8-A1XL	606	Alive	3987.61	High
TCGA-D8-A1XQ	499	Alive	4167.73	High
TCGA-E9-A1RB	976	Dead	4209.42	High
TCGA-AN-A0FJ	242	Alive	4214.89	High
TCGA-D8-A1XK	441	Alive	4238.95	High
TCGA-D8-A1JP	639	Alive	4299.71	High
TCGA-AR-A0TP	4275	Alive	4320.78	High
TCGA-BH-A0B9	1572	Alive	4323.33	High
TCGA-C8-A134	383	Alive	4325.07	High
TCGA-A8-A07L	975	Alive	4345.78	High
TCGA-GM-A3XL	2108	Alive	4364.49	High
TCGA-D8-A1Y3	430	Alive	4368.92	High
TCGA-HN-A2NL	79	Alive	4423.4	High
TCGA-GM-A2DH	2193	Alive	4423.47	High
TCGA-EW-A1P8	239	Dead	4483.15	High
TCGA-A2-A0D0	2048	Alive	4484.76	High
TCGA-A7-A6VY	266	Alive	4520.58	High
TCGA-BH-A0AV	1820	Alive	4578.58	High
TCGA-E2-A14R	1174	Alive	4592.92	High
TCGA-D8-A13Y	1728	Alive	4636.15	High
TCGA-A1-A0SI	635	Alive	4672.75	High
TCGA-AN-A04D	52	Alive	4737.11	High
TCGA-B6-A0IQ	4285	Alive	4759.52	High
TCGA-C8-A27B	439	Alive	4831.9	High
TCGA-BH-A18Q	1692	Dead	4871.76	High
TCGA-AN-A0FX	10	Alive	4942.26	High
TCGA-E9-A1N8	1039	Alive	5005.64	High
TCGA-A7-A6VV	313	Alive	5015.78	High
TCGA-A8-A08L	304	Dead	5015.86	High
TCGA-LL-A8F5	596	Alive	5162.12	High
TCGA-B6-A0I6	991	Dead	5617.02	High
TCGA-C8-A130	370	Alive	5619.73	High
TCGA-EW-A1PC	187	Alive	5751.18	High
TCGA-A1-A0SO	852	Alive	6195.42	High
TCGA-S3-AA0Z	629	Alive	6282.63	High
TCGA-A1-A0SP	584	Alive	6666.91	High
TCGA-D8-A143	431	Alive	7215.16	High
